# Supplementary material
Source: publisher figshare collection journal article supplement (https://acs.figshare.com/ndownloader/files/9254980)
Supplement: Supplementary file 1 [file 9254980]

 
data_11
 
_audit_creation_method            'SHELXL-2014/7'
_shelx_SHELXL_version_number      '2014/7'
_chemical_name_systematic         ?
_chemical_name_common             ?
_chemical_melting_point           ?
_chemical_formula_moiety          'C44 H7 F20 S4, Cl6 Sb, 4(C2 H3 N), O'
_chemical_formula_sum
 'C52 H19 Cl6 F20 N4 O S4 Sb' 
_chemical_formula_weight          1558.41

loop_
 _atom_type_symbol
 _atom_type_description
 _atom_type_scat_dispersion_real
 _atom_type_scat_dispersion_imag
 _atom_type_scat_source
 'C'  'C'   0.0033   0.0016
 'International Tables Vol C Tables 4.2.6.8 and 6.1.1.4'
 'H'  'H'   0.0000   0.0000
 'International Tables Vol C Tables 4.2.6.8 and 6.1.1.4'
 'O'  'O'   0.0106   0.0060
 'International Tables Vol C Tables 4.2.6.8 and 6.1.1.4'
 'F'  'F'   0.0171   0.0103
 'International Tables Vol C Tables 4.2.6.8 and 6.1.1.4'
 'S'  'S'   0.1246   0.1234
 'International Tables Vol C Tables 4.2.6.8 and 6.1.1.4'
 'Cl'  'Cl'   0.1484   0.1585
 'International Tables Vol C Tables 4.2.6.8 and 6.1.1.4'
 'Sb'  'Sb'  -0.5866   1.5461
 'International Tables Vol C Tables 4.2.6.8 and 6.1.1.4'
 'N'  'N'   0.0061   0.0033
 'International Tables Vol C Tables 4.2.6.8 and 6.1.1.4'
 
_space_group_crystal_system       triclinic
_space_group_IT_number            2
_space_group_name_H-M_alt         'P -1'
_space_group_name_Hall            '-P 1'
 
_shelx_space_group_comment
;
The symmetry employed for this shelxl refinement is uniquely defined
by the following loop, which should always be used as a source of
symmetry information in preference to the above space-group names.
They are only intended as comments.
;
 
loop_
 _space_group_symop_operation_xyz
 'x, y, z'
 '-x, -y, -z'
 
_cell_length_a                    13.599(2)
_cell_length_b                    14.523(2)
_cell_length_c                    15.318(2)
_cell_angle_alpha                 90.915(4)
_cell_angle_beta                  105.079(4)
_cell_angle_gamma                 92.619(3)
_cell_volume                      2916.8(7)
_cell_formula_units_Z             2
_cell_measurement_temperature     100(2)
_cell_measurement_reflns_used      9690
_cell_measurement_theta_min        2.25
_cell_measurement_theta_max       28.29
 
_exptl_crystal_description        rectangular
_exptl_crystal_colour             green
_exptl_crystal_density_meas       ?
_exptl_crystal_density_method     ?
_exptl_crystal_density_diffrn     1.774          
_exptl_crystal_F_000              1528
_exptl_transmission_factor_min    ?
_exptl_transmission_factor_max    ?
_exptl_crystal_size_max           0.20
_exptl_crystal_size_mid           0.15
_exptl_crystal_size_min           0.10
_exptl_absorpt_coefficient_mu     0.999
_shelx_estimated_absorpt_T_min    ?
_shelx_estimated_absorpt_T_max    ?
_exptl_absorpt_correction_type    ?
_exptl_absorpt_correction_T_min   ?
_exptl_absorpt_correction_T_max   ?
_exptl_absorpt_process_details    ?
_exptl_absorpt_special_details    ?
_diffrn_ambient_temperature       100(2)
_diffrn_radiation_wavelength      0.71073
_diffrn_radiation_type            MoK\a
_diffrn_source                    ?
_diffrn_measurement_device_type   'Bruker APEX-II CCD'
_diffrn_measurement_method        '\f and \w scans'
_diffrn_detector_area_resol_mean  ?
_diffrn_reflns_number             53394
_diffrn_reflns_av_unetI/netI      0.0375
_diffrn_reflns_av_R_equivalents   0.0380
_diffrn_reflns_limit_h_min        -12
_diffrn_reflns_limit_h_max        12
_diffrn_reflns_limit_k_min        -19
_diffrn_reflns_limit_k_max        19
_diffrn_reflns_limit_l_min        -20
_diffrn_reflns_limit_l_max        20
_diffrn_reflns_theta_min          1.995
_diffrn_reflns_theta_max          28.439
_diffrn_reflns_theta_full         25.242
_diffrn_measured_fraction_theta_max   0.985
_diffrn_measured_fraction_theta_full  0.996
_diffrn_reflns_Laue_measured_fraction_max    0.985
_diffrn_reflns_Laue_measured_fraction_full   0.996
_diffrn_reflns_point_group_measured_fraction_max   0.985
_diffrn_reflns_point_group_measured_fraction_full  0.996
_reflns_number_total              14716
_reflns_number_gt                 11971
_reflns_threshold_expression      'I > 2\s(I)'
_reflns_Friedel_coverage          0.000
_reflns_Friedel_fraction_max      .
_reflns_Friedel_fraction_full     .
 
_reflns_special_details
;
 Reflections were merged by SHELXL according to the crystal
 class for the calculation of statistics and refinement.
 
 _reflns_Friedel_fraction is defined as the number of unique
 Friedel pairs measured divided by the number that would be
 possible theoretically, ignoring centric projections and
 systematic absences.
;
 
_computing_data_collection       'Bruker APEX2'
_computing_cell_refinement       'Bruker SAINT'
_computing_data_reduction        'Bruker SAINT'
_computing_structure_solution    'SHELXS-97 (Sheldrick 2008)'
_computing_structure_refinement  'SHELXL-2014/7 (Sheldrick, 2014)'
_computing_molecular_graphics    'Bruker SHELXTL'
_computing_publication_material  'Bruker SHELXTL'
_refine_special_details           ?
_refine_ls_structure_factor_coef  Fsqd
_refine_ls_matrix_type            full
_refine_ls_weighting_scheme       calc
_refine_ls_weighting_details
'w=1/[\s^2^(Fo^2^)+(0.0418P)^2^+2.6362P] where P=(Fo^2^+2Fc^2^)/3'
_atom_sites_solution_primary      ?
_atom_sites_solution_secondary    ?
_atom_sites_solution_hydrogens    geom
_refine_ls_hydrogen_treatment     constr
_refine_ls_extinction_method      none
_refine_ls_extinction_coef        .
_refine_ls_number_reflns          14497
_refine_ls_number_parameters      827
_refine_ls_number_restraints      26
_refine_ls_R_factor_all           0.0446
_refine_ls_R_factor_gt            0.0332
_refine_ls_wR_factor_ref          0.0883
_refine_ls_wR_factor_gt           0.0816
_refine_ls_goodness_of_fit_ref    1.026
_refine_ls_restrained_S_all       1.027
_refine_ls_shift/su_max           0.001
_refine_ls_shift/su_mean          0.000
 
loop_
 _atom_site_label
 _atom_site_type_symbol
 _atom_site_fract_x
 _atom_site_fract_y
 _atom_site_fract_z
 _atom_site_U_iso_or_equiv
 _atom_site_adp_type
 _atom_site_occupancy
 _atom_site_site_symmetry_order  
 _atom_site_calc_flag
 _atom_site_refinement_flags_posn
 _atom_site_refinement_flags_adp
 _atom_site_refinement_flags_occupancy
 _atom_site_disorder_assembly
 _atom_site_disorder_group
Sb1 Sb 0.5000 0.0000 0.5000 0.01572(6) Uani 1 2 d S . P . .
Sb2 Sb 1.0000 0.5000 0.5000 0.01843(6) Uani 1 2 d S . P . .
S2 S 0.70741(4) 0.69297(4) 0.43603(4) 0.01378(11) Uani 1 1 d . . . . .
S3 S 0.63591(4) 0.59519(4) 0.56951(4) 0.01385(11) Uani 1 1 d . . . . .
S4 S 0.62782(4) 0.46746(4) 0.42466(4) 0.01399(11) Uani 1 1 d . . . . .
C2 C 0.69174(17) 0.65058(15) 0.23042(15) 0.0149(4) Uani 1 1 d . . . . .
C3 C 0.69194(16) 0.56795(15) 0.27573(15) 0.0140(4) Uani 1 1 d . . . . .
H3 H 0.7260 0.5632 0.3379 0.017 Uiso 1 1 calc R U . . .
C4 C 0.63877(17) 0.49265(15) 0.22364(15) 0.0156(4) Uani 1 1 d . . . . .
C1 C 0.6411(9) 0.6360(8) 0.1336(6) 0.028(3) Uani 0.7 1 d D U P A 1
O1 O 0.62627(18) 0.69016(17) 0.07241(17) 0.0274(5) Uani 0.8 1 d D U P A 1
S1 S 0.59041(19) 0.51766(14) 0.11018(15) 0.0166(4) Uani 0.7 1 d . . P A 1
S1' S 0.6359(4) 0.6391(3) 0.1153(4) 0.0261(11) Uani 0.3 1 d . . P A 2
O1' O 0.5670(7) 0.4736(6) 0.0599(7) 0.028(2) Uani 0.2 1 d D U P A 2
C1' C 0.602(2) 0.5230(17) 0.1236(14) 0.027(7) Uani 0.3 1 d D U P A 2
C5 C 0.61795(16) 0.40404(15) 0.25238(15) 0.0145(4) Uani 1 1 d . . . . .
C6 C 0.58462(17) 0.32818(15) 0.18243(15) 0.0151(4) Uani 1 1 d . . . . .
C7 C 0.64865(17) 0.29788(15) 0.13217(16) 0.0182(5) Uani 1 1 d . . . . .
C8 C 0.61830(19) 0.22936(16) 0.06607(17) 0.0211(5) Uani 1 1 d . . . . .
C9 C 0.5212(2) 0.18876(16) 0.04967(17) 0.0230(5) Uani 1 1 d . . . . .
C10 C 0.45558(19) 0.21714(18) 0.09781(17) 0.0241(5) Uani 1 1 d . . . . .
C11 C 0.48704(18) 0.28624(17) 0.16354(16) 0.0197(5) Uani 1 1 d . . . . .
C12 C 0.62103(16) 0.38294(15) 0.34195(15) 0.0155(4) Uani 1 1 d . . . . .
C13 C 0.61665(18) 0.29485(16) 0.37840(16) 0.0185(5) Uani 1 1 d . . . . .
H01F H 0.6107 0.2392 0.3435 0.022 Uiso 1 1 calc R U . . .
C14 C 0.62184(17) 0.29693(15) 0.46898(16) 0.0176(5) Uani 1 1 d . . . . .
H013 H 0.6198 0.2427 0.5025 0.021 Uiso 1 1 calc R U . . .
C15 C 0.63053(16) 0.38695(15) 0.50836(15) 0.0152(4) Uani 1 1 d . . . . .
C16 C 0.64800(16) 0.41002(15) 0.60084(15) 0.0141(4) Uani 1 1 d . . . . .
C17 C 0.65974(16) 0.33390(15) 0.66602(15) 0.0155(4) Uani 1 1 d . . . . .
C18 C 0.73724(18) 0.27248(16) 0.67764(16) 0.0189(5) Uani 1 1 d . . . . .
C19 C 0.74480(18) 0.20164(16) 0.73730(17) 0.0207(5) Uani 1 1 d . . . . .
C20 C 0.6744(2) 0.18996(16) 0.78716(16) 0.0212(5) Uani 1 1 d . . . . .
C21 C 0.59737(18) 0.25051(16) 0.77846(16) 0.0190(5) Uani 1 1 d . . . . .
C22 C 0.59176(17) 0.32106(15) 0.71920(16) 0.0162(4) Uani 1 1 d . . . . .
C23 C 0.66510(16) 0.50070(15) 0.63695(15) 0.0145(4) Uani 1 1 d . . . . .
C24 C 0.72558(17) 0.53045(16) 0.72386(16) 0.0164(4) Uani 1 1 d . . . . .
H01O H 0.7418 0.4911 0.7740 0.020 Uiso 1 1 calc R U . . .
C25 C 0.75830(17) 0.62171(16) 0.72834(16) 0.0170(4) Uani 1 1 d . . . . .
H019 H 0.8000 0.6516 0.7817 0.020 Uiso 1 1 calc R U . . .
C26 C 0.72368(16) 0.66658(15) 0.64559(15) 0.0146(4) Uani 1 1 d . . . . .
C27 C 0.76563(16) 0.74753(15) 0.61761(16) 0.0151(4) Uani 1 1 d . . . . .
C28 C 0.82771(18) 0.81165(15) 0.69004(15) 0.0170(5) Uani 1 1 d . . . . .
C29 C 0.78132(19) 0.85896(16) 0.74636(16) 0.0201(5) Uani 1 1 d . . . . .
C30 C 0.8373(2) 0.91992(16) 0.81374(17) 0.0259(6) Uani 1 1 d . . . . .
C31 C 0.9405(2) 0.93326(18) 0.82505(19) 0.0317(6) Uani 1 1 d . . . . .
C32 C 0.9880(2) 0.88645(19) 0.77112(19) 0.0305(6) Uani 1 1 d . . . . .
C33 C 0.93219(19) 0.82641(17) 0.70388(17) 0.0229(5) Uani 1 1 d . . . . .
C34 C 0.76199(17) 0.76749(15) 0.52757(16) 0.0154(4) Uani 1 1 d . . . . .
C35 C 0.80969(17) 0.84499(15) 0.49703(16) 0.0177(5) Uani 1 1 d . . . . .
H01X H 0.8432 0.8947 0.5362 0.021 Uiso 1 1 calc R U . . .
C36 C 0.80343(17) 0.84213(15) 0.40663(16) 0.0173(5) Uani 1 1 d . . . . .
H01L H 0.8319 0.8894 0.3771 0.021 Uiso 1 1 calc R U . . .
C37 C 0.75028(16) 0.76163(14) 0.36101(16) 0.0145(4) Uani 1 1 d . . . . .
C38 C 0.72935(17) 0.73873(15) 0.26826(16) 0.0149(4) Uani 1 1 d . . . . .
C39 C 0.74436(17) 0.81408(14) 0.20766(15) 0.0151(4) Uani 1 1 d . . . . .
C40 C 0.69492(18) 0.89645(15) 0.20594(16) 0.0174(5) Uani 1 1 d . . . . .
C41 C 0.70725(19) 0.96593(15) 0.14880(16) 0.0195(5) Uani 1 1 d . . . . .
C42 C 0.76748(19) 0.95478(16) 0.09061(16) 0.0194(5) Uani 1 1 d . . . . .
C43 C 0.81707(18) 0.87357(16) 0.09016(16) 0.0192(5) Uani 1 1 d . . . . .
C44 C 0.80557(17) 0.80574(15) 0.14840(16) 0.0166(4) Uani 1 1 d . . . . .
C45 C 0.0195(2) 0.7337(2) -0.0424(2) 0.0328(6) Uani 1 1 d . . . . .
C46 C 0.0952(2) 0.7794(2) 0.0323(2) 0.0436(8) Uani 1 1 d . . . . .
H02A H 0.1568 0.7441 0.0468 0.065 Uiso 1 1 calc R U . . .
H02B H 0.0677 0.7832 0.0853 0.065 Uiso 1 1 calc R U . . .
H02C H 0.1121 0.8416 0.0151 0.065 Uiso 1 1 calc R U . . .
C47 C 0.9341(3) 0.4921(3) 0.1869(3) 0.0630(11) Uani 1 1 d . . . . .
H02I H 0.8826 0.4761 0.1302 0.094 Uiso 1 1 calc R U . . .
H02J H 0.9032 0.5272 0.2271 0.094 Uiso 1 1 calc R U . . .
H02K H 0.9606 0.4356 0.2163 0.094 Uiso 1 1 calc R U . . .
C48 C 1.0156(3) 0.5467(3) 0.1680(3) 0.0587(10) Uani 1 1 d . . . . .
C49 C 0.8791(3) 0.1409(2) 0.4860(3) 0.0533(10) Uani 1 1 d . . . . .
H02D H 0.8942 0.1236 0.4290 0.080 Uiso 1 1 calc R U . . .
H02E H 0.9008 0.2057 0.5015 0.080 Uiso 1 1 calc R U . . .
H02F H 0.8056 0.1323 0.4794 0.080 Uiso 1 1 calc R U . . .
C50 C 0.9331(3) 0.0834(2) 0.5571(3) 0.0448(8) Uani 1 1 d . . . . .
C51 C 0.7756(5) 0.5638(4) 0.9652(4) 0.0868(16) Uani 1 1 d . . . . .
H02M H 0.8383 0.5653 0.9448 0.130 Uiso 1 1 calc R U . . .
H02N H 0.7926 0.5789 1.0302 0.130 Uiso 1 1 calc R U . . .
H02O H 0.7297 0.6091 0.9322 0.130 Uiso 1 1 calc R U . . .
C52 C 0.7259(5) 0.4725(4) 0.9480(4) 0.0844(16) Uani 1 1 d . . . . .
Cl1 Cl 0.46344(6) -0.06724(4) 0.62725(5) 0.03191(15) Uani 1 1 d . . . . .
Cl2 Cl 0.67434(4) 0.02191(4) 0.57990(5) 0.02966(15) Uani 1 1 d . . . . .
Cl3 Cl 0.46805(4) 0.14542(4) 0.55588(4) 0.02224(12) Uani 1 1 d . . . . .
Cl6 Cl 0.87356(4) 0.40406(4) 0.39934(5) 0.02619(14) Uani 1 1 d . . . . .
Cl7 Cl 0.95071(4) 0.62848(4) 0.40793(5) 0.02639(14) Uani 1 1 d . . . . .
Cl10 Cl 0.88373(4) 0.53424(4) 0.58436(5) 0.02622(13) Uani 1 1 d . . . . .
F1 F 0.42050(11) 0.31555(11) 0.20704(11) 0.0303(4) Uani 1 1 d . . . . .
F2 F 0.36054(13) 0.17966(13) 0.08008(12) 0.0392(4) Uani 1 1 d . . . . .
F3 F 0.49112(13) 0.12194(11) -0.01398(11) 0.0341(4) Uani 1 1 d . . . . .
F4 F 0.68197(13) 0.20051(11) 0.02017(11) 0.0327(4) Uani 1 1 d . . . . .
F5 F 0.74385(11) 0.33492(10) 0.14815(11) 0.0281(3) Uani 1 1 d . . . . .
F6 F 0.85527(11) 0.72792(9) 0.14679(10) 0.0242(3) Uani 1 1 d . . . . .
F7 F 0.87439(12) 0.86123(10) 0.03254(10) 0.0260(3) Uani 1 1 d . . . . .
F8 F 0.77817(13) 1.02134(10) 0.03477(10) 0.0278(3) Uani 1 1 d . . . . .
F9 F 0.65853(13) 1.04423(9) 0.14913(11) 0.0295(3) Uani 1 1 d . . . . .
F10 F 0.63280(11) 0.90893(9) 0.25892(10) 0.0232(3) Uani 1 1 d . . . . .
F11 F 0.80708(11) 0.28207(10) 0.63065(10) 0.0259(3) Uani 1 1 d . . . . .
F12 F 0.82175(12) 0.14455(10) 0.74813(11) 0.0296(4) Uani 1 1 d . . . . .
F13 F 0.68123(13) 0.12117(10) 0.84440(11) 0.0308(4) Uani 1 1 d . . . . .
F14 F 0.52937(12) 0.23991(11) 0.82688(11) 0.0287(3) Uani 1 1 d . . . . .
F15 F 0.51598(10) 0.37911(10) 0.71165(10) 0.0225(3) Uani 1 1 d . . . . .
F16 F 0.98118(11) 0.78047(11) 0.65318(11) 0.0309(4) Uani 1 1 d . . . . .
F17 F 1.08963(13) 0.89848(14) 0.78370(13) 0.0479(5) Uani 1 1 d . . . . .
F18 F 0.99431(16) 0.99165(12) 0.89017(12) 0.0466(5) Uani 1 1 d . . . . .
F19 F 0.79084(15) 0.96571(11) 0.86620(11) 0.0377(4) Uani 1 1 d . . . . .
F20 F 0.68130(11) 0.84712(10) 0.73606(10) 0.0273(3) Uani 1 1 d . . . . .
N1 N 1.0812(3) 0.5899(3) 0.1532(3) 0.0932(15) Uani 1 1 d . . . . .
N2 N -0.0389(2) 0.6990(2) -0.1011(2) 0.0486(7) Uani 1 1 d . . . . .
N3 N 0.6874(5) 0.3996(4) 0.9324(4) 0.119(2) Uani 1 1 d . . . . .
N4 N 0.9761(3) 0.0377(2) 0.6111(3) 0.0596(9) Uani 1 1 d . . . . .
 
loop_
 _atom_site_aniso_label
 _atom_site_aniso_U_11
 _atom_site_aniso_U_22
 _atom_site_aniso_U_33
 _atom_site_aniso_U_23
 _atom_site_aniso_U_13
 _atom_site_aniso_U_12
Sb1 0.01423(10) 0.01015(10) 0.02371(12) -0.00178(8) 0.00704(8) -0.00098(7)
Sb2 0.00975(10) 0.01431(10) 0.03174(13) 0.00070(9) 0.00599(8) 0.00241(7)
S2 0.0167(2) 0.0112(2) 0.0134(3) 0.00036(19) 0.0038(2) 0.00045(19)
S3 0.0112(2) 0.0146(2) 0.0151(3) 0.0006(2) 0.00239(19) 0.00069(18)
S4 0.0149(2) 0.0131(2) 0.0135(3) 0.0001(2) 0.00313(19) -0.00061(19)
C2 0.0152(10) 0.0150(10) 0.0151(11) 0.0012(8) 0.0044(8) 0.0032(8)
C3 0.0140(10) 0.0139(10) 0.0156(11) 0.0020(8) 0.0061(8) 0.0023(8)
C4 0.0157(10) 0.0157(10) 0.0150(11) -0.0001(8) 0.0030(8) 0.0023(8)
C1 0.028(3) 0.028(3) 0.029(3) 0.0009(10) 0.0078(12) 0.0023(10)
O1 0.0336(11) 0.0236(10) 0.0231(11) 0.0050(10) 0.0040(9) 0.0003(9)
S1 0.0236(7) 0.0115(6) 0.0119(6) 0.0014(4) 0.0003(5) -0.0026(4)
S1' 0.0340(18) 0.0148(16) 0.022(2) -0.0006(15) -0.0071(16) 0.0027(9)
O1' 0.032(3) 0.023(2) 0.024(3) 0.0030(19) 0.0003(18) 0.0015(18)
C1' 0.027(7) 0.026(7) 0.027(7) 0.0006(10) 0.007(2) 0.0012(11)
C5 0.0126(10) 0.0142(10) 0.0158(11) -0.0019(8) 0.0022(8) -0.0002(8)
C6 0.0187(11) 0.0108(10) 0.0145(11) 0.0025(8) 0.0022(8) 0.0002(8)
C7 0.0178(11) 0.0151(11) 0.0212(12) 0.0005(9) 0.0042(9) -0.0005(8)
C8 0.0290(13) 0.0160(11) 0.0192(12) 0.0008(9) 0.0071(10) 0.0047(9)
C9 0.0338(14) 0.0152(11) 0.0168(12) -0.0029(9) 0.0018(10) -0.0027(9)
C10 0.0227(12) 0.0254(12) 0.0197(12) -0.0020(10) -0.0006(10) -0.0100(10)
C11 0.0197(11) 0.0217(12) 0.0174(12) -0.0006(9) 0.0051(9) -0.0019(9)
C12 0.0137(10) 0.0156(10) 0.0164(11) -0.0023(8) 0.0029(8) -0.0019(8)
C13 0.0201(11) 0.0143(10) 0.0206(12) -0.0018(9) 0.0058(9) -0.0050(8)
C14 0.0200(11) 0.0130(10) 0.0190(11) 0.0018(9) 0.0046(9) -0.0043(8)
C15 0.0113(10) 0.0177(10) 0.0159(11) 0.0014(8) 0.0032(8) -0.0026(8)
C16 0.0090(9) 0.0159(10) 0.0172(11) 0.0038(8) 0.0033(8) -0.0007(8)
C17 0.0146(10) 0.0144(10) 0.0159(11) -0.0020(8) 0.0017(8) -0.0017(8)
C18 0.0178(11) 0.0218(11) 0.0171(11) -0.0026(9) 0.0048(9) 0.0023(9)
C19 0.0225(12) 0.0194(11) 0.0192(12) -0.0010(9) 0.0023(9) 0.0086(9)
C20 0.0308(13) 0.0149(11) 0.0153(11) 0.0032(9) 0.0011(10) 0.0019(9)
C21 0.0197(11) 0.0205(11) 0.0181(11) 0.0022(9) 0.0074(9) -0.0013(9)
C22 0.0143(10) 0.0156(10) 0.0178(11) 0.0007(9) 0.0029(8) 0.0013(8)
C23 0.0123(10) 0.0165(10) 0.0155(11) 0.0026(8) 0.0049(8) 0.0016(8)
C24 0.0160(10) 0.0176(11) 0.0160(11) 0.0022(9) 0.0047(8) 0.0010(8)
C25 0.0164(10) 0.0180(11) 0.0159(11) -0.0014(9) 0.0031(8) 0.0016(8)
C26 0.0135(10) 0.0140(10) 0.0161(11) -0.0021(8) 0.0034(8) 0.0019(8)
C27 0.0148(10) 0.0123(10) 0.0174(11) -0.0021(8) 0.0028(8) 0.0027(8)
C28 0.0249(12) 0.0117(10) 0.0130(11) 0.0001(8) 0.0024(9) 0.0010(8)
C29 0.0298(13) 0.0137(10) 0.0169(11) 0.0039(9) 0.0053(10) 0.0044(9)
C30 0.0493(17) 0.0138(11) 0.0156(12) -0.0004(9) 0.0092(11) 0.0070(10)
C31 0.0496(17) 0.0169(12) 0.0222(13) -0.0033(10) -0.0002(12) -0.0068(11)
C32 0.0316(14) 0.0280(14) 0.0278(14) -0.0036(11) 0.0023(11) -0.0098(11)
C33 0.0244(12) 0.0226(12) 0.0206(12) -0.0027(10) 0.0050(10) -0.0024(9)
C34 0.0171(10) 0.0124(10) 0.0163(11) -0.0010(8) 0.0031(8) 0.0045(8)
C35 0.0192(11) 0.0120(10) 0.0204(12) -0.0003(9) 0.0027(9) 0.0009(8)
C36 0.0188(11) 0.0117(10) 0.0211(12) 0.0009(9) 0.0043(9) 0.0005(8)
C37 0.0148(10) 0.0101(10) 0.0196(11) 0.0035(8) 0.0053(8) 0.0034(8)
C38 0.0155(10) 0.0114(10) 0.0188(11) 0.0022(8) 0.0056(8) 0.0035(8)
C39 0.0189(11) 0.0100(10) 0.0158(11) 0.0012(8) 0.0037(8) -0.0002(8)
C40 0.0201(11) 0.0148(10) 0.0181(11) 0.0017(9) 0.0063(9) 0.0028(8)
C41 0.0270(12) 0.0114(10) 0.0190(12) 0.0007(9) 0.0033(9) 0.0042(9)
C42 0.0289(12) 0.0136(10) 0.0149(11) 0.0038(8) 0.0047(9) -0.0022(9)
C43 0.0235(12) 0.0181(11) 0.0171(11) -0.0028(9) 0.0080(9) -0.0018(9)
C44 0.0191(11) 0.0130(10) 0.0174(11) -0.0007(8) 0.0042(9) 0.0022(8)
C45 0.0337(15) 0.0308(14) 0.0314(16) 0.0032(12) 0.0042(12) -0.0003(12)
C46 0.0309(16) 0.053(2) 0.0405(19) -0.0077(15) 0.0004(13) -0.0114(14)
C47 0.046(2) 0.074(3) 0.069(3) -0.017(2) 0.016(2) 0.0000(19)
C48 0.042(2) 0.077(3) 0.058(3) 0.021(2) 0.0107(18) 0.024(2)
C49 0.063(2) 0.0380(18) 0.071(3) 0.0046(18) 0.038(2) 0.0010(16)
C50 0.0440(19) 0.0280(16) 0.071(3) -0.0003(16) 0.0325(18) -0.0060(14)
C51 0.103(4) 0.087(4) 0.069(3) -0.007(3) 0.024(3) -0.012(3)
C52 0.104(4) 0.078(3) 0.075(3) -0.017(3) 0.034(3) -0.019(3)
Cl1 0.0489(4) 0.0185(3) 0.0348(4) 0.0043(3) 0.0224(3) 0.0016(3)
Cl2 0.0162(3) 0.0274(3) 0.0418(4) -0.0117(3) 0.0021(2) 0.0009(2)
Cl3 0.0213(3) 0.0127(2) 0.0351(3) -0.0048(2) 0.0120(2) -0.0004(2)
Cl6 0.0150(3) 0.0214(3) 0.0402(4) -0.0044(3) 0.0041(2) -0.0005(2)
Cl7 0.0186(3) 0.0198(3) 0.0413(4) 0.0069(3) 0.0078(2) 0.0048(2)
Cl10 0.0150(3) 0.0282(3) 0.0381(4) -0.0003(3) 0.0110(2) 0.0055(2)
F1 0.0187(7) 0.0428(9) 0.0298(9) -0.0116(7) 0.0096(6) -0.0075(6)
F2 0.0302(9) 0.0495(10) 0.0329(9) -0.0139(8) 0.0047(7) -0.0233(8)
F3 0.0496(10) 0.0258(8) 0.0225(8) -0.0123(6) 0.0037(7) -0.0085(7)
F4 0.0397(9) 0.0297(8) 0.0326(9) -0.0099(7) 0.0165(7) 0.0062(7)
F5 0.0186(7) 0.0304(8) 0.0372(9) -0.0096(7) 0.0120(6) -0.0041(6)
F6 0.0314(8) 0.0161(7) 0.0302(8) 0.0032(6) 0.0158(6) 0.0095(6)
F7 0.0351(8) 0.0246(7) 0.0237(8) 0.0007(6) 0.0172(6) 0.0006(6)
F8 0.0482(10) 0.0175(7) 0.0205(8) 0.0077(6) 0.0139(7) 0.0000(6)
F9 0.0474(10) 0.0138(7) 0.0321(9) 0.0086(6) 0.0163(7) 0.0136(6)
F10 0.0307(8) 0.0184(7) 0.0264(8) 0.0055(6) 0.0161(6) 0.0094(6)
F11 0.0211(7) 0.0335(8) 0.0275(8) 0.0041(6) 0.0128(6) 0.0085(6)
F12 0.0322(8) 0.0268(8) 0.0298(9) 0.0030(6) 0.0054(7) 0.0184(6)
F13 0.0466(10) 0.0221(7) 0.0245(8) 0.0114(6) 0.0091(7) 0.0095(7)
F14 0.0310(8) 0.0321(8) 0.0284(8) 0.0119(7) 0.0165(7) 0.0025(6)
F15 0.0172(7) 0.0271(7) 0.0266(8) 0.0102(6) 0.0101(6) 0.0090(5)
F16 0.0199(7) 0.0403(9) 0.0322(9) -0.0114(7) 0.0078(6) -0.0027(6)
F17 0.0311(9) 0.0557(12) 0.0486(12) -0.0161(9) 0.0003(8) -0.0188(8)
F18 0.0667(13) 0.0335(9) 0.0300(10) -0.0173(8) -0.0008(9) -0.0137(9)
F19 0.0647(12) 0.0275(8) 0.0217(8) -0.0053(7) 0.0108(8) 0.0164(8)
F20 0.0293(8) 0.0307(8) 0.0242(8) -0.0008(6) 0.0097(6) 0.0102(6)
N1 0.061(3) 0.108(3) 0.118(4) 0.069(3) 0.027(2) 0.038(2)
N2 0.0520(17) 0.0445(16) 0.0385(16) -0.0021(13) -0.0067(13) -0.0005(13)
N3 0.160(5) 0.089(3) 0.113(4) -0.033(3) 0.059(4) -0.046(4)
N4 0.0491(19) 0.0449(18) 0.089(3) 0.0127(18) 0.0262(18) -0.0053(14)
 
_geom_special_details
;
 All esds (except the esd in the dihedral angle between two l.s. planes)
 are estimated using the full covariance matrix.  The cell esds are taken
 into account individually in the estimation of esds in distances, angles
 and torsion angles; correlations between esds in cell parameters are only
 used when they are defined by crystal symmetry.  An approximate (isotropic)
 treatment of cell esds is used for estimating esds involving l.s. planes.
;
 
loop_
 _geom_bond_atom_site_label_1
 _geom_bond_atom_site_label_2
 _geom_bond_distance
 _geom_bond_site_symmetry_2
 _geom_bond_publ_flag
Sb1 Cl1 2.3496(7) 2_656 ?
Sb1 Cl1 2.3496(7) . ?
Sb1 Cl3 2.3667(6) . ?
Sb1 Cl3 2.3667(6) 2_656 ?
Sb1 Cl2 2.3727(7) . ?
Sb1 Cl2 2.3727(7) 2_656 ?
Sb2 Cl10 2.3519(7) . ?
Sb2 Cl10 2.3520(7) 2_766 ?
Sb2 Cl6 2.3682(6) . ?
Sb2 Cl6 2.3682(6) 2_766 ?
Sb2 Cl7 2.3719(7) . ?
Sb2 Cl7 2.3719(7) 2_766 ?
S2 C37 1.728(2) . ?
S2 C34 1.739(2) . ?
S3 C26 1.727(2) . ?
S3 C23 1.729(2) . ?
S4 C12 1.732(2) . ?
S4 C15 1.743(2) . ?
C2 C3 1.395(3) . ?
C2 C38 1.414(3) . ?
C2 C1 1.471(9) . ?
C2 S1' 1.731(6) . ?
C3 C4 1.398(3) . ?
C3 H3 0.9500 . ?
C4 C5 1.407(3) . ?
C4 C1' 1.56(2) . ?
C4 S1 1.741(3) . ?
C1 O1 1.215(9) . ?
C1 S1 1.818(12) . ?
S1' C1' 1.74(3) . ?
O1' C1' 1.183(15) . ?
C5 C12 1.401(3) . ?
C5 C6 1.494(3) . ?
C6 C7 1.385(3) . ?
C6 C11 1.392(3) . ?
C7 F5 1.339(3) . ?
C7 C8 1.378(3) . ?
C8 F4 1.327(3) . ?
C8 C9 1.381(4) . ?
C9 F3 1.336(3) . ?
C9 C10 1.370(4) . ?
C10 F2 1.338(3) . ?
C10 C11 1.381(3) . ?
C11 F1 1.336(3) . ?
C12 C13 1.409(3) . ?
C13 C14 1.371(3) . ?
C13 H01F 0.9500 . ?
C14 C15 1.418(3) . ?
C14 H013 0.9500 . ?
C15 C16 1.406(3) . ?
C16 C23 1.406(3) . ?
C16 C17 1.487(3) . ?
C17 C18 1.390(3) . ?
C17 C22 1.391(3) . ?
C18 F11 1.337(3) . ?
C18 C19 1.376(4) . ?
C19 F12 1.343(3) . ?
C19 C20 1.377(4) . ?
C20 F13 1.330(3) . ?
C20 C21 1.380(3) . ?
C21 F14 1.333(3) . ?
C21 C22 1.371(3) . ?
C22 F15 1.344(3) . ?
C23 C24 1.420(3) . ?
C24 C25 1.373(3) . ?
C24 H01O 0.9500 . ?
C25 C26 1.413(3) . ?
C25 H019 0.9500 . ?
C26 C27 1.405(3) . ?
C27 C34 1.403(3) . ?
C27 C28 1.490(3) . ?
C28 C29 1.385(3) . ?
C28 C33 1.387(3) . ?
C29 F20 1.331(3) . ?
C29 C30 1.389(3) . ?
C30 F19 1.332(3) . ?
C30 C31 1.372(4) . ?
C31 F18 1.337(3) . ?
C31 C32 1.365(4) . ?
C32 F17 1.348(3) . ?
C32 C33 1.379(3) . ?
C33 F16 1.336(3) . ?
C34 C35 1.419(3) . ?
C35 C36 1.365(3) . ?
C35 H01X 0.9500 . ?
C36 C37 1.418(3) . ?
C36 H01L 0.9500 . ?
C37 C38 1.406(3) . ?
C38 C39 1.487(3) . ?
C39 C44 1.389(3) . ?
C39 C40 1.396(3) . ?
C40 F10 1.331(3) . ?
C40 C41 1.379(3) . ?
C41 F9 1.343(3) . ?
C41 C42 1.371(4) . ?
C42 F8 1.329(3) . ?
C42 C43 1.386(3) . ?
C43 F7 1.336(3) . ?
C43 C44 1.370(3) . ?
C44 F6 1.346(3) . ?
C45 N2 1.126(4) . ?
C45 C46 1.452(4) . ?
C46 H02A 0.9800 . ?
C46 H02B 0.9800 . ?
C46 H02C 0.9800 . ?
C47 C48 1.427(6) . ?
C47 H02I 0.9800 . ?
C47 H02J 0.9800 . ?
C47 H02K 0.9800 . ?
C48 N1 1.139(6) . ?
C49 C50 1.446(6) . ?
C49 H02D 0.9800 . ?
C49 H02E 0.9800 . ?
C49 H02F 0.9800 . ?
C50 N4 1.126(5) . ?
C51 C52 1.449(7) . ?
C51 H02M 0.9800 . ?
C51 H02N 0.9800 . ?
C51 H02O 0.9800 . ?
C52 N3 1.152(6) . ?
 
loop_
 _geom_angle_atom_site_label_1
 _geom_angle_atom_site_label_2
 _geom_angle_atom_site_label_3
 _geom_angle
 _geom_angle_site_symmetry_1
 _geom_angle_site_symmetry_3
 _geom_angle_publ_flag
Cl1 Sb1 Cl1 180.0 2_656 . ?
Cl1 Sb1 Cl3 91.33(2) 2_656 . ?
Cl1 Sb1 Cl3 88.67(2) . . ?
Cl1 Sb1 Cl3 88.67(2) 2_656 2_656 ?
Cl1 Sb1 Cl3 91.33(2) . 2_656 ?
Cl3 Sb1 Cl3 180.0 . 2_656 ?
Cl1 Sb1 Cl2 89.74(3) 2_656 . ?
Cl1 Sb1 Cl2 90.26(3) . . ?
Cl3 Sb1 Cl2 89.68(2) . . ?
Cl3 Sb1 Cl2 90.32(2) 2_656 . ?
Cl1 Sb1 Cl2 90.27(3) 2_656 2_656 ?
Cl1 Sb1 Cl2 89.73(3) . 2_656 ?
Cl3 Sb1 Cl2 90.32(2) . 2_656 ?
Cl3 Sb1 Cl2 89.68(2) 2_656 2_656 ?
Cl2 Sb1 Cl2 180.0 . 2_656 ?
Cl10 Sb2 Cl10 180.00(4) . 2_766 ?
Cl10 Sb2 Cl6 90.44(2) . . ?
Cl10 Sb2 Cl6 89.56(2) 2_766 . ?
Cl10 Sb2 Cl6 89.56(2) . 2_766 ?
Cl10 Sb2 Cl6 90.44(2) 2_766 2_766 ?
Cl6 Sb2 Cl6 180.0 . 2_766 ?
Cl10 Sb2 Cl7 90.68(2) . . ?
Cl10 Sb2 Cl7 89.32(2) 2_766 . ?
Cl6 Sb2 Cl7 90.55(2) . . ?
Cl6 Sb2 Cl7 89.45(2) 2_766 . ?
Cl10 Sb2 Cl7 89.32(2) . 2_766 ?
Cl10 Sb2 Cl7 90.68(2) 2_766 2_766 ?
Cl6 Sb2 Cl7 89.45(2) . 2_766 ?
Cl6 Sb2 Cl7 90.55(2) 2_766 2_766 ?
Cl7 Sb2 Cl7 180.0 . 2_766 ?
C37 S2 C34 92.97(11) . . ?
C26 S3 C23 92.34(11) . . ?
C12 S4 C15 92.87(11) . . ?
C3 C2 C38 127.5(2) . . ?
C3 C2 C1 110.4(5) . . ?
C38 C2 C1 122.0(5) . . ?
C3 C2 S1' 113.4(2) . . ?
C38 C2 S1' 119.1(2) . . ?
C2 C3 C4 115.7(2) . . ?
C2 C3 H3 122.2 . . ?
C4 C3 H3 122.2 . . ?
C3 C4 C5 128.3(2) . . ?
C3 C4 C1' 108.1(9) . . ?
C5 C4 C1' 123.6(9) . . ?
C3 C4 S1 113.10(18) . . ?
C5 C4 S1 118.56(18) . . ?
O1 C1 C2 130.3(9) . . ?
O1 C1 S1 119.1(7) . . ?
C2 C1 S1 110.5(6) . . ?
C4 S1 C1 90.1(3) . . ?
C2 S1' C1' 92.1(7) . . ?
O1' C1' C4 126(2) . . ?
O1' C1' S1' 123(2) . . ?
C4 C1' S1' 110.4(10) . . ?
C12 C5 C4 124.3(2) . . ?
C12 C5 C6 117.41(19) . . ?
C4 C5 C6 118.2(2) . . ?
C7 C6 C11 117.1(2) . . ?
C7 C6 C5 121.5(2) . . ?
C11 C6 C5 121.4(2) . . ?
F5 C7 C8 118.1(2) . . ?
F5 C7 C6 119.7(2) . . ?
C8 C7 C6 122.2(2) . . ?
F4 C8 C7 120.9(2) . . ?
F4 C8 C9 120.0(2) . . ?
C7 C8 C9 119.2(2) . . ?
F3 C9 C10 120.0(2) . . ?
F3 C9 C8 119.7(2) . . ?
C10 C9 C8 120.3(2) . . ?
F2 C10 C9 120.3(2) . . ?
F2 C10 C11 119.9(2) . . ?
C9 C10 C11 119.8(2) . . ?
F1 C11 C10 118.8(2) . . ?
F1 C11 C6 119.7(2) . . ?
C10 C11 C6 121.5(2) . . ?
C5 C12 C13 127.6(2) . . ?
C5 C12 S4 122.33(17) . . ?
C13 C12 S4 110.10(17) . . ?
C14 C13 C12 113.7(2) . . ?
C14 C13 H01F 123.2 . . ?
C12 C13 H01F 123.2 . . ?
C13 C14 C15 114.2(2) . . ?
C13 C14 H013 122.9 . . ?
C15 C14 H013 122.9 . . ?
C16 C15 C14 126.7(2) . . ?
C16 C15 S4 124.03(17) . . ?
C14 C15 S4 109.06(17) . . ?
C23 C16 C15 124.1(2) . . ?
C23 C16 C17 117.3(2) . . ?
C15 C16 C17 118.26(19) . . ?
C18 C17 C22 116.4(2) . . ?
C18 C17 C16 123.1(2) . . ?
C22 C17 C16 120.5(2) . . ?
F11 C18 C19 118.6(2) . . ?
F11 C18 C17 119.8(2) . . ?
C19 C18 C17 121.6(2) . . ?
F12 C19 C18 120.1(2) . . ?
F12 C19 C20 119.8(2) . . ?
C18 C19 C20 120.1(2) . . ?
F13 C20 C19 120.2(2) . . ?
F13 C20 C21 119.9(2) . . ?
C19 C20 C21 119.9(2) . . ?
F14 C21 C22 120.8(2) . . ?
F14 C21 C20 120.2(2) . . ?
C22 C21 C20 119.0(2) . . ?
F15 C22 C21 118.1(2) . . ?
F15 C22 C17 119.0(2) . . ?
C21 C22 C17 122.9(2) . . ?
C16 C23 C24 127.4(2) . . ?
C16 C23 S3 121.83(17) . . ?
C24 C23 S3 109.42(16) . . ?
C25 C24 C23 113.4(2) . . ?
C25 C24 H01O 123.3 . . ?
C23 C24 H01O 123.3 . . ?
C24 C25 C26 113.2(2) . . ?
C24 C25 H019 123.4 . . ?
C26 C25 H019 123.4 . . ?
C27 C26 C25 127.7(2) . . ?
C27 C26 S3 121.14(18) . . ?
C25 C26 S3 109.92(16) . . ?
C34 C27 C26 124.9(2) . . ?
C34 C27 C28 117.9(2) . . ?
C26 C27 C28 116.9(2) . . ?
C29 C28 C33 117.7(2) . . ?
C29 C28 C27 120.0(2) . . ?
C33 C28 C27 122.2(2) . . ?
F20 C29 C28 120.1(2) . . ?
F20 C29 C30 118.7(2) . . ?
C28 C29 C30 121.1(2) . . ?
F19 C30 C31 120.4(2) . . ?
F19 C30 C29 120.1(3) . . ?
C31 C30 C29 119.5(2) . . ?
F18 C31 C32 120.2(3) . . ?
F18 C31 C30 119.4(3) . . ?
C32 C31 C30 120.4(2) . . ?
F17 C32 C31 120.1(2) . . ?
F17 C32 C33 119.8(3) . . ?
C31 C32 C33 120.1(3) . . ?
F16 C33 C32 118.6(2) . . ?
F16 C33 C28 120.2(2) . . ?
C32 C33 C28 121.2(2) . . ?
C27 C34 C35 126.6(2) . . ?
C27 C34 S2 123.96(17) . . ?
C35 C34 S2 109.15(17) . . ?
C36 C35 C34 114.4(2) . . ?
C36 C35 H01X 122.8 . . ?
C34 C35 H01X 122.8 . . ?
C35 C36 C37 113.4(2) . . ?
C35 C36 H01L 123.3 . . ?
C37 C36 H01L 123.3 . . ?
C38 C37 C36 127.4(2) . . ?
C38 C37 S2 122.46(17) . . ?
C36 C37 S2 110.05(18) . . ?
C37 C38 C2 123.8(2) . . ?
C37 C38 C39 116.74(19) . . ?
C2 C38 C39 119.4(2) . . ?
C44 C39 C40 116.5(2) . . ?
C44 C39 C38 122.3(2) . . ?
C40 C39 C38 121.2(2) . . ?
F10 C40 C41 118.3(2) . . ?
F10 C40 C39 120.2(2) . . ?
C41 C40 C39 121.4(2) . . ?
F9 C41 C42 119.9(2) . . ?
F9 C41 C40 119.7(2) . . ?
C42 C41 C40 120.4(2) . . ?
F8 C42 C41 120.3(2) . . ?
F8 C42 C43 120.1(2) . . ?
C41 C42 C43 119.6(2) . . ?
F7 C43 C44 120.4(2) . . ?
F7 C43 C42 120.2(2) . . ?
C44 C43 C42 119.4(2) . . ?
F6 C44 C43 118.0(2) . . ?
F6 C44 C39 119.4(2) . . ?
C43 C44 C39 122.6(2) . . ?
N2 C45 C46 179.1(4) . . ?
C45 C46 H02A 109.5 . . ?
C45 C46 H02B 109.5 . . ?
H02A C46 H02B 109.5 . . ?
C45 C46 H02C 109.5 . . ?
H02A C46 H02C 109.5 . . ?
H02B C46 H02C 109.5 . . ?
C48 C47 H02I 109.5 . . ?
C48 C47 H02J 109.5 . . ?
H02I C47 H02J 109.5 . . ?
C48 C47 H02K 109.5 . . ?
H02I C47 H02K 109.5 . . ?
H02J C47 H02K 109.5 . . ?
N1 C48 C47 179.5(5) . . ?
C50 C49 H02D 109.5 . . ?
C50 C49 H02E 109.5 . . ?
H02D C49 H02E 109.5 . . ?
C50 C49 H02F 109.5 . . ?
H02D C49 H02F 109.5 . . ?
H02E C49 H02F 109.5 . . ?
N4 C50 C49 178.5(4) . . ?
C52 C51 H02M 109.5 . . ?
C52 C51 H02N 109.5 . . ?
H02M C51 H02N 109.5 . . ?
C52 C51 H02O 109.5 . . ?
H02M C51 H02O 109.5 . . ?
H02N C51 H02O 109.5 . . ?
N3 C52 C51 178.2(6) . . ?
 
_refine_diff_density_max    0.744
_refine_diff_density_min   -0.691
_refine_diff_density_rms    0.089

_shelx_res_file
;

    TR1_a.res created by SHELXL-2014/7

TITL TR1_a.res in P-1
CELL  0.71073  13.5994  14.5227  15.3182   90.915  105.079   92.619
ZERR    2.000   0.0020   0.0020   0.0024    0.004    0.004    0.003
LATT 1
SFAC C  H  O  F  S  Cl Sb N
UNIT 104  38  2  40  8  12  2  8
OMIT 0 1 0
OMIT 0 -1 1
OMIT 0 0 1
OMIT -2 0 1
OMIT -2 1 2
OMIT -2  -1   1
OMIT 2   0   0
OMIT -2   1   0
OMIT -2  -1   2
OMIT 2  -1   1
OMIT 1  -1   3
OMIT 2   1   0
OMIT  0  -1   3
OMIT  -2   1   3
OMIT -2   1   1
OMIT -1  -3   2
OMIT -2  -1   3
OMIT -1   2   3
OMIT -1 0 1
OMIT -1   2   1
OMIT 10  -7   2
OMIT -5   2   0
OMIT 5   0   0
L.S. 15
ACTA
BOND $H
FMAP 2
PLAN 20
DFIX 1.20 C1 O1
DFIX 1.20 C1' O1'
ISOR 0.001 C1 C1'
ISOR 0.001 O1 O1'
TEMP -173.000
WGHT    0.041800    2.636200
FVAR       0.26456
SB1   7    0.500000    0.000000    0.500000    10.50000    0.01423    0.01015 =
         0.02371   -0.00178    0.00704   -0.00098
SB2   7    1.000000    0.500000    0.500000    10.50000    0.00975    0.01431 =
         0.03174    0.00070    0.00599    0.00241
S2    5    0.707408    0.692972    0.436027    11.00000    0.01666    0.01120 =
         0.01340    0.00036    0.00379    0.00045
S3    5    0.635908    0.595186    0.569514    11.00000    0.01124    0.01462 =
         0.01513    0.00061    0.00239    0.00069
S4    5    0.627823    0.467457    0.424661    11.00000    0.01494    0.01310 =
         0.01346    0.00014    0.00313   -0.00061
C2    1    0.691737    0.650575    0.230425    11.00000    0.01516    0.01499 =
         0.01509    0.00123    0.00438    0.00321
C3    1    0.691944    0.567952    0.275734    11.00000    0.01403    0.01388 =
         0.01558    0.00197    0.00606    0.00226
AFIX  43
H3    2    0.725999    0.563173    0.337931    11.00000   -1.20000
AFIX   0
C4    1    0.638772    0.492654    0.223637    11.00000    0.01569    0.01568 =
         0.01502   -0.00007    0.00299    0.00232
PART 1
C1    1    0.641103    0.636048    0.133601    10.70000    0.02834    0.02789 =
         0.02885    0.00091    0.00780    0.00231
O1    3    0.626267    0.690160    0.072414    10.80000    0.03365    0.02365 =
         0.02310    0.00502    0.00402    0.00026
S1    5    0.590407    0.517661    0.110177    10.70000    0.02359    0.01149 =
         0.01194    0.00142    0.00026   -0.00261
PART 2
S1'   5    0.635925    0.639100    0.115318    10.30000    0.03404    0.01477 =
         0.02167   -0.00062   -0.00713    0.00272
O1'   3    0.567045    0.473589    0.059910    10.20000    0.03155    0.02328 =
         0.02436    0.00303    0.00027    0.00152
C1'   1    0.602234    0.523005    0.123592    10.30000    0.02665    0.02620 =
         0.02664    0.00059    0.00659    0.00119
PART 0
C5    1    0.617953    0.404041    0.252378    11.00000    0.01259    0.01420 =
         0.01582   -0.00192    0.00224   -0.00017
C6    1    0.584622    0.328184    0.182428    11.00000    0.01869    0.01085 =
         0.01446    0.00247    0.00216    0.00023
C7    1    0.648649    0.297884    0.132171    11.00000    0.01776    0.01515 =
         0.02115    0.00051    0.00418   -0.00054
C8    1    0.618300    0.229357    0.066074    11.00000    0.02902    0.01600 =
         0.01918    0.00083    0.00707    0.00466
C9    1    0.521197    0.188756    0.049668    11.00000    0.03384    0.01515 =
         0.01679   -0.00289    0.00179   -0.00273
C10   1    0.455581    0.217143    0.097805    11.00000    0.02267    0.02545 =
         0.01965   -0.00203   -0.00065   -0.00995
C11   1    0.487039    0.286244    0.163540    11.00000    0.01974    0.02167 =
         0.01739   -0.00065    0.00505   -0.00191
C12   1    0.621035    0.382939    0.341952    11.00000    0.01373    0.01558 =
         0.01636   -0.00227    0.00289   -0.00188
C13   1    0.616651    0.294849    0.378405    11.00000    0.02006    0.01434 =
         0.02061   -0.00185    0.00579   -0.00499
AFIX  43
H01F  2    0.610661    0.239240    0.343484    11.00000   -1.20000
AFIX   0
C14   1    0.621840    0.296926    0.468983    11.00000    0.02003    0.01302 =
         0.01900    0.00183    0.00465   -0.00429
AFIX  43
H013  2    0.619794    0.242717    0.502500    11.00000   -1.20000
AFIX   0
C15   1    0.630526    0.386953    0.508361    11.00000    0.01132    0.01774 =
         0.01594    0.00140    0.00320   -0.00258
C16   1    0.648003    0.410023    0.600844    11.00000    0.00902    0.01589 =
         0.01724    0.00380    0.00327   -0.00068
C17   1    0.659737    0.333904    0.666016    11.00000    0.01461    0.01436 =
         0.01591   -0.00196    0.00166   -0.00171
C18   1    0.737238    0.272483    0.677644    11.00000    0.01782    0.02179 =
         0.01710   -0.00259    0.00481    0.00228
C19   1    0.744797    0.201644    0.737298    11.00000    0.02247    0.01942 =
         0.01918   -0.00102    0.00230    0.00860
C20   1    0.674447    0.189964    0.787158    11.00000    0.03080    0.01490 =
         0.01525    0.00322    0.00110    0.00186
C21   1    0.597367    0.250509    0.778464    11.00000    0.01971    0.02051 =
         0.01809    0.00225    0.00741   -0.00133
C22   1    0.591757    0.321055    0.719205    11.00000    0.01430    0.01565 =
         0.01782    0.00073    0.00286    0.00127
C23   1    0.665103    0.500701    0.636952    11.00000    0.01230    0.01646 =
         0.01547    0.00262    0.00490    0.00161
C24   1    0.725581    0.530455    0.723864    11.00000    0.01598    0.01759 =
         0.01596    0.00216    0.00472    0.00104
AFIX  43
H01O  2    0.741829    0.491112    0.774007    11.00000   -1.20000
AFIX   0
C25   1    0.758299    0.621714    0.728341    11.00000    0.01640    0.01802 =
         0.01594   -0.00144    0.00307    0.00156
AFIX  43
H019  2    0.799977    0.651635    0.781662    11.00000   -1.20000
AFIX   0
C26   1    0.723683    0.666584    0.645594    11.00000    0.01347    0.01401 =
         0.01609   -0.00207    0.00343    0.00194
C27   1    0.765626    0.747528    0.617611    11.00000    0.01481    0.01226 =
         0.01738   -0.00211    0.00276    0.00266
C28   1    0.827707    0.811649    0.690039    11.00000    0.02488    0.01173 =
         0.01296    0.00014    0.00239    0.00098
C29   1    0.781320    0.858964    0.746356    11.00000    0.02977    0.01373 =
         0.01691    0.00390    0.00532    0.00443
C30   1    0.837348    0.919915    0.813745    11.00000    0.04925    0.01381 =
         0.01560   -0.00041    0.00921    0.00702
C31   1    0.940458    0.933264    0.825049    11.00000    0.04959    0.01695 =
         0.02220   -0.00331   -0.00023   -0.00676
C32   1    0.987985    0.886450    0.771123    11.00000    0.03162    0.02795 =
         0.02775   -0.00356    0.00226   -0.00980
C33   1    0.932188    0.826409    0.703877    11.00000    0.02441    0.02256 =
         0.02064   -0.00269    0.00501   -0.00241
C34   1    0.761986    0.767487    0.527571    11.00000    0.01711    0.01244 =
         0.01629   -0.00100    0.00314    0.00447
C35   1    0.809690    0.844986    0.497028    11.00000    0.01919    0.01203 =
         0.02041   -0.00031    0.00269    0.00092
AFIX  43
H01X  2    0.843168    0.894682    0.536219    11.00000   -1.20000
AFIX   0
C36   1    0.803434    0.842132    0.406626    11.00000    0.01876    0.01171 =
         0.02107    0.00090    0.00431    0.00051
AFIX  43
H01L  2    0.831905    0.889443    0.377146    11.00000   -1.20000
AFIX   0
C37   1    0.750275    0.761630    0.361006    11.00000    0.01475    0.01007 =
         0.01963    0.00354    0.00534    0.00338
C38   1    0.729351    0.738725    0.268257    11.00000    0.01552    0.01137 =
         0.01881    0.00220    0.00560    0.00345
C39   1    0.744363    0.814078    0.207659    11.00000    0.01889    0.01003 =
         0.01579    0.00122    0.00373   -0.00016
C40   1    0.694916    0.896454    0.205940    11.00000    0.02012    0.01483 =
         0.01812    0.00171    0.00628    0.00283
C41   1    0.707249    0.965933    0.148800    11.00000    0.02700    0.01137 =
         0.01897    0.00073    0.00331    0.00418
C42   1    0.767481    0.954784    0.090613    11.00000    0.02891    0.01357 =
         0.01491    0.00379    0.00466   -0.00218
C43   1    0.817074    0.873568    0.090157    11.00000    0.02351    0.01812 =
         0.01707   -0.00276    0.00804   -0.00180
C44   1    0.805567    0.805741    0.148398    11.00000    0.01914    0.01303 =
         0.01735   -0.00066    0.00418    0.00219
C45   1    0.019471    0.733677   -0.042409    11.00000    0.03366    0.03084 =
         0.03135    0.00320    0.00419   -0.00028
C46   1    0.095173    0.779352    0.032275    11.00000    0.03090    0.05279 =
         0.04047   -0.00774    0.00038   -0.01137
AFIX 137
H02A  2    0.156789    0.744050    0.046842    11.00000   -1.50000
H02B  2    0.067714    0.783198    0.085294    11.00000   -1.50000
H02C  2    0.112098    0.841628    0.015087    11.00000   -1.50000
AFIX   0
C47   1    0.934124    0.492139    0.186852    11.00000    0.04562    0.07388 =
         0.06909   -0.01666    0.01608   -0.00003
AFIX 137
H02I  2    0.882611    0.476052    0.130213    11.00000   -1.50000
H02J  2    0.903183    0.527231    0.227053    11.00000   -1.50000
H02K  2    0.960582    0.435635    0.216274    11.00000   -1.50000
AFIX   0
C48   1    1.015632    0.546725    0.167950    11.00000    0.04193    0.07750 =
         0.05793    0.02092    0.01068    0.02423
C49   1    0.879075    0.140853    0.486004    11.00000    0.06269    0.03803 =
         0.07099    0.00461    0.03850    0.00097
AFIX 137
H02D  2    0.894246    0.123560    0.428971    11.00000   -1.50000
H02E  2    0.900762    0.205666    0.501508    11.00000   -1.50000
H02F  2    0.805571    0.132265    0.479358    11.00000   -1.50000
AFIX   0
C50   1    0.933141    0.083415    0.557078    11.00000    0.04396    0.02797 =
         0.07132   -0.00032    0.03248   -0.00601
C51   1    0.775646    0.563823    0.965192    11.00000    0.10307    0.08657 =
         0.06936   -0.00746    0.02364   -0.01234
AFIX 137
H02M  2    0.838273    0.565293    0.944798    11.00000   -1.50000
H02N  2    0.792557    0.578871    1.030159    11.00000   -1.50000
H02O  2    0.729747    0.609062    0.932220    11.00000   -1.50000
AFIX   0
C52   1    0.725897    0.472488    0.948035    11.00000    0.10436    0.07756 =
         0.07458   -0.01656    0.03423   -0.01903
CL1   6    0.463440   -0.067238    0.627247    11.00000    0.04889    0.01852 =
         0.03484    0.00425    0.02244    0.00155
CL2   6    0.674343    0.021914    0.579899    11.00000    0.01624    0.02744 =
         0.04176   -0.01170    0.00206    0.00086
CL3   6    0.468050    0.145421    0.555880    11.00000    0.02128    0.01265 =
         0.03506   -0.00478    0.01196   -0.00041
CL6   6    0.873560    0.404065    0.399340    11.00000    0.01495    0.02141 =
         0.04017   -0.00437    0.00414   -0.00053
CL7   6    0.950706    0.628476    0.407935    11.00000    0.01860    0.01983 =
         0.04130    0.00686    0.00781    0.00475
CL10  6    0.883729    0.534239    0.584356    11.00000    0.01500    0.02817 =
         0.03813   -0.00026    0.01100    0.00553
F1    4    0.420503    0.315550    0.207036    11.00000    0.01875    0.04285 =
         0.02977   -0.01160    0.00962   -0.00753
F2    4    0.360537    0.179663    0.080079    11.00000    0.03016    0.04952 =
         0.03292   -0.01389    0.00469   -0.02330
F3    4    0.491124    0.121945   -0.013980    11.00000    0.04960    0.02576 =
         0.02245   -0.01226    0.00368   -0.00845
F4    4    0.681970    0.200507    0.020174    11.00000    0.03975    0.02972 =
         0.03259   -0.00987    0.01647    0.00623
F5    4    0.743847    0.334918    0.148155    11.00000    0.01860    0.03038 =
         0.03723   -0.00961    0.01201   -0.00414
F6    4    0.855267    0.727921    0.146795    11.00000    0.03138    0.01614 =
         0.03021    0.00323    0.01581    0.00953
F7    4    0.874395    0.861230    0.032537    11.00000    0.03511    0.02459 =
         0.02366    0.00073    0.01725    0.00060
F8    4    0.778173    1.021338    0.034766    11.00000    0.04825    0.01751 =
         0.02053    0.00770    0.01392    0.00003
F9    4    0.658526    1.044233    0.149125    11.00000    0.04743    0.01382 =
         0.03211    0.00862    0.01631    0.01361
F10   4    0.632795    0.908931    0.258917    11.00000    0.03066    0.01839 =
         0.02638    0.00550    0.01607    0.00944
F11   4    0.807076    0.282068    0.630650    11.00000    0.02108    0.03352 =
         0.02750    0.00406    0.01278    0.00855
F12   4    0.821752    0.144552    0.748133    11.00000    0.03224    0.02677 =
         0.02982    0.00302    0.00538    0.01837
F13   4    0.681227    0.121168    0.844403    11.00000    0.04663    0.02213 =
         0.02451    0.01142    0.00909    0.00951
F14   4    0.529373    0.239914    0.826876    11.00000    0.03099    0.03210 =
         0.02838    0.01192    0.01648    0.00249
F15   4    0.515983    0.379106    0.711650    11.00000    0.01722    0.02710 =
         0.02658    0.01021    0.01013    0.00897
F16   4    0.981177    0.780474    0.653179    11.00000    0.01991    0.04030 =
         0.03221   -0.01144    0.00781   -0.00267
F17   4    1.089632    0.898484    0.783699    11.00000    0.03112    0.05571 =
         0.04857   -0.01613    0.00032   -0.01882
F18   4    0.994314    0.991654    0.890168    11.00000    0.06665    0.03354 =
         0.02996   -0.01727   -0.00080   -0.01375
F19   4    0.790835    0.965709    0.866196    11.00000    0.06472    0.02747 =
         0.02171   -0.00534    0.01084    0.01636
F20   4    0.681296    0.847117    0.736058    11.00000    0.02928    0.03066 =
         0.02420   -0.00077    0.00969    0.01018
N1    8    1.081161    0.589870    0.153179    11.00000    0.06077    0.10818 =
         0.11824    0.06857    0.02710    0.03845
N2    8   -0.038865    0.699018   -0.101063    11.00000    0.05203    0.04453 =
         0.03849   -0.00213   -0.00667   -0.00047
N3    8    0.687381    0.399641    0.932439    11.00000    0.16029    0.08882 =
         0.11321   -0.03314    0.05886   -0.04582
N4    8    0.976066    0.037726    0.611099    11.00000    0.04907    0.04485 =
         0.08893    0.01274    0.02616   -0.00527
HKLF 4

REM  TR1_a.res in P-1
REM R1 =  0.0332 for   11971 Fo > 4sig(Fo)  and  0.0446 for all   14497 data
REM    827 parameters refined using     26 restraints

END

WGHT      0.0427      2.5554

REM Highest difference peak  0.744,  deepest hole -0.691,  1-sigma level  0.089
Q1    1   0.5274  0.4750  0.0734  11.00000  0.05    0.74
Q2    1   1.0449  0.4825  0.4656  11.00000  0.05    0.68
Q3    1   0.5017 -0.0230  0.4422  11.00000  0.05    0.67
Q4    1   0.6045  0.4770  0.0517  11.00000  0.05    0.62
Q5    1   0.7409  0.7775  0.2378  11.00000  0.05    0.51
Q6    1   0.7271  0.7245  0.4829  11.00000  0.05    0.50
Q7    1   0.6948  0.3045  0.6714  11.00000  0.05    0.46
Q8    1   0.5791  0.2013  0.0694  11.00000  0.05    0.44
Q9    1   0.7820  0.8026  0.3792  11.00000  0.05    0.43
Q10   1   0.7586  0.8061  0.1694  11.00000  0.05    0.43
Q11   1   0.6380  0.5180  0.1159  11.00000  0.05    0.42
Q12   1   0.7988  0.7782  0.6462  11.00000  0.05    0.41
Q13   1   0.6812  0.6347  0.6149  11.00000  0.05    0.41
Q14   1   0.6391  0.4358  0.3817  11.00000  0.05    0.40
Q15   1   0.6052  0.3119  0.1431  11.00000  0.05    0.40
Q16   1   0.7204  0.6960  0.2510  11.00000  0.05    0.40
Q17   1   0.6731  0.6453  0.1889  11.00000  0.05    0.40
Q18   1   0.8859  0.5065  0.5248  11.00000  0.05    0.40
Q19   1   0.7812  0.8573  0.4472  11.00000  0.05    0.39
Q20   1   0.6241  0.5628  0.5123  11.00000  0.05    0.39
;
_shelx_res_checksum   31579

_shelx_hkl_file
;
  -2   0   0    7.70    0.70
   2   0   0    9.90    1.00
   2   0   0    7.80    0.60
   2   0   0    8.40    1.10
   2   0   0   10.30    1.20
   2   0   0    8.10    1.10
  -3   0   0 1514.45   50.39
   3   0   0 1622.44   51.39
   3   0   0 1574.14   50.49
   3   0   0 1606.94   51.09
   3   0   0 1536.45   51.39
   3   0   0 1600.84   51.39
   4   0   0   62.69    2.60
   4   0   0   69.09    3.50
   4   0   0   61.39    3.80
   4   0   0   63.19    3.80
   4   0   0   61.29    3.80
   5   0   0  142.99    6.20
   6   0   0 1510.55   50.29
   6   0   0 1479.75   50.29
   6   0   0 1427.76   50.29
   6   0   0 1526.65   48.40
   6   0   0 1572.24   49.80
   7   0   0  352.06   14.20
   7   0   0  352.36   11.80
   7   0   0  345.07   14.10
   7   0   0  357.96   14.10
   7   0   0  352.46   13.30
   8   0   0 1109.29   38.60
   8   0   0 1132.89   39.90
   8   0   0 1158.68   36.90
   8   0   0 1139.89   39.70
   8   0   0 1163.68   39.70
   9   0   0    4.50    2.20
   9   0   0   -0.60    2.00
   9   0   0   -0.30    1.80
   9   0   0   -0.90    1.30
  10   0   0  161.88    9.30
  10   0   0  169.08    9.30
  10   0   0  163.78    8.10
  10   0   0  167.28    9.30
  11   0   0   13.80    3.70
  11   0   0   17.10    3.70
  11   0   0   14.90    3.60
  11   0   0   18.40    3.10
  12   0   0   -2.30    2.50
  12   0   0    0.20    2.80
  12   0   0    1.60    2.60
  12   0   0    0.10    1.80
  13   0   0   -0.60    2.80
  13   0   0    1.00    3.00
  13   0   0   -3.50    2.80
  13   0   0   -0.70    2.00
  14   0   0   21.20    4.80
  14   0   0   15.90    4.50
  14   0   0   20.20    4.90
  15   0   0   -1.90    3.50
  15   0   0   -0.60    3.40
  15   0   0    2.00    3.60
  16   0   0  259.77   15.40
  16   0   0  243.68   14.80
  16   0   0  257.77   15.60
  17   0   0   63.49    8.90
  17   0   0   65.29    9.90
  17   0   0   75.19    9.30
  17  -1   0  168.48   12.70
  17  -1   0  159.38   13.30
  17  -1   0  159.38   13.80
  16  -1   0  220.78   14.70
  16  -1   0  217.98   13.50
  16  -1   0  213.58   14.50
  15  -1   0    1.50    3.30
  15  -1   0    4.90    3.90
  15  -1   0    0.50    3.40
  14  -1   0   15.10    4.40
  14  -1   0   22.70    5.30
  14  -1   0   23.70    5.20
  13  -1   0  109.09    8.40
  13  -1   0   83.29    8.40
  13  -1   0  117.89    9.10
  12  -1   0  132.09    7.20
  12  -1   0  140.69    9.50
  12  -1   0  138.09    9.40
  12  -1   0  139.29    9.00
  11  -1   0  172.88    9.70
  11  -1   0  152.18    9.70
  11  -1   0  166.18    8.00
  11  -1   0  163.48    9.90
  10  -1   0    5.40    2.50
  10  -1   0    8.50    3.00
  10  -1   0    8.50    2.00
  10  -1   0    6.40    2.50
   9  -1   0   18.30    2.50
   9  -1   0   16.40    3.00
   9  -1   0   15.30    3.40
   9  -1   0   17.00    3.40
   8  -1   0  228.38   11.00
   8  -1   0  258.27   11.40
   8  -1   0  254.87   11.00
   8  -1   0  246.48   10.00
   7  -1   0  136.79    6.30
   7  -1   0  139.89    7.40
   7  -1   0  149.59    7.20
   7  -1   0  143.59    7.50
   6  -1   0  662.93   24.10
   6  -1   0  684.13   23.70
   6  -1   0  674.13   24.10
   6  -1   0  677.93   23.10
   5  -1   0   84.09    4.10
   5  -1   0   81.99    4.60
   5  -1   0   83.49    4.50
   5  -1   0   81.79    4.90
   4  -1   0 1507.95   49.20
   4  -1   0 1470.15   49.60
   4  -1   0 1527.85   48.90
   4  -1   0 1506.35   49.50
   3  -1   0 5168.28  165.58
   3  -1   0 5130.89  165.38
   3  -1   0 5191.28  165.48
   3  -1   0 5170.88  165.28
   2  -1   0  172.18    5.90
   2  -1   0  183.48    6.30
   2  -1   0  177.38    6.50
   2  -1   0  179.88    6.60
   2  -1   0  176.98    6.30
   1  -1   0   54.59    2.00
   1  -1   0   55.59    2.40
   1  -1   0   56.39    2.30
   1  -1   0   55.39    2.20
   1  -1   0   55.49    2.30
   1  -1   0   53.19    2.10
  -1   1   0   52.49    2.00
  -1   1   0   53.89    2.30
  -1   1   0   50.39    2.00
  -1   1   0   55.29    2.10
   0   1   0    5.40    0.40
  -1  -1   0  930.51   28.40
  -1  -1   0  769.52   28.50
   1   1   0  888.21   28.10
   1   1   0  915.21   28.30
   1   1   0  829.12   28.30
   1   1   0  956.30   28.70
   1   1   0  888.61   28.40
   1   1   0  895.71   28.30
   1   1   0  804.52   28.30
  -2  -1   0  326.47   11.30
  -2  -1   0  337.67   11.60
   2   1   0  335.27   11.90
   2   1   0  340.37   11.60
   2   1   0  350.66   11.70
   2   1   0  341.67   12.00
   2   1   0  373.76   12.10
   2   1   0  344.67   11.60
   2   1   0  365.86   11.60
   3   1   0  734.83   23.50
   3   1   0  709.13   23.80
   3   1   0  703.33   23.70
   3   1   0  681.33   23.60
   3   1   0  679.23   23.00
   3   1   0  709.33   23.00
   4   1   0 1388.26   45.50
   4   1   0 1422.56   46.50
   4   1   0 1404.56   46.50
   4   1   0 1427.06   46.70
   4   1   0 1428.86   46.80
   4   1   0 1411.76   45.70
   5   1   0 1517.05   53.19
   5   1   0 1626.04   53.09
   5   1   0 1622.24   53.39
   5   1   0 1654.43   52.99
   5   1   0 1614.44   51.99
   6   1   0  468.15   15.80
   6   1   0  451.55   17.40
   6   1   0  477.85   17.30
   6   1   0  473.75   17.60
   6   1   0  471.85   17.10
   7   1   0 1052.79   35.10
   7   1   0 1044.60   33.60
   7   1   0 1040.50   35.70
   7   1   0  948.81   35.40
   7   1   0 1026.50   35.40
   8   1   0 1052.49   35.30
   8   1   0  992.80   35.90
   8   1   0 1011.50   33.40
   8   1   0 1036.20   35.80
   8   1   0 1002.10   35.90
   9   1   0   25.70    3.60
   9   1   0   25.60    1.90
   9   1   0   21.80    3.70
   9   1   0   20.80    3.10
   9   1   0   26.50    4.00
  10   1   0    9.10    2.40
  10   1   0    5.10    2.80
  10   1   0   12.30    1.40
  10   1   0    4.50    2.50
  10   1   0    5.80    2.90
  11   1   0  216.98   11.60
  11   1   0  222.48   11.90
  11   1   0  224.88   10.50
  11   1   0  208.98   11.30
  12   1   0   87.79    7.60
  12   1   0  101.49    6.70
  12   1   0   86.89    7.60
  12   1   0  103.79    8.30
  13   1   0   68.89    7.70
  13   1   0   51.49    5.50
  13   1   0   66.39    7.40
  13   1   0   62.89    6.80
  14   1   0  128.79    9.80
  14   1   0  112.59    7.60
  14   1   0  120.19    9.50
  14   1   0  109.99    8.90
  15   1   0   12.20    4.80
  15   1   0   23.40    5.10
  15   1   0   18.60    3.60
  15   1   0    5.60    4.10
  16   1   0   -3.10    3.60
  16   1   0    1.40    4.50
  16   1   0    1.70    3.80
  17   1   0  182.68   13.40
  17   1   0  160.58   13.20
  17   1   0  181.78   13.40
  17  -2   0   51.99    8.40
  17  -2   0   40.90    8.00
  17  -2   0   38.70    7.00
  16  -2   0  328.47   18.20
  16  -2   0  326.27   18.30
  16  -2   0  325.17   17.10
  15  -2   0   -4.70    2.90
  15  -2   0   -3.90    2.80
  15  -2   0   -8.80    2.50
  14  -2   0   92.79    8.60
  14  -2   0   97.49    9.50
  14  -2   0   95.99    9.70
  13  -2   0   10.80    3.80
  13  -2   0    6.00    3.10
  13  -2   0    0.70    3.10
  12  -2   0   79.09    7.90
  12  -2   0   70.79    7.50
  12  -2   0   66.69    6.60
  11  -2   0   20.10    2.70
  11  -2   0   12.70    3.90
  11  -2   0   13.10    3.60
  11  -2   0   20.10    3.80
  10  -2   0  124.59    7.40
  10  -2   0  126.69    8.30
  10  -2   0  121.39    6.30
  10  -2   0  134.79    8.20
   9  -2   0  547.25   19.60
   9  -2   0  532.75   21.40
   9  -2   0  559.54   20.80
   9  -2   0  550.74   21.40
   8  -2   0  184.88    8.70
   8  -2   0  181.58    7.80
   8  -2   0  193.28    9.40
   8  -2   0  180.08    9.10
   7  -2   0  196.68    7.90
   7  -2   0  198.38    9.10
   7  -2   0  188.28    8.60
   7  -2   0  193.78    9.40
   6  -2   0  952.00   32.10
   6  -2   0  943.91   32.50
   6  -2   0  930.11   31.40
   6  -2   0  940.71   32.80
   5  -2   0  519.85   17.90
   4  -2   0  726.23   24.60
   4  -2   0  727.63   25.00
   4  -2   0  726.13   25.30
   4  -2   0  758.22   24.50
   4  -2   0  715.23   25.10
   3  -2   0  445.36   15.40
   3  -2   0  461.85   15.30
   3  -2   0  461.25   15.80
   3  -2   0  439.16   15.90
   3  -2   0  451.15   15.60
  -3   2   0  451.95   14.80
   2  -2   0 1233.78   41.00
   2  -2   0 1221.98   40.80
   2  -2   0 1242.38   40.70
   2  -2   0 1268.57   40.40
   2  -2   0 1285.17   40.90
  -2   2   0 1260.07   40.40
   1  -2   0  725.83   22.50
   1  -2   0  694.13   23.00
   1  -2   0  660.93   22.60
   1  -2   0  749.13   22.60
   1  -2   0  682.23   22.60
   1  -2   0  702.33   22.90
  -1   2   0  656.83   22.60
  -1   2   0  685.73   22.70
   0  -2   0  304.37   10.50
   0  -2   0  295.17   10.30
   0  -2   0  327.27   11.20
   0  -2   0  319.07   10.80
   0  -2   0  323.57   10.50
   0   2   0  310.57   10.40
   0   2   0  326.07   10.80
   0   2   0  370.56   11.30
   0   2   0  296.47   10.40
   0   2   0  307.57   10.80
  -1  -2   0    0.50    0.90
  -1  -2   0    1.20    0.80
   1   2   0    0.80    0.60
   1   2   0    1.20    0.90
   1   2   0    1.60    0.60
   1   2   0    1.40    0.90
   1   2   0    0.20    0.80
   1   2   0    0.80    0.70
  -2  -2   0  886.41   31.60
  -2  -2   0  980.30   31.20
   2   2   0  933.91   30.70
   2   2   0  953.70   31.10
   2   2   0  998.40   31.70
   2   2   0  946.11   31.10
   2   2   0  955.80   31.10
   2   2   0  934.81   31.30
  -3  -2   0  212.58    7.80
   3   2   0  210.38    7.70
   3   2   0  193.48    7.70
   3   2   0  222.08    8.50
   3   2   0  217.78    7.70
   3   2   0  208.18    8.00
   3   2   0  194.88    8.10
   3   2   0  208.88    7.60
   4   2   0  803.72   27.20
   4   2   0  809.42   26.90
   4   2   0  797.62   27.60
   4   2   0  811.22   26.90
   4   2   0  839.12   26.90
   4   2   0  785.62   27.80
   4   2   0  842.42   28.00
   5   2   0   35.20    2.50
   5   2   0   36.30    3.00
   5   2   0   32.10    3.30
   5   2   0   34.70    2.30
   5   2   0   31.80    2.30
   6   2   0  259.07   10.60
   6   2   0  243.98   10.70
   6   2   0  238.98   10.00
   6   2   0  243.98    9.20
   6   2   0  254.37   10.60
   7   2   0   11.10    2.50
   7   2   0   11.60    2.30
   7   2   0   12.20    1.60
   7   2   0   12.50    2.50
   7   2   0    9.70    2.40
   8   2   0  529.95   20.30
   8   2   0  515.05   19.70
   8   2   0  540.85   19.90
   8   2   0  518.15   18.10
   8   2   0  515.55   20.20
   9   2   0    6.80    2.40
   9   2   0    4.80    2.30
   9   2   0    5.30    2.20
   9   2   0    7.30    1.50
   9   2   0    6.60    2.80
  10   2   0  355.66   15.20
  10   2   0  366.66   15.90
  10   2   0  340.97   14.80
  10   2   0  358.46   15.90
  10   2   0  355.86   12.80
  11   2   0   88.89    7.30
  11   2   0   90.59    7.50
  11   2   0   81.79    4.20
  11   2   0   91.89    6.70
  11   2   0   77.39    6.20
  12   2   0   60.59    6.20
  12   2   0   62.99    7.10
  12   2   0   61.59    7.10
  12   2   0   62.19    5.80
  13   2   0    6.50    2.60
  13   2   0    9.10    3.80
  13   2   0    8.50    3.40
  13   2   0   -0.90    3.20
  14   2   0  221.08   12.50
  14   2   0  220.58   13.40
  14   2   0  201.58   11.00
  14   2   0  227.18   13.30
  15   2   0    4.70    4.50
  15   2   0   -2.60    2.10
  15   2   0   -0.40    3.60
  15   2   0   -0.20    3.30
  16   2   0   28.70    5.90
  16   2   0   28.00    6.40
  16   2   0   27.30    7.10
  16   2   0   23.30    4.10
  17   2   0    9.00    6.30
  17   2   0   17.90    5.60
  17   2   0   12.10    5.90
  17  -3   0  122.09   10.40
  17  -3   0  131.79   13.10
  17  -3   0  125.99   12.50
  16  -3   0   81.49    9.70
  16  -3   0   58.39    8.10
  16  -3   0   72.89    8.20
  15  -3   0  228.28   14.00
  15  -3   0  213.08   12.50
  15  -3   0  204.88   13.70
  14  -3   0   20.60    5.00
  14  -3   0   20.50    4.40
  14  -3   0   16.00    4.80
  13  -3   0  158.88   10.60
  13  -3   0  178.18   10.20
  13  -3   0  180.98   11.60
  12  -3   0    4.40    2.70
  12  -3   0    0.40    2.90
  12  -3   0   -0.30    2.90
  11  -3   0  313.37   14.20
  11  -3   0  324.57   15.10
  11  -3   0  320.37   15.50
  10  -3   0   65.99    5.70
  10  -3   0   70.59    5.30
  10  -3   0   74.19    6.60
   9  -3   0  645.54   25.40
   9  -3   0  677.43   24.30
   9  -3   0  675.33   25.10
   9  -3   0  646.34   23.00
   8  -3   0   -1.70    1.90
   8  -3   0   -1.00    1.90
   8  -3   0    0.10    1.10
   8  -3   0    0.00    1.50
   7  -3   0  233.18    9.60
   7  -3   0  232.58   10.70
   7  -3   0  226.98    9.10
   7  -3   0  230.08   10.30
   6  -3   0   28.60    2.90
   6  -3   0   29.80    3.60
   6  -3   0   24.30    3.10
   6  -3   0   35.60    2.70
   5  -3   0  187.58    7.60
   5  -3   0  193.08    8.30
   5  -3   0  199.08    8.20
   5  -3   0  189.58    8.60
   5  -3   0  186.58    7.50
   4  -3   0   57.09    3.60
   4  -3   0   61.79    3.40
   4  -3   0   59.89    3.80
   4  -3   0   57.79    3.10
   4  -3   0   62.39    3.50
   4  -3   0   60.29    4.10
  -4   3   0   58.69    2.80
   3  -3   0    7.20    1.70
   3  -3   0    6.50    1.20
   3  -3   0    5.10    1.50
   3  -3   0    5.40    1.80
   3  -3   0    6.40    1.50
  -3   3   0    5.80    1.30
   2  -3   0  131.09    5.60
   2  -3   0  129.69    4.50
   2  -3   0  136.19    4.90
   2  -3   0  132.39    4.90
   2  -3   0  128.39    5.60
   2  -3   0  132.79    5.10
   2  -3   0  129.79    5.30
  -2   3   0  125.59    4.50
  -2   3   0  132.89    5.20
   1  -3   0  838.92   27.80
   1  -3   0  824.12   28.00
   1  -3   0  867.61   28.50
   1  -3   0  851.41   27.90
   1  -3   0  911.11   28.00
  -1   3   0  835.72   28.00
  -1   3   0  827.12   28.00
   0  -3   0   85.69    4.20
   0  -3   0  104.19    4.40
   0  -3   0  119.89    5.00
   0   3   0   88.99    3.80
  -1  -3   0 1156.78   37.70
  -1  -3   0  988.20   38.10
   1   3   0 1194.78   37.50
   1   3   0 1083.69   37.70
   1   3   0 1185.48   37.70
   1   3   0 1197.68   37.10
   1   3   0 1240.98   38.40
  -2  -3   0    1.50    1.30
  -2  -3   0    4.40    1.30
   2   3   0    4.10    1.20
   2   3   0    4.70    1.30
   2   3   0    4.90    1.10
   2   3   0    4.80    0.70
   2   3   0    5.60    1.20
   2   3   0    5.80    1.70
  -3  -3   0  124.49    5.60
   3   3   0  132.39    6.30
   3   3   0  126.49    5.50
   3   3   0  121.69    5.50
   3   3   0  135.29    5.90
   3   3   0  126.89    4.90
   3   3   0  129.49    5.40
   3   3   0  126.99    5.40
  -4  -3   0  357.06   12.40
   4   3   0  337.57   13.20
   4   3   0  332.77   12.10
   4   3   0  323.97   12.10
   4   3   0  316.47   12.80
   4   3   0  341.57   12.60
   4   3   0  347.07   12.00
   4   3   0  343.17   12.30
  -5  -3   0   62.59    3.90
   5   3   0   69.89    3.90
   5   3   0   65.29    3.50
   5   3   0   69.09    4.60
   5   3   0   64.89    3.70
   5   3   0   65.09    4.70
   5   3   0   63.59    3.70
   5   3   0   66.09    4.30
   6   3   0  303.77   11.50
   6   3   0  296.17   12.30
   6   3   0  297.07   11.10
   6   3   0  290.67   10.90
   6   3   0  274.77   11.90
   6   3   0  302.97   10.80
   6   3   0  307.37   12.40
   7   3   0  191.28    9.30
   7   3   0  190.68    7.20
   7   3   0  183.68    7.60
   7   3   0  185.98    8.30
   7   3   0  180.68    8.90
   7   3   0  178.18    7.20
   7   3   0  192.28    9.10
   8   3   0    5.30    2.20
   8   3   0    9.00    2.70
   8   3   0    6.80    2.30
   8   3   0   11.90    2.40
   8   3   0    8.00    1.60
   9   3   0  222.68   11.20
   9   3   0  205.78   10.60
   9   3   0  221.28   10.20
   9   3   0  220.58    8.90
   9   3   0  227.28   10.70
  10   3   0   -0.20    1.20
  10   3   0    1.00    2.50
  10   3   0   -1.10    2.30
  10   3   0    0.00    1.90
  10   3   0    2.70    2.30
  11   3   0  518.75   21.00
  11   3   0  540.15   18.80
  11   3   0  532.75   22.10
  11   3   0  512.75   22.00
  11   3   0  535.65   21.30
  12   3   0    2.80    2.50
  12   3   0    1.30    3.00
  12   3   0    1.20    2.40
  12   3   0    0.00    3.00
  13   3   0  111.69    8.40
  13   3   0  115.49    8.40
  13   3   0  129.79    9.20
  13   3   0  125.69    9.70
  14   3   0   58.79    7.50
  14   3   0   71.09    7.30
  14   3   0   68.29    6.90
  14   3   0   51.79    7.40
  15   3   0  110.89    8.20
  15   3   0   94.99   10.20
  15   3   0   94.49   10.00
  15   3   0  117.49    9.20
  16   3   0   -1.00    3.80
  16   3   0    7.40    5.40
  16   3   0    1.10    4.40
  16   3   0    1.80    2.90
  17   3   0   70.59    8.50
  17   3   0   60.69    6.50
  17   3   0   74.79    9.90
  17   3   0   58.79    9.30
  17  -4   0    7.50    6.10
  17  -4   0   10.10    4.60
  17  -4   0    5.80    5.90
  16  -4   0   -0.50    4.50
  16  -4   0   -4.00    3.60
  16  -4   0   -2.20    4.10
  15  -4   0   46.40    6.90
  15  -4   0   39.50    6.90
  15  -4   0   52.89    6.50
  14  -4   0  227.98   13.40
  14  -4   0  201.48   11.50
  14  -4   0  212.58   13.50
  13  -4   0   65.59    6.60
  13  -4   0   62.09    7.50
  13  -4   0   75.79    8.00
  12  -4   0  238.38   11.60
  12  -4   0  224.48   12.50
  12  -4   0  250.17   13.60
  11  -4   0    6.30    3.00
  11  -4   0    4.10    2.60
  11  -4   0    2.70    3.20
  10  -4   0  270.67   12.50
  10  -4   0  232.38   12.50
  10  -4   0  253.97   11.30
   9  -4   0   34.70    3.80
   9  -4   0   42.00    5.30
   9  -4   0   38.70    3.20
   9  -4   0   38.70    4.60
   8  -4   0 1334.07   45.00
   8  -4   0 1277.57   44.20
   8  -4   0 1264.37   43.20
   8  -4   0 1286.97   42.70
   8  -4   0 1237.28   42.70
   7  -4   0   64.69    4.10
   7  -4   0   58.79    3.90
   7  -4   0   63.39    5.30
   7  -4   0   66.89    4.70
   7  -4   0   58.79    3.80
   6  -4   0    4.70    1.70
   6  -4   0    1.60    1.20
   6  -4   0    6.00    1.40
   6  -4   0    4.30    1.90
   6  -4   0   -1.30    1.70
   6  -4   0    1.70    1.20
   5  -4   0  104.39    4.80
   5  -4   0  111.09    5.30
   5  -4   0  116.79    5.70
   5  -4   0  112.29    5.80
   5  -4   0  107.29    5.30
   5  -4   0  118.19    6.30
  -5   4   0  113.39    4.60
   4  -4   0 2122.09   69.99
   4  -4   0 2155.78   69.09
   4  -4   0 2126.39   70.09
   4  -4   0 2148.89   70.59
   4  -4   0 2162.58   69.89
  -4   4   0 2157.88   69.29
   3  -4   0  126.69    5.80
   3  -4   0  133.29    4.80
   3  -4   0  138.99    5.50
   3  -4   0  129.39    6.10
   3  -4   0  136.09    6.10
  -3   4   0  138.09    5.50
   2  -4   0  232.88    8.40
   2  -4   0  236.38    8.40
   2  -4   0  223.08    8.50
   2  -4   0  235.88    8.30
   2  -4   0  232.08    9.00
   2  -4   0  232.68    9.30
  -2   4   0  227.88    8.70
  -2   4   0  242.38    9.10
   1  -4   0   17.60    2.10
   1  -4   0   27.00    2.20
   1  -4   0   22.20    1.80
   1  -4   0   22.60    2.10
   1  -4   0   24.70    2.30
  -1   4   0   21.00    2.10
  -1   4   0   21.40    1.20
  -1   4   0   26.10    2.30
   0  -4   0  282.77    9.80
   0  -4   0  299.27   10.60
   0  -4   0  281.47   11.20
   0  -4   0  275.47    9.50
   0  -4   0  285.17   10.60
   0   4   0  284.47   10.60
   0   4   0  288.77    9.90
   0   4   0  290.67   10.60
  -1  -4   0   70.49    3.90
   1   4   0   65.89    3.80
   1   4   0   59.99    3.50
   1   4   0   61.79    2.50
   1   4   0   67.09    3.30
   1   4   0   63.99    4.30
   1   4   0   69.69    2.90
  -2  -4   0  118.49    5.50
  -2  -4   0  122.59    6.30
   2   4   0  114.79    4.80
   2   4   0  123.29    5.40
   2   4   0  121.89    6.10
   2   4   0  117.09    5.30
   2   4   0  106.89    5.40
  -3  -4   0  264.77   10.40
  -3  -4   0  282.87   11.60
   3   4   0  280.47   10.60
   3   4   0  272.07   10.40
   3   4   0  267.87    9.20
   3   4   0  268.57    9.00
   3   4   0  264.07   10.00
   3   4   0  270.37   10.30
   3   4   0  272.77   11.20
  -4  -4   0  470.45   15.60
   4   4   0  432.66   15.20
   4   4   0  407.46   15.20
   4   4   0  423.86   14.50
   4   4   0  415.56   15.30
   4   4   0  404.16   16.20
   4   4   0  408.66   15.70
   4   4   0  406.86   15.20
  -5  -4   0  429.76   15.90
   5   4   0  440.46   15.70
   5   4   0  462.05   17.10
   5   4   0  449.46   15.60
   5   4   0  417.66   15.20
   5   4   0  434.96   16.10
   5   4   0  402.96   16.40
   5   4   0  426.36   15.70
  -6  -4   0  179.58    8.40
   6   4   0  200.88    7.90
   6   4   0  189.58    8.70
   6   4   0  190.78    8.00
   6   4   0  200.48    8.00
   6   4   0  194.18    8.10
   6   4   0  193.58    9.30
   6   4   0  178.28    9.10
  -7  -4   0  230.88   10.50
   7   4   0  248.18   11.10
   7   4   0  242.68    9.30
   7   4   0  231.28   10.50
   7   4   0  220.38   10.80
   7   4   0  227.18    9.50
   7   4   0  234.18    9.70
   7   4   0  230.68    9.10
   8   4   0   35.30    3.20
   8   4   0   23.30    3.70
   8   4   0   29.10    3.80
   8   4   0   29.60    3.30
   8   4   0   34.70    4.10
   8   4   0   32.60    2.60
   8   4   0   30.20    2.70
   9   4   0  105.69    5.60
   9   4   0  109.49    7.30
   9   4   0  112.79    6.40
   9   4   0  102.49    7.40
   9   4   0  105.29    7.20
  10   4   0  406.76   17.20
  10   4   0  385.56   16.10
  10   4   0  392.06   17.50
  10   4   0  388.56   14.90
  10   4   0  406.06   17.20
  11   4   0   42.00    3.50
  11   4   0   34.30    4.40
  11   4   0   34.50    5.50
  11   4   0   37.90    5.00
  11   4   0   35.20    5.20
  12   4   0  568.84   22.50
  12   4   0  552.14   22.90
  12   4   0  556.94   23.90
  12   4   0  574.44   23.70
  13   4   0   75.29    8.40
  13   4   0   90.99    8.80
  13   4   0  102.29    8.10
  13   4   0  100.19    7.40
  14   4   0    0.90    3.70
  14   4   0    8.20    4.40
  14   4   0    5.10    2.80
  14   4   0    1.90    3.10
  15   4   0    0.50    3.50
  15   4   0   -0.60    3.00
  15   4   0    0.70    2.80
  15   4   0   -1.90    3.70
  16   4   0   67.69    7.90
  16   4   0   76.29   10.00
  16   4   0   61.59    8.80
  16   4   0   83.19    8.10
  17  -5   0  103.89   11.80
  17  -5   0  121.89   12.70
  16  -5   0    1.40    5.00
  16  -5   0    1.50    3.60
  16  -5   0    6.70    4.80
  15  -5   0   44.00    6.00
  15  -5   0   43.00    7.30
  15  -5   0   34.60    6.20
  14  -5   0   14.10    5.00
  14  -5   0   15.70    4.90
  14  -5   0    9.50    3.60
  13  -5   0   26.20    5.40
  13  -5   0   41.00    5.10
  13  -5   0   52.69    6.80
  12  -5   0    1.70    3.40
  12  -5   0    3.30    2.40
  12  -5   0    5.20    3.30
  11  -5   0  465.35   18.80
  11  -5   0  488.95   20.40
  11  -5   0  491.85   21.20
   9  -5   0   77.99    4.60
   9  -5   0   80.09    5.00
   9  -5   0   73.09    4.60
   9  -5   0   59.69    6.30
   9  -5   0   71.79    5.80
   8  -5   0  191.58    8.30
   8  -5   0  190.18   10.00
   8  -5   0  199.48    8.30
   8  -5   0  182.88    8.30
   8  -5   0  187.88    9.30
   7  -5   0 2587.04   83.89
   7  -5   0 2647.44   84.99
   7  -5   0 2493.05   83.09
   7  -5   0 2540.45   82.69
   7  -5   0 2457.35   82.99
   6  -5   0    0.30    1.60
   6  -5   0    1.60    1.10
   6  -5   0    1.10    1.60
   6  -5   0    1.90    2.00
   6  -5   0    0.80    1.20
   6  -5   0    2.40    1.50
  -6   5   0   -2.00    0.90
   5  -5   0  444.86   16.30
   5  -5   0  412.76   16.10
   5  -5   0  433.06   15.00
   5  -5   0  452.95   16.90
   5  -5   0  452.45   16.10
  -5   5   0  440.56   15.30
   4  -5   0    6.00    1.90
   4  -5   0    2.20    1.40
   4  -5   0    1.70    1.30
   4  -5   0    3.60    1.60
   4  -5   0    4.60    0.80
  -4   5   0    0.70    1.20
   3  -5   0 1161.08   37.90
   3  -5   0 1187.38   37.60
   3  -5   0 1140.99   38.30
   3  -5   0 1155.88   37.60
   3  -5   0 1177.68   39.00
   3  -5   0 1124.69   38.70
  -3   5   0 1123.09   38.10
   2  -5   0  163.98    6.50
   2  -5   0  170.58    6.60
   2  -5   0  168.68    7.00
   2  -5   0  159.38    6.50
   2  -5   0  177.48    7.70
   2  -5   0  162.18    6.10
  -2   5   0  156.98    6.80
  -2   5   0  158.88    6.80
   1  -5   0  455.75   15.50
   1  -5   0  439.06   15.80
   1  -5   0  420.86   15.70
   1  -5   0  484.75   16.90
  -1   5   0  433.26   15.90
  -1   5   0  448.96   14.80
  -1   5   0  460.15   16.00
   0  -5   0   10.50    2.10
   0  -5   0   16.80    1.60
   0  -5   0   13.90    1.20
   0  -5   0   16.70    2.20
   0  -5   0   13.20    1.80
   0   5   0   13.30    1.50
  -1  -5   0    1.80    1.60
  -1  -5   0    0.60    1.20
   1   5   0    1.90    1.10
   1   5   0    0.60    0.70
   1   5   0    1.60    1.30
   1   5   0    1.70    1.40
   1   5   0    0.90    0.60
  -2  -5   0  615.04   23.20
  -2  -5   0  659.73   22.30
   2   5   0  642.84   22.30
   2   5   0  622.24   21.90
   2   5   0  638.54   21.30
   2   5   0  625.14   23.20
   2   5   0  654.83   22.20
  -3  -5   0   39.10    4.10
  -3  -5   0   33.70    3.40
   3   5   0   36.20    3.10
   3   5   0   35.90    2.70
   3   5   0   30.50    2.90
   3   5   0   34.50    3.20
   3   5   0   41.50    4.50
   3   5   0   32.10    3.10
  -4  -5   0  129.29    6.20
   4   5   0  122.19    6.10
   4   5   0  123.49    5.80
   4   5   0  117.29    5.80
   4   5   0  119.99    5.90
   4   5   0  123.09    4.70
   4   5   0  113.89    6.80
   4   5   0  116.59    6.30
  -5  -5   0  208.28    9.20
   5   5   0  203.38    7.90
   5   5   0  205.98    9.50
   5   5   0  217.88    9.00
   5   5   0  208.58   10.10
   5   5   0  210.38    8.70
   5   5   0  222.58    9.10
   5   5   0  204.38    8.90
  -6  -5   0  337.57   13.80
   6   5   0  359.86   15.00
   6   5   0  353.86   13.90
   6   5   0  372.36   12.90
   6   5   0  356.16   13.60
   6   5   0  347.37   13.50
   6   5   0  346.27   13.30
   6   5   0  348.27   14.60
  -7  -5   0   62.89    4.70
   7   5   0   61.49    4.20
   7   5   0   57.39    4.60
   7   5   0   62.39    5.50
   7   5   0   57.19    3.80
   7   5   0   63.39    4.30
   7   5   0   61.29    5.30
   7   5   0   59.99    3.90
  -8  -5   0   17.30    2.80
   8   5   0   16.10    2.60
   8   5   0   19.80    2.50
   8   5   0   14.70    2.10
   8   5   0   23.90    3.60
   8   5   0   17.30    2.60
   8   5   0   16.50    3.10
   8   5   0   14.40    3.40
   9   5   0    3.90    1.80
   9   5   0    3.60    1.90
   9   5   0    3.30    2.40
   9   5   0    5.60    2.60
   9   5   0    3.10    2.10
   9   5   0    1.70    1.40
   9   5   0    2.50    1.30
  10   5   0  325.17   15.00
  10   5   0  310.37   14.60
  10   5   0  325.67   15.50
  10   5   0  319.67   13.50
  10   5   0  311.07   12.90
  11   5   0   79.89    5.20
  11   5   0   77.09    6.00
  11   5   0   76.29    7.70
  11   5   0   80.99    7.10
  11   5   0   73.29    7.40
  12   5   0   11.80    2.50
  12   5   0    8.40    3.00
  12   5   0    8.60    3.90
  12   5   0   13.90    4.20
  12   5   0   10.20    3.60
  13   5   0  152.88   10.60
  13   5   0  132.49    9.00
  13   5   0  160.38   10.40
  13   5   0  157.18   11.20
  14   5   0   12.80    3.90
  14   5   0    8.00    4.40
  14   5   0    9.70    3.70
  14   5   0   12.90    4.30
  15   5   0  125.29    9.40
  15   5   0  109.49   10.80
  15   5   0  108.29   10.90
  15   5   0  106.59    8.80
  16   5   0   74.19    9.60
  16   5   0   73.29    8.00
  16   5   0   85.29   10.50
  16  -6   0   12.50    6.20
  16  -6   0    3.30    4.60
  15  -6   0    8.50    3.40
  15  -6   0   11.60    5.00
  15  -6   0    1.40    4.60
  14  -6   0  161.98   11.60
  14  -6   0  189.78   13.00
  14  -6   0  190.38   10.30
  13  -6   0  127.59    9.60
  13  -6   0  128.49    7.90
  13  -6   0  134.39   10.60
  12  -6   0  654.53   26.10
  12  -6   0  635.44   26.90
  12  -6   0  633.94   24.10
  11  -6   0  188.48    9.30
  11  -6   0  183.08   11.50
  11  -6   0  187.08   10.60
  10  -6   0  220.08   11.30
  10  -6   0  208.38   12.00
  10  -6   0  227.88    9.90
   9  -6   0    0.10    2.10
   9  -6   0    4.20    1.80
   9  -6   0    5.60    1.70
   9  -6   0    3.50    1.60
   9  -6   0    2.50    2.70
   8  -6   0   42.10    4.30
   8  -6   0   34.30    4.50
   8  -6   0   39.30    3.50
   8  -6   0   44.10    3.80
   8  -6   0   39.20    3.30
   7  -6   0   -1.30    1.50
   7  -6   0   -0.10    2.10
   7  -6   0    0.30    1.10
   7  -6   0   -0.70    1.20
   7  -6   0   -1.00    1.70
   7  -6   0   -0.30    1.40
  -7   6   0    1.30    1.00
   6  -6   0 3023.70   99.99
   6  -6   0 3076.09  101.09
   6  -6   0 3108.79   99.89
   6  -6   0 3068.09  100.29
   6  -6   0 3067.09   98.49
  -6   6   0 3030.40   98.89
   5  -6   0   61.09    4.60
   5  -6   0   72.29    5.20
   5  -6   0   68.09    4.20
   5  -6   0   81.99    4.80
   4  -6   0  486.85   18.40
   4  -6   0  488.05   17.80
   4  -6   0  522.45   17.40
   4  -6   0  478.65   18.30
  -4   6   0  491.25   17.50
   3  -6   0    7.70    1.30
   3  -6   0    4.70    1.50
   3  -6   0    6.10    1.30
   3  -6   0    6.60    1.30
   3  -6   0    3.60    1.70
   3  -6   0    6.70    2.00
  -3   6   0    4.90    1.60
   2  -6   0  160.78    6.90
   2  -6   0  161.48    6.80
   2  -6   0  161.88    6.70
   2  -6   0  157.98    8.00
   2  -6   0  173.58    6.10
   2  -6   0  164.48    7.10
  -2   6   0  176.28    7.30
  -2   6   0  158.48    7.10
   1  -6   0  320.37   11.90
   1  -6   0  340.97   13.60
   1  -6   0  326.57   12.40
   1  -6   0  341.77   12.50
  -1   6   0  338.57   12.60
  -1   6   0  323.47   11.20
  -1   6   0  332.87   12.60
   0  -6   0 1150.58   38.30
   0  -6   0 1132.59   38.20
   0  -6   0 1165.78   37.20
   0  -6   0 1014.20   39.10
   0   6   0 1152.38   38.30
   0   6   0 1174.18   37.30
   0   6   0 1180.08   38.40
  -1  -6   0    2.20    1.10
  -1  -6   0    3.60    1.50
   1   6   0    1.50    1.40
   1   6   0    1.10    1.10
   1   6   0    2.80    1.40
  -2  -6   0    0.60    1.30
  -2  -6   0    0.90    1.50
   2   6   0    1.00    1.50
   2   6   0    3.00    1.40
   2   6   0    3.60    1.10
   2   6   0    0.60    1.40
   2   6   0    3.10    1.50
  -3  -6   0  307.77   13.50
  -3  -6   0  305.67   12.40
   3   6   0  311.67   12.20
   3   6   0  292.37   13.20
   3   6   0  315.67   12.30
   3   6   0  315.67   11.40
   3   6   0  315.27   12.40
  -4  -6   0  466.25   17.90
  -4  -6   0  428.26   16.20
   4   6   0  440.06   16.30
   4   6   0  370.66   16.90
   4   6   0  442.26   15.50
   4   6   0  432.76   16.00
   4   6   0  416.46   14.00
   4   6   0  390.76   15.80
   4   6   0  443.16   16.20
  -5  -6   0    4.00    1.70
   5   6   0    2.40    1.30
   5   6   0   -0.20    1.60
   5   6   0    2.10    0.90
   5   6   0    0.60    1.70
   5   6   0    2.20    1.50
   5   6   0    2.40    1.70
  -6  -6   0  192.68    9.00
   6   6   0  177.38    9.80
   6   6   0  210.68    8.90
   6   6   0  195.28    8.80
   6   6   0  190.88    7.50
   6   6   0  185.58    8.70
   6   6   0  182.08    9.40
   6   6   0  197.58    8.60
  -7  -6   0   83.19    5.80
   7   6   0   87.99    5.10
   7   6   0   87.49    6.60
   7   6   0   88.79    5.40
   7   6   0   80.19    6.20
   7   6   0   89.79    4.60
   7   6   0  102.09    6.00
   7   6   0   84.19    5.30
  -8  -6   0    9.30    2.60
   8   6   0    9.80    2.30
   8   6   0    5.70    2.90
   8   6   0   10.90    2.00
   8   6   0    2.00    2.10
   8   6   0   12.40    2.40
   8   6   0    5.70    2.30
   8   6   0   10.40    2.00
   9   6   0    0.30    2.60
   9   6   0   -2.20    1.40
   9   6   0    4.10    2.00
   9   6   0   -1.50    2.20
   9   6   0    1.60    2.50
   9   6   0   -0.40    1.40
   9   6   0    0.10    1.20
  10   6   0  670.43   23.30
  10   6   0  712.83   27.30
  10   6   0  660.73   24.60
  10   6   0  673.73   26.20
  10   6   0  660.33   24.50
  10   6   0  670.03   27.00
  11   6   0   37.30    4.40
  11   6   0   46.30    6.30
  11   6   0   37.30    5.40
  11   6   0   41.10    4.20
  11   6   0   35.10    5.90
  12   6   0   93.29    6.10
  12   6   0   85.59    6.50
  12   6   0   96.69    8.30
  12   6   0   78.49    8.60
  12   6   0   90.79    7.80
  13   6   0    2.00    3.00
  13   6   0   -0.80    3.10
  13   6   0   -1.50    2.10
  13   6   0    2.40    3.60
  14   6   0   -1.30    2.80
  14   6   0    3.60    3.50
  14   6   0    4.50    4.40
  14   6   0   -0.90    2.90
  15   6   0   44.50    6.60
  15   6   0   51.99    7.50
  15   6   0   50.59    8.20
  16   6   0   41.00    6.60
  16   6   0   27.10    7.40
  16   6   0   25.70    7.30
  16  -7   0   -1.80    4.50
  16  -7   0    2.20    5.30
  15  -7   0   33.70    7.10
  15  -7   0   28.90    5.90
  14  -7   0   22.20    5.50
  14  -7   0   20.40    5.60
  13  -7   0  149.69   11.10
  13  -7   0  157.98   10.50
  13  -7   0  128.69    8.10
  12  -7   0   23.00    5.30
  12  -7   0   19.40    3.40
  12  -7   0   34.90    5.30
  11  -7   0    5.70    2.20
  11  -7   0    0.90    3.20
  11  -7   0    5.90    3.20
  10  -7   0   95.29    7.90
  10  -7   0   94.69    7.00
  10  -7   0   94.09    5.50
  10  -7   0   87.89    5.50
  10  -7   0   91.89    5.40
   9  -7   0  495.15   18.80
   9  -7   0  507.35   18.20
   9  -7   0  524.65   21.40
   9  -7   0  499.15   19.90
   9  -7   0  507.35   18.90
   8  -7   0   18.50    2.20
   8  -7   0   16.80    3.10
   8  -7   0   15.30    2.60
   8  -7   0   21.50    3.90
   8  -7   0   19.40    2.90
   7  -7   0  275.87   11.60
   7  -7   0  280.77   11.70
   7  -7   0  265.37   10.00
   7  -7   0  274.17   12.70
   7  -7   0  265.27   11.50
   7  -7   0  272.27   12.00
  -7   7   0  277.47   10.60
   6  -7   0    8.50    1.20
   6  -7   0    7.70    2.70
   6  -7   0    9.70    2.40
   6  -7   0    6.60    2.10
   6  -7   0    8.30    2.10
  -6   7   0    4.80    1.80
   5  -7   0  187.78    8.40
   5  -7   0  178.28    8.70
   5  -7   0  172.68    7.70
   5  -7   0  190.28    9.10
  -5   7   0  181.18    7.80
   4  -7   0   82.99    5.70
   4  -7   0   90.19    4.10
   4  -7   0   93.59    4.20
   4  -7   0   96.29    5.60
   4  -7   0   98.29    5.20
   4  -7   0   84.79    4.50
  -4   7   0   89.99    5.00
   3  -7   0  510.55   17.40
   3  -7   0  474.55   18.90
   3  -7   0  506.25   17.50
   3  -7   0  501.75   16.80
   3  -7   0  479.25   18.00
   3  -7   0  479.55   17.20
  -3   7   0  462.95   17.70
  -3   7   0  512.55   18.00
   2  -7   0   13.40    1.90
   2  -7   0   17.50    2.40
   2  -7   0   11.20    1.90
   2  -7   0   15.00    1.40
   2  -7   0   19.10    3.30
   2  -7   0   16.00    2.20
  -2   7   0   17.30    2.50
  -2   7   0   12.70    2.40
   1  -7   0   80.79    4.70
   1  -7   0   81.49    5.70
   1  -7   0   76.29    4.60
   1  -7   0   76.89    4.00
  -1   7   0   67.39    4.70
  -1   7   0   73.39    3.30
  -1   7   0   67.99    4.70
   0  -7   0   57.29    4.20
   0  -7   0   57.29    3.10
   0  -7   0   53.09    4.90
   0  -7   0   67.09    4.40
   0   7   0   60.99    4.40
   0   7   0   59.19    4.10
   0   7   0   63.09    3.30
  -1  -7   0  244.58   12.20
  -1  -7   0  274.57   11.40
   1   7   0  286.47   11.60
   1   7   0  294.47   10.60
   1   7   0  287.67   11.50
  -2  -7   0  625.84   27.50
  -2  -7   0  727.13   26.80
   2   7   0  778.42   25.20
   2   7   0  792.42   26.90
   2   7   0  798.32   27.00
   2   7   0  784.12   26.30
   2   7   0  796.72   28.30
  -3  -7   0 1351.76   45.80
  -3  -7   0 1194.38   46.80
   3   7   0 1402.86   44.40
   3   7   0 1331.57   45.50
   3   7   0 1437.46   45.90
   3   7   0 1375.26   45.40
   3   7   0 1320.37   46.90
  -4  -7   0    3.90    1.90
  -4  -7   0    2.90    2.20
   4   7   0    0.60    1.20
   4   7   0    4.00    1.80
   4   7   0    0.80    1.90
   4   7   0    4.60    2.00
   4   7   0   -0.30    1.50
  -5  -7   0  379.46   15.10
   5   7   0  379.96   14.20
   5   7   0  376.56   16.30
   5   7   0  383.96   14.90
   5   7   0  342.97   14.60
   5   7   0  364.56   14.50
   5   7   0  370.36   15.10
  -6  -7   0  935.11   32.30
   6   7   0  898.21   31.80
   6   7   0  902.61   31.80
   6   7   0  914.91   31.60
   6   7   0  873.31   33.50
   6   7   0  912.31   31.50
   6   7   0  906.01   29.80
   6   7   0  871.31   32.40
  -7  -7   0    5.90    2.50
   7   7   0    7.70    2.80
   7   7   0    7.40    1.50
   7   7   0    7.80    2.30
   7   7   0    8.30    2.10
   7   7   0    4.80    2.50
   7   7   0    7.30    2.20
   7   7   0    7.10    2.40
  -8  -7   0    4.30    2.20
   8   7   0    3.30    2.70
   8   7   0    3.50    1.70
   8   7   0    5.70    2.20
   8   7   0    7.50    2.30
   8   7   0    6.00    1.70
   8   7   0    1.60    2.10
   8   7   0    5.10    2.40
   9   7   0    8.60    2.60
   9   7   0   11.10    3.50
   9   7   0    8.80    2.00
   9   7   0   11.10    2.60
   9   7   0   10.20    2.20
   9   7   0   12.60    3.10
   9   7   0   10.10    3.20
  10   7   0  112.09    8.70
  10   7   0  100.79    8.50
  10   7   0   96.29    6.00
  10   7   0  102.29    5.80
  10   7   0  109.49    6.80
  10   7   0  103.69    7.50
  10   7   0   95.79    5.80
  11   7   0  477.85   20.30
  11   7   0  471.35   18.70
  11   7   0  490.45   21.40
  11   7   0  448.96   18.10
  11   7   0  485.95   21.40
  12   7   0   43.80    5.90
  12   7   0   46.80    5.00
  12   7   0   40.30    5.70
  12   7   0   43.80    6.50
  12   7   0   50.89    7.10
  13   7   0   47.60    6.70
  13   7   0   32.10    5.70
  13   7   0   45.10    6.90
  14   7   0   53.09    8.00
  14   7   0   45.50    7.00
  14   7   0   55.49    7.40
  15   7   0   58.99    9.20
  15   7   0   58.79    8.20
  15   7   0   65.29    8.20
  16   7   0    2.90    4.10
  16  -8   0   69.99    8.90
  16  -8   0   67.19   10.10
  15  -8   0   57.19    7.80
  15  -8   0   46.60    8.10
  14  -8   0  137.59   11.50
  14  -8   0  122.29   10.20
  13  -8   0   11.10    4.30
  13  -8   0    8.20    4.40
  12  -8   0   46.30    6.80
  12  -8   0   67.69    7.00
  11  -8   0   44.10    5.50
  11  -8   0   32.00    5.70
   9  -8   0   11.60    1.90
   9  -8   0    7.20    2.70
   9  -8   0   12.90    3.60
   9  -8   0   12.40    2.70
   9  -8   0   13.20    2.60
   8  -8   0  206.78    9.80
   8  -8   0  210.58   10.40
   8  -8   0  195.88   10.90
   8  -8   0  201.08    9.70
   8  -8   0  200.88    7.90
   8  -8   0  219.78    9.90
  -8   8   0  204.38    8.70
   7  -8   0   10.90    1.20
   7  -8   0    4.20    2.00
   7  -8   0    7.10    2.20
   7  -8   0   10.80    2.70
   7  -8   0   12.10    3.20
  -7   8   0   10.80    2.30
   6  -8   0  401.26   15.50
   6  -8   0  386.26   15.80
   6  -8   0  397.76   16.30
   6  -8   0  379.46   14.70
  -6   8   0  375.96   14.60
   5  -8   0  125.29    7.40
   5  -8   0  126.99    6.70
   5  -8   0  125.79    6.10
   5  -8   0  121.19    7.20
  -5   8   0  148.59    6.70
   4  -8   0  260.77   12.10
   4  -8   0  273.07   11.60
   4  -8   0  267.97   10.90
   4  -8   0  269.57   10.20
   4  -8   0  288.97   10.20
   4  -8   0  258.67   10.00
  -4   8   0  269.47   11.10
   3  -8   0   85.49    5.10
   3  -8   0   82.59    6.00
   3  -8   0   80.09    4.60
   3  -8   0   76.79    4.50
   3  -8   0   87.39    3.90
   3  -8   0   82.19    4.50
  -3   8   0   82.59    5.00
  -3   8   0   88.99    5.30
   2  -8   0  353.96   12.30
   2  -8   0  375.06   13.80
   2  -8   0  379.96   15.50
   2  -8   0  363.56   13.30
   2  -8   0  353.66   13.70
   2  -8   0  341.37   13.80
  -2   8   0  365.66   14.30
  -2   8   0  377.46   14.30
   1  -8   0    8.50    2.00
   1  -8   0    6.80    1.50
   1  -8   0    5.20    2.60
   1  -8   0    6.10    1.70
  -1   8   0    8.00    1.20
  -1   8   0    6.00    2.00
  -1   8   0    5.50    2.10
   0  -8   0  736.63   24.40
   0  -8   0  733.83   25.80
   0  -8   0  672.73   25.80
   0   8   0  742.93   24.60
   0   8   0  768.52   26.20
   0   8   0  715.83   26.00
  -1  -8   0   99.69    5.90
   1   8   0   99.49    5.90
   1   8   0   90.59    6.00
   1   8   0   91.89    4.80
  -2  -8   0  999.40   37.60
  -2  -8   0 1045.60   36.20
   2   8   0 1076.19   36.30
   2   8   0  999.10   35.90
   2   8   0 1063.29   35.30
  -3  -8   0    4.70    1.80
  -3  -8   0    9.80    3.10
   3   8   0   13.20    2.90
   3   8   0    6.40    2.10
   3   8   0    4.70    2.10
   3   8   0    9.50    1.60
   3   8   0    6.70    2.00
  -4  -8   0  457.05   20.40
  -4  -8   0  478.45   19.10
   4   8   0  519.55   19.20
   4   8   0  518.55   19.10
   4   8   0  499.45   18.90
   4   8   0  454.15   20.10
   4   8   0  531.05   17.80
  -5  -8   0   70.19    7.60
  -5  -8   0   46.50    4.90
   5   8   0   49.10    4.80
   5   8   0   46.10    4.20
   5   8   0   59.19    4.70
   5   8   0   41.80    4.50
   5   8   0   53.69    5.50
   5   8   0   57.39    4.00
  -6  -8   0  315.97   13.80
   6   8   0  308.07   13.00
   6   8   0  320.77   13.90
   6   8   0  320.67   13.40
   6   8   0  324.67   12.90
   6   8   0  315.47   13.50
   6   8   0  298.77   14.80
  -7  -8   0   44.70    5.00
   7   8   0   48.90    4.60
   7   8   0   50.59    2.80
   7   8   0   48.10    4.20
   7   8   0   47.20    5.00
   7   8   0   54.39    5.70
   7   8   0   45.60    4.80
   8   8   0  752.92   28.40
   8   8   0  759.82   27.10
   8   8   0  704.03   26.30
   8   8   0  709.93   29.00
   8   8   0  723.33   26.70
   8   8   0  738.53   24.80
   8   8   0  725.83   27.00
   9   8   0    0.10    2.00
   9   8   0   -0.70    1.30
   9   8   0   -3.10    2.10
   9   8   0    0.00    1.60
   9   8   0   -3.10    2.40
   9   8   0   -5.00    2.40
   9   8   0   -2.40    2.10
  10   8   0  574.24   23.30
  10   8   0  622.64   23.00
  10   8   0  575.34   21.60
  10   8   0  566.74   25.00
  10   8   0  609.44   25.00
  10   8   0  590.34   21.90
  11   8   0   12.00    4.30
  11   8   0   11.70    2.30
  11   8   0   13.00    3.80
  11   8   0   13.30    4.50
  11   8   0   15.60    2.80
  11   8   0   14.70    3.30
  12   8   0  193.78   12.60
  12   8   0  186.98   10.00
  12   8   0  188.88   14.40
  12   8   0  191.38   11.50
  13   8   0    7.30    4.40
  13   8   0   17.40    4.90
  14   8   0   -3.30    4.40
  14   8   0   -3.30    3.50
  15   8   0    5.10    6.10
  15   8   0    9.00    4.80
  15  -9   0  205.98   15.50
  15  -9   0  213.38   13.50
  14  -9   0  145.09   10.70
  14  -9   0  180.38   13.20
  13  -9   0   30.40    6.50
  13  -9   0   26.40    5.30
  12  -9   0   -0.90    3.50
  12  -9   0    1.10    3.00
  11  -9   0   89.49    5.90
  11  -9   0  103.49    7.40
  11  -9   0   78.89    8.30
  10  -9   0  281.07   14.40
  10  -9   0  269.17   11.90
  10  -9   0  259.87   11.90
  10  -9   0  262.07   12.70
   9  -9   0    8.40    2.70
   9  -9   0   11.20    3.80
   9  -9   0   11.10    2.80
   9  -9   0   12.90    2.80
   8  -9   0   35.10    4.90
   8  -9   0   31.90    4.20
   8  -9   0   33.50    4.30
   8  -9   0   43.70    4.50
   8  -9   0   35.20    4.50
  -8   9   0   35.80    3.50
   7  -9   0   60.19    6.00
   7  -9   0   65.99    5.60
   7  -9   0   70.59    4.90
   7  -9   0   62.49    5.30
  -7   9   0   61.49    4.50
   6  -9   0  307.87   13.50
   6  -9   0  315.47   12.10
   6  -9   0  314.77   12.90
   6  -9   0  284.97   13.50
  -6   9   0  291.87   12.20
   5  -9   0   27.40    4.00
   5  -9   0   32.50    3.60
   5  -9   0   32.60    4.00
   5  -9   0   31.30    2.90
  -5   9   0   30.50    3.40
   4  -9   0   10.20    1.80
   4  -9   0   10.50    1.70
   4  -9   0    4.40    1.70
   4  -9   0    7.40    2.40
   4  -9   0   10.10    2.50
   4  -9   0   12.00    1.70
  -4   9   0   13.90    2.70
  -4   9   0   12.50    2.60
   3  -9   0    4.30    1.10
   3  -9   0    4.70    1.90
   3  -9   0    5.60    1.60
   3  -9   0    5.40    1.70
   3  -9   0    6.80    2.30
   3  -9   0    5.10    1.60
  -3   9   0    5.80    2.10
  -3   9   0    7.20    2.30
   2  -9   0  233.28    9.40
   2  -9   0  238.08   10.00
   2  -9   0  232.98    8.00
   2  -9   0  233.08    9.80
   2  -9   0  227.38   11.60
   2  -9   0  231.48    9.70
  -2   9   0  233.88   10.40
  -2   9   0  226.08   10.30
   1  -9   0   98.89    5.80
   1  -9   0  112.69    6.20
   1  -9   0  104.79    5.20
   1  -9   0  110.09    7.40
  -1   9   0  105.29    6.40
  -1   9   0  103.49    4.50
  -1   9   0   97.99    6.20
   0  -9   0  164.18    8.20
   0  -9   0  163.38    6.60
   0  -9   0  153.38    7.80
   0   9   0  162.78    8.30
   0   9   0  160.38    8.20
   0   9   0  166.68    6.80
  -1  -9   0  269.07   13.20
  -1  -9   0  258.47   11.70
   1   9   0  262.57   10.50
   1   9   0  279.87   11.90
   1   9   0  274.17   11.90
  -2  -9   0  272.77   13.80
  -2  -9   0  300.77   12.60
   2   9   0  290.37   11.50
   2   9   0  276.47   12.30
   2   9   0  277.77   12.40
  -3  -9   0  206.08   10.00
  -3  -9   0  208.58   11.50
   3   9   0  199.48    7.90
   3   9   0  190.08   11.00
   3   9   0  201.98    9.70
   3   9   0  195.18    9.00
   3   9   0  190.88    9.80
  -4  -9   0  224.48   12.10
  -4  -9   0  221.48   10.70
   4   9   0  209.08   11.60
   4   9   0  209.28   10.40
   4   9   0  210.28    8.80
   4   9   0  206.48   10.00
   4   9   0  222.88   10.40
  -5  -9   0  837.12   32.00
  -5  -9   0  788.42   29.90
   5   9   0  803.12   29.70
   5   9   0  819.62   28.30
   5   9   0  799.42   31.40
   5   9   0  824.82   29.70
   5   9   0  822.32   29.70
  -6  -9   0   42.60    4.60
   6   9   0   53.69    6.30
   6   9   0   46.10    4.80
   6   9   0   55.99    5.20
   6   9   0   51.09    5.30
   6   9   0   61.79    4.40
  -7  -9   0    0.50    2.00
   7   9   0    3.40    3.00
   7   9   0    7.80    2.40
   7   9   0    3.70    2.70
   7   9   0    7.80    2.70
   7   9   0    2.80    2.20
   8   9   0   13.90    3.80
   8   9   0   12.30    3.00
   8   9   0    8.70    3.00
   8   9   0    9.30    3.40
   8   9   0   11.30    2.90
   9   9   0   66.49    6.30
   9   9   0   77.49    6.40
   9   9   0   67.79    6.00
   9   9   0   83.19    7.80
  10   9   0    4.40    2.60
  10   9   0    8.00    4.00
  10   9   0    7.80    2.90
  10   9   0    7.40    3.10
  11   9   0  140.49    9.00
  11   9   0  177.48   10.50
  11   9   0  169.28    9.60
  11   9   0  166.78   11.50
  11   9   0  172.38    8.60
  12   9   0  159.68    9.40
  12   9   0  153.48   11.60
  12   9   0  151.98   10.10
  13   9   0   96.89   10.40
  13   9   0  101.89    9.50
  13   9   0  106.39    9.90
  14   9   0   44.90    7.10
  14   9   0   61.19    9.00
  15   9   0   42.60    9.00
  15   9   0   39.20    7.30
  15 -10   0   12.30    4.80
  15 -10   0   10.50    6.20
  14 -10   0  673.23   27.60
  14 -10   0  625.94   29.40
  13 -10   0   20.00    4.80
  13 -10   0   16.10    5.80
  12 -10   0  135.39    9.40
  12 -10   0  158.48   11.60
  11 -10   0  131.09   10.30
  11 -10   0  126.49    7.40
  11 -10   0  140.29    8.80
  11 -10   0  132.19    7.60
  10 -10   0   10.40    2.90
  10 -10   0    7.40    2.90
  10 -10   0    5.80    2.40
  10 -10   0    2.20    3.20
   9 -10   0   -3.90    2.50
   9 -10   0    1.70    2.10
   9 -10   0   -2.20    2.20
   9 -10   0    0.20    2.10
  -9  10   0   -1.00    1.70
   8 -10   0  162.28   10.00
   8 -10   0  164.68    9.10
   8 -10   0  155.58    8.90
   8 -10   0  148.49    8.20
  -8  10   0  161.48    8.00
   7 -10   0    5.90    2.40
   7 -10   0    2.90    2.30
   7 -10   0    6.60    3.00
   7 -10   0    2.60    1.80
  -7  10   0    4.50    2.00
   6 -10   0  209.58    9.10
   6 -10   0  210.08   11.00
   6 -10   0  213.08   11.00
   6 -10   0  203.98   10.00
  -6  10   0  226.28   10.00
   5 -10   0   67.39    4.80
   5 -10   0   55.29    5.60
   5 -10   0   60.69    5.30
   5 -10   0   59.49    3.70
  -5  10   0   53.49    4.60
   4 -10   0   84.79    4.60
   4 -10   0   90.19    5.30
   4 -10   0   82.29    4.80
   4 -10   0   81.09    6.60
   4 -10   0   85.19    4.10
   4 -10   0   76.29    5.60
  -4  10   0   76.69    5.50
  -4  10   0   86.19    5.80
   3 -10   0  100.39    5.70
   3 -10   0   99.39    7.30
   3 -10   0   91.49    5.70
   3 -10   0   95.39    5.30
   3 -10   0   95.99    5.40
   3 -10   0  101.59    4.10
  -3  10   0   85.99    6.00
  -3  10   0  105.59    6.30
   2 -10   0   71.19    5.00
   2 -10   0   63.89    4.20
   2 -10   0   71.49    4.60
   2 -10   0   66.29    6.20
   2 -10   0   70.99    4.80
  -2  10   0   77.59    5.50
  -2  10   0   66.09    5.30
   1 -10   0  130.69    7.10
   1 -10   0  125.29    6.00
   1 -10   0  131.79    6.00
   1 -10   0  120.59    6.80
  -1  10   0  120.49    5.30
  -1  10   0  140.59    7.60
  -1  10   0  127.99    7.40
   0 -10   0  469.15   20.50
   0 -10   0  487.95   18.80
   0 -10   0  468.25   16.70
   0 -10   0  451.15   18.30
   0  10   0  495.85   19.00
   0  10   0  501.75   19.10
   0  10   0  491.75   17.00
  -1 -10   0   19.60    3.90
  -1 -10   0   21.50    3.30
   1  10   0   27.90    4.00
   1  10   0   24.50    3.70
   1  10   0   27.60    2.90
  -2 -10   0  546.25   20.70
  -2 -10   0  517.55   22.30
   2  10   0  527.05   20.50
   2  10   0  525.85   19.30
   2  10   0  505.15   20.50
  -3 -10   0  467.45   20.80
  -3 -10   0  481.95   19.00
   3  10   0  477.55   18.00
   3  10   0  463.85   18.80
   3  10   0  455.65   18.80
  -4 -10   0   95.59    8.10
  -4 -10   0   77.69    6.50
   4  10   0   81.79    6.20
   4  10   0   80.99    6.50
   4  10   0   80.59    5.80
   4  10   0   93.19    4.80
   4  10   0   76.69    7.90
  -5 -10   0   28.00    4.00
   5  10   0   40.40    4.60
   5  10   0   45.60    3.90
   5  10   0   47.30    5.40
   5  10   0   42.50    5.00
  -6 -10   0  383.56   16.80
   6  10   0  392.86   16.50
   6  10   0  367.56   16.40
   6  10   0  378.26   16.50
   6  10   0  381.76   15.00
  -7 -10   0   28.30    4.80
   7  10   0   23.20    4.30
   7  10   0   22.30    3.80
   7  10   0   26.90    3.70
   7  10   0   18.10    3.90
   8  10   0  325.37   15.70
   8  10   0  336.77   14.20
   8  10   0  317.27   14.80
   8  10   0  327.57   14.70
   9  10   0   74.79    7.70
   9  10   0   87.59    7.00
   9  10   0   72.39    6.10
   9  10   0   76.69    7.00
  10  10   0  525.15   21.80
  10  10   0  512.35   21.60
  10  10   0  552.64   23.60
  10  10   0  551.14   21.30
  11  10   0   72.09    8.30
  11  10   0   63.89    5.90
  11  10   0   57.19    6.40
  11  10   0   55.99    6.20
  12  10   0   48.90    7.40
  12  10   0   45.60    6.20
  12  10   0   52.99    6.20
  12  10   0   50.59    5.00
  13  10   0    4.60    3.60
  13  10   0    1.70    3.80
  13  10   0    2.70    4.50
  14  10   0   21.80    7.00
  14  10   0   18.20    5.70
  14 -11   0   52.09    7.20
  14 -11   0   41.50    8.10
  13 -11   0  134.29   11.80
  13 -11   0  125.99    9.50
  12 -11   0   20.40    5.70
  12 -11   0   29.80    5.10
  11 -11   0   60.29    7.80
  11 -11   0   59.99    5.80
  11 -11   0   65.99    5.90
  11 -11   0   62.99    6.50
  10 -11   0    7.10    2.80
  10 -11   0    8.10    4.00
  10 -11   0    9.20    2.90
  10 -11   0    5.30    2.60
   9 -11   0  377.56   16.20
   9 -11   0  361.36   17.40
   9 -11   0  365.86   15.40
   9 -11   0  352.56   15.90
  -9  11   0  359.66   14.60
   8 -11   0   68.19    6.00
   8 -11   0   76.59    7.60
   8 -11   0   78.39    5.50
   8 -11   0   73.09    6.50
  -8  11   0   70.29    5.40
   7 -11   0  237.18   12.10
   7 -11   0  233.78   11.10
   7 -11   0  224.78   10.00
   7 -11   0  221.98   11.90
  -7  11   0  233.18   10.70
   6 -11   0   23.30    2.80
   6 -11   0   22.70    3.50
   6 -11   0   17.10    3.80
   6 -11   0   23.10    4.20
  -6  11   0   19.60    3.40
   5 -11   0    3.90    2.40
   5 -11   0    2.20    2.60
   5 -11   0    2.20    1.40
   5 -11   0    1.30    1.20
   5 -11   0    3.00    1.40
   5 -11   0    5.30    2.10
  -5  11   0    0.70    2.00
   4 -11   0   17.40    2.60
   4 -11   0   18.50    2.80
   4 -11   0   16.90    3.10
   4 -11   0   17.30    3.60
   4 -11   0   17.10    2.60
   4 -11   0   18.60    1.90
  -4  11   0   17.10    3.30
   3 -11   0   35.10    5.20
   3 -11   0   44.70    4.30
   3 -11   0   41.10    3.70
   3 -11   0   38.60    4.00
   3 -11   0   39.30    3.80
  -3  11   0   43.00    4.60
  -3  11   0   48.10    5.00
   2 -11   0  102.79    5.70
   2 -11   0   88.99    7.50
   2 -11   0   98.19    5.90
   2 -11   0   94.39    5.30
   2 -11   0   86.29    5.90
  -2  11   0  101.19    6.70
  -2  11   0   92.89    6.40
   1 -11   0  134.99    7.60
   1 -11   0  132.89    7.30
   1 -11   0  124.99    6.20
   1 -11   0  126.59    9.00
   1 -11   0  126.39    6.30
  -1  11   0  127.89    5.40
  -1  11   0  130.09    7.90
  -1  11   0  132.09    7.80
   0 -11   0  149.88    8.50
   0 -11   0  140.19    9.50
   0 -11   0  144.59    6.20
   0 -11   0  140.89    8.20
   0  11   0  154.88    8.50
   0  11   0  139.29    6.40
   0  11   0  154.58    8.50
  -1 -11   0   66.29    6.80
  -1 -11   0   58.09    5.50
   1  11   0   65.29    4.20
   1  11   0   60.09    5.70
   1  11   0   47.10    5.00
  -2 -11   0    8.50    3.20
  -2 -11   0   13.50    3.40
   2  11   0    9.00    2.30
   2  11   0   13.90    3.30
   2  11   0    8.70    2.90
  -3 -11   0  341.27   14.90
  -3 -11   0  317.47   16.40
   3  11   0  308.17   14.30
   3  11   0  326.87   14.80
   3  11   0  333.37   13.70
  -4 -11   0  101.59    7.60
   4  11   0  113.59    7.60
   4  11   0  112.79    7.80
   4  11   0  108.19    6.80
   4  11   0  105.19    5.40
  -5 -11   0  601.34   22.80
   5  11   0  543.45   22.10
   5  11   0  517.05   21.50
   5  11   0  559.94   20.00
   5  11   0  524.65   21.90
  -6 -11   0   25.70    4.10
   6  11   0   39.50    5.10
   6  11   0   38.60    5.10
   6  11   0   45.00    4.20
   6  11   0   33.10    4.50
  -7 -11   0  255.07   13.10
   7  11   0  223.68   12.00
   7  11   0  235.98   10.80
   7  11   0  213.08   12.20
   7  11   0  237.08   12.20
   8  11   0   99.99    8.30
   8  11   0  110.59    8.20
   8  11   0  122.89    7.20
   8  11   0  101.39    8.10
   9  11   0  217.58   10.90
   9  11   0  213.48   11.60
   9  11   0  213.88   12.40
   9  11   0  207.28   11.70
  10  11   0    2.10    2.90
  10  11   0    5.50    2.90
  10  11   0   10.50    4.10
  10  11   0    8.10    3.30
  11  11   0   91.59    9.70
  11  11   0   88.59    8.10
  11  11   0   77.09    7.50
  11  11   0   78.09    7.00
  12  11   0    2.00    2.70
  12  11   0   -1.80    4.00
  12  11   0   -1.20    2.90
  12  11   0    1.90    3.00
  13  11   0   92.09   10.60
  13  11   0   95.69    8.70
  13  11   0   97.49    9.50
  14 -12   0  184.58   15.00
  13 -12   0   15.30    6.00
  13 -12   0   11.20    4.50
  12 -12   0  248.98   12.80
  12 -12   0  232.28   15.10
  11 -12   0    5.40    3.00
  11 -12   0    8.00    3.20
  11 -12   0    6.90    3.10
  11 -12   0    2.70    4.00
  10 -12   0    0.30    2.30
  10 -12   0   -2.20    3.40
  10 -12   0    1.70    2.40
  10 -12   0   -3.30    2.20
   9 -12   0   51.69    6.10
   9 -12   0   47.40    5.80
   9 -12   0   45.90    5.00
   9 -12   0   42.80    6.30
  -9  12   0   52.39    5.00
   8 -12   0  170.68   10.60
   8 -12   0  164.68   10.10
   8 -12   0  155.58    9.20
   8 -12   0  161.18    8.20
  -8  12   0  155.78    8.60
   7 -12   0    0.50    2.60
   7 -12   0   -2.80    2.10
   7 -12   0   -4.20    1.50
   7 -12   0   -4.00    2.20
  -7  12   0   -1.10    2.10
   6 -12   0  103.69    8.30
   6 -12   0  109.19    6.90
   6 -12   0   96.79    7.60
  -6  12   0   99.19    6.80
   5 -12   0   28.40    2.90
   5 -12   0   26.50    4.70
   5 -12   0   28.60    4.20
   5 -12   0   34.30    3.90
  -5  12   0   30.10    4.20
   4 -12   0   22.50    3.30
   4 -12   0   26.10    3.40
   4 -12   0   20.60    3.00
   4 -12   0   21.90    3.50
   4 -12   0   26.50    5.40
  -4  12   0   21.60    3.90
   3 -12   0   26.40    3.60
   3 -12   0   34.70    3.70
   3 -12   0   20.20    3.00
   3 -12   0   24.60    5.10
   3 -12   0   29.00    3.90
  -3  12   0   29.70    4.30
   2 -12   0  227.58    9.70
   2 -12   0  203.28   10.00
   2 -12   0  234.58    9.50
   2 -12   0  197.78   12.30
   2 -12   0  217.48   10.40
  -2  12   0  217.38   11.10
  -2  12   0  221.28   11.10
   1 -12   0   41.90    3.60
   1 -12   0   40.80    4.90
   1 -12   0   42.60    3.60
   1 -12   0   30.60    4.70
  -1  12   0   33.40    2.60
  -1  12   0   36.30    4.70
  -1  12   0   39.20    5.10
   0 -12   0   29.20    5.60
   0 -12   0   30.40    4.60
   0  12   0   20.00    3.80
   0  12   0   18.20    3.50
   0  12   0   26.00    2.70
  -1 -12   0   -1.40    1.80
  -1 -12   0   -1.10    2.00
   1  12   0   -1.60    2.30
   1  12   0    0.50    1.60
   1  12   0    4.50    2.40
  -2 -12   0   92.89    7.30
  -2 -12   0   84.89    8.50
   2  12   0  102.79    7.30
   2  12   0   87.89    7.10
   2  12   0   86.99    5.70
  -3 -12   0   53.79    6.30
   3  12   0   41.30    5.30
   3  12   0   47.50    4.70
   3  12   0   49.50    6.00
  -4 -12   0  156.58    9.90
   4  12   0  162.58    8.80
   4  12   0  148.39    9.50
   4  12   0  150.88    9.50
  -5 -12   0  108.19    8.30
   5  12   0  108.19    8.00
   5  12   0  104.69    5.70
   5  12   0   93.39    7.70
   5  12   0  105.79    7.40
  -6 -12   0   14.70    4.10
   6  12   0   13.40    2.70
   6  12   0    6.20    3.20
   6  12   0   14.90    4.00
   6  12   0    3.00    3.00
  -7 -12   0   22.90    4.50
   7  12   0   34.30    5.30
   7  12   0   34.50    5.10
   7  12   0   39.10    5.50
   7  12   0   32.90    4.00
   8  12   0   47.80    6.10
   8  12   0   51.19    6.10
   8  12   0   51.99    6.40
   8  12   0   54.29    5.30
   9  12   0   15.40    3.50
   9  12   0   10.90    4.20
   9  12   0   12.90    3.90
   9  12   0   12.00    3.80
  10  12   0  134.59    8.70
  10  12   0  129.79    9.40
  10  12   0  143.19    9.50
  10  12   0  141.39   10.60
  11  12   0   -0.10    3.70
  11  12   0    3.10    3.20
  11  12   0    0.20    3.00
  11  12   0    0.20    3.20
  12  12   0  182.58   13.50
  12  12   0  182.08   10.40
  12  12   0  188.08   11.80
  12  12   0  167.28   11.00
  13  12   0   25.30    5.40
  13  12   0   24.60    7.10
  13  12   0   17.70    5.20
  13 -13   0    9.40    5.60
  12 -13   0   25.40    4.30
  12 -13   0   24.10    6.30
  11 -13   0   30.50    6.40
  11 -13   0   21.90    4.30
  11 -13   0   22.30    4.40
  10 -13   0   27.10    4.80
  10 -13   0   29.60    5.00
  10 -13   0   27.70    5.70
   9 -13   0  274.97   15.00
   9 -13   0  293.07   14.50
  -9  13   0  285.17   13.00
   8 -13   0   45.80    5.30
   8 -13   0   60.19    7.00
   8 -13   0   53.69    6.50
  -8  13   0   56.39    5.80
   7 -13   0  252.67   14.00
   7 -13   0  274.27   13.80
   7 -13   0  252.97   12.20
  -7  13   0  264.77   12.50
   6 -13   0    8.60    3.90
   6 -13   0    7.70    3.20
   6 -13   0    5.30    2.70
  -6  13   0   15.40    3.40
   5 -13   0  155.78   10.60
   5 -13   0  144.29    6.80
   5 -13   0  153.18    8.20
   5 -13   0  132.79    6.80
   5 -13   0  158.88    9.00
  -5  13   0  149.79    9.10
   4 -13   0   39.60    5.70
   4 -13   0   43.20    4.00
   4 -13   0   47.80    4.50
   4 -13   0   44.90    4.50
   4 -13   0   44.90    4.80
  -4  13   0   45.50    5.50
   3 -13   0  449.36   20.30
   3 -13   0  419.06   17.00
   3 -13   0  439.86   16.90
   3 -13   0  386.86   16.60
   3 -13   0  413.56   16.30
  -3  13   0  442.56   18.40
   2 -13   0   32.60    4.20
   2 -13   0   34.20    3.70
   2 -13   0   37.30    3.90
   2 -13   0   29.20    5.10
  -2  13   0   27.50    4.60
   1 -13   0  302.57   16.10
   1 -13   0  284.07   11.80
   1 -13   0  305.67   13.80
   1 -13   0  309.97   12.20
  -1  13   0  299.57   14.40
  -1  13   0  296.37   14.10
   0 -13   0  105.19    9.40
   0 -13   0  102.09    7.70
   0  13   0  110.69    8.00
   0  13   0  106.39    8.10
   0  13   0  113.49    5.60
  -1 -13   0  199.98   11.20
  -1 -13   0  214.78   13.40
   1  13   0  222.58   11.40
   1  13   0  193.48   11.30
   1  13   0  204.68    9.20
  -2 -13   0  297.47   14.40
   2  13   0  305.57   14.60
   2  13   0  276.07   14.00
   2  13   0  307.57   12.60
  -3 -13   0  106.89    8.40
   3  13   0  121.79    7.10
   3  13   0  115.99    8.40
   3  13   0  100.69    8.10
  -4 -13   0    2.10    2.50
   4  13   0   -0.70    2.80
   4  13   0   -3.10    2.10
   4  13   0   -1.10    2.20
  -5 -13   0   43.20    5.80
   5  13   0   63.29    6.80
   5  13   0   51.29    5.70
   5  13   0   52.29    6.40
  -6 -13   0   34.90    5.20
   6  13   0   29.50    4.90
   6  13   0   45.60    5.70
   6  13   0   34.70    5.50
   7  13   0   37.10    5.60
   7  13   0   33.70    5.30
   7  13   0   35.60    5.50
   8  13   0    3.70    3.30
   8  13   0   -5.10    2.70
   8  13   0    0.60    3.20
   9  13   0  128.89    9.40
   9  13   0  108.69    9.30
   9  13   0  104.79    9.80
  10  13   0   41.60    5.90
  10  13   0   25.20    5.70
  10  13   0   50.09    6.80
  11  13   0   -1.50    4.40
  11  13   0    9.70    4.30
  11  13   0    4.20    3.80
  12  13   0  243.38   14.70
  12  13   0  268.47   13.80
  12  13   0  265.37   16.70
  12 -14   0   54.09    6.20
  12 -14   0   59.79    8.70
  12 -14   0   53.39    6.20
  11 -14   0    5.00    3.20
  11 -14   0    5.70    4.40
  11 -14   0    9.60    3.70
  10 -14   0   51.99    6.60
  10 -14   0   64.09    7.30
  10 -14   0   59.39    7.80
   9 -14   0    6.60    3.50
   9 -14   0    5.30    3.90
  -9  14   0    9.00    3.10
   8 -14   0   -1.80    2.30
   8 -14   0    2.10    3.20
   8 -14   0    3.30    3.30
  -8  14   0    0.70    2.70
   7 -14   0   14.00    4.60
   7 -14   0   11.40    3.20
   7 -14   0   10.70    3.70
  -7  14   0   10.10    3.40
   6 -14   0  188.88   10.00
   6 -14   0  188.38   12.20
   6 -14   0  202.38   11.10
  -6  14   0  187.98   10.70
   5 -14   0   13.70    3.40
   5 -14   0   11.80    4.40
   5 -14   0   14.30    3.40
  -5  14   0   10.70    3.60
   4 -14   0  700.83   25.30
   4 -14   0  668.93   25.80
   4 -14   0  637.64   24.80
   4 -14   0  704.33   29.20
   4 -14   0  710.43   25.30
  -4  14   0  721.03   27.10
   3 -14   0  121.99    7.10
   3 -14   0  130.79    7.50
   3 -14   0  142.39   10.60
   3 -14   0  116.99    7.40
  -3  14   0  122.29    8.70
   2 -14   0  391.56   15.50
   2 -14   0  395.76   16.80
   2 -14   0  438.16   20.40
   2 -14   0  377.26   15.60
  -2  14   0  384.96   17.70
   1 -14   0   37.40    6.00
   1 -14   0   45.80    4.20
   1 -14   0   41.80    5.10
  -1  14   0   47.00    5.60
   0 -14   0   28.60    5.00
   0 -14   0   22.40    5.50
   0 -14   0   27.10    3.30
   0  14   0   25.30    4.60
   0  14   0   17.70    3.80
  -1 -14   0   10.40    3.90
   1  14   0    9.10    3.70
   1  14   0   22.90    3.10
   1  14   0   16.90    4.50
  -2 -14   0  344.77   16.60
   2  14   0  360.26   16.70
   2  14   0  360.96   16.80
   2  14   0  352.16   14.40
  -3 -14   0   30.60    4.70
   3  14   0   48.30    5.00
   3  14   0   43.80    6.10
   3  14   0   33.60    4.90
  -4 -14   0  138.79   10.10
   4  14   0  125.99    8.20
   4  14   0  138.09    9.90
   4  14   0  153.28   10.10
  -5 -14   0   40.70    6.70
   5  14   0   45.80    6.20
   5  14   0   38.00    5.60
   5  14   0   43.10    5.30
  -6 -14   0  419.96   19.30
   6  14   0  387.16   17.70
   6  14   0  389.76   18.40
   6  14   0  386.86   18.40
   7  14   0   39.50    6.10
   7  14   0   39.80    5.80
   7  14   0   29.50    5.40
   8  14   0    0.30    3.20
   8  14   0   -2.30    3.30
   8  14   0   -1.70    2.90
   9  14   0    1.70    4.00
   9  14   0   -1.90    3.50
   9  14   0   -0.70    3.20
  10  14   0   14.80    5.20
  10  14   0    5.30    4.30
  10  14   0    6.90    4.50
  11  14   0   -3.10    4.00
  11  14   0    4.60    4.10
  11  14   0   -1.10    4.90
  11 -15   0    4.40    3.50
  11 -15   0    0.10    3.00
  11 -15   0    6.40    4.90
  10 -15   0    9.00    4.10
  10 -15   0    7.10    4.00
  10 -15   0   12.00    5.00
   9 -15   0   27.30    5.70
   9 -15   0   16.60    5.00
   8 -15   0   73.89    8.90
   8 -15   0   54.89    6.90
  -8  15   0   53.49    6.20
   7 -15   0   -5.00    2.50
   7 -15   0   -6.20    2.60
  -7  15   0   -5.60    2.70
   6 -15   0    4.90    3.20
   6 -15   0    6.00    4.10
  -6  15   0   11.40    3.50
   5 -15   0  165.88    8.10
   5 -15   0  185.08   10.10
   5 -15   0  172.78   12.40
  -5  15   0  180.48   10.80
   4 -15   0  121.69    7.40
   4 -15   0  147.49   11.30
   4 -15   0  129.29    8.00
  -4  15   0  128.39    9.50
   3 -15   0  130.39    8.20
   3 -15   0  133.99   11.10
  -3  15   0  152.68   10.00
   2 -15   0   23.10    5.70
   2 -15   0   33.00    4.90
  -2  15   0   29.90    5.30
   1 -15   0  256.47   15.50
   1 -15   0  244.88   12.60
  -1  15   0  238.78   13.20
   0 -15   0   54.69    6.20
   0  15   0   72.69    7.40
  -1 -15   0   92.19    7.80
   1  15   0   86.29    8.10
   1  15   0   81.09    8.20
  -2 -15   0  117.39    9.50
   2  15   0  130.79    9.70
   2  15   0  128.29    9.40
  -3 -15   0  790.62   30.10
   3  15   0  747.43   29.60
   3  15   0  718.73   27.20
   3  15   0  699.73   29.50
  -4 -15   0    3.00    3.50
   4  15   0    1.40    3.50
   4  15   0    4.50    3.50
   4  15   0    1.90    2.80
  -5 -15   0   90.59   10.00
   5  15   0   69.29    7.80
   5  15   0   82.59    7.00
   5  15   0   74.09    7.90
  -6 -15   0    7.00    4.10
   6  15   0   12.20    4.20
   6  15   0   12.00    4.00
   6  15   0    9.30    4.00
   7  15   0   73.19    8.20
   7  15   0   65.99    7.40
   7  15   0   72.29    8.30
   8  15   0  121.29   10.30
   8  15   0  115.49    9.40
   8  15   0  104.89   10.00
   9  15   0   49.30    7.50
   9  15   0   50.79    7.70
   9  15   0   57.89    7.70
  10  15   0    2.50    4.50
  10  15   0    2.80    4.70
  10  15   0   -3.40    4.20
  10 -16   0    6.00    4.50
  10 -16   0    9.30    4.50
  10 -16   0    1.80    3.60
   9 -16   0   -0.10    3.60
   9 -16   0   -2.00    3.40
   8 -16   0   12.90    4.50
   8 -16   0   14.70    4.60
  -8  16   0    8.00    3.90
   7 -16   0    6.20    3.60
   7 -16   0    4.40    3.90
  -7  16   0    6.60    3.60
   6 -16   0   24.00    4.60
   6 -16   0   15.50    4.80
  -6  16   0   30.20    5.20
   5 -16   0   33.10    6.10
   5 -16   0   40.90    6.50
  -5  16   0   37.30    5.70
   4 -16   0  306.77   17.50
   4 -16   0  298.67   13.20
  -4  16   0  297.97   15.30
   3 -16   0    2.70    4.40
   3 -16   0    6.70    2.90
  -3  16   0    4.20    3.70
   2 -16   0  340.17   15.70
   2 -16   0  341.57   19.00
  -2  16   0  368.06   17.30
   1 -16   0   46.60    5.80
  -1  16   0   49.60    6.60
   0 -16   0   23.10    4.50
   0  16   0   24.50    4.90
  -1 -16   0   23.10    4.40
   1  16   0   25.60    5.50
  -2 -16   0   57.09    6.90
   2  16   0   98.79    9.40
   2  16   0   83.59    8.90
  -3 -16   0   10.20    4.00
   3  16   0    9.50    4.00
   3  16   0   11.60    4.50
  -4 -16   0  603.04   26.80
   4  16   0  629.44   26.60
   4  16   0  633.54   26.70
  -5 -16   0    7.20    4.80
   5  16   0    1.00    3.00
   5  16   0   -0.90    3.70
   5  16   0    1.70    4.00
  -6 -16   0   62.59    7.60
   6  16   0   67.19    8.20
   6  16   0   73.29    7.40
   6  16   0   76.19    8.50
   7  16   0   -0.60    3.50
   7  16   0   -0.50    4.10
   7  16   0   -3.50    3.60
   8  16   0   10.60    4.90
   8  16   0   27.20    5.80
   8  16   0   18.50    5.80
   9  16   0   63.19    8.20
   9  16   0   72.69    8.90
   9  16   0   56.59    8.30
   9 -17   0   55.09    8.00
   9 -17   0   62.79    8.30
   8 -17   0  212.08   14.10
   8 -17   0  210.58   12.90
  -8  17   0  194.58   12.10
   7 -17   0  158.28   12.60
   7 -17   0  181.58   15.70
  -7  17   0  166.48   11.10
   6 -17   0    9.50    4.80
  -6  17   0    5.70    3.70
   5 -17   0   53.29    7.80
  -5  17   0   44.00    6.50
   4 -17   0   21.50    3.70
   4 -17   0   33.00    7.50
  -4  17   0   28.50    5.70
   3 -17   0   15.30    5.60
   3 -17   0   17.50    3.80
  -3  17   0    4.40    4.40
   2 -17   0   14.80    4.10
  -2  17   0   25.60    5.40
   1 -17   0   32.70    5.10
  -1  17   0   32.00    6.00
   0 -17   0    1.60    3.20
   0  17   0   -5.20    3.20
  -1 -17   0  229.88   13.40
   1  17   0  238.88   14.20
  -2 -17   0    3.80    3.50
   2  17   0    3.40    4.10
  -3 -17   0   52.59    7.60
   3  17   0   36.60    6.50
   3  17   0   39.60    6.60
  -4 -17   0   80.99    9.70
   4  17   0   65.99    8.30
   4  17   0   66.49    8.40
  -5 -17   0   61.19    8.70
   5  17   0   61.29    8.50
   5  17   0   76.49    9.20
  -6 -17   0    8.70    4.40
   6  17   0   10.70    5.10
   6  17   0    5.20    4.80
   7  17   0   26.90    6.20
   7  17   0   35.80    7.70
   7  17   0   23.50    5.30
   7 -18   0   13.10    5.90
  -7  18   0    3.30    4.50
   6 -18   0  103.09   12.00
  -6  18   0   83.29    8.80
   5 -18   0    5.00    4.60
  -5  18   0    0.30    4.20
   4 -18   0  164.28    9.30
   4 -18   0  164.88   13.60
  -4  18   0  170.08   12.10
   3 -18   0   23.50    4.70
  -3  18   0   27.40    6.10
   2 -18   0  238.38   13.10
  -2  18   0  252.07   14.80
   1 -18   0   11.20    4.10
  -1  18   0    5.30    4.60
   0 -18   0   18.50    5.10
   0  18   0   13.20    5.40
  -1 -18   0   63.79    7.50
   1  18   0   60.39    8.30
  -2 -18   0   64.29    8.50
   2  18   0   51.49    7.80
  -3 -18   0    0.30    4.00
   3  18   0    5.60    4.90
  -4 -18   0   65.19    8.50
   4  18   0   65.19    9.00
   4  18   0   71.69    9.40
  -5 -18   0    2.20    4.50
   5  18   0    3.70    4.70
   5  18   0   12.70    6.10
   3 -19   0   -1.50    3.40
  -3  19   0    2.40    4.80
   2 -19   0   45.00    6.40
  -2  19   0   48.20    7.80
   1 -19   0  111.29    9.90
  -1  19   0  110.19   11.00
   0 -19   0   -1.50    4.30
   0  19   0   -8.10    5.20
  -1 -19   0   -1.00    4.10
   1  19   0   -6.90    4.70
  -2 -19   0   -0.70    4.10
   2  19   0    3.30    5.60
   2  19  -1   32.80    7.70
  -2 -19   1   25.90    6.20
   1  19  -1   -7.60    4.50
  -1 -19   1   -7.40    3.50
   0  19  -1   -3.30    4.90
   0 -19   1   -1.80    3.90
  -1  19  -1   55.79    8.60
   1 -19   1   67.79    7.90
  -2  19  -1   15.80    5.90
   2 -19   1   16.50    4.70
  -3  19  -1  159.98   12.60
   3 -19   1  129.79   10.10
   4 -19   1    5.80    3.40
   5  18  -1    4.20    4.90
   5  18  -1    2.70    5.40
  -5 -18   1    2.90    5.30
   4  18  -1   74.39    9.10
   4  18  -1   55.39    7.80
  -4 -18   1   86.49   10.50
   3  18  -1    0.20    4.70
  -3 -18   1    2.40    4.20
   2  18  -1   44.20    7.40
  -2 -18   1   43.20    6.70
   1  18  -1   -0.20    4.40
  -1 -18   1   -1.70    3.70
   0  18  -1   41.50    7.30
   0 -18   1   19.40    4.90
  -1  18  -1   -2.00    4.20
   1 -18   1    1.20    3.70
  -2  18  -1    3.00    4.40
   2 -18   1   -0.20    3.00
  -3  18  -1    3.50    4.50
   3 -18   1    4.40    3.40
  -4  18  -1  160.08   11.80
   4 -18   1  153.08    9.30
   4 -18   1  158.98   21.40
  -5  18  -1    7.90    4.70
   5 -18   1    5.90    4.60
  -6  18  -1   95.69    9.50
   6 -18   1  118.49   11.90
   7 -18   1   63.69    9.30
   7  17  -1   72.49    9.20
   7  17  -1   82.29    9.20
   7  17  -1   76.99    9.50
   6  17  -1   -4.30    3.70
   6  17  -1   -1.10    4.30
  -6 -17   1   -0.10    4.50
   5  17  -1  150.48   11.70
   5  17  -1  126.09   11.20
  -5 -17   1  133.89   11.60
   4  17  -1  186.58   12.80
   4  17  -1  182.88   12.80
  -4 -17   1  176.68   12.80
   3  17  -1   -4.10    3.80
   3  17  -1    4.20    4.10
  -3 -17   1   -2.30    3.00
   2  17  -1   67.49    7.80
  -2 -17   1   50.69    6.60
   1  17  -1   40.40    6.60
  -1 -17   1   28.10    5.60
   0  17  -1   84.19    9.00
   0 -17   1   82.69    8.70
  -1  17  -1  125.49   10.30
   1 -17   1  109.29    8.70
  -2  17  -1   -2.60    3.20
   2 -17   1   -0.20    2.60
  -3  17  -1   37.80    6.30
   3 -17   1   34.30    4.90
   3 -17   1   27.40    6.80
  -4  17  -1    5.10    4.00
   4 -17   1    5.00    2.60
   4 -17   1    4.30    3.80
  -5  17  -1   18.90    5.00
   5 -17   1   19.30    6.10
  -6  17  -1   54.49    7.00
   6 -17   1   59.49    9.10
  -7  17  -1   10.60    4.50
   7 -17   1   10.60    4.50
  -8  17  -1   93.49    8.80
   8 -17   1   89.89   10.20
   8 -17   1   98.49    9.60
   9  16  -1   -5.40    4.30
   9  16  -1   -1.00    4.30
   9  16  -1    3.80    4.60
   8  16  -1    5.80    4.30
   8  16  -1   -0.60    4.40
   8  16  -1   -3.00    3.50
   7  16  -1   39.00    7.00
   7  16  -1   35.70    6.60
   7  16  -1   43.20    6.20
   6  16  -1   15.60    4.90
   6  16  -1    9.70    4.00
   6  16  -1   10.30    4.80
  -6 -16   1    5.40    4.30
   5  16  -1   10.70    3.80
   5  16  -1   16.20    5.10
   5  16  -1   19.10    5.10
  -5 -16   1   18.30    5.70
   4  16  -1  522.85   24.00
   4  16  -1  573.94   24.30
  -4 -16   1  532.35   24.10
   3  16  -1   23.70    5.40
   3  16  -1   21.10    5.10
  -3 -16   1    9.90    4.10
   2  16  -1  190.18   12.00
   2  16  -1  173.58   11.70
  -2 -16   1  165.48   11.30
   1  16  -1   20.10    5.00
  -1 -16   1   17.10    4.10
   0  16  -1    2.60    3.50
   0 -16   1    1.30    2.70
  -1  16  -1   -3.20    3.10
   1 -16   1   -1.70    2.40
  -2  16  -1   37.40    5.80
   2 -16   1   31.00    6.40
   2 -16   1   31.00    4.90
  -3  16  -1   11.60    4.40
   3 -16   1    6.90    2.90
   3 -16   1   10.80    4.90
  -4  16  -1  109.79    8.90
   4 -16   1  116.39    7.50
   4 -16   1  119.49   11.00
  -5  16  -1    3.10    3.40
   5 -16   1    7.50    2.40
   5 -16   1    8.00    2.50
   5 -16   1    7.20    4.20
   5 -16   1    2.30    3.40
  -6  16  -1   76.99    7.80
   6 -16   1   87.09   10.40
   6 -16   1   92.79    8.40
  -7  16  -1    9.50    3.90
   7 -16   1    4.70    3.40
   7 -16   1    5.10    3.80
  -8  16  -1    3.00    3.40
   8 -16   1    9.40    4.20
   8 -16   1    2.60    3.80
   9 -16   1   10.00    4.80
   9 -16   1   11.50    5.00
  10 -16   1   42.00    7.10
  10 -16   1   32.80    6.90
  10 -16   1   40.50    6.90
  10  15  -1   -4.90    4.40
  10  15  -1    0.70    4.00
  10  15  -1    5.30    5.00
   9  15  -1   32.20    6.20
   9  15  -1   14.50    5.20
   9  15  -1   17.00    5.20
   8  15  -1  112.59   10.40
   8  15  -1  123.89    9.60
   8  15  -1  112.99    9.90
   7  15  -1  160.98   11.60
   7  15  -1  183.88   11.10
   7  15  -1  173.78   11.70
   6  15  -1   45.00    6.70
   6  15  -1   45.00    5.80
   6  15  -1   47.40    6.90
  -6 -15   1   44.00    6.30
   5  15  -1   31.70    4.90
   5  15  -1   31.00    5.90
   5  15  -1   32.90    5.90
  -5 -15   1   31.20    5.80
   4  15  -1  220.38   13.20
   4  15  -1  227.48   11.30
   4  15  -1  235.48   13.30
  -4 -15   1  230.78   13.50
   3  15  -1   88.49    6.40
   3  15  -1   78.69    8.20
   3  15  -1   88.49    8.40
  -3 -15   1   65.39    7.20
   2  15  -1   25.20    5.20
   2  15  -1   21.50    4.50
  -2 -15   1   27.00    5.50
   1  15  -1  368.06   17.40
   1  15  -1  377.26   17.40
  -1 -15   1  340.77   16.70
   0  15  -1   12.80    4.30
   0 -15   1   12.80    4.10
  -1  15  -1  241.48   13.10
   1 -15   1  236.18   15.10
   1 -15   1  234.58   12.30
  -2  15  -1   -5.10    2.80
   2 -15   1    1.20    2.40
   2 -15   1    0.90    3.10
  -3  15  -1  336.87   16.00
   3 -15   1  335.17   18.10
   3 -15   1  320.77   14.60
  -4  15  -1   96.39    7.90
   4 -15   1   89.89    6.50
   4 -15   1   98.19    9.70
   4 -15   1   92.09    6.90
  -5  15  -1   48.40    6.20
   5 -15   1   36.70    6.40
   5 -15   1   43.80    4.40
   5 -15   1   43.90    4.10
   5 -15   1   41.00    5.30
  -6  15  -1   53.09    6.20
   6 -15   1   51.89    6.30
   6 -15   1   45.10    7.50
  -7  15  -1  272.47   13.80
   7 -15   1  265.67   15.60
   7 -15   1  288.87   14.50
  -8  15  -1   23.30    4.60
   8 -15   1   18.80    4.90
   8 -15   1   28.70    5.40
   9 -15   1    2.50    3.60
   9 -15   1    4.70    4.00
  10 -15   1   87.79    9.00
  10 -15   1   90.89    8.90
  10 -15   1   97.59   10.00
  11 -15   1   -0.50    4.70
  11 -15   1   -0.50    3.50
  11 -15   1    7.40    3.90
  11  14  -1   -1.80    4.00
  11  14  -1    1.80    4.70
  11  14  -1   -4.10    3.80
  10  14  -1   32.90    6.30
  10  14  -1   32.80    6.50
  10  14  -1   45.30    6.20
   9  14  -1   -4.30    3.20
   9  14  -1   -3.10    3.70
   9  14  -1   -4.00    2.90
   8  14  -1    3.30    3.50
   8  14  -1   -2.00    3.10
   8  14  -1   -2.10    3.20
   7  14  -1    0.90    3.20
   7  14  -1   -0.70    3.10
   7  14  -1   -2.00    2.70
   6  14  -1  167.98   10.10
   6  14  -1  152.78   10.70
   6  14  -1  162.38   10.90
  -6 -14   1  174.08   11.60
   5  14  -1   86.19    6.90
   5  14  -1   82.19    8.00
   5  14  -1   97.49    8.50
  -5 -14   1   91.49    8.50
   4  14  -1  630.54   26.20
   4  14  -1  637.54   26.20
   4  14  -1  639.14   24.40
  -4 -14   1  655.93   26.50
   3  14  -1    1.80    3.10
   3  14  -1   -0.50    2.10
   3  14  -1    3.60    3.30
  -3 -14   1   -0.30    2.60
   2  14  -1   55.29    6.30
   2  14  -1   69.79    5.20
   2  14  -1   65.89    7.00
  -2 -14   1   72.29    7.70
   1  14  -1  143.29    9.60
   1  14  -1  143.59    9.60
  -1 -14   1  141.19    9.30
   0  14  -1  171.48   10.20
   0  14  -1  177.08   10.70
   0 -14   1  169.48   12.20
   0 -14   1  160.98    9.90
  -1  14  -1   -0.10    3.00
   1 -14   1    4.10    2.50
   1 -14   1    2.30    3.20
  -2  14  -1  852.41   32.30
   2 -14   1  843.02   34.60
   2 -14   1  848.32   31.30
   2 -14   1  854.71   30.10
  -3  14  -1  101.49    8.00
   3 -14   1  109.29    7.20
   3 -14   1  105.69    9.40
   3 -14   1  105.29    6.80
  -4  14  -1  295.37   14.80
   4 -14   1  308.77   13.40
   4 -14   1  320.87   16.80
   4 -14   1  317.57   14.00
  -5  14  -1    5.30    3.20
   5 -14   1    2.30    3.00
   5 -14   1    7.20    2.10
   5 -14   1    6.60    2.20
   5 -14   1    5.80    2.80
  -6  14  -1  217.58   11.50
   6 -14   1  236.38   14.30
   6 -14   1  206.58   13.10
   6 -14   1  196.28   11.40
  -7  14  -1   37.00    5.00
   7 -14   1   25.60    4.90
   7 -14   1   30.40    6.10
  -8  14  -1   86.79    7.10
   8 -14   1   90.59    8.50
   8 -14   1   86.09    8.60
  -9  14  -1    9.50    3.40
   9 -14   1   10.80    3.90
   9 -14   1   15.10    4.90
  10 -14   1   47.20    6.80
  10 -14   1   46.70    7.30
  10 -14   1   53.39    6.80
  11 -14   1    7.00    4.70
  11 -14   1   11.40    4.10
  11 -14   1    8.30    3.80
  12 -14   1   -1.10    5.20
  12 -14   1   22.00    4.70
  12 -14   1   13.50    4.30
  12  13  -1   19.20    5.30
  12  13  -1   27.20    6.90
  12  13  -1   28.30    5.20
  12  13  -1   34.80    6.20
  11  13  -1   90.39    8.20
  11  13  -1   82.39    7.90
  11  13  -1  100.19    9.30
  11  13  -1   86.59    9.60
  10  13  -1   32.20    5.20
  10  13  -1   25.70    6.00
  10  13  -1   30.20    4.90
  10  13  -1   34.10    5.80
   9  13  -1   94.99    8.10
   9  13  -1   89.19    8.60
   9  13  -1   73.49    8.30
   9  13  -1   83.49    6.90
   8  13  -1    0.30    3.20
   8  13  -1   -0.80    2.90
   8  13  -1    0.20    2.20
   8  13  -1   -3.90    2.90
   7  13  -1   55.99    7.50
   7  13  -1   51.79    6.50
   7  13  -1   49.00    6.10
   7  13  -1   55.59    6.60
   6  13  -1   22.60    4.40
   6  13  -1   24.20    4.90
   6  13  -1   23.90    4.40
  -6 -13   1   22.50    4.60
   5  13  -1  319.17   15.90
   5  13  -1  344.17   15.10
   5  13  -1  371.86   16.50
  -5 -13   1  311.47   16.10
   4  13  -1  141.99    9.30
   4  13  -1  134.29    9.10
   4  13  -1  129.09    7.80
  -4 -13   1  135.49    9.40
   3  13  -1   35.00    5.20
   3  13  -1   30.80    5.10
   3  13  -1   36.80    4.10
  -3 -13   1   38.70    5.90
   2  13  -1   59.19    6.90
   2  13  -1   52.59    4.60
   2  13  -1   44.30    5.80
  -2 -13   1   46.70    5.40
   1  13  -1  843.42   28.80
   1  13  -1  857.11   31.70
   1  13  -1  795.92   31.20
  -1 -13   1  801.32   31.10
  -1 -13   1  832.62   33.80
   0  13  -1  290.37   14.10
   0  13  -1  301.27   14.30
   0  13  -1  309.77   12.00
   0 -13   1  283.07   11.40
   0 -13   1  294.87   16.10
   0 -13   1  257.97   13.40
  -1  13  -1  454.75   19.50
  -1  13  -1  451.05   19.60
   1 -13   1  470.35   21.60
   1 -13   1  461.75   19.00
   1 -13   1  467.05   16.90
   1 -13   1  459.05   17.10
  -2  13  -1   77.89    7.30
   2 -13   1   76.19    6.10
   2 -13   1   72.89    7.60
   2 -13   1   73.09    5.20
   2 -13   1   63.39    4.60
  -3  13  -1  263.07   13.30
   3 -13   1  271.97   15.00
   3 -13   1  273.07   12.20
   3 -13   1  278.47   11.50
   3 -13   1  291.47   12.60
  -4  13  -1    7.00    3.30
   4 -13   1    4.60    2.30
   4 -13   1    5.90    2.20
   4 -13   1    2.10    1.80
   4 -13   1    7.00    3.40
   4 -13   1    9.30    2.80
  -5  13  -1  172.38    9.90
   5 -13   1  186.08   11.80
   5 -13   1  171.38    8.60
   5 -13   1  164.58    7.90
   5 -13   1  164.98    8.00
   5 -13   1  172.98    9.80
  -6  13  -1    4.80    2.80
   6 -13   1    2.20    2.30
   6 -13   1   -1.50    2.60
   6 -13   1    4.00    3.20
  -7  13  -1  318.97   14.60
   7 -13   1  313.57   16.30
   7 -13   1  331.57   15.80
  -8  13  -1    2.40    2.60
   8 -13   1    0.70    3.20
   8 -13   1    5.20    3.30
   9 -13   1   48.60    6.40
   9 -13   1   48.60    6.60
   9 -13   1   43.60    6.60
  10 -13   1    3.60    3.00
  10 -13   1   -1.00    3.80
  10 -13   1    1.60    2.80
  11 -13   1   82.89    7.60
  11 -13   1   90.89    9.70
  11 -13   1   83.89    7.90
  12 -13   1    0.00    4.70
  12 -13   1   -0.50    2.70
  12 -13   1    1.70    2.80
  13 -13   1   15.00    6.40
  13  12  -1    4.30    4.00
  13  12  -1   -3.90    5.00
  13  12  -1    5.90    4.00
  12  12  -1  114.39    9.30
  12  12  -1  121.39    8.30
  12  12  -1  107.39   11.00
  12  12  -1  108.39    8.60
  11  12  -1    5.80    3.80
  11  12  -1    3.90    3.10
  11  12  -1    1.20    2.90
  11  12  -1    8.00    4.50
  10  12  -1   11.80    4.20
  10  12  -1   11.00    4.70
  10  12  -1   15.00    3.90
  10  12  -1   16.00    3.80
   9  12  -1   48.50    6.30
   9  12  -1   48.90    5.90
   9  12  -1   47.20    5.40
   9  12  -1   49.00    6.50
   8  12  -1   40.80    5.70
   8  12  -1   46.10    5.80
   8  12  -1   39.90    4.80
   8  12  -1   43.60    6.10
   7  12  -1   -1.00    2.70
   7  12  -1   -2.20    1.90
   7  12  -1    1.50    2.70
   7  12  -1   -0.50    2.40
   6  12  -1   75.59    6.60
   6  12  -1   74.19    7.00
   6  12  -1   78.19    5.20
   6  12  -1   62.29    6.70
  -6 -12   1   84.89    7.40
   5  12  -1   12.20    3.40
   5  12  -1   10.10    3.30
   5  12  -1    9.30    3.30
  -5 -12   1    3.70    2.70
   4  12  -1  115.09    7.00
   4  12  -1   92.59    7.50
   4  12  -1   96.19    7.60
  -4 -12   1  119.39    8.30
   3  12  -1   81.19    7.00
   3  12  -1   94.59    5.90
   3  12  -1   82.79    6.50
  -3 -12   1   77.39    7.00
   2  12  -1    6.40    2.60
   2  12  -1    7.70    3.20
   2  12  -1   13.10    2.50
  -2 -12   1   10.70    3.90
  -2 -12   1    5.10    2.60
   1  12  -1    9.40    3.20
   1  12  -1    3.30    2.20
   1  12  -1   12.90    2.30
  -1 -12   1    3.60    2.40
  -1 -12   1    6.90    3.90
   0  12  -1  887.61   32.40
   0  12  -1  847.82   32.40
   0  12  -1  888.81   29.60
   0 -12   1  887.81   32.20
   0 -12   1  873.41   34.50
   0 -12   1  867.51   29.50
   0 -12   1  877.51   29.90
  -1  12  -1  211.78   10.80
  -1  12  -1  192.58    7.50
  -1  12  -1  198.28   10.50
   1 -12   1  208.48    8.70
   1 -12   1  209.18   10.30
   1 -12   1  199.08    8.50
   1 -12   1  181.78   11.80
  -2  12  -1    2.80    2.30
  -2  12  -1    0.70    2.60
   2 -12   1    0.20    2.50
   2 -12   1    0.40    1.90
   2 -12   1    0.10    1.70
   2 -12   1    2.70    1.70
  -3  12  -1  326.27   14.60
   3 -12   1  337.77   13.90
   3 -12   1  334.97   13.80
   3 -12   1  329.47   16.50
   3 -12   1  316.27   13.60
   3 -12   1  335.77   13.00
  -4  12  -1   75.99    6.20
   4 -12   1   81.19    5.20
   4 -12   1   78.19    5.10
   4 -12   1   81.59    5.50
   4 -12   1   72.49    5.90
   4 -12   1   73.59    7.40
  -5  12  -1  135.79    8.00
   5 -12   1  133.69    9.40
   5 -12   1  130.29    6.40
   5 -12   1  135.49    6.30
   5 -12   1  121.89    6.50
   5 -12   1  128.99    8.20
   5 -12   1  141.89    7.30
  -6  12  -1  815.92   30.30
   6 -12   1  806.92   29.70
   6 -12   1  827.02   28.80
   6 -12   1  824.52   32.20
   6 -12   1  869.21   31.50
  -7  12  -1   32.00    4.30
   7 -12   1   33.00    5.20
   7 -12   1   37.90    4.50
   7 -12   1   33.50    3.80
   7 -12   1   27.30    4.80
  -8  12  -1  235.08   11.50
   8 -12   1  244.38   11.30
   8 -12   1  260.07   13.40
   8 -12   1  259.07   13.80
   9 -12   1   70.59    8.00
   9 -12   1   95.99    7.70
   9 -12   1   78.69    7.30
   9 -12   1   79.69    6.20
  10 -12   1   11.20    3.50
  10 -12   1   11.60    3.30
  10 -12   1   10.00    4.40
  10 -12   1   14.50    3.90
  11 -12   1   24.90    4.50
  11 -12   1   27.20    6.10
  11 -12   1   25.00    4.60
  11 -12   1   24.20    4.60
  12 -12   1   24.00    6.30
  12 -12   1   16.90    3.60
  12 -12   1   21.80    4.30
  12 -12   1   18.40    4.50
  13 -12   1   17.70    6.30
  13 -12   1   16.20    4.90
  14 -12   1   85.09   10.80
  14  11  -1    6.50    4.60
  14  11  -1    1.60    5.70
  13  11  -1   42.60    6.30
  13  11  -1   38.90    5.90
  13  11  -1   51.99    8.60
  12  11  -1   28.60    6.30
  12  11  -1   31.30    4.10
  12  11  -1   33.40    5.30
  12  11  -1   27.80    5.10
  11  11  -1  308.87   13.40
  11  11  -1  292.77   14.40
  11  11  -1  289.27   14.40
  11  11  -1  256.47   15.50
  10  11  -1    6.00    4.00
  10  11  -1   -1.20    2.60
  10  11  -1    1.70    2.90
  10  11  -1   -0.20    2.70
   9  11  -1  190.28   11.60
   9  11  -1  188.38   10.00
   9  11  -1  176.78   10.60
   9  11  -1  174.78   10.20
   8  11  -1  151.18    9.60
   8  11  -1  143.29    8.30
   8  11  -1  158.28    9.40
   8  11  -1  149.49   10.10
   7  11  -1  132.19    7.70
   7  11  -1  153.98    9.50
   7  11  -1  144.59    9.20
   7  11  -1  149.79    9.20
  -7 -11   1  135.29    9.50
   6  11  -1   16.00    3.80
   6  11  -1   25.20    4.40
   6  11  -1   22.10    3.20
   6  11  -1   20.60    3.90
  -6 -11   1   28.20    5.00
   5  11  -1  294.87   14.40
   5  11  -1  330.97   14.80
   5  11  -1  328.77   14.30
   5  11  -1  321.57   12.80
  -5 -11   1  330.07   15.10
   4  11  -1    1.50    2.50
   4  11  -1    3.20    2.30
   4  11  -1    4.80    2.80
  -4 -11   1    0.70    2.60
   3  11  -1  152.18    8.90
   3  11  -1  156.68    7.80
   3  11  -1  151.28    8.80
  -3 -11   1  139.49    8.80
  -3 -11   1  137.49   10.00
   2  11  -1  156.08    9.00
   2  11  -1  160.48    9.00
   2  11  -1  159.38    7.70
  -2 -11   1  177.88   10.90
  -2 -11   1  152.08    9.00
   1  11  -1   61.19    4.00
   1  11  -1   53.99    5.40
   1  11  -1   69.39    6.80
  -1 -11   1   63.59    5.60
   0  11  -1   10.80    2.90
   0  11  -1    8.10    1.60
   0  11  -1    7.20    2.70
   0 -11   1   11.20    3.00
   0 -11   1    6.60    3.40
   0 -11   1    7.60    1.60
  -1  11  -1  350.46   14.90
  -1  11  -1  334.57   11.90
  -1  11  -1  354.46   15.00
   1 -11   1  338.17   12.80
   1 -11   1  336.77   14.20
   1 -11   1  334.57   14.40
   1 -11   1  347.87   13.10
   1 -11   1  329.67   11.60
   1 -11   1  379.76   16.90
  -2  11  -1   90.79    6.50
  -2  11  -1   88.99    6.60
   2 -11   1   90.29    6.00
   2 -11   1   86.79    5.80
   2 -11   1   96.09    4.00
   2 -11   1   92.59    5.00
   2 -11   1   94.79    7.90
   2 -11   1   96.99    5.60
  -3  11  -1  360.96   15.70
  -3  11  -1  370.96   15.60
   3 -11   1  365.86   14.60
   3 -11   1  388.26   15.00
   3 -11   1  379.06   15.00
   3 -11   1  354.36   17.00
   3 -11   1  364.26   13.10
   3 -11   1  380.06   14.20
  -4  11  -1   85.69    6.20
   4 -11   1   92.99    5.50
   4 -11   1   86.79    4.60
   4 -11   1   92.59    5.60
   4 -11   1   93.79    7.60
   4 -11   1   88.39    6.20
   4 -11   1   92.59    5.40
  -5  11  -1  194.78    9.40
   5 -11   1  181.58    9.70
   5 -11   1  177.88    8.60
   5 -11   1  178.38    8.00
   5 -11   1  183.98    7.90
   5 -11   1  181.18    8.00
   5 -11   1  191.08   10.90
  -6  11  -1  517.05   20.10
   6 -11   1  523.05   19.80
   6 -11   1  518.35   19.10
   6 -11   1  515.55   21.20
   6 -11   1  518.75   21.70
  -7  11  -1  227.18   10.70
   7 -11   1  220.98   10.90
   7 -11   1  228.38   12.10
   7 -11   1  228.38   12.20
   7 -11   1  226.18   10.20
  -8  11  -1  147.09    8.20
   8 -11   1  160.28    9.80
   8 -11   1  157.48    8.30
   8 -11   1  163.58   10.30
   9 -11   1  242.38   12.50
   9 -11   1  234.18   12.30
   9 -11   1  240.58   13.40
   9 -11   1  244.38   11.50
  10 -11   1   26.00    4.30
  10 -11   1   18.80    4.00
  10 -11   1   26.40    5.30
  10 -11   1   24.20    4.40
  11 -11   1  315.97   14.70
  11 -11   1  339.17   15.40
  11 -11   1  325.37   17.30
  11 -11   1  318.47   14.90
  12 -11   1   13.20    5.00
  12 -11   1   15.30    3.30
  12 -11   1   17.60    4.30
  12 -11   1   20.10    3.70
  13 -11   1  164.68   12.90
  13 -11   1  138.79   10.40
  14 -11   1   58.09    7.80
  14 -11   1   47.20    8.60
  14  10  -1   19.70    5.40
  14  10  -1   18.10    6.60
  13  10  -1   11.50    4.30
  13  10  -1   13.70    4.00
  13  10  -1   10.30    5.40
  12  10  -1   16.40    5.20
  12  10  -1    8.10    3.30
  12  10  -1   12.60    3.90
  11  10  -1   11.50    4.40
  11  10  -1   16.70    3.30
  11  10  -1   20.30    4.20
  11  10  -1    9.50    3.40
  10  10  -1  414.16   17.10
  10  10  -1  392.26   17.70
  10  10  -1  418.96   19.60
  10  10  -1  440.56   18.40
   9  10  -1   85.79    7.10
   9  10  -1   84.89    6.50
   9  10  -1   91.39    7.00
   9  10  -1   72.69    7.50
   8  10  -1  251.57   12.30
   8  10  -1  241.38   11.50
   8  10  -1  252.47   13.10
   8  10  -1  253.17   12.20
   7  10  -1    2.50    2.70
   7  10  -1    1.10    2.10
   7  10  -1    0.00    2.00
   7  10  -1    1.70    2.50
  -7 -10   1   -1.20    2.20
   6  10  -1  222.78   10.10
   6  10  -1  217.28   11.30
   6  10  -1  227.48   11.40
   6  10  -1  241.48   11.60
  -6 -10   1  234.78   11.80
   5  10  -1  188.18   10.40
   5  10  -1  214.98   10.70
   5  10  -1  219.08   12.90
   5  10  -1  206.58   10.30
   5  10  -1  206.48    9.10
  -5 -10   1  233.08   11.30
   4  10  -1   23.70    3.80
   4  10  -1   29.20    3.80
   4  10  -1   30.00    4.90
   4  10  -1   35.70    3.00
   4  10  -1   33.60    4.70
  -4 -10   1   19.20    3.20
   3  10  -1  113.39    6.60
   3  10  -1  120.99    7.50
   3  10  -1  121.29    7.60
   3  10  -1  130.79    9.00
  -3 -10   1  120.09    8.70
  -3 -10   1  124.09    7.70
   2  10  -1  520.25   20.30
   2  10  -1  507.25   20.30
   2  10  -1  537.55   19.10
  -2 -10   1  515.65   20.30
  -2 -10   1  507.45   22.00
   1  10  -1   45.20    3.30
   1  10  -1   45.60    4.90
   1  10  -1   35.90    4.20
  -1 -10   1   49.90    6.30
  -1 -10   1   36.10    2.20
  -1 -10   1   28.30    3.60
   0  10  -1  230.08   10.70
   0  10  -1  209.58   10.50
   0  10  -1  236.48    8.80
   0 -10   1  233.58   10.60
   0 -10   1  225.08    8.70
   0 -10   1  233.08   12.30
   0 -10   1  202.58   10.20
  -1  10  -1    0.30    0.80
  -1  10  -1    1.20    2.00
  -1  10  -1    1.10    1.70
   1 -10   1   -0.60    1.20
   1 -10   1   -0.60    1.90
   1 -10   1   -0.10    1.60
   1 -10   1   -0.20    1.30
   1 -10   1    1.50    1.10
  -2  10  -1  155.88    8.50
  -2  10  -1  172.98    8.80
   2 -10   1  176.28    6.40
   2 -10   1  171.08    7.20
   2 -10   1  153.88    9.70
   2 -10   1  165.68    7.80
   2 -10   1  165.18    8.10
   2 -10   1  157.18    7.90
  -3  10  -1   34.50    3.80
  -3  10  -1   35.10    4.00
   3 -10   1   45.40    5.50
   3 -10   1   44.70    2.80
   3 -10   1   47.00    4.00
   3 -10   1   41.30    3.40
   3 -10   1   41.90    3.70
   3 -10   1   47.70    4.10
  -4  10  -1   26.10    3.90
  -4  10  -1   19.00    3.20
   4 -10   1   24.20    4.20
   4 -10   1   23.90    3.00
   4 -10   1   21.90    2.40
   4 -10   1   24.70    3.00
   4 -10   1   26.30    3.00
   4 -10   1   25.80    3.50
  -5  10  -1   33.70    3.80
   5 -10   1   26.90    2.70
   5 -10   1   32.60    3.00
   5 -10   1   24.70    4.00
   5 -10   1   31.40    3.20
   5 -10   1   26.50    3.90
   5 -10   1   34.30    3.70
  -6  10  -1  485.75   18.70
   6 -10   1  468.15   18.50
   6 -10   1  519.55   20.60
   6 -10   1  484.15   18.10
   6 -10   1  481.45   19.90
  -7  10  -1    0.10    1.70
   7 -10   1   -1.30    1.80
   7 -10   1   -1.10    2.20
   7 -10   1    0.50    2.50
  -8  10  -1  113.69    6.70
   8 -10   1  105.69    6.90
   8 -10   1  125.39    8.10
   8 -10   1  129.19    8.90
   8 -10   1  135.39    8.30
   9 -10   1   58.59    5.90
   9 -10   1   49.70    5.30
   9 -10   1   62.99    7.10
   9 -10   1   53.49    5.80
  10 -10   1    2.20    2.30
  10 -10   1   -0.20    2.90
  10 -10   1    2.40    2.50
  10 -10   1    1.40    2.30
  11 -10   1    0.90    2.50
  11 -10   1    1.60    2.20
  11 -10   1   -0.70    2.20
  11 -10   1   -2.40    3.50
  12 -10   1   49.40    7.50
  12 -10   1   37.30    4.50
  12 -10   1   36.30    5.50
  12 -10   1   35.40    4.50
  13 -10   1   28.50    5.50
  13 -10   1   36.80    7.20
  14 -10   1  305.17   18.20
  14 -10   1  283.57   15.80
  15 -10   1   25.20    6.00
  15 -10   1    8.80    6.40
  15   9  -1    2.50    6.30
  15   9  -1    7.70    5.40
  14   9  -1   48.80    8.00
  14   9  -1   47.80    7.40
  13   9  -1   90.89    9.90
  13   9  -1   99.19    7.50
  13   9  -1  118.09    9.10
  12   9  -1   46.10    5.40
  12   9  -1   39.50    5.70
  12   9  -1   47.90    7.20
  11   9  -1  346.07   18.10
  11   9  -1  360.56   14.80
  11   9  -1  408.46   16.90
  11   9  -1  392.96   15.20
  11   9  -1  411.56   17.60
  10   9  -1   50.49    4.60
  10   9  -1   45.40    4.60
  10   9  -1   55.29    9.50
  10   9  -1   49.10    5.70
  10   9  -1   51.79    6.60
  10   9  -1   54.59    5.60
   9   9  -1  709.43   29.10
   9   9  -1  719.63   26.80
   9   9  -1  703.43   28.10
   9   9  -1  725.33   26.10
   9   9  -1  672.63   26.50
   8   9  -1    2.00    2.10
   8   9  -1    1.10    2.10
   8   9  -1   -0.20    2.50
   8   9  -1    2.10    2.20
   8   9  -1   -0.20    2.30
   7   9  -1   67.29    5.10
   7   9  -1   70.09    5.90
   7   9  -1   54.09    6.30
   7   9  -1   76.89    6.00
   7   9  -1   61.39    6.20
  -7  -9   1   55.79    5.60
   6   9  -1   26.00    3.80
   6   9  -1   20.60    3.60
   6   9  -1   30.20    4.80
   6   9  -1   19.80    3.70
   6   9  -1   23.10    3.90
   6   9  -1   21.30    3.10
  -6  -9   1   26.50    4.40
   5   9  -1 1016.80   33.50
   5   9  -1 1001.60   34.70
   5   9  -1  990.20   34.80
   5   9  -1  929.31   34.30
   5   9  -1 1011.10   34.90
   5   9  -1  931.51   36.50
  -5  -9   1  951.70   36.90
  -5  -9   1  952.80   35.00
   4   9  -1   57.79    4.90
   4   9  -1   57.99    4.00
   4   9  -1   72.99    5.50
   4   9  -1   72.99    5.60
   4   9  -1   74.09    6.50
  -4  -9   1   58.89    5.40
  -4  -9   1   67.59    6.40
   3   9  -1 1048.70   37.30
   3   9  -1  975.50   35.30
   3   9  -1 1023.10   34.60
   3   9  -1 1011.90   35.30
  -3  -9   1 1012.40   35.50
  -3  -9   1  914.91   36.80
   2   9  -1   15.30    3.10
   2   9  -1   12.20    2.70
   2   9  -1   10.80    2.10
  -2  -9   1   11.10    3.40
  -2  -9   1    9.20    2.40
   1   9  -1  175.28    7.40
   1   9  -1  161.38    8.40
   1   9  -1  172.98    8.70
  -1  -9   1  171.98    8.70
  -1  -9   1  173.68    9.90
  -1  -9   1  171.28    6.30
   0   9  -1    2.50    1.70
   0   9  -1    5.50    1.40
   0   9  -1    2.90    2.10
   0  -9   1    5.50    1.40
   0  -9   1    5.10    2.20
   0  -9   1    8.40    2.70
   0  -9   1    3.00    2.20
  -1   9  -1  406.56   16.10
  -1   9  -1  410.46   13.80
  -1   9  -1  420.86   16.10
   1  -9   1  395.26   14.80
   1  -9   1  382.56   15.60
   1  -9   1  403.26   14.40
   1  -9   1  437.86   16.00
   1  -9   1  381.56   17.20
  -2   9  -1  437.16   17.70
  -2   9  -1  472.15   18.00
   2  -9   1  451.75   16.40
   2  -9   1  444.16   19.10
   2  -9   1  477.35   17.40
   2  -9   1  486.35   16.00
   2  -9   1  470.85   17.20
   2  -9   1  465.85   17.50
  -3   9  -1   36.90    4.30
  -3   9  -1   23.10    3.20
   3  -9   1   27.30    2.30
   3  -9   1   23.90    2.80
   3  -9   1   26.30    3.20
   3  -9   1   28.10    3.30
   3  -9   1   21.50    3.60
   3  -9   1   27.40    2.80
  -4   9  -1  215.88    9.70
  -4   9  -1  225.98   10.00
   4  -9   1  206.68    8.50
   4  -9   1  204.68    9.00
   4  -9   1  211.48    8.80
   4  -9   1  223.98   11.00
   4  -9   1  202.88    9.80
   4  -9   1  216.08    8.90
   5  -9   1    3.60    2.20
   5  -9   1    2.40    1.20
   5  -9   1    1.50    1.40
   5  -9   1    2.50    2.10
   5  -9   1    1.80    1.50
   5  -9   1    2.30    1.60
  -6   9  -1    3.30    2.00
   6  -9   1    1.40    1.80
   6  -9   1    2.00    2.40
   6  -9   1    6.00    2.40
   6  -9   1    4.40    1.90
  -7   9  -1   17.50    2.80
   7  -9   1   17.80    3.60
   7  -9   1   15.90    2.90
   7  -9   1   18.90    3.60
   8  -9   1   26.80    4.00
   8  -9   1   26.20    4.50
   8  -9   1   24.10    3.90
   8  -9   1   23.50    3.60
   9  -9   1    4.60    2.40
   9  -9   1    1.10    3.20
   9  -9   1    5.20    2.40
   9  -9   1    9.70    2.90
  10  -9   1   12.90    3.00
  10  -9   1   12.40    2.90
  10  -9   1    5.70    3.60
  10  -9   1   13.10    3.30
  11  -9   1  170.38    9.00
  11  -9   1  170.48    9.20
  11  -9   1  177.48   10.20
  11  -9   1  159.88   11.40
  12  -9   1   37.20    4.40
  12  -9   1   38.00    5.70
  12  -9   1   48.10    4.90
  12  -9   1   30.10    6.20
  13  -9   1   81.19    8.40
  13  -9   1  118.09   11.30
  14  -9   1   99.59   11.10
  14  -9   1  127.89   10.40
  15  -9   1   95.89   11.30
  15  -9   1  156.08   11.90
  15   8  -1    6.50    5.90
  15   8  -1    3.60    4.70
  15   8  -1    9.40    4.50
  14   8  -1    9.80    4.20
  14   8  -1   14.90    5.40
  14   8  -1   11.80    4.70
  13   8  -1    0.60    3.40
  13   8  -1    8.30    4.40
  13   8  -1   10.70    4.20
  12   8  -1  240.08   13.20
  12   8  -1  230.58   11.60
  12   8  -1  252.47   14.30
  12   8  -1  252.87   14.50
  11   8  -1    2.40    2.30
  11   8  -1    4.00    3.10
  11   8  -1    1.90    3.40
  11   8  -1   -2.80    2.60
  10   8  -1  178.78   11.40
  10   8  -1  190.88    8.90
  10   8  -1  182.48    9.80
  10   8  -1  193.78    8.70
  10   8  -1  203.28   12.00
  10   8  -1  183.18   10.30
   9   8  -1    1.00    2.60
   9   8  -1    2.50    2.60
   9   8  -1    2.10    1.90
   9   8  -1    2.20    2.30
   9   8  -1    1.30    1.50
   9   8  -1   -3.40    1.80
   9   8  -1   -0.50    1.30
   8   8  -1  462.45   16.40
   8   8  -1  484.25   18.90
   8   8  -1  488.85   20.90
   8   8  -1  481.25   18.80
   8   8  -1  485.05   18.50
   8   8  -1  443.86   19.70
   8   8  -1  483.55   18.20
   7   8  -1  204.58   11.10
   7   8  -1  182.58    9.00
   7   8  -1  177.78    6.60
   7   8  -1  182.58    9.20
   7   8  -1  181.08    8.60
   7   8  -1  171.98    9.00
   7   8  -1  182.58    9.90
  -7  -8   1  177.58    9.60
   6   8  -1   87.99    5.90
   6   8  -1   78.79    6.10
   6   8  -1   80.29    7.00
   6   8  -1   89.49    5.50
   6   8  -1   92.79    6.20
   6   8  -1   88.89    5.50
  -6  -8   1   78.79    6.30
   5   8  -1   45.40    3.70
   5   8  -1   36.00    4.00
   5   8  -1   32.40    3.90
   5   8  -1   39.90    5.00
   5   8  -1   34.10    3.90
   5   8  -1   32.00    3.50
  -5  -8   1   33.60    3.70
   4   8  -1 1261.17   43.10
   4   8  -1 1275.27   42.80
   4   8  -1 1270.07   41.80
   4   8  -1 1261.77   43.10
   4   8  -1 1161.68   44.40
  -4  -8   1 1219.48   44.70
  -4  -8   1 1286.57   43.30
   3   8  -1   36.10    2.70
   3   8  -1   29.40    3.40
   3   8  -1   39.70    5.30
   3   8  -1   27.30    3.30
   3   8  -1   37.80    3.70
  -3  -8   1   42.40    5.70
   2   8  -1 1598.84   54.19
   2   8  -1 1616.24   54.19
   2   8  -1 1638.54   53.19
  -2  -8   1 1588.64   55.69
  -2  -8   1 1574.74   54.09
   1   8  -1  303.87   12.60
   1   8  -1  301.87   11.40
   1   8  -1  298.07   12.60
  -1  -8   1  329.87   12.80
  -1  -8   1  293.07   10.40
   0   8  -1  492.95   16.90
   0   8  -1  484.45   18.40
   0   8  -1  518.55   18.70
   0  -8   1  474.15   19.70
   0  -8   1  488.15   16.90
   0  -8   1  485.15   18.40
  -1   8  -1   30.60    3.80
  -1   8  -1   30.50    3.40
  -1   8  -1   27.90    1.80
   1  -8   1   29.80    2.30
   1  -8   1   27.90    3.40
   1  -8   1   22.10    2.70
   1  -8   1   28.00    4.10
   1  -8   1   28.90    2.60
  -2   8  -1  142.29    7.30
  -2   8  -1  151.98    7.40
   2  -8   1  144.59    6.80
   2  -8   1  151.78    7.10
   2  -8   1  143.19    8.30
   2  -8   1  158.68    7.10
   2  -8   1  140.89    6.20
  -3   8  -1  264.67   11.00
  -3   8  -1  248.38   10.70
   3  -8   1  249.28   10.30
   3  -8   1  260.67   10.90
   3  -8   1  263.57   10.30
   3  -8   1  266.67    9.80
   3  -8   1  248.58   11.90
   3  -8   1  264.17   10.10
  -4   8  -1  175.78    8.20
  -4   8  -1  187.48    8.70
   4  -8   1  175.38    7.90
   4  -8   1  180.68    7.60
   4  -8   1  199.38    7.80
   4  -8   1  177.98    8.80
   4  -8   1  172.88    9.30
   4  -8   1  180.28    7.50
  -5   8  -1   13.20    2.30
   5  -8   1   14.00    3.00
   5  -8   1   10.10    2.60
   5  -8   1    9.70    2.00
   5  -8   1   14.80    2.40
  -6   8  -1  224.98    9.50
   6  -8   1  219.58   10.90
   6  -8   1  226.38    9.70
   6  -8   1  219.98   10.70
   6  -8   1  214.88    9.90
  -7   8  -1   85.89    5.00
   7  -8   1   93.79    5.80
   7  -8   1   88.29    3.80
   7  -8   1   91.09    6.30
   7  -8   1   84.69    6.70
   7  -8   1   85.69    6.20
   8  -8   1    8.20    2.70
   8  -8   1    6.30    1.40
   8  -8   1    7.70    3.30
   8  -8   1    8.60    2.50
   8  -8   1    7.90    2.60
   9  -8   1    0.50    2.30
   9  -8   1    1.30    2.00
   9  -8   1   -0.10    1.20
   9  -8   1   -2.80    1.50
   9  -8   1   -1.90    2.70
  10  -8   1   87.59    6.30
  10  -8   1   93.69    6.40
  10  -8   1  103.69    7.20
  10  -8   1   97.29    8.30
  10  -8   1   88.09    5.40
  11  -8   1   36.00    5.20
  11  -8   1   28.50    3.80
  11  -8   1   28.80    5.40
  11  -8   1   31.40    3.90
  12  -8   1  137.19    9.60
  12  -8   1  157.18   11.30
  13  -8   1    6.80    4.10
  13  -8   1    1.20    3.30
  14  -8   1   93.89    9.50
  14  -8   1   84.09    9.70
  15  -8   1   83.19   10.40
  15  -8   1  116.59   10.90
  16  -8   1   29.20    7.20
  16  -8   1   15.10    7.20
  16   7  -1    0.40    5.60
  16   7  -1    7.00    5.20
  16   7  -1    3.30    3.70
  15   7  -1   27.60    6.50
  15   7  -1   45.90    6.90
  15   7  -1   30.90    6.60
  14   7  -1   11.90    5.30
  14   7  -1   11.20    4.20
  14   7  -1   17.90    5.10
  13   7  -1    6.70    4.00
  13   7  -1    4.20    3.50
  13   7  -1    1.10    3.30
  12   7  -1   17.80    3.40
  12   7  -1   16.00    4.20
  12   7  -1    5.70    4.00
  12   7  -1   14.60    4.10
  12   7  -1   15.60    4.50
  11   7  -1  125.09    7.50
  11   7  -1  131.19    9.80
  11   7  -1  126.89    7.00
  11   7  -1  113.39    8.60
  11   7  -1  136.29    9.60
  10   7  -1   45.50    3.90
  10   7  -1   47.90    3.60
  10   7  -1   39.40    5.60
  10   7  -1   44.00    3.80
  10   7  -1   37.60    5.10
  10   7  -1   39.80    4.60
  10   7  -1   42.10    5.60
   9   7  -1    0.50    1.40
   9   7  -1    1.00    2.20
   9   7  -1    0.60    1.20
   9   7  -1   -1.20    1.70
   9   7  -1    1.00    1.60
   9   7  -1   -1.10    2.50
   9   7  -1   -0.40    2.00
   8   7  -1    0.50    2.20
   8   7  -1   -1.20    1.50
   8   7  -1    2.10    1.50
   8   7  -1   -0.80    2.30
   8   7  -1    0.30    1.60
   8   7  -1    1.30    1.90
   8   7  -1   -1.70    1.10
  -8  -7   1    2.50    1.90
   7   7  -1  158.18    8.20
   7   7  -1  163.18    8.20
   7   7  -1  156.58    6.40
   7   7  -1  160.18    7.70
   7   7  -1  169.88    8.10
   7   7  -1  159.78    9.60
   7   7  -1  152.68    8.80
  -7  -7   1  153.08    8.40
   6   7  -1  140.59    8.50
   6   7  -1  135.79    6.80
   6   7  -1  134.19    6.90
   6   7  -1  138.09    7.80
   6   7  -1  131.39    7.10
   6   7  -1  133.79    5.10
   6   7  -1  134.19    7.30
  -6  -7   1  121.99    7.20
   5   7  -1  226.68   11.50
   5   7  -1  218.38   10.40
   5   7  -1  228.98   10.20
   5   7  -1  223.68   10.20
   5   7  -1  230.58   10.00
   5   7  -1  236.38    9.70
  -5  -7   1  236.58   10.50
   4   7  -1   72.59    4.80
   4   7  -1   76.99    4.50
   4   7  -1   71.89    4.90
   4   7  -1   86.79    5.40
   4   7  -1   72.49    5.90
   4   7  -1   83.39    5.20
  -4  -7   1   83.79    6.30
  -4  -7   1   83.79    5.50
   3   7  -1  117.69    7.50
   3   7  -1  122.69    5.60
   3   7  -1  125.19    6.70
   3   7  -1  124.39    6.70
   3   7  -1  114.19    6.20
  -3  -7   1  129.69    6.80
  -3  -7   1  128.19    7.70
   2   7  -1  610.84   22.80
   2   7  -1  584.94   21.50
   2   7  -1  601.04   20.80
   2   7  -1  580.24   21.50
  -2  -7   1  553.84   21.40
  -2  -7   1  607.04   22.90
   1   7  -1 1156.48   41.20
   1   7  -1 1219.78   41.40
   1   7  -1 1200.78   40.20
  -1  -7   1 1283.77   41.40
  -1  -7   1 1219.38   39.30
   0   7  -1   50.49    4.20
   0   7  -1   58.59    3.10
   0   7  -1   56.59    4.30
   0  -7   1   57.99    5.10
   0  -7   1   54.19    3.10
   0  -7   1   51.99    4.10
  -1   7  -1  457.55   15.20
  -1   7  -1  467.85   17.10
  -1   7  -1  445.76   16.90
   1  -7   1  454.75   16.70
   1  -7   1  459.95   15.70
   1  -7   1  465.65   16.80
   1  -7   1  455.45   16.20
   1  -7   1  437.66   18.00
  -2   7  -1   36.50    3.40
  -2   7  -1   35.30    3.40
   2  -7   1   31.00    3.00
   2  -7   1   29.30    2.90
   2  -7   1   32.80    2.50
   2  -7   1   35.50    3.40
   2  -7   1   27.40    3.50
  -3   7  -1  287.57   11.20
  -3   7  -1  277.77   11.20
   3  -7   1  282.57   10.70
   3  -7   1  268.47   10.50
   3  -7   1  282.37   10.80
   3  -7   1  287.97   12.20
   3  -7   1  247.38   11.10
   3  -7   1  286.27   10.40
  -4   7  -1  119.19    6.00
   4  -7   1  114.69    6.90
   4  -7   1  117.19    5.40
   4  -7   1  121.99    6.00
   4  -7   1  125.39    5.70
   4  -7   1  128.89    6.70
   4  -7   1  122.19    5.40
  -5   7  -1  330.47   11.60
   5  -7   1  284.57   11.70
   5  -7   1  294.77   12.60
   5  -7   1  263.37   12.40
   5  -7   1  280.77   11.40
  -6   7  -1  125.39    6.00
   6  -7   1  124.79    4.90
   6  -7   1  127.69    6.80
   6  -7   1  118.79    7.10
   6  -7   1  137.19    7.70
   6  -7   1  122.89    6.50
   7  -7   1   59.89    4.90
   7  -7   1   65.49    4.80
   7  -7   1   57.09    3.20
   7  -7   1   57.09    4.80
   7  -7   1   63.09    5.60
   8  -7   1   18.20    2.20
   8  -7   1   13.90    2.80
   8  -7   1   19.60    3.30
   8  -7   1   15.70    3.10
   8  -7   1   12.70    3.30
   9  -7   1  215.68    9.30
   9  -7   1  223.08   12.10
   9  -7   1  233.18   11.20
   9  -7   1  216.88   10.40
   9  -7   1  233.38   10.60
  10  -7   1   94.49    7.20
  10  -7   1   97.39    8.30
  10  -7   1   98.79    6.30
  10  -7   1   87.49    6.10
  10  -7   1   99.19    5.70
  11  -7   1   45.00    5.90
  11  -7   1   36.40    3.90
  11  -7   1   32.20    3.90
  11  -7   1   33.40    4.00
  11  -7   1   17.10    4.50
  12  -7   1    2.80    3.50
  12  -7   1    2.50    3.00
  12  -7   1   -4.50    1.80
  13  -7   1   46.60    7.10
  13  -7   1   45.50    6.40
  14  -7   1   84.19    9.70
  14  -7   1   86.59    9.00
  15  -7   1   70.29    9.20
  15  -7   1   61.69    8.30
  16  -7   1    9.60    5.80
  16  -7   1    3.00    5.90
  16   6  -1   18.00    6.40
  16   6  -1   14.60    4.60
  16   6  -1   15.20    5.80
  15   6  -1   21.30    4.90
  15   6  -1   18.40    6.20
  15   6  -1   14.50    5.30
  14   6  -1   12.50    4.80
  14   6  -1   15.80    4.10
  14   6  -1   21.20    4.80
  14   6  -1   26.10    5.90
  13   6  -1    1.80    2.30
  13   6  -1    1.10    3.60
  13   6  -1    4.40    3.20
  13   6  -1    0.20    2.70
  12   6  -1  234.18   12.60
  12   6  -1  225.18   10.30
  12   6  -1  217.88   12.50
  12   6  -1  232.28   11.00
  12   6  -1  222.08   13.30
  11   6  -1   -1.30    1.70
  11   6  -1    0.80    2.30
  11   6  -1   -1.20    2.70
  11   6  -1    1.70    1.90
  11   6  -1   -5.90    2.80
  10   6  -1  226.68   11.70
  10   6  -1  234.08   12.50
  10   6  -1  246.58   10.80
  10   6  -1  229.28   10.40
  10   6  -1  250.87   12.70
   9   6  -1   -1.40    1.40
   9   6  -1    1.10    2.60
   9   6  -1    0.70    1.70
   9   6  -1    0.30    1.20
   9   6  -1    0.40    1.40
   9   6  -1   -0.40    2.00
   9   6  -1   -2.60    1.80
   8   6  -1    1.00    1.50
   8   6  -1   -1.40    1.10
   8   6  -1    1.50    1.90
   8   6  -1    1.20    2.30
   8   6  -1    1.70    1.50
   8   6  -1    0.10    1.20
   8   6  -1   -1.20    1.70
  -8  -6   1    0.30    1.70
   7   6  -1    0.20    1.90
   7   6  -1    1.60    1.50
   7   6  -1    3.00    1.80
   7   6  -1    1.60    1.20
   7   6  -1    1.70    1.20
   7   6  -1   -0.80    1.40
   7   6  -1    1.90    1.70
  -7  -6   1    0.30    1.40
   6   6  -1   44.30    2.60
   6   6  -1   40.80    3.90
   6   6  -1   41.20    3.90
   6   6  -1   53.49    4.20
   6   6  -1   47.90    3.50
   6   6  -1   40.60    4.80
   6   6  -1   34.10    3.90
  -6  -6   1   33.60    3.70
   5   6  -1   53.19    4.10
   5   6  -1   55.59    5.00
   5   6  -1   51.49    4.10
   5   6  -1   49.60    4.20
   5   6  -1   48.70    3.60
   5   6  -1   62.99    2.60
  -5  -6   1   45.30    4.10
   4   6  -1  450.75   17.10
   4   6  -1  455.45   16.70
   4   6  -1  481.15   18.60
   4   6  -1  459.95   17.30
   4   6  -1  459.35   17.30
   4   6  -1  463.35   17.50
  -4  -6   1  490.15   17.60
   3   6  -1   47.40    5.10
   3   6  -1   27.50    2.90
   3   6  -1   29.10    3.20
   3   6  -1   32.30    3.10
   3   6  -1   31.30    2.50
  -3  -6   1   25.10    3.50
  -3  -6   1   26.40    3.00
   2   6  -1  779.22   25.90
   2   6  -1  678.13   27.20
   2   6  -1  748.23   25.20
   2   6  -1  787.42   26.50
   2   6  -1  775.82   26.40
  -2  -6   1  768.22   27.70
  -2  -6   1  758.82   26.50
   1   6  -1   28.00    3.00
   1   6  -1   34.50    3.40
   1   6  -1   37.50    2.70
  -1  -6   1   35.50    4.10
  -1  -6   1   33.70    1.80
  -1  -6   1   37.30    3.50
   0   6  -1   44.40    3.70
   0   6  -1   52.09    2.70
   0   6  -1   45.50    3.70
   0  -6   1   55.09    3.80
   0  -6   1   49.90    2.80
   0  -6   1   48.10    4.50
  -1   6  -1  166.58    7.60
  -1   6  -1  183.98    7.90
  -1   6  -1  164.38    6.20
   1  -6   1  179.98    7.60
   1  -6   1  176.68    7.20
   1  -6   1  196.38    7.80
   1  -6   1  178.38    8.60
   1  -6   1  183.78    6.70
  -2   6  -1  979.10   32.80
  -2   6  -1  959.10   32.60
   2  -6   1  941.11   32.40
   2  -6   1  971.70   31.90
   2  -6   1  929.81   33.70
   2  -6   1  998.90   32.50
   2  -6   1  962.40   32.60
  -3   6  -1  187.28    8.30
  -3   6  -1  209.48    8.40
   3  -6   1  206.98    8.00
   3  -6   1  197.78    8.00
   3  -6   1  199.98    9.30
   3  -6   1  205.88    7.90
   3  -6   1  195.78    7.90
   3  -6   1  185.38    8.60
  -4   6  -1  843.52   28.50
   4  -6   1  818.02   29.40
   4  -6   1  822.02   28.60
   4  -6   1  802.72   29.60
   4  -6   1  877.51   27.90
   4  -6   1  843.82   27.90
   4  -6   1  847.32   28.50
  -5   6  -1 1105.99   37.20
   5  -6   1 1088.39   37.80
   5  -6   1 1099.49   36.30
   5  -6   1 1150.08   38.60
   5  -6   1 1124.79   37.70
   5  -6   1 1123.69   38.80
   6  -6   1  943.31   31.00
   6  -6   1  915.01   32.80
   6  -6   1  928.91   32.50
   6  -6   1  936.11   32.80
   6  -6   1  962.30   33.60
   7  -6   1   23.50    3.20
   7  -6   1   24.60    3.30
   7  -6   1   27.80    2.60
   7  -6   1   24.30    3.80
   7  -6   1   31.30    3.60
   8  -6   1  148.69    8.90
   8  -6   1  145.09    7.60
   8  -6   1  164.48    7.00
   8  -6   1  136.69    7.50
   8  -6   1  142.19    7.90
   9  -6   1    1.80    1.70
   9  -6   1    0.60    2.10
   9  -6   1    0.30    2.50
   9  -6   1    0.70    1.50
   9  -6   1   -1.00    1.50
  10  -6   1  345.07   16.40
  10  -6   1  340.17   14.10
  10  -6   1  354.46   15.60
  10  -6   1  349.96   13.90
  10  -6   1  339.57   14.10
  11  -6   1   66.79    7.80
  11  -6   1   66.89    5.20
  11  -6   1   64.29    5.40
  11  -6   1   70.29    7.10
  11  -6   1   63.29    5.00
  12  -6   1   83.79    6.20
  12  -6   1   86.69    8.80
  12  -6   1   67.79    7.30
  13  -6   1   -3.60    2.90
  13  -6   1    2.40    3.90
  13  -6   1   -1.00    2.30
  14  -6   1   31.20    6.20
  14  -6   1   27.20    4.70
  14  -6   1   34.90    6.60
  15  -6   1   11.70    4.90
  15  -6   1    4.40    4.60
  16  -6   1   55.99    8.60
  16  -6   1   56.69    9.10
  16   5  -1   26.20    7.00
  16   5  -1   37.90    5.80
  16   5  -1   27.40    7.10
  15   5  -1  115.69   11.20
  15   5  -1  147.29   10.00
  15   5  -1  133.89    9.40
  15   5  -1  151.38   11.80
  14   5  -1   58.89    6.60
  14   5  -1   60.59    8.00
  14   5  -1   63.99    7.60
  14   5  -1   74.59    7.30
  13   5  -1  289.37   13.90
  13   5  -1  310.57   14.90
  13   5  -1  318.87   16.30
  13   5  -1  279.07   15.20
  12   5  -1   29.40    5.30
  12   5  -1   29.60    4.80
  12   5  -1   30.30    5.30
  12   5  -1   24.90    3.20
  12   5  -1   28.20    4.20
  11   5  -1  477.15   17.60
  11   5  -1  451.35   19.60
  11   5  -1  473.35   18.40
  11   5  -1  463.95   19.80
  11   5  -1  458.85   20.40
  10   5  -1   22.10    3.00
  10   5  -1   29.60    4.60
  10   5  -1   14.00    3.50
  10   5  -1   23.70    4.50
  10   5  -1   22.40    3.30
   9   5  -1  539.15   22.30
   9   5  -1  557.74   20.70
   9   5  -1  577.74   22.10
   9   5  -1  568.14   22.50
   9   5  -1  580.24   20.60
   8   5  -1  214.18   10.70
   8   5  -1  212.38   10.10
   8   5  -1  207.78   10.70
   8   5  -1  207.78    8.40
   8   5  -1  209.68    9.00
   8   5  -1  214.78    8.50
   8   5  -1  213.78    9.20
   7   5  -1   42.20    4.30
   7   5  -1   35.70    4.40
   7   5  -1   48.50    3.70
   7   5  -1   45.80    3.60
   7   5  -1   45.60    3.20
   7   5  -1   44.90    4.60
   7   5  -1   45.60    3.30
  -7  -5   1   46.50    4.20
   6   5  -1  100.19    5.60
   6   5  -1  109.99    5.60
   6   5  -1  114.49    6.80
   6   5  -1   97.79    5.90
   6   5  -1  111.59    5.30
   6   5  -1  111.69    5.00
   6   5  -1   96.29    6.20
  -6  -5   1  106.59    5.90
   5   5  -1    4.00    1.50
   5   5  -1    6.10    2.40
   5   5  -1    5.20    1.90
   5   5  -1    1.60    1.70
   5   5  -1    6.90    1.90
   4   5  -1  220.98   10.30
   4   5  -1  227.38    7.90
   4   5  -1  225.88    9.20
   4   5  -1  224.48    9.70
   4   5  -1  219.18    9.30
   4   5  -1  238.68    9.20
   4   5  -1  233.48    9.40
  -4  -5   1  231.58    9.60
   3   5  -1  507.45   18.60
   3   5  -1  531.45   18.60
   3   5  -1  513.55   18.70
   3   5  -1  520.55   18.70
   3   5  -1  522.85   19.70
   3   5  -1  518.85   18.10
  -3  -5   1  550.74   19.90
   2   5  -1   66.39    3.70
   2   5  -1   62.99    4.10
   2   5  -1   58.69    3.80
   2   5  -1   64.79    4.70
   2   5  -1   63.39    3.20
  -2  -5   1   72.09    4.20
  -2  -5   1   63.69    4.70
   1   5  -1  431.96   15.90
   1   5  -1  389.26   14.80
   1   5  -1  423.26   14.90
   1   5  -1  400.46   14.20
  -1  -5   1  385.76   15.70
  -1  -5   1  394.86   13.40
  -1  -5   1  429.56   14.90
   0   5  -1   16.40    2.10
   0   5  -1   10.90    1.80
   0   5  -1   14.90    1.40
   0  -5   1   22.40    3.10
   0  -5   1   10.10    1.80
   0  -5   1   16.00    1.50
   0  -5   1   18.20    2.80
  -1   5  -1  140.39    6.10
  -1   5  -1  130.49    4.70
  -1   5  -1  136.99    6.20
   1  -5   1  129.99    6.80
   1  -5   1  130.39    4.70
   1  -5   1  138.69    5.70
   1  -5   1  140.69    6.00
   1  -5   1  134.59    5.20
   1  -5   1  145.29    6.10
  -2   5  -1   21.50    2.30
  -2   5  -1   21.90    2.40
   2  -5   1   18.80    2.20
   2  -5   1   16.20    1.90
   2  -5   1   20.50    1.90
   2  -5   1   21.40    2.20
   2  -5   1   26.90    3.30
  -3   5  -1   -0.20    1.20
   3  -5   1   -0.40    1.00
   3  -5   1    2.80    1.50
   3  -5   1    0.60    1.00
   3  -5   1   -0.40    1.40
   3  -5   1    0.30    1.20
   3  -5   1    0.00    1.10
  -4   5  -1   46.40    3.10
   4  -5   1   49.90    2.70
   4  -5   1   45.50    3.40
   4  -5   1   43.60    3.80
   4  -5   1   49.99    4.00
   4  -5   1   48.40    3.40
   4  -5   1   49.99    2.40
   4  -5   1   48.90    2.60
  -5   5  -1  760.62   25.70
   5  -5   1  733.63   26.80
   5  -5   1  760.12   27.30
   5  -5   1  804.72   26.70
   5  -5   1  764.62   25.40
   6  -5   1   48.00    3.90
   6  -5   1   49.10    4.00
   6  -5   1   43.70    3.00
   6  -5   1   49.40    4.10
   6  -5   1   53.49    5.00
   7  -5   1  479.05   18.40
   7  -5   1  501.95   17.60
   7  -5   1  501.75   18.80
   7  -5   1  493.75   18.40
   7  -5   1  473.45   19.40
   8  -5   1    8.10    2.10
   8  -5   1    8.00    2.10
   8  -5   1    7.20    2.60
   8  -5   1   11.30    2.30
   8  -5   1   10.20    3.00
   9  -5   1   70.79    5.90
   9  -5   1   70.69    5.00
   9  -5   1   71.79    4.90
   9  -5   1   87.59    6.90
   9  -5   1   80.29    5.20
  10  -5   1   55.19    5.90
  10  -5   1   45.70    4.50
  10  -5   1   51.39    4.50
  10  -5   1   54.39    6.20
  10  -5   1   50.69    4.30
  11  -5   1  578.54   21.80
  11  -5   1  631.74   25.20
  11  -5   1  595.64   22.60
  11  -5   1  574.64   21.80
  11  -5   1  602.54   24.20
  12  -5   1  262.37   14.00
  12  -5   1  279.97   15.10
  12  -5   1  270.97   12.60
  13  -5   1  162.48   10.60
  13  -5   1  160.68   11.40
  13  -5   1  156.68    9.30
  14  -5   1   75.09    8.80
  14  -5   1  114.69    9.60
  14  -5   1   88.29    7.40
  15  -5   1    4.30    4.50
  15  -5   1    3.20    3.20
  15  -5   1    3.00    4.10
  16  -5   1    3.20    4.90
  16  -5   1    7.20    4.00
  16  -5   1   12.70    5.90
  17   4  -1    3.90    5.70
  17   4  -1    4.10    3.40
  17   4  -1    1.90    5.80
  17   4  -1    2.20    4.00
  16   4  -1  246.18   12.80
  16   4  -1  246.78   15.60
  16   4  -1  231.58   13.60
  16   4  -1  222.48   15.10
  15   4  -1   18.20    5.20
  15   4  -1   19.50    4.40
  15   4  -1   17.00    3.90
  15   4  -1   12.50    5.10
  14   4  -1  146.89   10.90
  14   4  -1  157.58   10.00
  14   4  -1  168.18   11.70
  14   4  -1  156.88    9.80
  13   4  -1   34.20    5.00
  13   4  -1   54.39    7.00
  13   4  -1   44.80    5.60
  13   4  -1   45.90    6.40
  12   4  -1   66.09    6.20
  12   4  -1   56.59    7.20
  12   4  -1   60.89    6.10
  12   4  -1   58.99    6.80
  11   4  -1   29.70    4.90
  11   4  -1   28.30    4.10
  11   4  -1   29.40    3.10
  11   4  -1   24.10    4.90
  11   4  -1   24.90    4.00
  10   4  -1  272.37   12.10
  10   4  -1  286.97   13.70
  10   4  -1  266.27   13.00
  10   4  -1  275.07   12.80
  10   4  -1  276.27   11.00
   9   4  -1   -1.00    1.40
   9   4  -1    1.00    1.30
   9   4  -1    0.60    2.00
   9   4  -1   -0.60    1.80
   9   4  -1   -2.90    1.80
   8   4  -1  275.97   12.60
   8   4  -1  292.57   11.30
   8   4  -1  293.07   13.20
   8   4  -1  299.47   13.00
   8   4  -1  290.27   11.70
   7   4  -1  184.28    8.80
   7   4  -1  177.18    7.80
   7   4  -1  180.88    7.20
   7   4  -1  186.48    9.10
   7   4  -1  189.28    9.30
   7   4  -1  177.38    7.80
   7   4  -1  173.68    7.10
   6   4  -1 1161.38   38.10
   6   4  -1 1109.09   39.40
   6   4  -1 1154.38   38.30
   6   4  -1 1063.49   39.50
   6   4  -1 1167.28   39.10
   6   4  -1 1176.98   38.00
   6   4  -1 1141.09   37.90
  -6  -4   1 1169.28   39.30
   5   4  -1  174.68    8.40
   5   4  -1  166.18    7.50
   5   4  -1  179.78    7.40
   5   4  -1  202.58    8.90
   5   4  -1  166.88    7.50
   5   4  -1  193.78    7.20
  -5  -4   1  185.58    7.90
   4   4  -1    0.00    0.80
   4   4  -1    1.60    0.80
   4   4  -1    1.40    0.60
   4   4  -1    0.20    1.20
   4   4  -1    0.10    1.10
   4   4  -1   -1.00    1.20
   4   4  -1   -1.20    1.40
   4   4  -1    0.60    1.20
  -4  -4   1    0.50    1.00
   3   4  -1  629.14   21.50
   3   4  -1  648.34   21.20
   3   4  -1  584.34   22.20
   3   4  -1  623.74   21.60
   3   4  -1  624.64   20.10
   3   4  -1  633.04   21.50
   3   4  -1  665.73   21.40
  -3  -4   1  550.34   21.30
   2   4  -1  119.79    5.40
   2   4  -1  110.19    5.10
   2   4  -1  118.39    4.80
   2   4  -1  109.19    5.20
   2   4  -1  116.09    5.20
   2   4  -1  105.69    5.90
  -2  -4   1  108.69    5.30
  -2  -4   1  103.59    5.80
   1   4  -1  190.28    8.20
   1   4  -1  181.88    6.90
   1   4  -1  177.68    7.30
  -1  -4   1  173.78    6.10
  -1  -4   1  186.58    8.10
  -1  -4   1  169.08    7.30
   0   4  -1    0.40    0.80
   0   4  -1   -1.50    0.90
   0   4  -1   -0.10    1.20
   0  -4   1    0.30    1.20
   0  -4   1   -2.50    1.00
   0  -4   1    0.50    1.30
   0  -4   1   -0.50    0.80
  -1   4  -1   67.29    3.60
  -1   4  -1   65.19    3.60
   1  -4   1   65.59    4.20
   1  -4   1   57.79    2.40
   1  -4   1   64.19    2.80
   1  -4   1   64.79    3.40
   1  -4   1   68.99    3.60
   1  -4   1   64.29    3.50
  -2   4  -1    7.00    1.50
  -2   4  -1    5.00    1.30
   2  -4   1   10.00    1.50
   2  -4   1    8.60    1.40
   2  -4   1    6.80    1.60
   2  -4   1    7.70    1.30
   2  -4   1   11.00    2.00
  -3   4  -1  216.38    8.20
   3  -4   1  216.18    7.90
   3  -4   1  222.38    8.40
   3  -4   1  224.68    9.00
   3  -4   1  217.08    8.90
   3  -4   1  209.98    7.40
   3  -4   1  222.08    8.40
   3  -4   1  196.88    7.80
  -4   4  -1   17.60    1.90
   4  -4   1   16.00    2.30
   4  -4   1   13.70    2.30
   4  -4   1   19.80    2.30
   4  -4   1   18.00    1.60
   5  -4   1  111.39    5.80
   5  -4   1  124.39    5.20
   5  -4   1  127.09    6.00
   5  -4   1  110.19    6.30
   6  -4   1  459.65   15.90
   6  -4   1  451.65   17.40
   6  -4   1  422.16   16.60
   6  -4   1  432.36   16.40
   7  -4   1   66.69    4.90
   7  -4   1   73.99    4.70
   7  -4   1   69.09    5.50
   7  -4   1   70.99    4.40
   8  -4   1  871.51   31.70
   8  -4   1  867.81   30.10
   8  -4   1  874.91   31.10
   8  -4   1  835.12   29.90
   9  -4   1   14.50    3.50
   9  -4   1   26.40    3.20
   9  -4   1   15.70    3.30
   9  -4   1   23.90    3.20
  10  -4   1  596.24   21.70
  10  -4   1  566.14   23.30
  10  -4   1  607.24   24.20
  10  -4   1  597.64   22.40
  11  -4   1    2.70    3.00
  11  -4   1    8.40    2.70
  11  -4   1    6.20    3.20
  11  -4   1    9.70    2.40
  12  -4   1  198.58   10.40
  12  -4   1  184.08   11.90
  12  -4   1  201.38   11.50
  12  -4   1  184.08    9.00
  13  -4   1   18.10    4.50
  13  -4   1   20.00    4.10
  13  -4   1   13.00    4.30
  14  -4   1   41.10    6.50
  14  -4   1   36.30    6.40
  14  -4   1   42.00    5.80
  15  -4   1   59.79    8.60
  15  -4   1   52.89    7.90
  15  -4   1   55.79    6.80
  16  -4   1  235.58   15.70
  16  -4   1  235.58   13.80
  16  -4   1  252.77   16.10
  17  -4   1   18.80    5.50
  17  -4   1   15.60    6.70
  17  -4   1    9.70    6.20
  17   3  -1   74.69    8.50
  17   3  -1   63.19    9.40
  17   3  -1   69.69    9.90
  16   3  -1   -1.40    2.40
  16   3  -1    1.00    3.60
  16   3  -1   -0.60    4.40
  16   3  -1    4.50    4.90
  15   3  -1  223.58   14.20
  15   3  -1  235.78   11.90
  15   3  -1  223.98   14.20
  15   3  -1  238.38   13.40
  14   3  -1   41.90    5.80
  14   3  -1   37.50    6.00
  14   3  -1   42.10    6.60
  14   3  -1   42.70    5.20
  13   3  -1  140.49   10.10
  13   3  -1  143.39   10.40
  13   3  -1  146.69    9.50
  13   3  -1  169.98    9.30
  12   3  -1    4.80    3.40
  12   3  -1    5.40    3.10
  12   3  -1    3.30    2.60
  12   3  -1    3.80    2.50
  11   3  -1  472.95   16.90
  11   3  -1  477.75   20.30
  11   3  -1  499.85   19.30
  11   3  -1  463.35   20.10
  11   3  -1  453.05   19.00
  10   3  -1  106.79    5.30
  10   3  -1  100.39    7.10
  10   3  -1  111.99    6.90
  10   3  -1  111.99    7.10
  10   3  -1  110.19    7.70
   9   3  -1  285.07   13.00
   9   3  -1  308.67   13.60
   9   3  -1  280.57   12.60
   9   3  -1  283.17   12.30
   9   3  -1  299.57   11.10
   8   3  -1  309.97   13.40
   8   3  -1  283.57   12.80
   8   3  -1  300.97   12.40
   8   3  -1  318.37   12.90
   8   3  -1  302.07   11.40
   7   3  -1  224.98    9.70
   7   3  -1  237.78   10.40
   7   3  -1  233.28    9.10
   7   3  -1  221.48   10.50
   7   3  -1  248.08   10.50
   6   3  -1   17.40    1.70
   6   3  -1   20.90    3.00
   6   3  -1   13.70    1.90
   6   3  -1   15.40    2.60
   6   3  -1   15.30    1.60
   6   3  -1   16.90    2.90
   6   3  -1   14.00    2.10
   5   3  -1 1347.47   45.30
   5   3  -1 1314.47   44.90
   5   3  -1 1374.06   44.20
   5   3  -1 1333.07   44.00
   5   3  -1 1300.17   43.90
   5   3  -1 1411.76   45.40
   5   3  -1 1353.66   44.30
   5   3  -1 1327.17   43.30
   4   3  -1  271.27   10.60
   4   3  -1  258.77    8.70
   4   3  -1  271.37    9.60
   4   3  -1  255.87    9.40
   4   3  -1  247.78   10.20
   4   3  -1  261.97   10.00
   4   3  -1  243.08    9.30
   4   3  -1  259.27    9.70
  -4  -3   1  257.97    9.80
   3   3  -1    7.70    1.40
   3   3  -1    7.00    1.50
   3   3  -1   10.30    1.00
   3   3  -1    6.20    1.40
   3   3  -1    8.00    1.10
   3   3  -1    5.70    1.60
   3   3  -1    8.10    1.80
   3   3  -1   10.20    1.70
  -3  -3   1    7.10    1.40
   2   3  -1  154.38    6.20
   2   3  -1  142.69    6.10
   2   3  -1  149.39    6.10
   2   3  -1  171.08    6.00
   2   3  -1  161.58    6.80
   2   3  -1  157.18    6.10
  -2  -3   1  142.99    6.70
  -2  -3   1  150.18    5.10
  -2  -3   1  133.69    6.10
   1   3  -1  168.08    6.40
   1   3  -1  153.48    7.20
   1   3  -1  173.08    6.70
   1   3  -1  163.98    6.60
  -1  -3   1  177.18    7.30
  -1  -3   1  166.08    6.70
   0   3  -1   47.90    2.20
   0   3  -1   48.90    3.30
   0   3  -1   33.80    2.50
   0  -3   1   38.60    2.20
   0  -3   1   39.30    3.20
  -1   3  -1 5249.08  163.88
  -1   3  -1 5227.48  163.78
   1  -3   1 4731.43  164.28
   1  -3   1 5343.07  164.98
   1  -3   1 5109.29  163.08
   1  -3   1 4789.42  163.68
   1  -3   1 5143.39  163.78
   1  -3   1 5367.76  163.28
  -2   3  -1  174.78    6.60
  -2   3  -1  164.18    6.70
   2  -3   1  172.28    7.20
   2  -3   1  171.88    7.00
   2  -3   1  178.98    6.50
   2  -3   1  171.38    6.50
   2  -3   1  175.58    6.60
   2  -3   1  177.38    6.00
  -3   3  -1  473.45   15.90
   3  -3   1  478.85   15.70
   3  -3   1  467.15   16.80
   3  -3   1  475.35   15.80
   3  -3   1  463.85   16.40
   3  -3   1  466.15   15.70
   4  -3   1  205.38    8.40
   4  -3   1  214.68    9.00
   4  -3   1  197.18    7.80
   4  -3   1  213.88    8.50
   5  -3   1  723.83   26.20
   5  -3   1  771.12   26.20
   5  -3   1  763.52   25.70
   5  -3   1  769.42   26.90
   6  -3   1  677.13   23.40
   6  -3   1  654.83   23.20
   6  -3   1  684.13   24.50
   6  -3   1  652.93   23.90
   7  -3   1  346.17   14.10
   7  -3   1  355.76   13.40
   7  -3   1  343.27   13.40
   7  -3   1  346.77   14.60
   8  -3   1  453.35   17.20
   8  -3   1  479.85   17.60
   8  -3   1  470.35   18.30
   8  -3   1  441.96   18.50
   9  -3   1  868.51   29.80
   9  -3   1  826.32   30.50
   9  -3   1  817.82   29.00
   9  -3   1  799.62   30.80
  10  -3   1    5.50    2.70
  10  -3   1    6.70    2.90
  11  -3   1  713.43   28.10
  11  -3   1  741.53   26.00
  11  -3   1  734.73   28.70
  11  -3   1  693.83   27.00
  12  -3   1   67.99    7.30
  12  -3   1   66.49    7.30
  12  -3   1   72.09    6.20
  12  -3   1   66.49    5.20
  13  -3   1  114.99    9.00
  13  -3   1   94.39    7.50
  13  -3   1   77.09    8.30
  14  -3   1   26.70    5.70
  14  -3   1   29.10    5.80
  14  -3   1   27.20    4.90
  15  -3   1  106.39    8.70
  15  -3   1  112.89   10.90
  15  -3   1  115.09   11.00
  16  -3   1   12.00    5.40
  16  -3   1    7.00    4.30
  16  -3   1    9.20    5.50
  17  -3   1   66.09    9.80
  17  -3   1   47.90    8.70
  17  -3   1   61.49    8.10
  17   2  -1   23.90    5.90
  17   2  -1   15.00    6.30
  17   2  -1   22.80    6.40
  16   2  -1  141.09   11.70
  16   2  -1  144.09   12.00
  16   2  -1  141.89   11.00
  15   2  -1    5.40    3.80
  15   2  -1    5.60    3.90
  15   2  -1    0.50    3.00
  15   2  -1    4.50    2.60
  14   2  -1   25.20    5.50
  14   2  -1   14.90    4.10
  14   2  -1   15.40    3.30
  14   2  -1   16.50    4.80
  13   2  -1   66.39    5.80
  13   2  -1   61.59    6.70
  13   2  -1   70.39    7.50
  13   2  -1   59.19    7.00
  12   2  -1   37.60    5.70
  12   2  -1   31.20    4.90
  12   2  -1   37.30    4.40
  12   2  -1   34.60    4.80
  11   2  -1    6.90    3.40
  11   2  -1    7.50    1.40
  11   2  -1    1.90    2.40
  11   2  -1    1.10    2.80
  11   2  -1    8.10    2.60
  10   2  -1    9.50    2.50
  10   2  -1    8.40    2.70
  10   2  -1   10.80    3.20
  10   2  -1    9.40    1.60
  10   2  -1    9.50    3.20
   9   2  -1    4.50    1.20
   9   2  -1    0.50    1.70
   9   2  -1    1.10    2.20
   9   2  -1    1.20    2.00
   9   2  -1    1.40    1.80
   8   2  -1 1566.84   50.29
   8   2  -1 1477.45   52.39
   8   2  -1 1570.64   52.69
   8   2  -1 1497.35   51.69
   8   2  -1 1582.34   51.99
   7   2  -1   34.50    3.30
   7   2  -1   25.90    3.10
   7   2  -1   22.30    3.30
   7   2  -1   25.80    2.10
   7   2  -1   24.40    3.40
   6   2  -1  701.83   25.30
   6   2  -1  739.73   25.10
   6   2  -1  681.73   25.40
   6   2  -1  719.83   24.80
   6   2  -1  724.03   24.00
   5   2  -1  116.49    5.60
   5   2  -1  106.09    4.20
   5   2  -1   97.89    4.90
   5   2  -1  115.89    5.40
   5   2  -1   87.09    4.30
   5   2  -1   91.39    5.30
   4   2  -1  129.29    5.80
   4   2  -1  114.39    5.70
   4   2  -1  129.79    5.40
   4   2  -1  139.99    4.90
   4   2  -1  128.89    4.70
   4   2  -1  116.99    5.80
   4   2  -1  121.69    5.10
   4   2  -1  120.69    4.90
   3   2  -1  241.48    9.10
   3   2  -1  234.68    8.60
   3   2  -1  243.78    9.20
   3   2  -1  234.58    8.90
   3   2  -1  238.48    8.00
   3   2  -1  234.78    8.40
   3   2  -1  228.68    8.40
   3   2  -1  232.48    8.40
  -3  -2   1  239.58    8.60
   2   2  -1  662.63   21.40
   2   2  -1  622.44   21.30
   2   2  -1  636.34   20.90
   2   2  -1  659.03   21.50
   2   2  -1  675.93   21.90
   2   2  -1  628.44   21.30
   2   2  -1  656.73   21.60
  -2  -2   1  612.04   21.30
   1   2  -1  232.78    8.50
   1   2  -1  233.08    8.90
   1   2  -1  243.88    8.40
   1   2  -1  234.58    8.50
   1   2  -1  245.38    8.30
   1   2  -1  255.17    8.60
   0   2  -1 1427.86   45.40
   0   2  -1 1475.85   45.00
   0   2  -1 1235.88   45.70
   0   2  -1 1421.36   45.40
   0  -2   1 1530.05   45.20
   0  -2   1 1337.17   45.40
   0  -2   1 1255.67   45.30
   0  -2   1 1475.95   45.90
  -1   2  -1 1195.48   39.50
  -1   2  -1 1207.28   39.40
   1  -2   1 1280.47   39.50
   1  -2   1 1177.58   39.50
   1  -2   1 1221.68   39.40
  -2   2  -1  716.53   24.80
   2  -2   1  771.72   25.30
   2  -2   1  780.22   24.70
   2  -2   1  759.42   24.70
   2  -2   1  742.63   24.60
   3  -2   1  131.09    4.90
   3  -2   1  142.29    5.80
   3  -2   1  129.49    5.60
   3  -2   1  137.89    6.10
   3  -2   1  131.79    5.30
   3  -2   1  133.19    4.90
   4  -2   1  514.95   18.20
   4  -2   1  538.25   18.80
   4  -2   1  547.55   18.60
   4  -2   1  525.75   19.00
   5  -2   1  693.83   24.50
   5  -2   1  685.33   25.10
   5  -2   1  727.03   24.90
   5  -2   1  731.33   24.40
   6  -2   1  659.63   23.50
   6  -2   1  669.13   22.90
   6  -2   1  655.03   22.90
   6  -2   1  618.24   23.60
   7  -2   1    2.80    1.80
   7  -2   1    0.10    1.70
   7  -2   1    3.60    0.70
   7  -2   1    2.50    2.00
   7  -2   1    2.60    1.40
   8  -2   1  887.11   32.10
   8  -2   1  935.61   33.20
   8  -2   1  903.81   32.80
   8  -2   1  938.31   31.80
   9  -2   1   60.69    5.30
   9  -2   1   60.89    4.90
   9  -2   1   60.29    5.40
   9  -2   1   61.29    4.60
  10  -2   1   48.90    5.40
  10  -2   1   45.00    4.90
  10  -2   1   53.19    5.80
  10  -2   1   57.59    4.60
  11  -2   1   63.79    5.00
  11  -2   1   46.40    5.70
  11  -2   1   47.40    5.90
  11  -2   1   47.90    5.40
  12  -2   1   45.00    5.40
  12  -2   1   32.10    3.90
  12  -2   1   35.60    5.50
  12  -2   1   33.60    5.30
  13  -2   1    7.30    4.00
  13  -2   1    5.40    2.30
  13  -2   1    7.40    3.70
  13  -2   1   11.20    3.70
  14  -2   1    1.70    3.50
  14  -2   1   -0.20    3.00
  14  -2   1    1.90    3.80
  15  -2   1    2.20    4.10
  15  -2   1    0.30    3.60
  15  -2   1   -5.80    2.80
  16  -2   1  604.54   27.50
  16  -2   1  569.34   25.50
  16  -2   1  606.94   27.30
  17  -2   1    5.20    4.50
  17  -2   1   14.00    5.90
  17  -2   1    8.40    5.90
  17   1  -1  125.49   12.50
  17   1  -1  103.99   11.20
  17   1  -1  143.09   11.60
  16   1  -1   45.00    6.90
  16   1  -1   37.40    6.90
  16   1  -1   51.49    7.60
  15   1  -1   14.80    4.80
  15   1  -1   20.90    4.90
  15   1  -1   23.50    5.30
  14   1  -1  164.08   11.00
  14   1  -1  171.38   11.60
  14   1  -1  153.78   10.50
  13   1  -1  103.19    8.70
  13   1  -1  110.29    8.40
  13   1  -1   91.89    8.60
  13   1  -1   89.69    6.30
  12   1  -1  371.46   17.70
  12   1  -1  402.46   15.90
  12   1  -1  411.06   17.80
  12   1  -1  414.86   18.10
  11   1  -1  213.38   11.40
  11   1  -1  222.28   10.00
  11   1  -1  230.88   11.90
  11   1  -1  222.38   11.80
  10   1  -1   10.60    3.30
  10   1  -1   12.20    3.10
  10   1  -1   15.00    1.40
  10   1  -1   13.30    3.20
  10   1  -1    9.20    2.20
   9   1  -1  198.78    9.80
   9   1  -1  195.98   10.00
   9   1  -1  193.48    8.90
   9   1  -1  204.68    7.30
   9   1  -1  201.18   10.10
   8   1  -1 1464.55   49.30
   8   1  -1 1470.95   50.29
   8   1  -1 1492.15   47.80
   8   1  -1 1481.55   49.99
   8   1  -1 1456.05   50.39
   7   1  -1  454.85   16.30
   7   1  -1  450.95   17.20
   7   1  -1  446.06   17.20
   7   1  -1  431.16   15.00
   7   1  -1  445.36   16.80
   6   1  -1   20.40    1.70
   6   1  -1   17.50    2.50
   6   1  -1   23.90    3.00
   6   1  -1   17.90    2.60
   6   1  -1   20.10    2.40
   5   1  -1 1902.31   60.99
   5   1  -1 1832.32   62.09
   5   1  -1 1935.71   61.59
   5   1  -1 1824.22   61.99
   5   1  -1 1886.51   61.79
   5   1  -1 1929.21   60.69
   4   1  -1   -0.80    0.80
   4   1  -1   -2.00    1.00
   4   1  -1   -2.40    0.80
   4   1  -1   -0.70    1.40
   4   1  -1   -1.30    1.30
   4   1  -1   -1.80    1.20
   3   1  -1  693.43   23.10
   3   1  -1  646.64   22.90
   3   1  -1  687.13   22.80
   3   1  -1  686.53   22.80
   3   1  -1  693.53   22.40
   3   1  -1  678.43   22.40
   2   1  -1    7.60    0.70
   2   1  -1    7.20    0.90
   2   1  -1    8.00    0.90
   2   1  -1    7.30    0.70
   2   1  -1    4.80    1.10
   2   1  -1    6.60    1.10
   2   1  -1    8.20    0.80
   2   1  -1    6.10    1.10
   1   1  -1 3204.28  103.19
   1   1  -1 3221.88  103.19
   1   1  -1 3245.58  103.49
   1   1  -1 3336.17  103.69
   1   1  -1 3098.29  103.29
   1   1  -1 3336.07  103.09
   1   1  -1 3176.78  103.29
  -1  -1   1 3325.47  103.09
  -1  -1   1 3155.28  103.39
  -1  -1   1 3136.99  103.29
  -1  -1   1 3297.07  103.49
   0   1  -1  595.54   20.70
   0   1  -1  617.44   20.70
   0   1  -1  678.03   20.80
   0  -1   1  646.94   20.80
   0  -1   1  571.14   20.50
   0  -1   1  701.33   20.80
  -1   1  -1  644.04   21.70
   1  -1   1  661.03   21.70
   1  -1   1  690.83   21.70
  -2   1  -1   62.69    3.00
   2  -1   1   65.69    3.30
   2  -1   1   61.59    3.00
   2  -1   1   66.59    2.90
   2  -1   1   70.39    2.90
   2  -1   1   75.49    3.40
   2  -1   1   71.09    3.50
   3  -1   1 1873.21   62.09
   3  -1   1 1905.41   62.69
   3  -1   1 1946.61   62.09
   3  -1   1 2027.20   63.19
   3  -1   1 1868.41   62.89
   3  -1   1 2009.40   63.09
   4  -1   1 2112.39   68.49
   4  -1   1 2096.69   68.29
   4  -1   1 2065.49   68.19
   4  -1   1 2112.39   68.69
   5  -1   1  264.07    9.90
   5  -1   1  240.08   10.20
   5  -1   1  249.58    9.90
   5  -1   1  240.28    8.60
   5  -1   1  262.67   10.40
   6  -1   1   84.39    5.00
   6  -1   1  102.79    5.70
   6  -1   1   84.19    5.30
   6  -1   1   86.99    3.50
   6  -1   1   84.29    4.80
   7  -1   1   23.30    3.10
   7  -1   1   27.80    1.70
   7  -1   1   27.80    3.40
   7  -1   1   22.20    3.10
   7  -1   1   26.50    3.00
   8  -1   1  173.78    9.00
   8  -1   1  172.18    8.60
   8  -1   1  174.48    9.10
   8  -1   1  172.58    6.20
   8  -1   1  174.18    8.10
   9  -1   1  816.42   30.60
   9  -1   1  849.12   29.40
   9  -1   1  825.42   30.70
   9  -1   1  835.82   30.20
  10  -1   1   23.30    3.80
  10  -1   1   20.40    3.90
  10  -1   1   16.30    3.60
  10  -1   1   21.50    3.20
  11  -1   1  206.48   10.00
  11  -1   1  212.08   11.10
  11  -1   1  205.78   11.50
  11  -1   1  218.68   11.70
  12  -1   1   23.50    4.60
  12  -1   1   21.00    4.40
  12  -1   1   20.20    4.20
  12  -1   1   19.80    3.30
  13  -1   1   45.30    6.20
  13  -1   1   45.40    6.40
  13  -1   1   45.00    6.50
  13  -1   1   41.30    4.70
  14  -1   1   34.50    6.20
  14  -1   1   34.50    5.70
  14  -1   1   23.20    5.20
  14  -1   1   32.90    4.30
  15  -1   1    2.00    3.80
  15  -1   1    5.80    3.60
  15  -1   1   -0.40    3.90
  16  -1   1   83.69    9.60
  16  -1   1  107.59   11.40
  16  -1   1  120.29   10.00
  17  -1   1  133.19   13.30
  17  -1   1  127.49   12.60
  17  -1   1  128.49   11.40
  17   0  -1   67.69    9.50
  17   0  -1   55.99    8.40
  17   0  -1   44.00    7.60
  16   0  -1  170.38   12.10
  16   0  -1  166.28   12.50
  16   0  -1  188.98   13.20
  15   0  -1   16.50    4.90
  15   0  -1   12.50    4.50
  15   0  -1    7.80    4.00
  14   0  -1   98.29    8.60
  14   0  -1   95.89    9.50
  14   0  -1   87.49    8.70
  13   0  -1  161.58   10.60
  13   0  -1  169.18   10.80
  13   0  -1  159.08   10.20
  12   0  -1   59.99    6.40
  12   0  -1   77.89    6.70
  11   0  -1  133.89    6.70
  11   0  -1  138.29    8.60
  11   0  -1  138.79    9.00
  11   0  -1  128.99    8.40
  10   0  -1    5.90    2.60
  10   0  -1    5.70    1.80
  10   0  -1    3.80    2.50
  10   0  -1    3.70    2.50
   9   0  -1   19.40    3.30
   9   0  -1   22.50    3.60
   9   0  -1   22.40    3.50
   9   0  -1   23.00    2.60
   8   0  -1  634.64   23.70
   8   0  -1  635.74   23.60
   8   0  -1  656.53   24.00
   8   0  -1  641.14   22.30
   7   0  -1  474.65   18.10
   7   0  -1  484.15   16.90
   7   0  -1  481.05   18.00
   7   0  -1  465.95   17.90
   6   0  -1  362.76   12.80
   6   0  -1  352.06   13.60
   6   0  -1  359.56   11.70
   6   0  -1  360.06   13.80
   6   0  -1  330.67   13.60
   5   0  -1  306.37   10.70
   5   0  -1  328.57   12.40
   5   0  -1  325.17   11.50
   5   0  -1  334.67   12.50
   5   0  -1  321.57   12.30
  -5   0   1  345.87   10.90
   4   0  -1  121.49    5.40
   4   0  -1  124.99    5.40
   4   0  -1  117.19    4.70
   4   0  -1  116.19    4.10
   4   0  -1  111.39    5.40
   4   0  -1  111.79    4.90
  -4   0   1  111.39    4.10
   3   0  -1  357.56   12.50
   3   0  -1  377.56   12.90
   3   0  -1  368.36   12.90
   3   0  -1  367.36   12.90
   3   0  -1  364.56   12.90
   3   0  -1  361.76   12.20
  -3   0   1  368.06   12.00
   2   0  -1   17.60    1.50
   2   0  -1   15.70    1.40
   2   0  -1   13.70    1.30
   2   0  -1   16.30    1.30
   2   0  -1   15.40    1.40
  -2   0   1   12.80    0.90
   1   0  -1    1.00    0.60
   1   0  -1    0.60    0.50
   1   0  -1    0.40    0.50
   1   0  -1    1.00    0.60
   1   0  -1    1.90    0.60
   0   0  -1  941.31   29.60
   0   0   1  900.21   29.80
  -1   0  -1    0.90    0.60
  -1   0  -1    2.30    0.70
   1   0   1    1.70    0.70
   1   0   1    1.60    0.70
   1   0   1    1.90    0.60
   1   0   1    0.20    0.50
  -2   0  -1 1331.27   43.50
   2   0   1 1309.07   43.40
   2   0   1 1474.35   44.00
   2   0   1 1345.17   43.70
   2   0   1 1320.97   43.40
   2   0   1 1294.67   43.80
   3   0   1   35.40    2.70
   3   0   1   36.50    2.70
   3   0   1   36.40    2.30
   3   0   1   40.70    2.00
   3   0   1   42.10    2.90
   3   0   1   34.30    2.30
   3   0   1   43.60    2.90
   4   0   1   35.90    2.00
   4   0   1   34.10    2.90
   4   0   1   36.80    2.20
   4   0   1   33.90    2.90
   4   0   1   39.80    3.10
   4   0   1   35.70    2.90
   4   0   1   36.10    2.20
   5   0   1    1.50    1.60
   5   0   1   -1.10    1.30
   6   0   1  542.85   17.70
   6   0   1  541.05   19.60
   6   0   1  523.15   19.40
   6   0   1  513.35   19.50
   6   0   1  531.05   19.20
   7   0   1  216.28    9.50
   7   0   1  205.68    9.90
   7   0   1  222.38    9.90
   7   0   1  225.38   10.10
   7   0   1  224.98    7.90
   8   0   1  254.27   11.60
   8   0   1  255.47   11.70
   8   0   1  255.47   11.10
   8   0   1  273.37   11.80
   8   0   1  263.57    9.20
   9   0   1   44.20    4.90
   9   0   1   44.80    5.00
   9   0   1   41.90    2.40
   9   0   1   43.40    4.20
   9   0   1   40.60    4.80
  10   0   1  308.07   14.30
  10   0   1  287.17   13.90
  10   0   1  313.17   14.00
  10   0   1  303.77   13.00
  10   0   1  309.07   10.60
  11   0   1   -3.40    2.60
  11   0   1   -0.60    2.70
  11   0   1    0.30    2.00
  11   0   1    0.00    2.80
  12   0   1    2.90    2.20
  12   0   1   -0.30    3.00
  12   0   1    2.10    2.90
  12   0   1    3.00    2.90
  13   0   1  107.79    7.50
  13   0   1  123.69    9.30
  13   0   1  111.39    9.30
  13   0   1  118.19    8.90
  14   0   1   -2.10    3.20
  14   0   1    3.10    3.50
  14   0   1   -0.20    3.60
  14   0   1    6.40    2.80
  15   0   1   24.00    5.30
  15   0   1   16.50    3.50
  15   0   1   26.20    6.00
  15   0   1   22.20    5.50
  16   0   1  276.37   15.60
  16   0   1  253.77   15.40
  16   0   1  249.68   15.60
  17   0   1    4.00    4.90
  17   0   1    2.90    4.90
  17   0   1    3.20    5.40
  17  -1  -1  266.37   15.90
  17  -1  -1  273.07   16.50
  17  -1  -1  263.97   16.90
  16  -1  -1  152.48   11.90
  16  -1  -1  178.88   12.00
  16  -1  -1  174.18   12.80
  15  -1  -1    3.90    3.50
  15  -1  -1    6.30    3.50
  15  -1  -1    2.30    3.60
  14  -1  -1   13.30    4.40
  14  -1  -1    6.70    3.70
  14  -1  -1   10.80    4.00
  13  -1  -1    3.70    2.90
  13  -1  -1    1.20    2.90
  13  -1  -1    1.80    3.20
  12  -1  -1  281.87   14.10
  12  -1  -1  290.17   13.80
  12  -1  -1  258.67   13.90
  11  -1  -1  178.48   10.30
  11  -1  -1  170.28   10.30
  11  -1  -1  187.68   10.00
  10  -1  -1   60.69    6.00
  10  -1  -1   37.80    4.50
  10  -1  -1   42.40    4.90
   9  -1  -1   49.40    5.10
   9  -1  -1   53.39    4.70
   9  -1  -1   51.99    5.30
   8  -1  -1  498.55   19.50
   8  -1  -1  512.95   19.20
   8  -1  -1  504.35   19.50
   7  -1  -1   18.70    2.80
   7  -1  -1   21.80    3.00
   7  -1  -1   23.20    3.00
   6  -1  -1 1220.58   41.40
   6  -1  -1 1203.48   41.30
   6  -1  -1 1232.58   41.10
   5  -1  -1  576.14   20.50
   5  -1  -1  578.34   20.40
   5  -1  -1  590.44   20.20
   5  -1  -1  556.84   20.40
   4  -1  -1  458.15   16.50
   4  -1  -1  479.65   16.20
   4  -1  -1  465.35   16.40
   4  -1  -1  465.35   16.50
   4  -1  -1  451.65   16.10
   3  -1  -1 2558.74   81.99
   3  -1  -1 2448.56   82.09
   3  -1  -1 2590.24   82.19
   3  -1  -1 2512.85   81.89
   3  -1  -1 2616.04   82.29
   2  -1  -1 1065.39   36.90
   2  -1  -1 1173.28   36.90
   2  -1  -1 1179.38   37.10
   2  -1  -1 1147.79   36.80
   2  -1  -1 1144.49   37.00
  -2   1   1 1103.49   36.40
   1  -1  -1  766.52   24.60
   1  -1  -1  748.23   24.60
   1  -1  -1  736.23   24.60
   1  -1  -1  761.02   24.40
   1  -1  -1  769.92   24.40
   1  -1  -1  718.13   24.40
  -1   1   1  772.82   24.60
  -1   1   1  752.72   24.40
   0  -1  -1 1378.26   44.20
   0  -1  -1 1339.07   44.20
   0  -1  -1 1449.55   44.50
   0  -1  -1 1240.68   44.20
   0   1   1 1467.35   44.40
   0   1   1 1344.87   44.50
   0   1   1 1455.05   44.20
   0   1   1 1336.67   44.20
  -1  -1  -1  603.84   20.50
  -1  -1  -1  653.83   20.90
  -1  -1  -1  609.64   21.20
   1   1   1  698.63   21.30
   1   1   1  631.14   20.90
   1   1   1  639.94   20.80
   1   1   1  616.34   21.00
   1   1   1  635.64   20.80
  -2  -1  -1 1321.77   43.90
  -2  -1  -1 1355.66   43.40
   2   1   1 1405.26   43.40
   2   1   1 1329.27   43.70
   2   1   1 1290.07   43.20
   2   1   1 1313.97   43.40
   2   1   1 1377.16   43.60
   2   1   1 1236.68   43.80
  -3  -1  -1    3.10    1.10
   3   1   1    5.00    1.50
   3   1   1    3.10    1.00
   3   1   1    2.20    1.20
   3   1   1    2.20    1.20
   3   1   1    3.70    0.90
   3   1   1    4.00    1.00
   3   1   1    2.60    1.20
   4   1   1    3.90    1.10
   4   1   1    5.20    1.50
   4   1   1    4.60    1.50
   4   1   1    5.30    1.50
   4   1   1    3.20    1.00
   4   1   1    4.10    1.50
   4   1   1    6.40    1.10
   5   1   1 1341.07   45.40
   5   1   1 1325.17   45.30
   5   1   1 1319.97   44.00
   5   1   1 1382.16   44.00
   5   1   1 1366.26   45.20
   5   1   1 1357.06   44.10
   5   1   1 1387.16   45.30
   6   1   1   56.69    4.40
   6   1   1   52.99    4.10
   6   1   1   56.69    4.10
   6   1   1   59.29    4.30
   6   1   1   49.50    2.90
   6   1   1   51.79    2.80
   7   1   1  199.88    9.10
   7   1   1  197.48    9.30
   7   1   1  197.48    9.20
   7   1   1  205.68    7.60
   7   1   1  184.78    9.20
   8   1   1    1.40    1.00
   8   1   1    1.70    1.90
   8   1   1   -1.00    1.70
   8   1   1    1.90    1.90
   8   1   1   -0.90    1.50
   9   1   1   69.39    5.40
   9   1   1   79.99    6.10
   9   1   1   81.59    6.10
   9   1   1   67.39    5.60
   9   1   1   76.19    3.70
  10   1   1   18.20    3.70
  10   1   1   12.60    3.20
  10   1   1   13.10    3.40
  10   1   1   15.90    1.80
  10   1   1   14.90    3.00
  11   1   1  279.67   12.80
  11   1   1  286.67   13.90
  11   1   1  270.27   13.50
  11   1   1  270.67   13.50
  12   1   1   70.79    7.50
  12   1   1   61.29    7.00
  12   1   1   71.19    7.20
  12   1   1   69.59    6.10
  13   1   1   99.99    8.50
  13   1   1   99.59    7.20
  13   1   1   95.69    9.20
  13   1   1   84.89    8.60
  14   1   1    6.40    3.90
  14   1   1   11.70    4.20
  14   1   1   10.60    3.40
  14   1   1   12.20    4.70
  15   1   1  121.29   10.30
  15   1   1  112.59    8.10
  15   1   1  119.89   10.10
  15   1   1  123.89   10.30
  16   1   1    6.40    4.70
  16   1   1    2.00    2.70
  16   1   1    2.90    5.00
  16   1   1    1.40    3.90
  17   1   1   46.60    8.90
  17   1   1   53.09    8.60
  17   1   1   61.09    8.60
  17  -2  -1    1.70    4.80
  17  -2  -1    6.80    4.80
  17  -2  -1   10.00    5.10
  16  -2  -1  106.49   10.70
  16  -2  -1  107.99   10.80
  16  -2  -1  131.79   10.10
  15  -2  -1   12.50    4.80
  15  -2  -1   18.80    5.00
  14  -2  -1   98.59    9.70
  14  -2  -1  107.39    8.50
  14  -2  -1  104.99    9.00
  13  -2  -1   48.80    5.90
  13  -2  -1   42.10    6.00
  13  -2  -1   54.69    7.00
  11  -2  -1   12.80    3.30
  11  -2  -1    6.90    3.20
  11  -2  -1    8.20    3.30
   9  -2  -1   49.99    4.80
   9  -2  -1   64.49    5.20
   9  -2  -1   52.29    5.20
   8  -2  -1   -0.40    1.80
   8  -2  -1    2.80    2.10
   8  -2  -1    3.60    1.90
   7  -2  -1   36.00    3.80
   7  -2  -1   38.50    3.90
   7  -2  -1   44.80    3.70
   6  -2  -1 2730.43   88.29
   6  -2  -1 2679.33   87.89
   6  -2  -1 2688.03   88.59
   6  -2  -1 2698.63   88.49
   5  -2  -1 1304.97   43.60
   5  -2  -1 1300.67   43.40
   5  -2  -1 1286.87   43.20
   5  -2  -1 1288.57   42.80
   4  -2  -1  859.11   28.00
   4  -2  -1  794.42   26.50
   4  -2  -1  790.82   28.00
   4  -2  -1  824.02   27.40
   4  -2  -1  842.02   27.80
  -4   2   1  830.52   26.50
   3  -2  -1 1201.18   38.50
   3  -2  -1 1167.08   38.80
   3  -2  -1 1139.59   38.70
   3  -2  -1 1196.88   38.90
   3  -2  -1 1174.78   38.20
  -3   2   1 1166.18   37.80
   2  -2  -1 1493.25   47.40
   2  -2  -1 1498.05   47.90
   2  -2  -1 1481.15   47.80
   2  -2  -1 1440.26   47.20
   2  -2  -1 1436.26   47.70
   2  -2  -1 1461.15   47.40
  -2   2   1 1459.85   47.20
   1  -2  -1   11.40    1.20
   1  -2  -1   11.90    1.00
   1  -2  -1   11.80    1.10
   1  -2  -1   13.90    1.40
   1  -2  -1   11.00    0.90
   1  -2  -1   12.80    1.40
  -1   2   1   12.90    1.10
  -1   2   1   10.10    1.00
  -1   2   1   11.80    0.90
   0  -2  -1 1175.68   38.70
   0  -2  -1 1201.18   38.30
   0  -2  -1 1250.07   38.30
   0   2   1 1055.39   39.00
   0   2   1 1163.98   38.30
   0   2   1 1246.98   38.40
  -1  -2  -1   20.90    1.30
   1   2   1   19.40    1.40
   1   2   1   20.80    1.80
   1   2   1   17.50    1.60
   1   2   1   23.00    1.40
   1   2   1   20.50    1.90
  -2  -2  -1 9338.97  287.07
  -2  -2  -1 9999.00  289.97
   2   2   1 8920.61  287.17
   2   2   1 8569.34  287.47
   2   2   1 8928.01  289.27
   2   2   1 8819.22  288.97
   2   2   1 7997.00  287.67
   2   2   1 9482.25  288.37
  -3  -2  -1   71.69    3.60
   3   2   1   77.89    4.30
   3   2   1   68.29    3.60
   3   2   1   61.59    3.30
   3   2   1   60.09    3.70
   3   2   1   74.59    3.50
   3   2   1   62.39    3.60
   3   2   1   64.39    3.40
  -4  -2  -1  509.65   18.70
   4   2   1  542.55   18.60
   4   2   1  562.64   18.70
   4   2   1  531.65   18.80
   4   2   1  552.24   19.20
   4   2   1  576.14   19.70
   4   2   1  531.55   18.50
   4   2   1  542.95   19.40
  -5  -2  -1  417.76   15.70
   5   2   1  419.46   15.20
   5   2   1  446.36   15.20
   5   2   1  484.75   16.70
   5   2   1  457.85   15.20
   5   2   1  403.86   16.00
   5   2   1  415.36   16.20
   5   2   1  426.46   15.80
   6   2   1 1004.80   34.20
   6   2   1 1045.70   34.80
   6   2   1  953.10   33.10
   6   2   1 1013.60   33.30
   6   2   1 1014.70   33.10
   6   2   1  999.60   34.80
   6   2   1  979.10   34.50
   7   2   1  176.68    8.30
   7   2   1  176.98    8.70
   7   2   1  175.58    8.70
   7   2   1  174.28    7.10
   7   2   1  181.28    8.60
   7   2   1  166.28    6.80
   8   2   1  463.15   17.70
   8   2   1  438.26   15.80
   8   2   1  438.56   17.40
   8   2   1  424.86   17.60
   8   2   1  457.65   18.10
   9   2   1   51.09    3.20
   9   2   1   48.00    5.00
   9   2   1   53.09    5.50
   9   2   1   55.89    5.00
   9   2   1   44.00    5.00
  10   2   1  132.79    8.10
  10   2   1  128.79    5.80
  10   2   1  134.39    8.10
  10   2   1  125.99    8.40
  10   2   1  126.09    8.40
  11   2   1   21.10    3.90
  11   2   1   23.70    2.40
  11   2   1   19.70    4.20
  11   2   1   20.20    4.20
  11   2   1   21.40    4.00
  12   2   1  261.07   13.90
  12   2   1  259.77   12.70
  12   2   1  259.37   13.10
  12   2   1  264.47   14.00
  13   2   1   19.00    4.50
  13   2   1   17.40    4.80
  13   2   1   16.00    4.20
  13   2   1   18.00    3.90
  14   2   1   56.89    7.90
  14   2   1   51.99    6.70
  14   2   1   49.10    5.70
  14   2   1   43.50    6.50
  15   2   1    6.30    4.20
  15   2   1    2.80    3.60
  15   2   1    2.40    2.70
  15   2   1    4.90    3.50
  16   2   1   20.80    5.70
  16   2   1   30.90    5.10
  16   2   1   33.70    7.60
  16   2   1   39.80    7.20
  17   2   1   30.90    5.10
  17   2   1   32.40    6.70
  17   2   1   31.60    7.60
  17   2   1   46.50    8.90
  17  -3  -1  231.38   15.60
  17  -3  -1  233.58   14.00
  17  -3  -1  237.58   16.20
  16  -3  -1    4.70    4.70
  16  -3  -1   -1.50    4.10
  16  -3  -1    1.70    3.80
  15  -3  -1   83.69    9.00
  15  -3  -1   79.49    7.90
  15  -3  -1   83.99    9.10
  14  -3  -1   -1.40    3.10
  14  -3  -1   -1.90    3.30
  14  -3  -1    1.50    2.80
  13  -3  -1  364.76   17.50
  13  -3  -1  358.66   17.80
  13  -3  -1  374.36   16.70
  12  -3  -1    3.40    2.70
  12  -3  -1    6.10    3.20
  12  -3  -1    1.80    3.00
  11  -3  -1  317.37   15.40
  11  -3  -1  334.77   14.40
  11  -3  -1  332.97   15.40
   9  -3  -1  406.26   17.80
   9  -3  -1  454.05   17.00
   9  -3  -1  439.96   17.60
   8  -3  -1    8.70    2.20
   8  -3  -1   13.10    2.80
   8  -3  -1   13.40    3.00
   7  -3  -1   14.80    2.90
   7  -3  -1   16.80    2.40
   7  -3  -1   16.80    3.00
   7  -3  -1   13.30    2.80
   6  -3  -1   52.29    3.50
   6  -3  -1   48.70    3.80
   6  -3  -1   55.39    4.20
   6  -3  -1   50.29    4.30
   5  -3  -1 2123.59   70.59
   5  -3  -1 2123.79   70.29
   5  -3  -1 2188.88   69.89
   5  -3  -1 2142.19   70.89
  -5   3   1 2171.68   68.89
   4  -3  -1   50.19    3.70
   4  -3  -1   45.90    3.30
   4  -3  -1   41.50    2.60
   4  -3  -1   45.70    3.10
   4  -3  -1   43.90    2.60
  -4   3   1   48.90    2.30
   3  -3  -1 1025.20   33.70
   3  -3  -1 1020.40   34.10
   3  -3  -1 1027.70   33.70
   3  -3  -1 1027.40   34.30
   3  -3  -1 1012.10   33.30
  -3   3   1 1022.30   33.40
   2  -3  -1   83.59    4.20
   2  -3  -1   89.69    4.20
   2  -3  -1   86.99    3.60
   2  -3  -1   83.09    4.00
  -2   3   1   85.09    3.80
   1  -3  -1 1247.28   40.20
   1  -3  -1 1281.97   41.20
   1  -3  -1 1240.68   40.80
   1  -3  -1 1264.97   41.40
   1  -3  -1 1248.78   40.70
   1  -3  -1 1270.27   40.90
  -1   3   1 1248.08   41.00
  -1   3   1 1249.57   40.80
  -1   3   1 1264.27   40.20
   0  -3  -1  555.64   19.20
   0  -3  -1  587.04   19.90
   0  -3  -1  596.24   19.30
   0  -3  -1  569.74   19.10
   0   3   1  591.64   19.00
   0   3   1  554.74   18.40
   0   3   1  582.04   19.30
   0   3   1  538.35   19.20
  -1  -3  -1  967.90   29.50
  -1  -3  -1  887.61   30.00
  -1  -3  -1  868.51   30.60
   1   3   1  926.41   29.90
   1   3   1  760.72   30.40
   1   3   1  914.51   29.90
   1   3   1  945.71   29.40
   1   3   1  944.61   30.10
  -2  -3  -1  143.79    6.20
  -2  -3  -1  140.19    5.10
  -2  -3  -1  137.59    6.80
   2   3   1  141.29    6.20
   2   3   1  148.89    6.10
   2   3   1  150.78    5.10
   2   3   1  145.29    5.80
   2   3   1  144.49    6.20
   2   3   1  168.08    7.00
   2   3   1  136.19    5.90
  -3  -3  -1  318.77   12.70
  -3  -3  -1  294.57   11.00
   3   3   1  281.37   11.60
   3   3   1  308.17   10.90
   3   3   1  284.97   11.20
   3   3   1  285.37   10.70
   3   3   1  277.27   10.80
   3   3   1  306.57   11.00
  -4  -3  -1  778.12   24.90
   4   3   1  725.83   24.60
   4   3   1  705.63   25.60
   4   3   1  733.13   24.90
   4   3   1  706.03   24.30
   4   3   1  711.83   24.50
   4   3   1  722.63   24.70
   4   3   1  693.33   25.20
  -5  -3  -1  605.84   21.20
   5   3   1  606.94   20.90
   5   3   1  579.54   21.80
   5   3   1  577.14   20.80
   5   3   1  602.04   21.50
   5   3   1  620.94   22.20
   5   3   1  617.74   21.10
   5   3   1  616.04   21.00
  -6  -3  -1   62.99    4.20
   6   3   1   72.09    4.10
   6   3   1   77.39    4.10
   6   3   1   73.29    4.40
   6   3   1   65.19    4.80
   6   3   1   71.59    5.20
   6   3   1   62.59    4.50
   6   3   1   68.99    3.80
   7   3   1  241.28   11.00
   7   3   1  235.78    9.40
   7   3   1  231.78   10.90
   7   3   1  239.68    9.10
   7   3   1  234.78    9.20
   7   3   1  229.98   10.00
   7   3   1  237.88   10.60
   8   3   1    5.10    2.30
   8   3   1    7.80    1.70
   8   3   1    8.20    2.50
   8   3   1   11.70    2.90
   8   3   1    6.70    2.10
   8   3   1   10.60    1.70
   9   3   1  430.76   18.00
   9   3   1  426.36   15.50
   9   3   1  428.46   17.00
   9   3   1  426.16   17.70
   9   3   1  409.96   17.50
  10   3   1    6.10    2.80
  10   3   1    6.90    1.70
  10   3   1    8.40    3.00
  10   3   1    5.40    2.80
  10   3   1    3.10    2.30
  11   3   1   94.19    7.80
  11   3   1   98.69    5.20
  11   3   1  100.49    8.10
  11   3   1   88.09    6.90
  11   3   1  107.39    7.50
  12   3   1   37.80    5.10
  12   3   1   34.00    5.70
  12   3   1   35.30    5.10
  12   3   1   48.30    6.50
  13   3   1   38.70    5.60
  13   3   1   54.49    6.40
  13   3   1   42.20    6.30
  13   3   1   43.50    6.50
  14   3   1    3.30    3.80
  14   3   1   -4.60    2.90
  14   3   1    1.90    3.00
  14   3   1   -0.70    2.40
  15   3   1   -4.00    3.70
  15   3   1    1.30    2.90
  15   3   1   -1.20    3.60
  15   3   1   -0.80    3.00
  16   3   1    1.10    3.20
  16   3   1    9.60    4.40
  16   3   1    1.90    5.00
  16   3   1    5.70    4.90
  17  -4  -1   19.70    6.60
  17  -4  -1    7.20    4.60
  17  -4  -1   15.40    6.30
  16  -4  -1   32.80    5.70
  16  -4  -1   39.00    7.00
  16  -4  -1   30.30    6.80
  15  -4  -1  118.49   10.60
  15  -4  -1  105.99    9.30
  15  -4  -1  108.19    8.60
  14  -4  -1   61.19    7.40
  14  -4  -1   58.09    7.90
  14  -4  -1   45.30    5.90
  13  -4  -1   81.89    6.90
  13  -4  -1   80.69    8.50
  13  -4  -1   88.59    8.50
  12  -4  -1  963.40   36.00
  12  -4  -1  932.21   35.30
  12  -4  -1  909.01   33.90
  11  -4  -1   82.69    7.40
  11  -4  -1   73.89    5.90
  11  -4  -1   78.79    6.70
  10  -4  -1  216.38   10.90
  10  -4  -1  205.18   11.30
  10  -4  -1  213.58   10.00
   9  -4  -1    2.10    2.50
   9  -4  -1    4.70    2.60
   9  -4  -1    2.50    1.80
   8  -4  -1  537.15   19.30
   8  -4  -1  502.15   19.90
   8  -4  -1  541.65   20.90
   7  -4  -1  113.99    6.30
   7  -4  -1  109.09    6.80
   7  -4  -1  111.09    6.50
   7  -4  -1  112.09    5.60
   6  -4  -1  241.28   10.80
   6  -4  -1  255.57   10.50
   6  -4  -1  240.48    9.40
   6  -4  -1  250.97   10.20
  -6   4   1  234.88    8.50
   5  -4  -1  473.95   17.10
   5  -4  -1  449.56   15.60
   5  -4  -1  459.15   16.70
   5  -4  -1  447.36   15.70
   5  -4  -1  437.26   16.20
   5  -4  -1  440.56   15.60
  -5   4   1  440.96   15.20
   4  -4  -1 1442.96   48.80
   4  -4  -1 1517.75   48.90
   4  -4  -1 1493.05   48.30
   4  -4  -1 1497.45   49.70
   4  -4  -1 1477.75   49.30
  -4   4   1 1503.95   48.40
   3  -4  -1  814.22   27.30
   3  -4  -1  793.72   26.40
   3  -4  -1  785.92   27.00
   3  -4  -1  800.72   27.00
  -3   4   1  798.52   26.50
   2  -4  -1    2.90    0.90
   2  -4  -1   -0.20    0.70
   2  -4  -1    0.70    1.00
   2  -4  -1    0.10    1.20
   2  -4  -1    0.60    0.70
   2  -4  -1   -0.20    1.10
  -2   4   1    0.20    0.90
   1  -4  -1  313.27   11.20
   1  -4  -1  315.77   11.20
   1  -4  -1  300.77   11.90
   1  -4  -1  312.17   11.20
  -1   4   1  331.87   11.50
  -1   4   1  319.57   11.30
   0  -4  -1   46.40    2.50
   0  -4  -1   51.09    3.80
   0  -4  -1   44.90    3.10
   0  -4  -1   47.50    3.10
   0   4   1   49.30    2.70
   0   4   1   61.19    3.30
  -1  -4  -1   25.20    2.50
  -1  -4  -1   23.20    2.80
   1   4   1   18.00    2.10
   1   4   1   21.50    2.20
   1   4   1   22.70    2.70
   1   4   1   21.30    1.50
   1   4   1   16.30    1.90
  -2  -4  -1  394.26   14.00
  -2  -4  -1  348.77   14.60
   2   4   1  397.06   14.00
   2   4   1  361.66   14.60
   2   4   1  392.36   13.90
   2   4   1  400.56   13.30
   2   4   1  389.76   13.90
  -3  -4  -1  139.19    6.50
  -3  -4  -1  141.29    7.20
   3   4   1  142.99    6.20
   3   4   1  138.49    6.50
   3   4   1  127.89    6.10
   3   4   1  146.09    7.20
   3   4   1  137.09    5.90
   3   4   1  136.99    6.30
  -4  -4  -1 1127.79   38.00
   4   4   1 1125.39   37.70
   4   4   1 1103.39   37.70
   4   4   1 1080.69   37.70
   4   4   1 1138.49   37.80
   4   4   1 1080.79   38.20
   4   4   1 1185.68   37.10
   4   4   1 1164.58   39.00
  -5  -4  -1   48.60    3.80
   5   4   1   47.80    4.40
   5   4   1   43.10    3.20
   5   4   1   46.10    3.60
   5   4   1   47.50    3.30
   5   4   1   46.40    3.10
   5   4   1   49.70    3.70
   5   4   1   46.00    4.10
  -6  -4  -1   67.69    4.80
   6   4   1   79.09    4.60
   6   4   1   73.09    4.30
   6   4   1   73.79    4.30
   6   4   1   77.89    5.00
   6   4   1   71.49    5.10
   6   4   1   81.69    4.50
   6   4   1   72.19    5.50
  -7  -4  -1  214.58    9.60
   7   4   1  211.58   10.00
   7   4   1  222.08    9.40
   7   4   1  215.78    8.90
   7   4   1  213.18   10.40
   7   4   1  220.18    9.10
   7   4   1  216.98    9.10
   7   4   1  239.38   11.00
  -8  -4  -1    3.90    1.60
   8   4   1    2.00    1.20
   8   4   1    3.00    1.60
   8   4   1    2.70    1.50
   8   4   1    4.10    1.80
   8   4   1    1.00    2.10
   8   4   1    1.70    2.10
   8   4   1    5.00    2.70
   9   4   1   54.09    3.60
   9   4   1   58.39    3.50
   9   4   1   60.19    4.70
   9   4   1   59.59    4.10
   9   4   1   43.00    4.90
   9   4   1   45.10    5.20
   9   4   1   47.70    5.50
  10   4   1  305.77   14.20
  10   4   1  301.17   11.90
  10   4   1  295.87   14.50
  10   4   1  291.27   13.90
  10   4   1  289.27   13.10
  11   4   1   45.20    5.20
  11   4   1   33.10    5.10
  11   4   1   45.60    6.20
  11   4   1   43.70    5.40
  11   4   1   45.40    4.00
  12   4   1  546.35   23.40
  12   4   1  583.74   22.90
  12   4   1  542.05   23.60
  12   4   1  592.04   24.60
  13   4   1   38.70    5.40
  13   4   1   49.99    6.30
  13   4   1   37.80    6.30
  13   4   1   31.00    5.60
  14   4   1    4.20    2.90
  14   4   1    0.40    2.70
  14   4   1    5.60    4.20
  14   4   1   -2.80    3.30
  15   4   1   49.99    6.60
  15   4   1   61.59    7.30
  15   4   1   52.89    7.90
  15   4   1   57.29    8.40
  16   4   1  164.08   13.20
  16   4   1  153.98   13.20
  16   4   1  151.58   10.90
  16   4   1  152.78   11.50
  17  -5  -1   18.80    5.10
  17  -5  -1   17.70    7.10
  17  -5  -1   22.30    6.90
  16  -5  -1   -0.70    4.50
  16  -5  -1    5.40    3.70
  16  -5  -1   -0.50    4.60
  15  -5  -1  226.48   12.40
  15  -5  -1  211.38   14.30
  15  -5  -1  238.58   14.10
  14  -5  -1   36.00    5.10
  14  -5  -1   35.50    5.90
  14  -5  -1   41.80    7.10
  13  -5  -1  313.17   15.90
  13  -5  -1  338.77   14.80
  13  -5  -1  308.47   16.50
  12  -5  -1    8.10    3.70
  12  -5  -1    9.00    3.50
  12  -5  -1    8.50    2.70
  11  -5  -1  256.27   13.40
  11  -5  -1  235.58   11.20
  11  -5  -1  241.28   12.20
  10  -5  -1   20.10    3.70
  10  -5  -1   26.30    3.30
  10  -5  -1   17.90    3.80
   9  -5  -1  319.57   13.60
   9  -5  -1  299.47   14.20
   9  -5  -1  304.77   12.40
   8  -5  -1  124.19    7.30
   8  -5  -1  117.09    7.50
   8  -5  -1  119.19    6.00
   8  -5  -1  114.79    6.80
   7  -5  -1 2256.87   73.59
   7  -5  -1 2149.69   71.19
   7  -5  -1 2155.58   71.39
   7  -5  -1 2194.18   72.89
   7  -5  -1 2188.98   72.49
  -7   5   1 2193.58   70.59
   6  -5  -1  142.89    6.60
   6  -5  -1  160.48    6.40
   6  -5  -1  160.68    8.00
   6  -5  -1  151.98    6.70
   6  -5  -1  158.08    7.30
   6  -5  -1  151.48    7.60
  -6   5   1  155.38    6.10
   5  -5  -1  648.44   21.50
   5  -5  -1  623.64   22.30
   5  -5  -1  619.24   22.80
   5  -5  -1  614.24   23.20
   5  -5  -1  631.24   22.30
  -5   5   1  711.53   21.90
   4  -5  -1  278.07   10.40
   4  -5  -1  278.67   10.90
   4  -5  -1  278.17   11.30
   4  -5  -1  280.47    9.70
   4  -5  -1  293.67   11.10
  -4   5   1  274.17   10.30
   3  -5  -1 1061.19   35.60
   3  -5  -1 1003.80   35.60
   3  -5  -1 1047.80   34.50
   3  -5  -1 1090.99   35.30
  -3   5   1 1071.49   35.10
   2  -5  -1 1761.42   58.69
   2  -5  -1 1757.32   58.99
   2  -5  -1 1829.42   59.19
   2  -5  -1 1821.32   58.09
   2  -5  -1 1817.62   58.69
   2  -5  -1 1811.72   59.79
  -2   5   1 1911.91   59.59
  -2   5   1 1763.02   59.09
   1  -5  -1  813.32   31.80
   1  -5  -1  903.91   31.00
   1  -5  -1  920.11   31.10
   1  -5  -1  933.11   30.90
  -1   5   1  947.11   31.30
  -1   5   1  981.90   31.30
  -1   5   1 1011.00   30.50
   0  -5  -1  114.29    5.30
   0  -5  -1  105.79    6.00
   0  -5  -1  104.79    4.40
   0  -5  -1  108.89    5.20
   0   5   1  105.29    4.60
   0   5   1  114.49    5.30
   0   5   1  109.29    5.30
  -1  -5  -1    8.10    1.60
  -1  -5  -1   13.70    2.60
   1   5   1   10.30    1.10
   1   5   1   11.90    1.70
   1   5   1    6.30    1.50
   1   5   1   12.40    2.00
  -2  -5  -1    1.30    1.50
  -2  -5  -1   -0.30    1.20
   2   5   1    2.60    1.40
   2   5   1    1.10    1.00
   2   5   1    1.20    1.40
   2   5   1    1.80    1.40
   2   5   1    0.60    1.40
  -3  -5  -1  316.67   13.20
  -3  -5  -1  316.47   12.10
   3   5   1  303.87   11.90
   3   5   1  297.47   12.00
   3   5   1  301.47   11.30
   3   5   1  304.47   12.00
   3   5   1  318.97   13.10
  -4  -5  -1  174.88   10.20
  -4  -5  -1  192.18    8.60
   4   5   1  197.48    8.10
   4   5   1  203.28    8.50
   4   5   1  201.68    9.50
   4   5   1  195.08    8.30
   4   5   1  179.98    8.60
   4   5   1  199.88    7.30
   4   5   1  191.48    8.30
  -5  -5  -1   22.90    2.80
   5   5   1   30.10    3.30
   5   5   1   26.70    3.40
   5   5   1   39.40    4.40
   5   5   1   35.70    3.00
   5   5   1   29.40    3.10
   5   5   1   25.40    2.40
   5   5   1   32.80    3.30
  -6  -5  -1  249.08   11.20
   6   5   1  269.07   12.00
   6   5   1  253.57   10.90
   6   5   1  274.17   11.00
   6   5   1  282.57   12.50
   6   5   1  285.87   10.90
   6   5   1  256.27   11.20
   6   5   1  273.27   10.50
  -7  -5  -1  102.69    6.20
   7   5   1   98.79    5.30
   7   5   1  102.49    5.60
   7   5   1  100.09    5.30
   7   5   1  108.39    7.00
   7   5   1   92.09    5.90
   7   5   1   92.09    5.50
   7   5   1   97.49    6.50
  -8  -5  -1    2.50    2.10
   8   5   1    1.80    1.60
   8   5   1    1.00    1.60
   8   5   1    0.10    1.10
   8   5   1    2.40    1.60
   8   5   1    2.90    2.50
   8   5   1    2.60    2.00
   8   5   1    1.80    2.00
   9   5   1  150.28    9.30
   9   5   1  153.58    7.20
   9   5   1  154.18    8.00
   9   5   1  144.69    8.60
   9   5   1  158.18    7.10
   9   5   1  163.88    7.70
   9   5   1  170.98    9.80
  10   5   1  512.25   21.80
  10   5   1  501.75   19.20
  10   5   1  489.65   19.80
  10   5   1  550.04   22.00
  10   5   1  527.05   21.30
  11   5   1  291.47   14.70
  11   5   1  284.27   11.80
  11   5   1  266.47   14.10
  11   5   1  272.17   13.70
  11   5   1  271.27   12.80
  12   5   1   74.19    7.30
  12   5   1   64.79    4.90
  12   5   1   69.89    7.80
  12   5   1   69.79    6.60
  12   5   1   65.19    7.40
  13   5   1  241.28   14.30
  13   5   1  246.58   13.50
  13   5   1  231.58   12.30
  13   5   1  239.28   13.60
  14   5   1   11.40    4.10
  14   5   1    9.80    4.70
  14   5   1    4.60    4.20
  14   5   1   14.00    3.80
  15   5   1   60.79    7.00
  15   5   1   62.99    8.70
  15   5   1   53.09    7.00
  15   5   1   53.39    8.10
  16   5   1   21.80    6.50
  16   5   1   17.60    5.00
  16   5   1   15.60    6.50
  17  -6  -1    4.50    5.90
  17  -6  -1   20.10    6.00
  16  -6  -1   -4.30    4.20
  16  -6  -1   -4.50    4.30
  15  -6  -1   42.30    7.50
  15  -6  -1   49.50    5.90
  15  -6  -1   39.40    6.80
  14  -6  -1   73.79    8.70
  14  -6  -1   84.59    8.80
  14  -6  -1   74.99    7.00
  13  -6  -1   33.40    5.80
  13  -6  -1   24.30    4.00
  13  -6  -1   34.30    6.30
  12  -6  -1   68.89    8.00
  12  -6  -1   87.29    8.10
  12  -6  -1   76.89    5.90
  11  -6  -1   -1.60    2.90
  11  -6  -1   -1.10    1.90
  11  -6  -1   -0.50    2.50
  10  -6  -1  122.19    7.80
  10  -6  -1  123.99    8.80
  10  -6  -1  129.89    6.80
   9  -6  -1    7.80    2.70
   9  -6  -1    5.80    1.90
   9  -6  -1    6.10    2.70
   8  -6  -1   20.50    2.40
   8  -6  -1   26.30    3.80
   8  -6  -1   23.90    4.00
   8  -6  -1   20.80    3.20
   8  -6  -1   22.40    2.40
  -8   6   1   20.60    2.00
   7  -6  -1    1.70    2.20
   7  -6  -1    4.70    1.90
   7  -6  -1    4.10    2.10
   7  -6  -1    2.00    1.30
   7  -6  -1    3.20    1.60
   7  -6  -1    4.10    1.40
  -7   6   1    3.70    1.20
   6  -6  -1 3459.05  111.09
   6  -6  -1 3455.25  111.69
   6  -6  -1 3403.46  110.49
   6  -6  -1 3360.96  109.29
   6  -6  -1 3262.27  110.19
  -6   6   1 3463.85  109.69
   5  -6  -1   47.90    3.80
   5  -6  -1   47.70    4.30
   5  -6  -1   46.00    3.40
   5  -6  -1   43.80    2.40
   5  -6  -1   48.70    3.80
  -5   6   1   47.00    3.20
   4  -6  -1  120.99    6.10
   4  -6  -1  125.89    6.50
   4  -6  -1  131.39    5.40
   4  -6  -1  118.39    6.30
  -4   6   1  114.49    5.60
   3  -6  -1    7.70    2.10
   3  -6  -1    8.40    1.30
   3  -6  -1    5.90    1.20
   3  -6  -1    4.00    1.40
   3  -6  -1    8.00    1.90
   3  -6  -1    6.70    1.20
  -3   6   1    5.50    1.60
   2  -6  -1  205.38    9.20
   2  -6  -1  199.08    8.00
   2  -6  -1  197.78    8.10
   2  -6  -1  198.08    7.00
   2  -6  -1  198.58    8.00
   2  -6  -1  204.48    8.30
  -2   6   1  211.18    8.50
  -2   6   1  216.68    7.20
  -2   6   1  203.88    8.40
   1  -6  -1   26.20    2.40
   1  -6  -1   26.60    2.70
   1  -6  -1   36.50    4.10
   1  -6  -1   28.60    2.80
  -1   6   1   25.70    2.80
  -1   6   1   25.70    1.90
  -1   6   1   27.90    2.70
   0  -6  -1  164.88    7.40
   0  -6  -1  157.58    8.30
   0  -6  -1  164.98    6.50
   0  -6  -1  163.28    7.40
   0   6   1  184.98    7.60
   0   6   1  181.18    7.60
   0   6   1  170.68    6.70
  -1  -6  -1   67.19    4.40
  -1  -6  -1   76.49    5.40
   1   6   1   64.49    4.40
   1   6   1   68.89    3.80
   1   6   1   69.29    4.40
   1   6   1   65.29    2.80
  -2  -6  -1  148.09    8.10
  -2  -6  -1  143.99    7.00
   2   6   1  146.69    7.10
   2   6   1  140.89    6.90
   2   6   1  140.49    5.80
   2   6   1  156.08    8.00
   2   6   1  141.19    6.70
  -3  -6  -1  328.77   12.40
  -3  -6  -1  304.37   13.30
   3   6   1  286.87   11.90
   3   6   1  284.27   11.80
   3   6   1  292.47   11.90
   3   6   1  300.97   13.20
   3   6   1  300.37   11.10
  -4  -6  -1  723.83   27.70
  -4  -6  -1  817.02   26.60
   4   6   1  669.63   27.20
   4   6   1  768.72   25.60
   4   6   1  767.12   26.30
   4   6   1  730.53   24.60
   4   6   1  701.33   26.30
   4   6   1  757.12   26.20
  -5  -6  -1  101.59    6.00
   5   6   1  103.39    6.30
   5   6   1  103.69    6.80
   5   6   1  107.19    6.00
   5   6   1   93.49    4.50
   5   6   1   98.19    5.60
   5   6   1  104.99    5.50
   5   6   1   98.79    5.50
  -6  -6  -1    6.50    2.10
   6   6   1    3.20    2.20
   6   6   1    5.90    1.90
   6   6   1    5.60    1.40
   6   6   1    3.90    1.90
   6   6   1    3.20    1.90
   6   6   1    5.50    1.90
   6   6   1    5.50    2.00
  -7  -6  -1  240.68   11.50
   7   6   1  262.67   12.40
   7   6   1  265.07   11.50
   7   6   1  273.17   10.50
   7   6   1  265.67   10.90
   7   6   1  253.07   11.10
   7   6   1  258.67   11.20
   7   6   1  270.97   12.90
  -8  -6  -1   56.69    5.30
   8   6   1   57.79    5.50
   8   6   1   60.59    6.30
   8   6   1   63.69    4.80
   8   6   1   66.69    6.20
   8   6   1   68.09    4.50
   8   6   1   61.89    4.80
   8   6   1   67.19    4.50
   9   6   1   49.60    5.40
   9   6   1   48.70    4.60
   9   6   1   50.69    6.30
   9   6   1   46.40    3.90
   9   6   1   53.29    6.20
   9   6   1   48.10    4.40
   9   6   1   44.70    4.30
  10   6   1  702.63   25.60
  10   6   1  683.73   25.40
  10   6   1  698.53   24.40
  10   6   1  735.83   28.20
  10   6   1  660.73   24.50
  10   6   1  691.23   26.90
  10   6   1  716.63   28.00
  11   6   1   23.30    4.60
  11   6   1   20.30    4.50
  11   6   1   14.00    4.60
  11   6   1   18.90    3.20
  11   6   1   20.70    3.70
  12   6   1  137.89    9.90
  12   6   1  140.19    9.60
  12   6   1  131.59    7.50
  12   6   1  128.59    8.20
  12   6   1  138.19   10.50
  13   6   1   43.70    5.40
  13   6   1   43.20    6.40
  13   6   1   48.20    7.00
  13   6   1   41.40    6.70
  14   6   1    2.90    3.30
  14   6   1    5.40    3.60
  14   6   1    0.00    3.50
  14   6   1   -3.20    3.40
  15   6   1   10.10    5.30
  15   6   1    7.40    4.00
  15   6   1    8.40    4.70
  16   6   1   66.99    9.00
  16   6   1   72.79    8.60
  16   6   1   51.69    9.20
  16  -7  -1    3.30    4.60
  16  -7  -1    0.70    5.30
  15  -7  -1    2.70    4.50
  15  -7  -1   19.00    5.10
  14  -7  -1   57.99    7.40
  14  -7  -1   48.20    7.80
  13  -7  -1  202.98   12.00
  13  -7  -1  209.48   10.40
  13  -7  -1  209.78   13.30
  12  -7  -1    5.80    3.30
  12  -7  -1    5.80    2.40
  12  -7  -1    8.70    4.00
  11  -7  -1    9.50    3.30
  11  -7  -1    9.30    3.80
  11  -7  -1    9.90    2.60
  10  -7  -1   18.60    3.40
  10  -7  -1   16.60    4.20
   9  -7  -1  258.37   13.30
   9  -7  -1  265.77   10.60
   9  -7  -1  268.17   12.60
   9  -7  -1  261.17   12.00
   8  -7  -1    2.30    2.60
   8  -7  -1    2.30    2.20
   8  -7  -1   -1.00    1.20
   8  -7  -1    0.40    1.30
   8  -7  -1   -1.00    1.00
   8  -7  -1    2.50    1.80
  -8   7   1   -2.20    1.00
   7  -7  -1  644.94   23.60
   7  -7  -1  631.64   22.60
   7  -7  -1  635.74   24.20
   7  -7  -1  625.14   22.80
   7  -7  -1  619.34   21.40
  -7   7   1  628.04   21.80
   6  -7  -1 1041.10   36.30
   6  -7  -1 1032.90   36.90
   6  -7  -1 1057.59   35.60
   6  -7  -1 1051.19   36.00
  -6   7   1 1036.50   35.10
   5  -7  -1  756.42   27.00
   5  -7  -1  726.23   26.60
   5  -7  -1  755.92   26.50
   5  -7  -1  759.62   25.60
  -5   7   1  729.93   25.70
   4  -7  -1  238.58   10.20
   4  -7  -1  238.88   10.40
   4  -7  -1  228.68    8.80
   4  -7  -1  228.08    9.70
  -4   7   1  232.88    9.50
   3  -7  -1  874.31   30.70
   3  -7  -1  866.31   28.40
   3  -7  -1  870.31   29.00
   3  -7  -1  860.81   29.90
   3  -7  -1  827.72   29.40
   3  -7  -1  873.11   28.90
  -3   7   1  875.31   29.70
   2  -7  -1  370.26   13.80
   2  -7  -1  350.96   13.60
   2  -7  -1  393.86   13.90
   2  -7  -1  380.76   15.20
   2  -7  -1  380.46   13.90
  -2   7   1  376.66   14.30
  -2   7   1  374.26   12.60
  -2   7   1  372.76   14.10
   1  -7  -1 3213.08  102.89
   1  -7  -1 3072.09  104.19
   1  -7  -1 3202.18  102.79
   1  -7  -1 3159.98  102.29
  -1   7   1 3145.59  103.09
  -1   7   1 3261.17  101.79
  -1   7   1 3110.89  102.99
   0  -7  -1  529.95   18.60
   0  -7  -1  539.55   19.70
   0  -7  -1  536.95   19.80
   0  -7  -1  528.15   21.00
   0   7   1  574.44   18.90
   0   7   1  565.54   20.00
   0   7   1  559.64   20.00
  -1  -7  -1  989.00   41.10
  -1  -7  -1 1263.87   40.50
   1   7   1 1255.17   40.50
   1   7   1 1203.88   38.30
   1   7   1 1254.87   39.60
   1   7   1 1148.29   40.30
  -2  -7  -1 1336.67   47.40
  -2  -7  -1 1263.57   45.90
   2   7   1 1388.86   44.30
   2   7   1 1401.66   46.00
   2   7   1 1404.36   46.10
   2   7   1 1358.96   45.50
  -3  -7  -1  134.29    8.20
  -3  -7  -1  118.59    7.00
   3   7   1  138.79    6.80
   3   7   1  128.99    6.90
   3   7   1  139.79    5.90
   3   7   1  136.59    7.10
  -4  -7  -1   38.00    4.20
  -4  -7  -1   42.10    5.60
   4   7   1   27.50    3.50
   4   7   1   34.00    2.90
   4   7   1   21.90    3.10
   4   7   1   29.90    4.10
   4   7   1   29.00    1.80
   4   7   1   24.30    3.20
  -5  -7  -1  500.15   25.20
  -5  -7  -1  470.65   18.60
   5   7   1  510.35   20.10
   5   7   1  500.15   18.30
   5   7   1  460.25   16.40
   5   7   1  489.15   18.50
   5   7   1  469.45   17.70
   5   7   1  461.45   18.70
   5   7   1  487.55   18.40
  -6  -7  -1  859.21   31.70
   6   7   1  871.91   31.00
   6   7   1  882.51   31.30
   6   7   1  847.52   33.00
   6   7   1  885.41   32.20
   6   7   1  934.01   31.70
   6   7   1  915.31   31.50
   6   7   1  897.61   29.70
  -7  -7  -1  238.98   11.10
   7   7   1  245.78   12.40
   7   7   1  225.18   10.50
   7   7   1  224.48    9.30
   7   7   1  228.68   11.60
   7   7   1  239.58   10.80
   7   7   1  239.78   10.70
   7   7   1  237.08   10.40
  -8  -7  -1   70.89    6.10
   8   7   1   68.39    4.90
   8   7   1   69.29    5.30
   8   7   1   80.59    7.40
   8   7   1   65.69    6.60
   8   7   1   71.99    4.40
   8   7   1   68.99    5.50
   8   7   1   71.79    5.40
   9   7   1  282.37   12.20
   9   7   1  297.37   14.70
   9   7   1  271.27   12.40
   9   7   1  275.77   11.60
   9   7   1  270.97   13.00
   9   7   1  281.67   11.90
   9   7   1  295.27   14.50
  10   7   1    4.00    2.50
  10   7   1   10.50    2.40
  10   7   1    3.60    2.10
  10   7   1    6.60    2.40
  10   7   1    8.80    3.30
  10   7   1   -1.10    2.90
  10   7   1    2.70    2.80
  11   7   1  106.29    5.90
  11   7   1  101.79    9.00
  11   7   1  117.49    9.30
  11   7   1  119.69    7.30
  11   7   1  107.49    8.30
  11   7   1  109.59    6.80
  12   7   1   29.90    6.10
  12   7   1   22.80    4.10
  12   7   1   25.20    5.10
  12   7   1   30.00    4.10
  12   7   1   14.00    4.40
  13   7   1   99.89    8.60
  13   7   1   99.89    9.40
  13   7   1   83.89    9.30
  14   7   1   27.80    5.90
  14   7   1   33.90    6.60
  15   7   1   52.09    7.90
  15   7   1   47.00    8.40
  16  -8  -1   54.19    8.10
  16  -8  -1   57.39    9.30
  15  -8  -1   37.00    7.40
  15  -8  -1   32.50    6.40
  14  -8  -1  132.89   10.20
  14  -8  -1  120.99   11.00
  13  -8  -1   63.49    8.30
  13  -8  -1   51.79    6.40
  12  -8  -1  202.28   11.20
  12  -8  -1  179.58   12.30
  11  -8  -1  253.17   10.80
  11  -8  -1  242.58   12.50
  11  -8  -1  276.87   14.50
  10  -8  -1  146.29   10.00
  10  -8  -1  157.08    7.10
  10  -8  -1  147.29    8.80
   9  -8  -1   21.50    3.90
   9  -8  -1   16.40    3.20
   9  -8  -1   18.20    4.10
   9  -8  -1   17.70    2.20
   9  -8  -1   17.40    2.60
   9  -8  -1   17.00    2.70
  -9   8   1   16.70    2.20
   8  -8  -1  366.66   15.90
   8  -8  -1  389.56   15.50
   8  -8  -1  386.86   13.60
   8  -8  -1  383.26   16.90
   8  -8  -1  380.26   15.00
   8  -8  -1  384.16   15.10
  -8   8   1  382.96   14.20
   7  -8  -1  316.27   14.20
   7  -8  -1  301.37   13.40
   7  -8  -1  303.87   12.90
   7  -8  -1  324.27   12.80
  -7   8   1  317.97   12.20
   6  -8  -1 1210.98   41.60
   6  -8  -1 1183.78   42.20
   6  -8  -1 1200.48   40.60
   6  -8  -1 1231.98   41.70
  -6   8   1 1199.68   40.60
   5  -8  -1   58.89    5.00
   5  -8  -1   55.19    3.60
   5  -8  -1   57.59    4.80
   5  -8  -1   55.99    4.40
  -5   8   1   70.09    4.30
   4  -8  -1   34.60    2.50
   4  -8  -1   31.10    3.70
   4  -8  -1   31.80    3.40
   4  -8  -1   44.40    4.80
  -4   8   1   38.20    3.70
   3  -8  -1  929.51   30.20
   3  -8  -1  865.81   32.00
   3  -8  -1  904.51   29.20
   3  -8  -1  869.01   30.20
   3  -8  -1  899.11   31.00
   3  -8  -1  865.71   30.60
  -3   8   1  892.31   30.90
  -3   8   1  917.81   31.10
   2  -8  -1   44.30    3.60
   2  -8  -1   29.00    3.90
   2  -8  -1   42.70    3.40
   2  -8  -1   40.30    3.40
   2  -8  -1   43.20    3.30
  -2   8   1   40.60    2.20
  -2   8   1   35.20    3.60
  -2   8   1   44.60    3.70
   1  -8  -1  381.36   14.60
   1  -8  -1  382.56   14.10
   1  -8  -1  387.96   14.90
   1  -8  -1  381.46   16.20
  -1   8   1  413.86   13.70
  -1   8   1  361.66   14.90
  -1   8   1  409.66   15.10
   0  -8  -1  260.17    9.70
   0  -8  -1  255.77   10.90
   0  -8  -1  243.78   12.20
   0  -8  -1  253.17   11.00
   0   8   1  274.77   10.00
   0   8   1  265.87   11.10
   0   8   1  280.57   11.20
  -1  -8  -1    5.70    2.60
  -1  -8  -1    3.60    1.80
   1   8   1    4.40    1.90
   1   8   1    2.90    1.90
   1   8   1    6.60    1.60
  -2  -8  -1  568.84   20.40
  -2  -8  -1  526.45   21.60
   2   8   1  536.55   20.10
   2   8   1  523.25   18.10
   2   8   1  544.75   20.20
   2   8   1  527.85   19.40
  -3  -8  -1    0.30    2.00
  -3  -8  -1    1.10    2.00
   3   8   1    2.40    1.20
   3   8   1   -0.20    1.50
   3   8   1    1.60    1.80
   3   8   1    0.80    1.50
   3   8   1    0.40    1.30
  -4  -8  -1  142.69    9.40
  -4  -8  -1  153.88    8.50
   4   8   1  159.68    8.10
   4   8   1  159.28    9.40
   4   8   1  150.38    8.00
   4   8   1  177.08    8.60
   4   8   1  165.88    7.10
  -5  -8  -1   20.80    3.60
  -5  -8  -1   20.30    3.80
   5   8   1   25.40    3.00
   5   8   1   14.70    3.00
   5   8   1   18.00    3.00
   5   8   1   25.00    4.70
   5   8   1   19.80    3.40
   5   8   1   17.10    3.00
   5   8   1   18.40    1.50
  -6  -8  -1    6.30    2.70
   6   8   1    5.30    1.90
   6   8   1    1.50    1.50
   6   8   1    0.70    1.80
   6   8   1    3.50    2.20
   6   8   1    4.20    1.20
   6   8   1    2.90    2.00
   6   8   1    3.30    2.20
  -7  -8  -1  344.57   15.40
   7   8   1  377.16   15.20
   7   8   1  368.76   16.00
   7   8   1  350.96   16.70
   7   8   1  313.47   14.50
   7   8   1  351.66   12.90
   7   8   1  381.66   14.90
   7   8   1  384.76   15.30
   8   8   1  145.49    8.20
   8   8   1  144.29    8.10
   8   8   1  145.69    9.30
   8   8   1  152.38    6.60
   8   8   1  142.69    8.20
   8   8   1  132.99    9.50
   9   8   1   33.50    3.20
   9   8   1   24.60    4.20
   9   8   1   23.10    3.70
   9   8   1   21.70    4.70
   9   8   1   30.50    4.10
   9   8   1   27.70    5.30
  10   8   1  197.68   12.10
  10   8   1  220.88   11.20
  10   8   1  159.28   11.20
  10   8   1  211.78   10.10
  10   8   1  231.78   15.70
  10   8   1  210.48   10.60
  11   8   1   33.90    6.00
  11   8   1   32.20    4.50
  11   8   1   26.20    3.60
  11   8   1   26.10    4.60
  11   8   1   24.10    3.20
  12   8   1   67.69    7.40
  12   8   1   41.70    7.00
  12   8   1   65.69    6.00
  13   8   1   29.00    6.60
  13   8   1   41.20    6.40
  14   8   1   15.20    5.80
  14   8   1   19.30    5.40
  15   8   1   14.50    6.80
  15   8   1    9.30    5.10
  16  -9  -1   11.00    6.30
  16  -9  -1   21.80    5.60
  15  -9  -1  373.16   20.20
  15  -9  -1  312.97   17.40
  14  -9  -1   -6.40    3.40
  14  -9  -1   -1.00    4.00
  13  -9  -1   42.70    6.00
  13  -9  -1   31.60    6.20
  12  -9  -1    2.90    2.90
  12  -9  -1   -1.00    3.50
  11  -9  -1  208.38   11.30
  11  -9  -1  222.08   13.10
  10  -9  -1    0.40    3.00
  10  -9  -1   -2.50    2.20
   9  -9  -1   12.90    3.70
   9  -9  -1   14.90    2.70
   9  -9  -1   12.20    2.90
   9  -9  -1   11.50    3.40
   9  -9  -1   16.10    2.90
  -9   9   1   11.60    2.30
   8  -9  -1   13.10    2.70
   8  -9  -1   13.40    3.30
   8  -9  -1   21.90    4.30
   8  -9  -1   16.20    3.00
  -8   9   1   11.20    2.20
   7  -9  -1  173.08    8.80
   7  -9  -1  147.79    8.30
   7  -9  -1  159.48    9.30
   7  -9  -1  166.58    7.80
  -7   9   1  162.18    7.60
   6  -9  -1   36.40    4.50
   6  -9  -1   29.90    3.80
   6  -9  -1   29.80    3.80
   6  -9  -1   32.50    3.20
  -6   9   1   31.10    3.50
   5  -9  -1    5.50    2.20
   5  -9  -1    5.00    1.50
   5  -9  -1    3.90    2.20
   5  -9  -1    3.50    1.90
   4  -9  -1   44.20    4.30
   4  -9  -1   46.40    3.10
   4  -9  -1   40.60    4.90
   4  -9  -1   44.80    3.80
   4  -9  -1   45.20    3.00
   4  -9  -1   45.10    2.70
  -4   9   1   44.30    4.20
   3  -9  -1   51.69    3.70
   3  -9  -1   47.10    4.00
   3  -9  -1   53.79    3.60
   3  -9  -1   51.29    5.00
   3  -9  -1   51.89    3.80
   3  -9  -1   50.79    2.30
  -3   9   1   60.39    4.50
  -3   9   1   51.39    4.30
   2  -9  -1   14.70    2.60
   2  -9  -1   12.20    2.10
   2  -9  -1   19.50    3.80
   2  -9  -1   14.50    2.40
   2  -9  -1   16.70    2.40
  -2   9   1   17.80    1.50
  -2   9   1   16.10    2.70
  -2   9   1   10.50    2.30
   1  -9  -1  115.49    6.10
   1  -9  -1  106.89    5.40
   1  -9  -1  117.69    7.60
   1  -9  -1  112.09    6.30
  -1   9   1  110.79    4.90
  -1   9   1  113.09    6.50
  -1   9   1  105.39    6.30
   0  -9  -1  638.04   23.80
   0  -9  -1  701.43   26.10
   0  -9  -1  635.14   24.00
   0   9   1  680.93   24.30
   0   9   1  631.04   24.10
   0   9   1  675.63   22.80
  -1  -9  -1   40.20    4.60
  -1  -9  -1   33.00    4.50
   1   9   1   34.90    3.10
   1   9   1   39.90    4.20
   1   9   1   32.10    3.60
  -2  -9  -1 1307.87   47.00
  -2  -9  -1 1349.77   45.30
   2   9   1 1318.57   42.70
   2   9   1 1286.37   45.10
   2   9   1 1300.17   44.20
   2   9   1 1292.17   45.20
  -3  -9  -1   -0.10    1.70
  -3  -9  -1   -0.40    1.90
   3   9   1    1.60    2.00
   3   9   1    2.90    1.20
   3   9   1    1.20    1.80
   3   9   1    1.10    1.90
  -4  -9  -1   52.59    5.60
  -4  -9  -1   65.29    7.60
   4   9   1   48.50    6.20
   4   9   1   54.19    4.70
   4   9   1   47.90    4.90
   4   9   1   61.89    5.50
   4   9   1   52.39    3.60
  -5  -9  -1  816.02   32.10
  -5  -9  -1  797.12   29.40
   5   9   1  808.62   29.10
   5   9   1  786.72   29.00
   5   9   1  774.12   28.80
   5   9   1  752.72   27.40
  -6  -9  -1   47.60    5.30
   6   9   1   59.49    4.50
   6   9   1   44.60    5.10
   6   9   1   59.59    7.40
   6   9   1   46.90    5.10
   6   9   1   53.29    5.30
  -7  -9  -1   93.79    7.30
   7   9   1   90.19    6.10
   7   9   1  130.09   15.10
   7   9   1  105.09    7.20
   7   9   1   95.79    7.40
   7   9   1   96.79    6.70
   8   9   1  112.19    7.10
   8   9   1  103.89    8.20
   8   9   1  119.99    7.70
   8   9   1  109.79    7.30
   9   9   1   59.49    6.10
   9   9   1   75.29    7.80
   9   9   1   72.89    6.30
   9   9   1   65.59    6.20
  10   9   1   27.10    5.40
  10   9   1   37.00    5.00
  10   9   1   36.60    5.00
  10   9   1   29.70    4.50
  11   9   1   93.09    9.20
  11   9   1   95.39    7.30
  11   9   1   98.39    6.80
  11   9   1  105.79    8.00
  12   9   1   42.30    5.40
  12   9   1   32.50    6.50
  12   9   1   38.50    4.00
  12   9   1   34.30    5.50
  12   9   1   26.30    3.60
  13   9   1  104.59    9.70
  13   9   1   82.29    9.50
  14   9   1   62.49    8.60
  14   9   1   64.79    9.40
  15 -10  -1   10.20    4.50
  15 -10  -1    5.50    6.00
  14 -10  -1  698.03   29.60
  14 -10  -1  765.82   32.40
  13 -10  -1  101.89   10.60
  13 -10  -1   87.79    8.50
  12 -10  -1   37.10    6.50
  12 -10  -1   44.60    5.80
  11 -10  -1   27.40    4.50
  11 -10  -1   22.60    5.30
  10 -10  -1    0.70    1.90
  10 -10  -1   -4.90    2.70
  10 -10  -1    2.60    2.80
  10 -10  -1    2.50    2.30
  10 -10  -1   -0.10    1.90
   9 -10  -1   19.60    3.90
   9 -10  -1   18.60    4.30
   9 -10  -1   21.20    3.50
   9 -10  -1   15.90    3.10
   9 -10  -1   15.70    3.10
  -9  10   1   13.40    2.60
   8 -10  -1  512.95   20.30
   8 -10  -1  526.55   20.60
   8 -10  -1  518.45   21.50
   8 -10  -1  504.95   19.40
  -8  10   1  498.85   19.00
   7 -10  -1   61.09    4.40
   7 -10  -1   58.69    5.60
   7 -10  -1   63.39    5.60
   7 -10  -1   58.39    6.10
  -7  10   1   58.19    4.70
   6 -10  -1  240.18   11.00
   6 -10  -1  258.57   12.00
   6 -10  -1  233.38   11.60
   6 -10  -1  234.28    9.60
  -6  10   1  232.18   10.60
   5 -10  -1   57.69    5.70
   5 -10  -1   64.89    3.60
   5 -10  -1   62.69    5.30
   5 -10  -1   64.19    4.90
  -5  10   1   66.49    5.00
   4 -10  -1    2.00    1.90
   4 -10  -1    0.60    1.70
   4 -10  -1    1.50    1.70
   4 -10  -1    1.20    1.40
   4 -10  -1    3.60    1.00
   4 -10  -1    1.40    1.20
  -4  10   1    0.30    1.70
  -4  10   1    0.00    1.90
   3 -10  -1   58.89    5.70
   3 -10  -1   57.59    4.10
   3 -10  -1   62.79    4.30
   3 -10  -1   65.39    4.70
   3 -10  -1   57.79    4.20
  -3  10   1   70.49    5.20
  -3  10   1   53.59    4.80
   2 -10  -1    2.60    1.60
   2 -10  -1    1.10    1.30
   2 -10  -1   -0.20    1.70
   2 -10  -1    2.80    1.70
   2 -10  -1    1.10    1.60
  -2  10   1   -0.60    1.90
  -2  10   1    2.70    0.90
  -2  10   1    4.20    2.00
   1 -10  -1  244.98   11.00
   1 -10  -1  241.48    9.80
   1 -10  -1  234.28   10.60
   1 -10  -1  264.37   13.00
  -1  10   1  249.28    9.40
  -1  10   1  245.98   11.30
  -1  10   1  262.67   11.40
   0 -10  -1  153.98    7.80
   0 -10  -1  155.38    9.80
   0 -10  -1  165.58    8.40
   0  10   1  146.59    6.80
   0  10   1  153.68    8.30
   0  10   1  149.29    8.30
  -1 -10  -1    2.90    2.20
  -1 -10  -1    0.20    2.30
   1  10   1    3.20    1.60
   1  10   1    3.80    2.00
   1  10   1    3.00    2.00
  -2 -10  -1  286.17   12.80
  -2 -10  -1  240.28   13.70
   2  10   1  305.07   13.00
   2  10   1  283.37   11.70
   2  10   1  278.47   12.50
  -3 -10  -1    4.00    2.10
  -3 -10  -1    1.30    2.70
   3  10   1    3.20    1.30
   3  10   1    1.90    2.00
   3  10   1    8.20    2.50
   3  10   1    4.70    2.50
  -4 -10  -1  199.48   12.20
  -4 -10  -1  207.48   10.80
   4  10   1  193.68   10.50
   4  10   1  215.98    8.60
   4  10   1  207.08   10.40
   4  10   1  214.98   10.20
  -5 -10  -1  142.39    8.60
   5  10   1  123.79    6.30
   5  10   1  123.49    7.80
   5  10   1  116.29    7.60
   5  10   1  127.79    8.10
  -6 -10  -1    5.90    2.70
   6  10   1   12.10    3.40
   6  10   1    1.60    2.50
   6  10   1    5.90    2.10
   6  10   1    6.20    2.90
  -7 -10  -1  328.77   15.20
   7  10   1  315.07   14.60
   7  10   1  313.67   14.40
   7  10   1  317.97   15.10
   7  10   1  311.37   13.40
   8  10   1  303.17   13.90
   8  10   1  287.27   14.50
   8  10   1  260.07   13.20
   8  10   1  292.17   12.90
   9  10   1   10.10    3.20
   9  10   1   12.00    3.50
   9  10   1   10.40    3.90
   9  10   1    2.90    2.80
  10  10   1  380.46   17.00
  10  10   1  370.76   18.50
  10  10   1  373.26   16.80
  10  10   1  380.76   16.50
  11  10   1   55.79    5.90
  11  10   1   57.39    7.70
  11  10   1   60.99    6.40
  11  10   1   57.19    6.50
  12  10   1   66.49    8.70
  12  10   1   67.89    7.50
  12  10   1   77.19    7.40
  12  10   1   77.39    6.20
  13  10   1   -0.80    3.50
  13  10   1   -2.10    3.20
  13  10   1    0.10    4.80
  14  10   1  102.49   11.70
  14  10   1   91.69    9.60
  15 -11  -1   37.70    6.50
  15 -11  -1   50.39    9.30
  14 -11  -1    3.90    4.80
  14 -11  -1    1.60    3.40
  13 -11  -1  340.97   16.70
  13 -11  -1  344.67   18.90
  12 -11  -1    0.20    3.90
  12 -11  -1    0.20    2.90
  11 -11  -1  155.78    9.20
  11 -11  -1  137.79   10.90
  10 -11  -1   23.70    4.40
  10 -11  -1   22.60    3.70
  10 -11  -1   14.90    3.20
  10 -11  -1   21.50    3.90
  10 -11  -1   20.30    4.90
   9 -11  -1  224.68   11.40
   9 -11  -1  237.68   13.00
   9 -11  -1  212.78   11.70
   9 -11  -1  236.98   10.90
   9 -11  -1  242.58   11.60
  -9  11   1  233.98   10.50
   8 -11  -1   10.30    2.60
   8 -11  -1    7.50    3.50
   8 -11  -1   18.10    3.80
   8 -11  -1   10.40    3.20
  -8  11   1   11.40    2.70
   7 -11  -1  170.18    7.90
   7 -11  -1  169.28    9.30
   7 -11  -1  179.38    9.90
   7 -11  -1  158.38    9.70
  -7  11   1  161.28    8.50
   6 -11  -1   45.40    5.20
   6 -11  -1   46.30    4.70
   6 -11  -1   44.80    3.50
   6 -11  -1   48.50    5.80
  -6  11   1   48.10    4.80
   5 -11  -1   28.40    3.70
   5 -11  -1   24.60    4.10
   5 -11  -1   28.60    2.40
   5 -11  -1   23.80    3.80
  -5  11   1   24.30    3.60
   4 -11  -1   -0.80    1.60
   4 -11  -1    2.20    2.50
   4 -11  -1    0.20    1.20
   4 -11  -1   -1.00    1.90
   4 -11  -1   -0.30    1.30
  -4  11   1    0.40    1.90
   3 -11  -1  254.97   10.90
   3 -11  -1  264.77   11.40
   3 -11  -1  263.47   11.10
   3 -11  -1  263.97   11.10
   3 -11  -1  268.67   13.40
  -3  11   1  258.77   12.00
  -3  11   1  261.97   12.00
   2 -11  -1   31.70    4.70
   2 -11  -1   45.10    4.00
   2 -11  -1   32.40    3.60
   2 -11  -1   41.00    4.30
   2 -11  -1   41.40    3.70
  -2  11   1   42.70    2.50
  -2  11   1   47.00    5.00
  -2  11   1   42.30    4.70
   1 -11  -1  115.19    7.00
   1 -11  -1  117.29    5.70
   1 -11  -1  114.19    6.70
   1 -11  -1  117.69    8.70
  -1  11   1  117.19    5.30
  -1  11   1  118.59    7.20
  -1  11   1  107.19    7.30
   0 -11  -1    4.20    2.90
   0 -11  -1    6.30    2.10
   0 -11  -1    9.80    2.80
   0  11   1    6.40    2.70
   0  11   1    9.70    2.80
   0  11   1    9.10    1.90
  -1 -11  -1   14.30    3.50
  -1 -11  -1   23.90    4.20
   1  11   1   20.40    3.60
   1  11   1   24.60    3.00
   1  11   1   19.00    3.30
  -2 -11  -1    1.70    2.10
  -2 -11  -1    6.30    2.80
   2  11   1    2.40    1.80
   2  11   1    6.40    2.70
   2  11   1    5.10    2.50
  -3 -11  -1  274.97   14.60
  -3 -11  -1  245.08   12.50
   3  11   1  252.77   12.60
   3  11   1  251.17   12.20
   3  11   1  278.97   11.80
  -4 -11  -1  284.77   14.10
   4  11   1  298.37   13.90
   4  11   1  321.07   14.40
   4  11   1  301.07   11.50
   4  11   1  298.17   13.40
  -5 -11  -1   53.59    6.30
   5  11   1   63.69    4.50
   5  11   1   64.79    6.20
   5  11   1   70.49    6.50
   5  11   1   70.79    6.40
  -6 -11  -1   19.40    3.70
   6  11   1   35.70    3.80
   6  11   1   38.30    5.10
   6  11   1   42.10    5.30
   6  11   1   31.90    4.90
  -7 -11  -1  442.16   19.60
   7  11   1  459.45   19.10
   7  11   1  426.56   19.10
   7  11   1  438.46   17.30
   7  11   1  436.96   18.90
   8  11   1   15.70    4.20
   8  11   1   17.70    3.50
   8  11   1   21.10    4.10
   8  11   1   15.10    3.70
   9  11   1  109.09    9.00
   9  11   1  104.89    7.30
   9  11   1  106.49    8.20
   9  11   1  114.49    8.20
  10  11   1    6.30    4.00
  10  11   1   -0.30    2.90
  10  11   1   -1.40    2.70
  10  11   1   -0.50    2.40
  11  11   1   25.70    4.90
  11  11   1   17.20    4.10
  11  11   1   23.10    4.30
  11  11   1   27.40    6.00
  12  11   1   10.30    4.10
  12  11   1    5.90    4.80
  12  11   1   12.80    4.00
  12  11   1    9.40    3.30
  13  11   1    7.80    5.80
  13  11   1   17.00    5.10
  13  11   1   16.10    4.40
  14 -12  -1   77.59   10.20
  13 -12  -1    3.60    5.00
  12 -12  -1  257.47   15.50
  11 -12  -1   19.10    5.20
  11 -12  -1   28.00    6.80
  11 -12  -1   24.10    3.70
  10 -12  -1  300.47   14.10
  10 -12  -1  307.57   15.00
  10 -12  -1  302.07   16.00
  10 -12  -1  308.87   14.00
   9 -12  -1   36.30    5.20
   9 -12  -1   41.40    5.40
   9 -12  -1   33.30    5.40
  -9  12   1   34.10    4.30
   8 -12  -1  100.59    7.80
   8 -12  -1   93.89    8.20
   8 -12  -1  103.39    7.60
  -8  12   1  106.39    6.70
   7 -12  -1  146.39    9.40
   7 -12  -1  132.09    9.10
   7 -12  -1  137.79    8.50
  -7  12   1  150.38    8.20
   6 -12  -1  136.99    9.50
   6 -12  -1  155.88    8.50
   6 -12  -1  140.19    9.00
  -6  12   1  154.08    8.50
   5 -12  -1   46.80    4.80
   5 -12  -1   45.00    5.70
   5 -12  -1   52.39    5.50
  -5  12   1   46.60    5.00
   4 -12  -1  119.19    7.20
   4 -12  -1  119.99    6.00
   4 -12  -1  125.89    9.00
   4 -12  -1  120.29    6.80
   4 -12  -1   98.79    6.00
  -4  12   1  114.29    7.60
   3 -12  -1   83.29    7.80
   3 -12  -1   80.89    5.70
   3 -12  -1   82.99    5.70
   3 -12  -1   92.49    5.80
   3 -12  -1   82.79    5.50
  -3  12   1  102.79    6.90
   2 -12  -1  465.35   17.80
   2 -12  -1  439.36   18.10
   2 -12  -1  486.05   21.30
   2 -12  -1  462.65   17.80
   2 -12  -1  464.95   18.50
  -2  12   1  463.15   20.50
  -2  12   1  459.05   19.20
  -2  12   1  537.05   17.40
   1 -12  -1   63.09    5.60
   1 -12  -1   70.99    7.30
   1 -12  -1   58.69    4.10
  -1  12   1   64.09    3.90
  -1  12   1   72.39    6.80
  -1  12   1   66.79    6.20
   0 -12  -1    8.10    2.90
   0 -12  -1    2.70    3.10
   0  12   1    7.50    1.90
   0  12   1    9.20    3.10
   0  12   1    6.80    3.00
  -1 -12  -1   12.50    3.00
  -1 -12  -1   14.10    3.90
   1  12   1   15.30    3.30
   1  12   1   21.80    4.10
   1  12   1   22.50    3.00
  -2 -12  -1   10.90    4.20
  -2 -12  -1   12.50    3.30
   2  12   1   10.40    3.10
   2  12   1   15.90    3.50
   2  12   1   12.40    2.70
  -3 -12  -1  347.47   15.20
   3  12   1  300.57   13.40
   3  12   1  308.27   14.80
   3  12   1  313.17   14.70
  -4 -12  -1  724.83   28.50
   4  12   1  731.93   28.30
   4  12   1  753.22   27.50
   4  12   1  728.33   28.40
  -5 -12  -1   57.89    7.10
   5  12   1   49.40    4.00
   5  12   1   49.70    5.90
   5  12   1   56.29    5.80
   5  12   1   44.60    5.60
  -6 -12  -1  290.67   14.60
   6  12   1  291.67   14.20
   6  12   1  278.57   13.80
   6  12   1  291.47   14.30
   6  12   1  280.07   11.90
  -7 -12  -1   22.90    5.20
   7  12   1   13.70    3.90
   7  12   1   20.00    4.40
   7  12   1   21.60    3.30
   7  12   1   18.90    4.20
   8  12   1    4.20    3.60
   8  12   1   -2.10    2.60
   8  12   1    5.30    3.30
   8  12   1    4.30    2.40
   9  12   1    1.30    2.40
   9  12   1   -0.90    2.80
   9  12   1   -3.70    3.00
   9  12   1    0.00    2.80
  10  12   1   28.30    4.60
  10  12   1   26.30    4.90
  10  12   1   31.40    6.10
  10  12   1   28.20    5.10
  11  12   1   -0.20    3.80
  11  12   1    4.90    3.40
  11  12   1   -2.50    2.80
  11  12   1    1.10    3.00
  12  12   1  260.17   13.30
  12  12   1  258.97   16.60
  12  12   1  276.07   14.70
  12  12   1  272.27   14.30
  13 -13  -1  151.58   13.50
  12 -13  -1   48.00    7.80
  11 -13  -1   21.10    5.40
  11 -13  -1   21.90    4.00
  11 -13  -1   21.10    4.00
  10 -13  -1   68.39    8.00
  10 -13  -1   76.19    7.50
  10 -13  -1   64.99    6.60
  10 -13  -1   64.29    6.40
   9 -13  -1   83.49    7.50
   9 -13  -1   79.49    7.20
   9 -13  -1   71.29    7.90
  -9  13   1   82.59    6.50
   8 -13  -1    0.60    2.80
   8 -13  -1    2.60    2.90
   8 -13  -1    1.50    2.60
  -8  13   1    2.70    2.70
   7 -13  -1  343.07   15.90
   7 -13  -1  338.37   14.90
   7 -13  -1  311.37   15.90
  -7  13   1  323.77   14.60
   6 -13  -1   61.39    7.40
   6 -13  -1   52.29    5.40
   6 -13  -1   45.20    5.50
  -6  13   1   50.29    5.50
   5 -13  -1  209.78   10.90
   5 -13  -1  211.48   10.20
   5 -13  -1  206.78   12.30
  -5  13   1  192.78   10.80
   4 -13  -1   36.00    3.90
   4 -13  -1   40.30    4.60
   4 -13  -1   43.90    4.50
   4 -13  -1   41.10    3.80
   4 -13  -1   50.09    7.00
  -4  13   1   36.20    4.90
   3 -13  -1  408.26   16.50
   3 -13  -1  439.86   20.10
   3 -13  -1  408.26   16.80
   3 -13  -1  435.86   16.90
   3 -13  -1  424.16   16.70
  -3  13   1  429.76   18.00
   2 -13  -1   40.30    6.40
   2 -13  -1   36.90    4.60
   2 -13  -1   46.20    4.30
   2 -13  -1   46.00    4.40
  -2  13   1   38.80    5.10
   1 -13  -1  120.89    9.90
   1 -13  -1  124.49    6.90
   1 -13  -1  119.19    7.90
  -1  13   1  125.99    8.40
   0 -13  -1  603.44   24.10
   0 -13  -1  581.14   26.30
   0  13   1  616.04   21.80
   0  13   1  610.64   24.50
   0  13   1  656.63   24.70
  -1 -13  -1   86.29    9.00
  -1 -13  -1   95.49    7.40
   1  13   1   83.89    7.40
   1  13   1   91.29    5.60
   1  13   1   88.39    7.40
  -2 -13  -1   -1.30    2.20
   2  13   1   -0.90    2.20
   2  13   1    0.10    1.90
   2  13   1   -2.80    2.40
  -3 -13  -1  156.38   10.20
   3  13   1  174.38   10.50
   3  13   1  177.88    9.10
   3  13   1  171.58   10.30
  -4 -13  -1   51.49    6.80
   4  13   1   52.79    5.50
   4  13   1   47.20    6.00
   4  13   1   43.90    6.00
  -5 -13  -1  250.47   13.20
   5  13   1  225.18   12.50
   5  13   1  227.28   11.70
   5  13   1  207.48   12.30
  -6 -13  -1   24.80    4.60
   6  13   1   27.10    4.90
   6  13   1   15.20    4.30
   6  13   1   20.30    4.30
   7  13   1  135.09    9.30
   7  13   1  120.19    9.30
   7  13   1  135.19    9.50
   8  13   1   87.79    8.30
   8  13   1   86.59    8.50
   8  13   1   88.39    8.60
   9  13   1  304.07   16.40
   9  13   1  319.07   16.10
   9  13   1  335.97   16.30
  10  13   1   86.09    9.60
  10  13   1   82.69    8.20
  10  13   1   82.09    8.70
  11  13   1   23.00    6.20
  11  13   1   27.80    5.90
  11  13   1   30.50    5.60
  12  13   1  172.88   13.80
  12  13   1  170.48   12.10
  12  13   1  175.28   11.20
  12 -14  -1  155.38   12.60
  11 -14  -1    4.90    3.10
  11 -14  -1    5.70    3.10
  11 -14  -1   10.60    4.90
  10 -14  -1  132.39    9.20
  10 -14  -1  133.89   10.50
  10 -14  -1  123.79    9.00
   9 -14  -1    7.60    4.00
   9 -14  -1    9.60    3.60
   9 -14  -1    6.80    3.40
  -9  14   1    9.70    3.30
   8 -14  -1    2.50    2.90
   8 -14  -1   -4.10    2.50
   8 -14  -1    1.60    2.70
  -8  14   1    1.40    2.70
   7 -14  -1    5.80    3.50
   7 -14  -1   13.00    3.50
   7 -14  -1   16.60    4.20
  -7  14   1   13.30    3.60
   6 -14  -1   11.10    3.40
   6 -14  -1   14.30    4.20
   6 -14  -1   14.60    3.90
  -6  14   1   19.60    4.10
   5 -14  -1  135.19    8.70
   5 -14  -1  137.59   10.50
   5 -14  -1  146.89    8.40
  -5  14   1  151.08    9.20
   4 -14  -1  279.97   12.20
   4 -14  -1  278.87   11.80
   4 -14  -1  288.77   13.10
   4 -14  -1  288.07   15.80
   4 -14  -1  279.17   12.60
  -4  14   1  304.27   14.20
   3 -14  -1    4.70    2.50
   3 -14  -1    2.90    2.40
   3 -14  -1    2.00    2.20
   3 -14  -1    2.00    3.00
  -3  14   1    4.80    3.10
   2 -14  -1  271.27   11.70
   2 -14  -1  268.37   15.30
   2 -14  -1  258.17   12.30
   2 -14  -1  239.78   11.10
  -2  14   1  262.17   13.30
   1 -14  -1   -0.50    1.90
   1 -14  -1   -0.90    2.30
   1 -14  -1   -1.40    3.00
  -1  14   1    1.30    2.80
   0 -14  -1   41.00    7.10
   0 -14  -1   38.20    5.40
   0  14   1   40.20    5.50
  -1 -14  -1   69.39    7.50
   1  14   1   66.99    7.30
   1  14   1   68.19    7.10
   1  14   1   63.39    4.90
  -2 -14  -1   39.90    5.50
   2  14   1   46.90    6.00
   2  14   1   48.60    6.40
   2  14   1   51.49    4.90
  -3 -14  -1  128.79    9.60
   3  14   1  141.09    8.00
   3  14   1  131.19    9.40
   3  14   1  124.59    9.40
  -4 -14  -1  770.42   30.40
   4  14   1  766.42   30.20
   4  14   1  751.72   30.20
   4  14   1  760.02   28.70
  -5 -14  -1   13.80    4.40
   5  14   1   12.20    4.10
   5  14   1    6.30    3.40
   5  14   1   12.40    3.60
  -6 -14  -1  144.19   10.70
   6  14   1  141.09   10.20
   6  14   1  138.39    9.20
   6  14   1  141.99   10.10
   7  14   1   -5.00    3.00
   7  14   1   -2.60    3.20
   7  14   1   -3.30    2.80
   8  14   1   -3.00    3.30
   8  14   1   -2.80    3.20
   8  14   1    6.70    4.00
   9  14   1   -2.80    3.80
   9  14   1    3.00    4.00
   9  14   1    4.90    4.00
  10  14   1   69.89    8.30
  10  14   1   62.69    8.60
  10  14   1   65.79    7.80
  11  14   1   27.40    7.00
  11  14   1   15.10    5.70
  11  14   1   29.60    6.00
  11 -15  -1   -3.10    2.90
  11 -15  -1    3.90    3.10
  11 -15  -1   -1.60    4.10
  10 -15  -1   30.90    5.50
  10 -15  -1   26.40    5.20
  10 -15  -1   26.30    6.00
   9 -15  -1   -0.50    3.00
   9 -15  -1   -6.00    3.30
   9 -15  -1    3.40    3.40
  -9  15   1   -3.40    3.20
   8 -15  -1   45.50    5.70
   8 -15  -1   41.00    6.20
   8 -15  -1   46.70    6.80
  -8  15   1   37.80    5.40
   7 -15  -1  164.78   10.50
   7 -15  -1  161.68    9.70
   7 -15  -1  170.08   11.60
  -7  15   1  163.78   10.00
   6 -15  -1   -2.90    2.30
   6 -15  -1   -2.30    2.60
   6 -15  -1   -2.70    2.80
  -6  15   1   -3.20    2.50
   5 -15  -1   47.80    6.80
   5 -15  -1   69.89    6.50
   5 -15  -1   59.89    5.80
  -5  15   1   44.50    5.90
   4 -15  -1  349.37   14.40
   4 -15  -1  366.16   15.10
   4 -15  -1  328.07   14.00
   4 -15  -1  327.47   15.00
   4 -15  -1  361.26   18.50
  -4  15   1  370.66   16.70
   3 -15  -1  103.59    7.20
   3 -15  -1  110.09   10.00
   3 -15  -1   99.39    6.90
  -3  15   1  116.49    8.80
   2 -15  -1   36.10    6.50
   2 -15  -1   36.60    5.20
   2 -15  -1   27.30    4.00
  -2  15   1   34.20    5.20
   1 -15  -1  626.74   24.50
   1 -15  -1  597.14   23.00
   1 -15  -1  601.44   27.60
  -1  15   1  637.54   25.30
   0 -15  -1   23.30    4.80
   0  15   1   19.70    4.60
  -1 -15  -1   58.69    6.50
   1  15   1   54.49    6.70
  -2 -15  -1   -1.00    3.00
   2  15   1   -3.10    3.30
   2  15   1   -1.50    3.00
   2  15   1    0.20    2.90
  -3 -15  -1  179.68   11.80
   3  15   1  180.98   11.30
   3  15   1  197.98   11.90
   3  15   1  187.48    9.90
  -4 -15  -1   53.09    6.70
   4  15   1   57.59    6.90
   4  15   1   56.69    7.10
   4  15   1   70.69    6.60
  -5 -15  -1  222.48   13.60
   5  15   1  205.18   13.00
   5  15   1  228.28   11.90
   5  15   1  217.88   12.90
  -6 -15  -1   -3.30    2.90
   6  15   1   -2.70    2.80
   6  15   1    0.80    3.70
   6  15   1    0.20    2.80
   7  15   1  183.78   11.70
   7  15   1  192.18   12.50
   7  15   1  178.18   12.00
   8  15   1  284.17   15.80
   8  15   1  294.47   16.10
   8  15   1  283.17   15.40
   9  15   1  134.49   11.10
   9  15   1  144.69   11.60
   9  15   1  147.39   11.80
  10  15   1    2.90    4.70
  10  15   1   -2.00    4.50
  10 -16  -1   42.80    6.80
  10 -16  -1   44.40    7.30
   9 -16  -1    6.40    4.20
   9 -16  -1   12.20    4.40
   8 -16  -1   -3.60    2.80
   8 -16  -1    9.10    3.90
  -8  16   1   -1.50    3.10
   7 -16  -1   86.89    9.10
   7 -16  -1   80.79    8.10
  -7  16   1   95.59    7.90
   6 -16  -1   -3.40    2.60
   6 -16  -1    0.50    3.50
  -6  16   1    3.30    3.30
   5 -16  -1   30.10    6.80
   5 -16  -1   11.40    4.00
  -5  16   1   19.00    4.60
   4 -16  -1  282.47   16.70
   4 -16  -1  284.97   12.60
  -4  16   1  298.17   15.00
   3 -16  -1    2.70    4.00
   3 -16  -1    4.30    2.60
  -3  16   1   -0.20    3.30
   2 -16  -1   44.00    5.40
   2 -16  -1   34.30    6.10
  -2  16   1   45.20    6.30
   1 -16  -1    5.60    3.10
  -1  16   1    1.20    3.40
   0 -16  -1   10.40    3.80
   0  16   1   15.60    4.30
  -1 -16  -1    2.30    2.90
   1  16   1    3.60    3.80
  -2 -16  -1  102.89    9.20
   2  16   1   91.99    8.80
  -3 -16  -1    4.30    3.50
   3  16   1   -0.20    3.60
   3  16   1    0.70    3.50
  -4 -16  -1  420.06   20.70
   4  16   1  430.46   19.10
   4  16   1  444.86   20.60
   4  16   1  453.95   21.00
  -5 -16  -1   45.90    6.80
   5  16   1   50.69    7.20
   5  16   1   53.19    6.30
   5  16   1   50.29    7.10
  -6 -16  -1    1.40    4.40
   6  16   1   -0.50    3.00
   6  16   1    1.20    4.20
   6  16   1    6.50    4.30
   7  16   1   24.70    6.10
   7  16   1   31.30    6.30
   7  16   1   26.30    5.30
   8  16   1    5.00    4.60
   8  16   1    1.20    4.30
   8  16   1    6.40    5.20
   9 -17  -1   19.30    5.80
   9 -17  -1   26.90    6.10
   8 -17  -1   34.00    6.00
   8 -17  -1   48.70    7.90
  -8  17   1   34.50    6.00
   7 -17  -1   46.80    7.40
   7 -17  -1   44.40    9.00
  -7  17   1   35.10    6.00
   6 -17  -1    7.50    4.50
  -6  17   1   -2.70    3.10
   5 -17  -1   -1.60    3.50
  -5  17   1   -5.40    3.20
   4 -17  -1    6.60    2.60
   4 -17  -1   10.30    4.80
  -4  17   1    7.10    4.20
   3 -17  -1  367.46   20.10
   3 -17  -1  367.16   16.00
  -3  17   1  359.96   17.90
   2 -17  -1    6.60    3.30
  -2  17   1   10.80    4.50
   1 -17  -1    7.70    3.50
  -1  17   1    1.50    3.80
   0 -17  -1   20.90    4.50
   0  17   1   20.80    5.60
  -1 -17  -1   49.00    6.90
   1  17   1   54.89    7.50
  -2 -17  -1   18.50    5.20
   2  17   1   16.70    5.10
  -3 -17  -1   48.60    6.90
   3  17   1   66.69   10.70
   3  17   1   56.39    7.40
  -4 -17  -1    9.00    4.50
   4  17   1   10.70    4.80
   4  17   1    6.90    4.60
  -5 -17  -1   29.30    5.80
   5  17   1   52.19    7.50
   5  17   1   48.40    7.20
  -6 -17  -1    0.50    4.10
   6  17   1    5.30    4.90
   6  17   1   -1.20    3.90
   6  17   1    4.50    5.90
   7  17   1   57.39    7.30
   7  17   1   53.19    8.10
   7  17   1   50.89    8.30
   7 -18  -1   65.49    9.70
  -7  18   1   53.49    7.30
   6 -18  -1   47.20    8.80
  -6  18   1   67.89    7.90
   5 -18  -1    4.20    4.30
  -5  18   1    9.50    4.80
   4 -18  -1    7.80    3.10
   4 -18  -1    2.10    4.20
  -4  18   1    9.40    4.70
   3 -18  -1   50.79    5.80
  -3  18   1   53.99    7.70
   2 -18  -1  172.88   10.70
  -2  18   1  166.28   12.50
   1 -18  -1    2.90    3.50
  -1  18   1    0.20    4.30
   0 -18  -1  122.59    9.80
   0  18   1  112.79   10.70
  -1 -18  -1   -4.90    3.30
   1  18   1   -6.70    3.80
  -2 -18  -1   62.99    7.70
   2  18   1   76.49    9.00
  -3 -18  -1   -1.60    4.40
   3  18   1   -2.10    4.40
  -4 -18  -1   72.49    8.90
   4  18   1   75.49    9.40
   4  18   1   78.19    9.10
  -5 -18  -1   38.40    7.00
   5  18   1   21.70    6.40
   5  18   1   35.20    7.50
  -4  19   1  121.19   11.10
   3 -19  -1   77.59    7.50
  -3  19   1   96.79   10.20
   2 -19  -1   36.10    5.90
  -2  19   1   37.30    7.20
   1 -19  -1   50.59    7.20
  -1  19   1   49.90    8.20
   0 -19  -1    3.70    4.40
   0  19   1   -1.10    5.70
  -1 -19  -1   35.30    6.40
   1  19   1   42.90    8.00
  -2 -19  -1    6.20    5.10
   2  19  -2    2.10    5.50
  -2 -19   2    3.30    4.20
   1  19  -2   -4.60    4.60
  -1 -19   2   -1.50    4.40
   0  19  -2    4.70    5.60
   0 -19   2    6.80    4.70
  -1  19  -2   33.30    7.30
   1 -19   2   30.40    6.00
  -2  19  -2   -7.00    4.50
   2 -19   2    1.40    4.00
  -3  19  -2   15.00    5.90
   3 -19   2    9.40    4.40
   5  18  -2   44.00    7.90
   5  18  -2   31.90    6.70
  -5 -18   2   31.60    6.60
   4  18  -2   28.70    6.80
   4  18  -2   39.50    6.60
  -4 -18   2   41.00    6.60
   3  18  -2    6.10    4.90
   3  18  -2   16.40    5.80
  -3 -18   2    0.40    3.60
   2  18  -2   25.20    6.50
  -2 -18   2   20.90    5.80
   1  18  -2   -1.50    4.20
  -1 -18   2   -0.70    3.30
   0  18  -2   38.80    7.00
   0 -18   2   49.60    7.30
  -1  18  -2    9.70    5.00
   1 -18   2   -0.10    3.40
  -2  18  -2   -6.20    4.10
   2 -18   2    0.90    3.40
  -3  18  -2   16.90    5.30
   3 -18   2   16.40    4.60
  -4  18  -2  199.28   13.40
   4 -18   2  202.78   11.10
  -5  18  -2   35.70    6.40
   5 -18   2   28.30    6.60
  -6  18  -2   -1.10    4.20
   6 -18   2   12.00    5.50
   7  17  -2   68.89    8.60
   7  17  -2   54.09    8.60
   6  17  -2   -2.20    4.10
   6  17  -2   -0.80    4.20
   5  17  -2  133.99   11.00
   5  17  -2  118.99   11.30
  -5 -17   2  124.39   11.40
   4  17  -2   26.90    5.70
   4  17  -2   32.30    6.70
  -4 -17   2   26.80    5.40
   3  17  -2   20.20    5.30
   3  17  -2   22.60    5.70
  -3 -17   2   18.10    4.60
   2  17  -2   14.50    7.80
   2  17  -2    6.50    4.50
  -2 -17   2    7.40    3.70
   1  17  -2    0.40    3.80
  -1 -17   2    4.20    3.50
   0  17  -2   46.80    7.00
   0 -17   2   57.29    7.50
  -1  17  -2   57.99    7.40
   1 -17   2   67.59    7.30
  -2  17  -2    7.80    4.50
   2 -17   2   17.90    4.30
  -3  17  -2   -3.60    3.40
   3 -17   2    0.10    2.90
  -4  17  -2   10.00    4.20
   4 -17   2   23.30    6.40
   4 -17   2   14.20    3.60
  -5  17  -2  125.69   10.00
   5 -17   2  130.59    7.80
   5 -17   2  120.49   11.90
  -6  17  -2    0.20    3.60
   6 -17   2    1.20    3.90
  -7  17  -2   27.50    5.50
   7 -17   2   29.00    6.90
  -8  17  -2   61.49    7.40
   8 -17   2   69.09    8.20
   8 -17   2   76.99   10.30
   9  16  -2   22.80    5.70
   9  16  -2   23.50    6.40
   9  16  -2   26.30    6.10
   8  16  -2   43.10    7.30
   8  16  -2   39.90    6.20
   8  16  -2   42.10    6.70
   7  16  -2   25.00    5.50
   7  16  -2   30.90    6.40
   7  16  -2   25.20    5.20
   6  16  -2   69.19    8.50
   6  16  -2   71.19    7.10
   6  16  -2   60.69    8.10
  -6 -16   2   54.89    8.70
   5  16  -2    4.70    3.70
   5  16  -2    2.90    3.70
   5  16  -2    2.70    4.90
  -5 -16   2    5.70    4.20
   4  16  -2  611.44   26.20
   4  16  -2  604.04   26.30
  -4 -16   2  616.04   26.50
   3  16  -2    0.50    3.80
   3  16  -2    4.60    3.60
  -3 -16   2   -2.00    3.30
   2  16  -2   45.30    6.80
   2  16  -2   42.50    6.20
  -2 -16   2   62.99    8.10
   1  16  -2   13.40    4.80
  -1 -16   2   14.50    4.40
   0  16  -2   37.70    6.30
   0 -16   2   37.10    5.40
  -1  16  -2  114.69    9.20
   1 -16   2  109.09    8.50
  -2  16  -2  198.18   11.90
   2 -16   2  182.58   10.70
  -3  16  -2   14.20    4.40
   3 -16   2    5.90    3.80
   3 -16   2   17.70    3.90
  -4  16  -2   -4.10    3.00
   4 -16   2    5.60    4.20
   4 -16   2    2.90    2.40
  -5  16  -2   18.50    4.60
   5 -16   2   12.00    2.90
   5 -16   2   11.30    4.40
   5 -16   2   10.70    5.20
  -6  16  -2   53.39    6.90
   6 -16   2   64.19    7.00
   6 -16   2   74.89    9.70
  -7  16  -2    0.70    3.30
   7 -16   2    1.20    3.40
   7 -16   2   -1.80    3.00
  -8  16  -2   -3.10    3.10
   8 -16   2   -5.60    3.00
   8 -16   2    4.60    3.80
   9 -16   2   -2.30    3.70
   9 -16   2   -3.60    3.50
  10 -16   2   34.40    6.90
  10 -16   2   29.60    7.00
  10 -16   2   40.10    7.00
  10  15  -2   16.20    5.60
  10  15  -2   12.70    5.30
  10  15  -2   16.60    5.30
   9  15  -2   11.40    4.50
   9  15  -2    5.90    4.50
   9  15  -2    0.50    4.20
   8  15  -2    4.30    4.20
   8  15  -2    6.90    4.10
   8  15  -2   12.60    4.50
   7  15  -2  181.68   10.90
   7  15  -2  165.68   11.50
   7  15  -2  175.08   11.90
   6  15  -2   35.20    5.90
   6  15  -2   32.10    5.00
   6  15  -2   34.00    6.00
  -6 -15   2   34.40    6.20
   5  15  -2  386.96   18.20
   5  15  -2  376.26   18.00
   5  15  -2  347.87   16.20
  -5 -15   2  361.46   18.10
   4  15  -2   26.20    5.10
   4  15  -2   29.40    4.40
   4  15  -2   23.30    5.30
  -4 -15   2   22.40    4.70
   3  15  -2  141.29   10.20
   3  15  -2  122.69    9.70
  -3 -15   2  132.39   10.10
   2  15  -2   19.30    5.00
   2  15  -2   21.90    4.60
  -2 -15   2   17.40    4.20
   1  15  -2  156.88   11.10
   1  15  -2  161.08   10.80
  -1 -15   2  186.68   10.80
   0  15  -2   15.50    4.40
   0 -15   2   13.70    3.80
  -1  15  -2  215.18   12.10
   1 -15   2  187.48   10.90
  -2  15  -2  137.59    9.60
   2 -15   2  131.79   11.00
   2 -15   2  116.79    8.30
  -3  15  -2  290.07   14.90
   3 -15   2  296.17   13.90
   3 -15   2  313.57   17.20
  -4  15  -2   41.20    5.80
   4 -15   2   58.59    5.70
   4 -15   2   51.79    5.40
   4 -15   2   41.80    7.30
  -5  15  -2   59.59    6.70
   5 -15   2   49.10    4.90
   5 -15   2   50.29    7.80
   5 -15   2   53.99    6.10
  -6  15  -2  142.59    9.40
   6 -15   2  144.19   11.30
   6 -15   2  122.99    9.00
  -7  15  -2  303.37   15.20
   7 -15   2  334.87   17.70
   7 -15   2  326.27   16.10
  -8  15  -2   45.30    5.70
   8 -15   2   43.20    6.70
   8 -15   2   37.60    6.20
   9 -15   2    2.70    3.70
   9 -15   2   -1.10    3.50
   9 -15   2   -3.80    3.20
  10 -15   2   30.60    6.20
  10 -15   2   30.20    6.10
  10 -15   2   41.30    7.20
  11 -15   2   31.60    6.10
  11 -15   2   27.00    6.90
  11 -15   2   27.90    6.30
  11  14  -2   28.30    6.50
  11  14  -2   48.10    7.30
  11  14  -2   37.40    6.10
  10  14  -2   98.39    9.70
  10  14  -2  129.69   10.00
  10  14  -2  123.99   10.40
   9  14  -2    0.40    3.30
   9  14  -2   -7.10    3.10
   9  14  -2    0.40    3.70
   8  14  -2   16.80    4.60
   8  14  -2    5.60    3.80
   8  14  -2    8.00    4.20
   7  14  -2   29.90    5.20
   7  14  -2   31.10    5.10
   7  14  -2   20.70    4.60
   6  14  -2   45.10    6.30
   6  14  -2   35.60    5.30
   6  14  -2   28.80    5.40
  -6 -14   2   38.70    6.50
   5  14  -2    1.90    2.80
   5  14  -2    5.60    3.60
   5  14  -2    5.30    3.70
  -5 -14   2    5.80    3.00
   4  14  -2   90.79    6.70
   4  14  -2   94.89    8.80
   4  14  -2   96.19    8.40
   3  14  -2    2.00    3.20
   3  14  -2    5.00    3.40
   3  14  -2    2.50    2.20
  -3 -14   2    3.90    2.80
   2  14  -2   74.99    7.50
   2  14  -2   87.09    8.10
   2  14  -2   86.59    5.60
  -2 -14   2   83.59    7.60
   1  14  -2    8.40    3.60
   1  14  -2    4.30    3.30
  -1 -14   2    8.00    3.00
   0  14  -2  893.71   33.60
   0  14  -2  888.11   33.70
   0 -14   2  857.91   32.90
  -1  14  -2    6.90    3.60
   1 -14   2    6.50    3.50
   1 -14   2   14.50    3.30
  -2  14  -2  359.36   17.00
   2 -14   2  409.96   19.60
   2 -14   2  372.56   16.30
   2 -14   2  365.36   14.90
  -3  14  -2   71.99    7.20
   3 -14   2   77.79    5.70
   3 -14   2   80.79    6.30
   3 -14   2   59.99    7.50
  -4  14  -2  140.49    9.60
   4 -14   2  145.49   11.10
   4 -14   2  150.38    8.40
   4 -14   2  151.48    8.70
  -5  14  -2   24.00    4.60
   5 -14   2   18.60    4.00
   5 -14   2   20.50    4.90
   5 -14   2   22.30    3.20
   5 -14   2   25.30    3.50
  -6  14  -2   61.09    6.50
   6 -14   2   63.49    6.80
   6 -14   2   76.09    9.20
  -7  14  -2   33.00    4.80
   7 -14   2   29.90    6.00
   7 -14   2   34.40    5.60
   8 -14   2  135.09   10.60
   8 -14   2  137.09   10.30
   9 -14   2   25.50    5.40
   9 -14   2   34.70    6.00
   9 -14   2   21.70    4.90
  10 -14   2   70.29    8.30
  10 -14   2   65.29    8.00
  10 -14   2   66.49    8.50
  11 -14   2    0.70    3.40
  11 -14   2   -0.50    3.40
  11 -14   2    1.60    4.70
  12 -14   2   48.40    8.90
  12 -14   2   53.79    6.90
  12 -14   2   51.59    7.00
  12  13  -2   -1.20    3.20
  12  13  -2   -6.50    4.00
  12  13  -2   -3.20    3.40
  12  13  -2    1.00    3.80
  11  13  -2   -3.20    2.90
  11  13  -2    5.60    4.60
  11  13  -2    3.40    3.50
  11  13  -2    2.40    3.30
  10  13  -2   32.40    5.20
  10  13  -2   32.20    5.00
  10  13  -2   33.60    5.60
  10  13  -2   27.10    5.80
   9  13  -2    1.30    2.80
   9  13  -2    2.00    3.00
   9  13  -2    0.60    3.50
   9  13  -2   -7.20    2.60
   8  13  -2   -3.90    2.80
   8  13  -2    0.60    3.20
   8  13  -2    1.40    2.40
   8  13  -2   -0.30    3.10
   7  13  -2    8.10    3.50
   7  13  -2    0.80    3.10
   7  13  -2    6.70    3.60
   6  13  -2    1.40    3.00
   6  13  -2   -2.50    2.50
   6  13  -2    0.00    2.90
  -6 -13   2   -0.30    2.50
   5  13  -2   20.20    3.80
   5  13  -2   14.90    4.00
   5  13  -2   12.10    4.30
  -5 -13   2   12.10    4.30
   4  13  -2    0.50    2.20
   4  13  -2   -1.60    2.70
   4  13  -2   -4.30    2.20
  -4 -13   2   -3.60    2.00
   3  13  -2   42.70    5.80
   3  13  -2   59.79    6.50
   3  13  -2   61.49    5.00
  -3 -13   2   44.50    5.90
   2  13  -2  104.39    6.20
   2  13  -2  102.59    8.10
   2  13  -2  104.19    8.10
  -2 -13   2  115.29    8.40
   1  13  -2    2.80    3.40
   1  13  -2    6.60    2.10
   1  13  -2    9.80    3.70
  -1 -13   2    4.80    2.60
  -1 -13   2    9.70    4.30
   0  13  -2   21.00    4.50
   0  13  -2   40.20    5.60
   0 -13   2   26.00    4.50
   0 -13   2   23.50    5.50
  -1  13  -2  816.42   30.80
  -1  13  -2  831.92   30.70
   1 -13   2  808.92   30.10
   1 -13   2  768.92   32.60
   1 -13   2  791.22   28.00
  -2  13  -2   20.00    4.40
   2 -13   2   39.20    4.00
   2 -13   2   38.60    6.60
   2 -13   2   27.10    4.00
  -3  13  -2    4.70    3.20
   3 -13   2    6.50    3.50
   3 -13   2    7.60    2.60
   3 -13   2   14.80    3.00
   3 -13   2    6.60    3.20
  -4  13  -2   -1.20    2.50
   4 -13   2    4.40    3.00
   4 -13   2   -0.50    2.10
   4 -13   2   -2.70    1.70
   4 -13   2    0.60    2.00
   4 -13   2    1.00    1.70
  -5  13  -2  369.36   15.90
   5 -13   2  334.47   13.90
   5 -13   2  334.77   15.40
   5 -13   2  344.37   13.70
   5 -13   2  354.16   17.60
  -6  13  -2   14.20    3.80
   6 -13   2   18.50    4.20
   6 -13   2   21.10    5.20
  -7  13  -2  407.26   17.30
   7 -13   2  404.66   19.30
   7 -13   2  404.96   18.60
   8 -13   2    8.70    3.90
   8 -13   2    1.70    3.50
   9 -13   2  154.38   10.70
   9 -13   2  166.28   11.60
   9 -13   2  165.48   11.00
  10 -13   2   94.09    9.40
  10 -13   2   78.19    7.70
  10 -13   2   59.19    7.10
  11 -13   2    6.90    3.60
  11 -13   2    5.20    3.60
  11 -13   2   15.00    5.50
  12 -13   2   -0.40    3.00
  12 -13   2   -1.40    2.90
  12 -13   2   -1.20    4.80
  13 -13   2   10.10    6.20
  13 -13   2    6.60    3.60
  13 -13   2    7.80    3.70
  13  12  -2    3.90    3.90
  13  12  -2    1.20    5.60
  13  12  -2    4.80    3.90
  12  12  -2   84.69    9.90
  12  12  -2   79.89    8.20
  12  12  -2   84.99    8.40
  12  12  -2   83.09    6.80
  11  12  -2   42.80    6.20
  11  12  -2   45.60    7.10
  11  12  -2   49.70    5.60
  11  12  -2   48.70    6.10
  10  12  -2  124.99    8.60
  10  12  -2  141.19    9.80
  10  12  -2  120.19    8.60
  10  12  -2  132.99   10.10
   9  12  -2   57.69    6.30
   9  12  -2   57.09    6.70
   9  12  -2   59.29    7.00
   9  12  -2   60.09    6.00
   8  12  -2  231.98   11.10
   8  12  -2  219.48   12.30
   8  12  -2  222.98   12.50
   8  12  -2  222.58   11.90
   7  12  -2   26.00    4.70
   7  12  -2   25.50    3.60
   7  12  -2   23.20    4.50
   7  12  -2   22.80    4.50
   6  12  -2   -1.80    2.60
   6  12  -2    4.20    3.00
   6  12  -2   -4.20    2.00
  -6 -12   2   -2.70    2.10
   5  12  -2   -3.20    2.60
   5  12  -2    0.40    2.40
   5  12  -2    6.80    2.90
  -5 -12   2    5.50    3.00
   4  12  -2   17.30    4.10
   4  12  -2   15.50    4.00
   4  12  -2   16.90    3.30
  -4 -12   2   22.40    4.50
   3  12  -2   25.20    4.30
   3  12  -2   41.90    5.70
   3  12  -2   30.70    3.80
  -3 -12   2   45.50    6.10
   2  12  -2  467.85   19.80
   2  12  -2  496.25   18.10
   2  12  -2  452.75   19.90
  -2 -12   2  477.35   22.10
  -2 -12   2  513.95   20.20
   1  12  -2   97.89    7.30
   1  12  -2   89.79    5.10
   1  12  -2   92.19    7.30
  -1 -12   2  101.99    7.20
  -1 -12   2   87.39    8.20
   0  12  -2  202.38    8.30
   0  12  -2  223.08   11.20
   0  12  -2  203.98   11.10
   0 -12   2  211.28    8.50
   0 -12   2  217.68    8.30
   0 -12   2  206.38   12.80
   0 -12   2  205.78   10.70
  -1  12  -2   48.60    5.80
  -1  12  -2   30.60    4.60
   1 -12   2   46.40    6.70
   1 -12   2   39.00    3.10
   1 -12   2   44.80    3.60
   1 -12   2   41.40    5.00
  -2  12  -2   85.99    7.10
  -2  12  -2   87.69    7.00
   2 -12   2   90.19    4.90
   2 -12   2  100.79    6.70
   2 -12   2  100.69    4.50
   2 -12   2   94.19    8.30
   2 -12   2   86.19    5.60
  -3  12  -2   -1.20    2.50
   3 -12   2   -2.20    1.20
   3 -12   2   -1.30    2.30
   3 -12   2    0.20    1.50
   3 -12   2    0.60    1.80
   3 -12   2   -2.40    1.70
   3 -12   2   -1.10    1.50
  -4  12  -2  538.55   20.80
   4 -12   2  506.25   20.20
   4 -12   2  498.05   22.40
   4 -12   2  502.15   19.30
   4 -12   2  514.65   18.80
   4 -12   2  517.85   19.60
   4 -12   2  516.15   18.30
  -5  12  -2   66.09    6.20
   5 -12   2   70.79    6.50
   5 -12   2   62.99    4.80
   5 -12   2   64.09    4.40
   5 -12   2   67.39    4.90
   5 -12   2   72.09    7.50
   5 -12   2   64.89    4.60
  -6  12  -2  596.64   23.50
   6 -12   2  608.54   22.30
   6 -12   2  607.04   25.60
   6 -12   2  623.74   24.50
  -7  12  -2   99.79    6.80
   7 -12   2   91.79    6.10
   7 -12   2   99.69    8.50
   7 -12   2   68.19    7.40
   8 -12   2  476.65   21.20
   8 -12   2  460.65   21.00
   8 -12   2  499.75   19.20
   9 -12   2   60.19    7.20
   9 -12   2   48.70    6.40
   9 -12   2   66.09    6.10
   9 -12   2   63.99    7.40
  10 -12   2   84.29    7.70
  10 -12   2   85.39    7.70
  10 -12   2   84.99    6.90
  10 -12   2   78.69    8.90
  11 -12   2   40.10    5.60
  11 -12   2   39.10    5.60
  11 -12   2   41.60    7.00
  11 -12   2   52.19    6.40
  12 -12   2   81.29    8.10
  12 -12   2   76.69    7.30
  12 -12   2   61.09    7.00
  12 -12   2   76.99    9.40
  13 -12   2   43.00    5.60
  13 -12   2   44.70    8.10
  13 -12   2   39.70    5.40
  13 -12   2   41.10    6.60
  14  11  -2   12.60    6.80
  14  11  -2   10.10    4.70
  13  11  -2   39.60    7.50
  13  11  -2   50.39    6.70
  13  11  -2   51.09    6.50
  12  11  -2   42.80    7.10
  12  11  -2   27.30    5.20
  12  11  -2   34.40    5.50
  11  11  -2  331.97   14.60
  11  11  -2  339.97   16.20
  11  11  -2  331.67   16.00
  11  11  -2  361.56   17.90
  10  11  -2   18.00    4.80
  10  11  -2    9.00    3.30
  10  11  -2    5.40    3.10
  10  11  -2    7.20    3.40
   9  11  -2   -2.90    2.60
   9  11  -2    5.00    2.80
   9  11  -2   -2.70    2.50
   9  11  -2    5.40    3.70
   8  11  -2  171.68    9.80
   8  11  -2  149.59    9.20
   8  11  -2  142.99    9.70
   8  11  -2  155.08    8.70
   7  11  -2  193.98    9.60
   7  11  -2  188.78   10.70
   7  11  -2  203.48   10.70
   7  11  -2  190.88   10.80
   6  11  -2  695.83   25.20
   6  11  -2  704.93   27.00
   6  11  -2  705.43   26.80
   6  11  -2  682.33   26.50
  -6 -11   2  690.93   27.20
   5  11  -2  258.47   12.20
   5  11  -2  275.17   13.00
   5  11  -2  265.97   13.00
  -5 -11   2  260.57   13.10
   4  11  -2  105.89    7.50
   4  11  -2  102.89    7.40
   4  11  -2  123.59    6.90
  -4 -11   2   98.39    7.40
   3  11  -2   83.09    6.80
   3  11  -2  100.79    5.90
   3  11  -2   91.29    7.00
  -3 -11   2  106.09    7.30
   2  11  -2   56.19    4.10
   2  11  -2   53.59    5.50
   2  11  -2   48.40    5.30
  -2 -11   2   43.70    5.50
  -2 -11   2   43.00    5.10
   1  11  -2  106.99    7.20
   1  11  -2  104.59    7.20
   1  11  -2  103.39    5.30
  -1 -11   2   97.69    4.40
  -1 -11   2  103.79    8.50
  -1 -11   2  101.19    7.10
   0  11  -2  111.59    7.50
   0  11  -2  115.89    7.50
   0  11  -2  127.99    5.40
   0 -11   2  114.99    7.40
   0 -11   2  113.79    5.50
   0 -11   2  118.49    8.80
   0 -11   2  114.29    5.20
  -1  11  -2  183.78    9.80
  -1  11  -2  176.88    6.70
  -1  11  -2  193.78    9.80
   1 -11   2  190.88   11.20
   1 -11   2  182.48    7.40
   1 -11   2  184.68    8.20
   1 -11   2  179.78    9.30
   1 -11   2  184.38    9.50
  -2  11  -2  659.73   25.50
  -2  11  -2  680.33   25.40
   2 -11   2  671.93   24.90
   2 -11   2  640.84   24.70
   2 -11   2  660.43   24.10
   2 -11   2  704.63   27.50
   2 -11   2  686.83   23.10
  -3  11  -2  205.58   10.50
  -3  11  -2  226.08   11.00
   3 -11   2  223.18    8.80
   3 -11   2  217.08   10.10
   3 -11   2  211.18    8.90
   3 -11   2  214.78    9.90
   3 -11   2  231.78   12.50
   3 -11   2  214.48   10.10
  -4  11  -2  160.88    8.70
   4 -11   2  160.58    8.60
   4 -11   2  161.98    7.20
   4 -11   2  147.79    7.80
   4 -11   2  156.98    7.70
   4 -11   2  159.38    7.40
   4 -11   2  160.58   10.20
  -5  11  -2   63.89    5.70
   5 -11   2   64.89    6.10
   5 -11   2   69.69    7.70
   5 -11   2   58.89    4.60
   5 -11   2   58.89    4.30
   5 -11   2   58.59    4.30
   5 -11   2   58.79    4.60
  -6  11  -2  324.17   14.10
   6 -11   2  330.67   15.20
   6 -11   2  338.97   13.40
   6 -11   2  316.67   15.70
  -7  11  -2  227.78   11.00
   7 -11   2  233.38   10.80
   7 -11   2  238.08   12.80
   7 -11   2  250.67   12.80
   8 -11   2  136.49    9.40
   8 -11   2  136.59    9.40
   8 -11   2  161.78   10.20
   8 -11   2  145.89    8.30
   9 -11   2  132.59    9.10
   9 -11   2  121.29    7.90
   9 -11   2  132.49    9.10
   9 -11   2  122.99    9.60
  10 -11   2    2.40    3.30
  10 -11   2    9.00    3.30
  10 -11   2   -2.20    2.20
  10 -11   2   -0.40    2.50
  11 -11   2  100.49    7.70
  11 -11   2   87.49    7.50
  11 -11   2   91.89    7.70
  11 -11   2   97.99    9.80
  12 -11   2   -0.30    2.90
  12 -11   2    2.20    2.70
  12 -11   2   -2.40    3.70
  12 -11   2    1.00    2.70
  13 -11   2   98.69    7.50
  13 -11   2  108.09    9.30
  13 -11   2   92.79    7.70
  13 -11   2  123.09   12.10
  14 -11   2   11.70    5.10
  14 -11   2   -0.50    5.70
  14  10  -2   48.40    7.40
  14  10  -2   52.69    8.90
  13  10  -2    3.30    3.00
  13  10  -2    0.30    4.60
  13  10  -2    1.70    3.50
  12  10  -2   83.29    8.00
  12  10  -2   74.19    8.80
  12  10  -2   78.59    7.30
  11  10  -2    2.00    1.80
  11  10  -2    3.30    2.20
  11  10  -2    4.90    2.90
  11  10  -2    4.30    3.20
  11  10  -2    1.20    3.50
  10  10  -2  894.01   32.00
  10  10  -2  906.21   33.30
  10  10  -2  874.21   34.60
  10  10  -2  885.51   33.20
   9  10  -2    5.10    2.80
   9  10  -2    3.80    3.30
   9  10  -2    5.80    3.00
   9  10  -2    4.80    2.60
   8  10  -2  327.77   14.30
   8  10  -2  324.07   14.40
   8  10  -2  322.37   14.80
   8  10  -2  330.67   15.60
   7  10  -2    2.30    2.60
   7  10  -2   -0.60    2.40
   7  10  -2    2.90    2.40
   7  10  -2    4.20    2.20
  -7 -10   2    2.50    2.90
   6  10  -2   24.70    4.30
   6  10  -2   21.00    3.90
   6  10  -2   32.70    3.80
   6  10  -2   26.70    3.90
   6  10  -2   22.60    4.70
  -6 -10   2   25.80    3.80
   5  10  -2   27.80    5.10
   5  10  -2   18.40    3.40
   5  10  -2   23.50    3.90
   5  10  -2   17.70    3.50
   5  10  -2   20.70    2.90
  -5 -10   2   19.20    3.90
   4  10  -2  313.37   13.00
   4  10  -2  303.57   13.70
   4  10  -2  291.77   15.10
   4  10  -2  324.27   13.90
  -4 -10   2  323.07   14.00
  -4 -10   2  276.97   15.00
   3  10  -2   35.60    5.80
   3  10  -2   27.30    3.60
   3  10  -2   35.10    3.80
   3  10  -2   30.80    4.20
  -3 -10   2   25.30    4.60
  -3 -10   2   39.70    4.90
   2  10  -2  209.18   10.60
   2  10  -2  234.28   10.80
   2  10  -2  219.68    9.40
  -2 -10   2  215.28   12.20
  -2 -10   2  208.78   10.60
   1  10  -2  394.46   16.70
   1  10  -2  414.76   15.00
  -1 -10   2  409.16   16.80
  -1 -10   2  419.76   18.50
  -1 -10   2  404.66   14.10
   0  10  -2  830.02   31.50
   0  10  -2  930.81   29.50
   0  10  -2  900.01   31.90
   0 -10   2  874.11   29.20
   0 -10   2  846.12   31.40
   0 -10   2  859.81   29.60
   0 -10   2  906.21   33.60
  -1  10  -2  183.28    9.30
  -1  10  -2  181.48    9.20
  -1  10  -2  177.28    6.60
   1 -10   2  181.68    9.00
   1 -10   2  172.48    7.10
   1 -10   2  179.08   10.60
   1 -10   2  182.78    8.80
   1 -10   2  181.58    7.90
  -2  10  -2   40.30    4.40
  -2  10  -2   42.50    4.40
   2 -10   2   37.20    4.00
   2 -10   2   39.60    2.90
   2 -10   2   40.90    3.90
   2 -10   2   46.80    4.80
   2 -10   2   55.59    6.40
  -3  10  -2  201.48    9.60
   3 -10   2  184.28    9.00
   3 -10   2  211.08   11.20
   3 -10   2  192.88    9.00
   3 -10   2  202.08    8.10
   3 -10   2  190.88    8.10
   3 -10   2  186.68    9.10
  -4  10  -2   22.20    3.80
  -4  10  -2   23.90    3.50
   4 -10   2   32.10    3.10
   4 -10   2   28.30    3.30
   4 -10   2   31.60    3.10
   4 -10   2   27.50    3.80
   4 -10   2   27.10    4.60
   4 -10   2   24.20    3.10
  -5  10  -2   17.40    3.10
   5 -10   2    8.40    1.90
   5 -10   2   12.90    2.50
   5 -10   2    8.90    2.90
   5 -10   2   15.60    2.40
   5 -10   2   14.40    3.30
  -6  10  -2  553.64   21.00
   6 -10   2  569.24   20.70
   6 -10   2  548.95   22.30
   6 -10   2  561.74   22.90
  -7  10  -2  133.69    7.30
   7 -10   2  149.69    9.50
   7 -10   2  136.59    7.60
   7 -10   2  128.79    8.80
   8 -10   2   59.19    5.60
   8 -10   2   67.29    6.40
   8 -10   2   60.79    6.10
   8 -10   2   68.29    7.30
   9 -10   2  115.19    9.10
   9 -10   2  109.99    7.90
   9 -10   2  106.49    7.50
   9 -10   2  118.29    8.30
  10 -10   2    2.20    3.40
  10 -10   2    4.90    2.90
  10 -10   2    8.10    3.00
  10 -10   2    9.10    3.10
  11 -10   2   20.30    4.00
  11 -10   2   20.90    4.30
  11 -10   2   13.20    4.70
  11 -10   2   14.20    3.60
  12 -10   2  133.39    9.50
  12 -10   2  123.09   10.90
  12 -10   2  127.29    8.40
  12 -10   2  131.49    8.60
  13 -10   2   19.60    3.90
  13 -10   2   22.20    5.30
  13 -10   2   25.40    4.10
  13 -10   2   25.60    6.30
  14 -10   2  135.99   10.90
  14 -10   2  113.99   11.90
  15   9  -2   10.80    5.30
  15   9  -2    4.10    5.70
  14   9  -2    6.80    5.30
  14   9  -2    8.40    4.40
  13   9  -2   92.89    9.90
  13   9  -2  139.59    9.70
  13   9  -2  103.49    7.80
  12   9  -2   32.50    7.70
  12   9  -2   36.40    4.90
  12   9  -2   29.30    5.70
  12   9  -2   26.60    5.00
  11   9  -2  280.37   11.70
  11   9  -2  317.97   16.10
  11   9  -2  286.87   16.10
  11   9  -2  306.57   14.60
  11   9  -2  306.27   13.90
  10   9  -2   28.40    5.50
  10   9  -2   27.80    3.70
  10   9  -2   33.90    5.60
  10   9  -2   36.70    4.70
  10   9  -2   31.20    3.50
  10   9  -2   31.00    4.60
   9   9  -2  181.08   10.00
   9   9  -2  177.48    9.20
   9   9  -2  186.38   11.20
   9   9  -2  200.98   12.20
   9   9  -2  178.28    8.90
   9   9  -2  177.88    9.80
   8   9  -2    0.20    1.60
   8   9  -2    0.70    2.10
   8   9  -2    4.90    3.00
   8   9  -2    2.70    2.30
   8   9  -2    1.00    2.50
   8   9  -2   -1.30    2.00
   7   9  -2  777.72   28.00
   7   9  -2  741.93   27.40
   7   9  -2  703.73   29.70
   7   9  -2  757.22   27.60
   7   9  -2  763.22   27.40
   7   9  -2  773.02   28.60
  -7  -9   2  745.53   28.30
   6   9  -2  195.98    9.70
   6   9  -2  221.18   10.30
   6   9  -2  203.68   10.20
   6   9  -2  205.28    9.40
   6   9  -2  191.28   11.50
   6   9  -2  194.88   10.20
  -6  -9   2  216.38   10.70
   5   9  -2  605.94   24.00
   5   9  -2  648.74   23.10
   5   9  -2  662.03   24.00
   5   9  -2  656.83   24.40
   5   9  -2  664.63   26.30
   5   9  -2  636.64   24.10
  -5  -9   2  633.04   24.50
   4   9  -2  436.56   17.60
   4   9  -2  460.65   19.90
   4   9  -2  488.05   18.40
   4   9  -2  437.86   18.00
  -4  -9   2  472.85   18.50
   3   9  -2 1763.12   61.09
   3   9  -2 1769.72   60.19
   3   9  -2 1793.92   61.19
   3   9  -2 1878.51   63.19
  -3  -9   2 1858.91   63.19
  -3  -9   2 1795.72   61.19
   2   9  -2  176.88    7.80
   2   9  -2  188.08    9.10
   2   9  -2  183.78    9.00
  -2  -9   2  174.78    9.00
  -2  -9   2  155.18    9.80
   1   9  -2   83.49    5.80
   1   9  -2   72.89    4.20
   1   9  -2   70.99    5.50
  -1  -9   2   73.09    3.50
  -1  -9   2   71.49    5.50
  -1  -9   2   76.89    6.60
   0   9  -2    6.00    2.20
   0   9  -2    2.20    2.10
   0  -9   2    4.10    1.00
   0  -9   2    4.80    2.00
   0  -9   2    3.10    2.50
   0  -9   2    3.10    1.30
  -1   9  -2  221.18    8.00
  -1   9  -2  223.48   10.30
   1  -9   2  239.08   10.30
   1  -9   2  231.18    9.30
   1  -9   2  229.38    8.50
   1  -9   2  215.58   10.00
   1  -9   2  234.78   11.80
  -2   9  -2  299.57   12.50
  -2   9  -2  275.17   12.50
   2  -9   2  299.47   11.80
   2  -9   2  296.57   12.10
   2  -9   2  293.67   13.80
   2  -9   2  283.57   12.10
   2  -9   2  300.87   10.80
  -3   9  -2  102.29    6.20
  -3   9  -2  103.19    6.30
   3  -9   2  100.59    5.70
   3  -9   2   99.29    5.00
   3  -9   2  105.19    7.30
   3  -9   2   99.39    5.80
   3  -9   2   98.69    6.00
   3  -9   2  103.19    5.10
  -4   9  -2   -2.40    1.50
  -4   9  -2   -1.70    1.70
   4  -9   2    0.80    1.40
   4  -9   2    0.70    1.40
   4  -9   2   -0.20    1.80
   4  -9   2    0.60    1.40
   4  -9   2   -1.90    1.60
   4  -9   2    0.90    1.20
  -5   9  -2  108.99    6.60
  -5   9  -2   99.39    6.10
   5  -9   2   99.99    5.10
   5  -9   2   94.79    6.60
   5  -9   2  106.19    5.30
   5  -9   2   99.49    7.20
   5  -9   2   99.99    5.70
  -6   9  -2   13.30    2.60
   6  -9   2    9.40    2.90
   6  -9   2    9.60    2.40
   6  -9   2    4.40    2.70
   7  -9   2  336.87   15.20
   7  -9   2  324.07   13.90
   7  -9   2  342.67   15.50
   8  -9   2   13.60    3.20
   8  -9   2   20.60    3.80
   8  -9   2   19.70    3.50
   8  -9   2   17.70    4.10
   9  -9   2   37.10    4.90
   9  -9   2   38.90    5.10
   9  -9   2   42.80    5.00
   9  -9   2   38.00    5.80
  10  -9   2   75.49    8.10
  10  -9   2   84.89    6.80
  10  -9   2   75.89    6.60
  10  -9   2   91.29    7.10
  11  -9   2   54.09    5.80
  11  -9   2   49.60    7.10
  11  -9   2   50.39    5.60
  11  -9   2   46.40    6.00
  12  -9   2    0.50    2.20
  12  -9   2    1.00    3.90
  12  -9   2   -1.80    2.90
  12  -9   2   -0.90    2.20
  13  -9   2   18.00    3.60
  13  -9   2   16.20    4.70
  13  -9   2   21.30    5.70
  13  -9   2   16.90    3.50
  14  -9   2  209.78   13.70
  14  -9   2  234.08   15.60
  15  -9   2   64.29    8.50
  15  -9   2   51.39    9.10
  15   8  -2   -0.80    4.00
  15   8  -2   -5.00    4.50
  15   8  -2    0.30    3.60
  14   8  -2   18.70    5.10
  14   8  -2   23.30    6.30
  14   8  -2   27.10    5.40
  13   8  -2    2.50    3.40
  13   8  -2    2.90    3.50
  13   8  -2   -1.80    2.40
  13   8  -2   -1.60    3.30
  12   8  -2  102.19    7.10
  12   8  -2  110.99    8.90
  12   8  -2  121.69    9.60
  12   8  -2  107.39    9.50
  11   8  -2   36.20    5.40
  11   8  -2   45.10    4.90
  11   8  -2   40.20    5.90
  11   8  -2   55.79    7.10
  10   8  -2  732.63   25.60
  10   8  -2  708.03   25.40
  10   8  -2  734.43   27.90
  10   8  -2  732.43   27.00
  10   8  -2  761.62   29.70
  10   8  -2  687.93   28.70
   9   8  -2   19.00    3.70
   9   8  -2   14.80    3.30
   9   8  -2   17.90    2.50
   9   8  -2   23.10    4.90
   9   8  -2   17.90    2.70
   9   8  -2   15.00    4.10
   9   8  -2   18.90    2.90
   8   8  -2   58.09    4.40
   8   8  -2   56.79    4.80
   8   8  -2   58.59    6.30
   8   8  -2   51.59    3.10
   8   8  -2   53.59    6.30
   8   8  -2   59.29    5.50
   8   8  -2   49.80    5.10
   7   8  -2   37.80    4.60
   7   8  -2   46.50    5.80
   7   8  -2   44.10    4.60
   7   8  -2   49.30    4.70
   7   8  -2   36.90    4.20
   7   8  -2   33.60    3.70
  -7  -8   2   43.00    5.00
   6   8  -2  457.05   19.10
   6   8  -2  436.26   16.60
   6   8  -2  434.66   17.20
   6   8  -2  442.66   14.70
   6   8  -2  438.96   17.60
   6   8  -2  409.06   16.90
   6   8  -2  386.66   16.50
  -6  -8   2  447.76   17.60
   5   8  -2  234.88   10.50
   5   8  -2  252.67   10.30
   5   8  -2  235.88   10.90
   5   8  -2  238.58   11.00
   5   8  -2  241.28   11.00
   5   8  -2  240.78   12.40
  -5  -8   2  255.27   11.30
   4   8  -2 1051.09   35.10
   4   8  -2  973.10   33.60
   4   8  -2  928.91   33.80
   4   8  -2  933.01   33.80
   4   8  -2  934.01   32.70
   4   8  -2  929.71   35.40
  -4  -8   2  990.10   35.70
  -4  -8   2  960.40   34.00
   3   8  -2   21.20    3.10
   3   8  -2   27.20    4.20
   3   8  -2   21.80    3.10
   3   8  -2   24.40    2.90
  -3  -8   2   19.80    3.40
  -3  -8   2   28.20    3.60
   2   8  -2 1614.54   54.79
   2   8  -2 1583.64   51.99
   2   8  -2 1481.05   52.89
   2   8  -2 1593.34   53.09
  -2  -8   2 1532.95   54.59
  -2  -8   2 1611.34   53.19
   1   8  -2  123.99    6.80
   1   8  -2  118.89    6.70
   1   8  -2  118.99    5.50
  -1  -8   2  118.99    7.90
  -1  -8   2  114.69    6.60
  -1  -8   2  118.49    4.80
   0   8  -2 1332.67   45.90
   0   8  -2 1422.16   44.20
   0   8  -2 1371.76   45.90
   0  -8   2 1360.86   45.90
   0  -8   2 1360.36   44.40
   0  -8   2 1224.98   47.10
   0  -8   2 1366.86   43.80
  -1   8  -2   21.60    3.00
  -1   8  -2   18.50    1.50
  -1   8  -2   19.20    2.90
   1  -8   2   13.50    2.40
   1  -8   2   16.00    3.10
   1  -8   2   17.90    2.70
   1  -8   2   19.50    2.40
   1  -8   2   20.60    1.90
  -2   8  -2  100.49    5.80
  -2   8  -2   98.09    6.00
   2  -8   2  102.89    5.50
   2  -8   2  108.29    5.80
   2  -8   2   99.79    6.80
   2  -8   2   99.89    5.50
   2  -8   2   99.59    4.60
  -3   8  -2   36.40    3.80
  -3   8  -2   36.70    3.70
   3  -8   2   37.80    3.50
   3  -8   2   44.50    5.20
   3  -8   2   39.10    3.80
   3  -8   2   45.40    3.10
   3  -8   2   36.00    3.30
  -4   8  -2  234.18   10.60
  -4   8  -2  249.78   10.50
   4  -8   2  248.68   11.80
   4  -8   2  247.58   11.00
   4  -8   2  241.78    9.90
   4  -8   2  251.67    9.90
   4  -8   2  247.28   10.00
   4  -8   2  237.88    9.90
  -5   8  -2    2.20    1.60
   5  -8   2    0.40    1.10
   5  -8   2    1.80    1.30
   5  -8   2   -1.00    1.90
   5  -8   2    0.00    1.50
   5  -8   2    0.70    1.40
  -6   8  -2  544.25   19.50
   6  -8   2  526.35   21.20
   6  -8   2  523.25   21.20
   6  -8   2  539.75   20.00
   7  -8   2   -0.40    0.80
   7  -8   2   -0.20    2.30
   7  -8   2    1.00    1.70
   7  -8   2    1.80    1.90
   7  -8   2    0.40    1.70
   8  -8   2   88.99    4.40
   8  -8   2   75.69    6.20
   8  -8   2   87.39    6.20
   8  -8   2   82.89    7.20
   8  -8   2   97.79    6.80
   9  -8   2   53.49    5.70
   9  -8   2   61.29    6.00
   9  -8   2   51.39    3.70
   9  -8   2   48.80    6.20
   9  -8   2   56.29    5.50
  10  -8   2    7.50    3.90
  10  -8   2    9.20    2.80
  10  -8   2    5.70    3.10
  10  -8   2    5.70    2.50
  11  -8   2   45.90    7.00
  11  -8   2   43.90    5.90
  11  -8   2   45.50    5.20
  11  -8   2   48.80    5.40
  12  -8   2  208.58   12.20
  12  -8   2  206.48   10.80
  12  -8   2  237.08   14.00
  12  -8   2  213.18   10.80
  13  -8   2   73.39    6.10
  13  -8   2   88.19    8.60
  13  -8   2   76.89    9.30
  13  -8   2   75.49    6.10
  14  -8   2  121.49   10.10
  14  -8   2  114.99   11.70
  15  -8   2   53.29    8.70
  15  -8   2   60.59    8.20
  16   7  -2   -2.60    3.20
  16   7  -2   -2.40    5.60
  16   7  -2   -1.60    4.80
  15   7  -2    3.70    4.40
  15   7  -2    7.60    5.60
  15   7  -2    9.80    4.20
  14   7  -2    2.00    3.40
  14   7  -2    5.00    4.30
  14   7  -2   10.20    3.80
  13   7  -2   16.60    4.40
  13   7  -2    9.10    3.90
  13   7  -2   18.40    5.10
  12   7  -2   55.79    7.10
  12   7  -2   38.90    5.80
  12   7  -2   56.19    7.00
  12   7  -2   54.49    5.20
  12   7  -2   46.40    6.40
  11   7  -2   69.59    6.90
  11   7  -2   57.39    7.20
  11   7  -2   58.19    4.70
  11   7  -2   65.29    5.70
  11   7  -2   64.89    7.10
  10   7  -2   31.10    4.60
  10   7  -2   31.90    5.00
  10   7  -2   34.00    3.50
  10   7  -2   32.00    5.00
  10   7  -2   29.60    3.90
   9   7  -2   46.00    4.50
   9   7  -2   37.60    5.20
   9   7  -2   42.50    3.50
   9   7  -2   47.30    4.00
   9   7  -2   49.20    3.70
   9   7  -2   42.00    4.80
   9   7  -2   55.59    6.20
   8   7  -2   22.90    2.80
   8   7  -2   24.10    4.20
   8   7  -2   26.70    4.40
   8   7  -2   21.60    3.50
   8   7  -2   24.60    2.40
   8   7  -2   20.70    2.80
   8   7  -2   21.90    3.20
  -8  -7   2   24.50    4.00
   7   7  -2  413.56   17.20
   7   7  -2  416.36   15.70
   7   7  -2  404.26   16.30
   7   7  -2  421.66   15.90
   7   7  -2  409.06   16.30
   7   7  -2  411.26   17.90
   7   7  -2  418.16   14.40
  -7  -7   2  406.76   16.60
   6   7  -2  300.87   13.00
   6   7  -2  305.27   10.30
   6   7  -2  299.87   12.00
   6   7  -2  301.27   12.30
   6   7  -2  290.97   13.80
   6   7  -2  296.67   12.20
   6   7  -2  306.27   12.60
  -6  -7   2  272.27   12.60
   5   7  -2  248.58   10.20
   5   7  -2  237.98   10.50
   5   7  -2  223.48   10.70
   5   7  -2  238.08   10.20
   5   7  -2  248.18   10.70
   5   7  -2  236.28   11.90
  -5  -7   2  254.37   10.90
   4   7  -2    6.90    2.10
   4   7  -2    6.10    2.00
   4   7  -2    7.10    2.20
   4   7  -2    7.30    2.00
   4   7  -2    6.90    2.00
   4   7  -2    3.80    1.70
  -4  -7   2    3.60    2.20
  -4  -7   2    7.40    2.30
   3   7  -2  233.28   10.60
   3   7  -2  246.68   11.90
   3   7  -2  262.77   10.50
   3   7  -2  252.57   10.90
  -3  -7   2  273.17   12.30
  -3  -7   2  260.87   11.00
   2   7  -2  270.77   10.60
   2   7  -2  273.57   11.30
   2   7  -2  258.17   11.20
   2   7  -2  280.27   12.60
  -2  -7   2  290.97   11.50
  -2  -7   2  249.68   12.30
   1   7  -2  579.24   20.40
   1   7  -2  576.54   19.30
   1   7  -2  571.84   20.40
  -1  -7   2  497.05   21.20
  -1  -7   2  556.24   18.60
  -1  -7   2  543.35   20.30
   0   7  -2 1114.69   36.50
   0   7  -2 1123.39   38.00
   0  -7   2 1110.59   36.80
   0  -7   2 1113.19   39.30
   0  -7   2 1112.89   38.00
   0  -7   2 1100.29   36.10
  -1   7  -2 1417.06   48.10
  -1   7  -2 1461.25   46.20
  -1   7  -2 1453.35   48.30
   1  -7   2 1399.56   47.30
   1  -7   2 1497.35   46.50
   1  -7   2 1458.65   47.90
   1  -7   2 1327.67   49.20
   1  -7   2 1438.16   48.00
  -2   7  -2   28.20    3.20
  -2   7  -2   36.50    3.80
   2  -7   2   30.40    3.30
   2  -7   2   30.10    2.40
   2  -7   2   34.70    3.40
   2  -7   2   29.60    3.00
   2  -7   2   34.30    4.20
  -3   7  -2  342.87   12.90
  -3   7  -2  344.17   13.10
   3  -7   2  333.17   13.10
   3  -7   2  320.67   12.50
   3  -7   2  327.07   12.00
   3  -7   2  321.97   12.60
   3  -7   2  312.67   14.00
  -4   7  -2   11.90    2.40
  -4   7  -2   17.10    2.50
   4  -7   2   11.70    2.50
   4  -7   2   15.50    2.10
   4  -7   2   13.70    2.10
   4  -7   2   10.00    2.40
   4  -7   2   16.00    2.30
  -5   7  -2  786.62   26.10
   5  -7   2  753.72   25.20
   5  -7   2  749.62   27.30
   5  -7   2  767.32   26.40
   5  -7   2  680.23   27.30
   5  -7   2  729.83   24.40
   5  -7   2  760.12   25.30
   6  -7   2  204.28   10.20
   6  -7   2  214.88   10.50
   6  -7   2  216.68   10.20
   6  -7   2  197.98    9.40
   6  -7   2  208.98    7.80
   7  -7   2  238.28   10.80
   7  -7   2  243.58   11.30
   7  -7   2  242.28    9.20
   7  -7   2  241.28   11.90
   7  -7   2  225.88   11.10
   8  -7   2   25.40    3.80
   8  -7   2   25.10    3.80
   8  -7   2   30.90    4.20
   8  -7   2   29.40    2.80
   8  -7   2   29.00    4.50
   9  -7   2    2.50    2.80
   9  -7   2   -0.30    1.70
   9  -7   2    0.60    1.40
   9  -7   2   -0.60    1.90
   9  -7   2    0.20    1.90
  10  -7   2   91.49    6.60
  11  -7   2  209.18   10.70
  11  -7   2  226.38   12.00
  11  -7   2  215.48   13.00
  11  -7   2  209.28    9.90
  11  -7   2  214.08   10.70
  12  -7   2   10.90    3.80
  12  -7   2    4.80    2.50
  12  -7   2    5.10    4.20
  12  -7   2    2.90    2.20
  12  -7   2    2.60    2.30
  13  -7   2  161.58   11.90
  13  -7   2  162.18   10.90
  13  -7   2  150.88    8.60
  13  -7   2  157.28    8.70
  14  -7   2    4.40    4.20
  14  -7   2    2.90    4.60
  15  -7   2   78.69   10.00
  15  -7   2   83.39    9.30
  16  -7   2    6.30    6.50
  16  -7   2   16.80    6.60
  16   6  -2   29.70    6.70
  16   6  -2   31.80    5.60
  16   6  -2   29.20    7.10
  15   6  -2   15.30    5.30
  15   6  -2   26.70    6.30
  15   6  -2   23.90    5.10
  14   6  -2   84.49    7.90
  14   6  -2   86.99    7.90
  14   6  -2   64.29    7.90
  14   6  -2   88.79    9.50
  13   6  -2   -1.70    2.20
  13   6  -2    3.30    3.40
  13   6  -2    1.00    2.70
  13   6  -2   -1.30    3.10
  12   6  -2  106.09    6.40
  12   6  -2  112.09    8.50
  12   6  -2  118.89    9.40
  12   6  -2   99.69    8.20
  12   6  -2   96.79    6.60
  11   6  -2    2.40    2.50
  11   6  -2   -4.20    2.90
  11   6  -2    0.90    2.90
  11   6  -2    1.10    1.90
  11   6  -2    0.30    1.70
  10   6  -2  159.28    7.70
  10   6  -2  158.88   10.00
  10   6  -2  140.29    8.90
  10   6  -2  146.39    9.30
  10   6  -2  154.08    7.90
   9   6  -2   41.20    5.20
   9   6  -2   33.20    3.70
   9   6  -2   35.40    2.80
   9   6  -2   30.50    4.70
   9   6  -2   33.70    4.40
   9   6  -2   35.00    3.40
   8   6  -2  288.97   10.90
   8   6  -2  282.77   13.40
   8   6  -2  286.37   11.10
   8   6  -2  275.37   11.70
   8   6  -2  278.37   10.80
   8   6  -2  282.57   13.20
   8   6  -2  277.97   12.40
  -8  -6   2  262.97   11.90
   7   6  -2    4.40    2.20
   7   6  -2    7.40    1.90
   7   6  -2    7.50    1.70
   7   6  -2    5.20    2.20
   7   6  -2    7.90    2.30
   7   6  -2    4.30    1.90
   7   6  -2    5.60    1.40
  -7  -6   2    4.70    1.90
   6   6  -2  738.13   25.70
   6   6  -2  737.53   23.60
   6   6  -2  691.53   26.20
   6   6  -2  716.63   27.10
   6   6  -2  714.63   25.10
   6   6  -2  714.63   25.60
   6   6  -2  722.73   25.20
   6   6  -2  711.93   24.00
   5   6  -2   87.99    5.00
   5   6  -2   69.99    5.20
   5   6  -2   83.79    6.00
   5   6  -2   78.29    3.60
   5   6  -2   73.49    4.80
   5   6  -2   79.99    4.60
   5   6  -2   75.79    4.90
  -5  -6   2   78.49    5.10
   4   6  -2   39.30    3.20
   4   6  -2   36.60    3.30
   4   6  -2   50.69    5.40
   4   6  -2   33.60    3.50
   4   6  -2   36.60    3.60
   4   6  -2   42.80    3.80
  -4  -6   2   51.19    4.70
   3   6  -2    0.20    1.60
   3   6  -2    2.10    1.60
   3   6  -2   -0.70    1.20
   3   6  -2    1.20    1.20
   3   6  -2    2.80    2.00
   3   6  -2    1.60    1.50
  -3  -6   2    1.00    1.20
  -3  -6   2    0.90    1.90
   2   6  -2 1773.22   56.09
   2   6  -2 1732.83   55.39
   2   6  -2 1750.82   57.39
   2   6  -2 1667.83   55.89
  -2  -6   2 1532.75   56.89
  -2  -6   2 1654.83   55.99
   1   6  -2    3.90    2.60
   1   6  -2    1.00    1.70
   1   6  -2    2.20    1.20
   1   6  -2    2.50    1.50
  -1  -6   2    3.90    2.10
  -1  -6   2    3.30    1.60
  -1  -6   2    4.80    1.00
   0   6  -2 1424.76   46.40
   0   6  -2 1339.77   47.50
   0   6  -2 1463.35   47.80
   0  -6   2 1435.96   46.70
   0  -6   2 1455.55   48.90
   0  -6   2 1392.76   45.90
   0  -6   2 1479.35   47.70
  -1   6  -2   19.70    2.80
  -1   6  -2   16.10    2.50
   1  -6   2   15.90    1.40
   1  -6   2   13.30    2.10
   1  -6   2   13.30    1.90
   1  -6   2   13.00    1.90
  -2   6  -2  139.99    6.80
  -2   6  -2  139.09    6.90
   2  -6   2  151.68    6.70
   2  -6   2  143.69    6.50
   2  -6   2  142.19    5.80
   2  -6   2  152.88    7.80
   2  -6   2  150.28    6.70
  -3   6  -2  210.88    8.90
  -3   6  -2  226.18    9.20
   3  -6   2  215.48    8.70
   3  -6   2  215.18    8.40
   3  -6   2  210.68    8.60
   3  -6   2  200.78    9.20
   3  -6   2  217.68   10.00
  -4   6  -2   52.19    3.70
  -4   6  -2   58.19    4.20
   4  -6   2   50.89    2.50
   4  -6   2   54.49    3.70
   4  -6   2   55.69    4.60
   4  -6   2   58.99    4.50
   4  -6   2   56.69    3.40
   4  -6   2   58.89    3.50
   5  -6   2    6.40    1.20
   5  -6   2    3.50    1.70
   5  -6   2    8.00    1.40
   5  -6   2    6.10    2.20
   5  -6   2    5.00    1.80
   6  -6   2  236.68    9.00
   6  -6   2  253.27   11.40
   6  -6   2  237.78   10.40
   6  -6   2  232.38   10.80
   6  -6   2  224.28   10.70
   7  -6   2   68.59    3.90
   7  -6   2   57.99    5.00
   7  -6   2   67.79    5.80
   7  -6   2   58.79    4.90
   7  -6   2   63.89    5.10
   8  -6   2  344.57   13.30
   8  -6   2  376.76   15.10
   8  -6   2  323.17   14.50
   8  -6   2  370.36   15.90
   8  -6   2  343.97   14.60
   9  -6   2   25.00    4.00
   9  -6   2   24.10    3.60
   9  -6   2   20.50    3.00
   9  -6   2   24.30    3.60
   9  -6   2   20.00    4.30
  10  -6   2  301.97   13.50
  10  -6   2  331.77   14.80
  10  -6   2  306.37   12.90
  10  -6   2  320.17   15.60
  10  -6   2  295.97   13.40
  11  -6   2  133.89    7.70
  11  -6   2  132.69    9.20
  11  -6   2  148.49   10.30
  11  -6   2  123.59    7.70
  11  -6   2  134.79    7.90
  12  -6   2    9.00    2.60
  12  -6   2   11.20    3.10
  12  -6   2    5.40    3.80
  12  -6   2   13.60    3.00
  12  -6   2   13.30    4.20
  13  -6   2   16.30    3.30
  13  -6   2   35.80    6.40
  13  -6   2   13.50    4.50
  13  -6   2   19.30    3.30
  13  -6   2   24.30    4.00
  14  -6   2   15.60    5.40
  14  -6   2   12.40    4.70
  14  -6   2   17.50    3.90
  15  -6   2   -1.10    4.30
  15  -6   2    8.80    4.80
  16  -6   2  150.38   13.00
  16  -6   2  171.28   14.50
  17   5  -2  261.97   13.60
  17   5  -2  258.87   17.70
  17   5  -2  251.27   16.80
  16   5  -2   11.90    3.90
  16   5  -2   11.40    5.60
  16   5  -2   11.90    5.00
  15   5  -2  141.89    9.70
  15   5  -2  145.29   11.70
  15   5  -2  146.29    9.70
  15   5  -2  140.89   10.80
  14   5  -2   38.30    6.50
  14   5  -2   47.60    7.20
  14   5  -2   38.60    5.50
  14   5  -2   44.00    5.40
  13   5  -2  222.98   11.90
  13   5  -2  222.68   12.60
  13   5  -2  205.68   12.90
  13   5  -2  213.28   11.20
  12   5  -2  133.29    6.70
  12   5  -2  128.49    7.60
  12   5  -2  115.99    9.40
  12   5  -2  118.79    8.40
  12   5  -2  100.59    8.30
  11   5  -2  131.49    7.00
  11   5  -2  128.59    9.00
  11   5  -2  136.89    7.60
  11   5  -2  138.69    9.70
  11   5  -2  137.79    8.80
  10   5  -2   11.00    2.30
  10   5  -2   10.90    3.00
  10   5  -2   16.00    2.80
  10   5  -2   12.90    3.80
   9   5  -2   17.70    2.80
   9   5  -2   20.40    4.10
   9   5  -2   19.80    3.70
   9   5  -2   13.70    3.30
   9   5  -2   20.00    2.90
   8   5  -2   51.69    4.90
   8   5  -2   46.90    3.70
   8   5  -2   55.09    5.60
   8   5  -2   52.69    5.10
   8   5  -2   44.20    3.80
   8   5  -2   49.10    3.00
   7   5  -2  796.12   27.00
   7   5  -2  795.22   29.20
   7   5  -2  777.92   29.00
   7   5  -2  791.22   26.90
   7   5  -2  810.32   27.10
   7   5  -2  782.22   27.70
   7   5  -2  780.42   28.40
  -7  -5   2  820.92   29.40
   6   5  -2   57.49    4.30
   6   5  -2   55.99    4.80
   6   5  -2   56.09    3.30
   6   5  -2   66.99    3.70
   6   5  -2   54.79    4.10
   6   5  -2   64.89    5.10
   6   5  -2   60.99    3.90
   6   5  -2   59.19    2.70
  -6  -5   2   55.99    4.20
   5   5  -2  226.18    7.90
   5   5  -2  208.68    9.00
   5   5  -2  217.38    7.70
   5   5  -2  226.98    9.20
   5   5  -2  203.78    8.70
   5   5  -2  197.38    9.40
   5   5  -2  209.18    8.60
   5   5  -2  209.98   10.00
   4   5  -2  339.87   13.00
   4   5  -2  328.47   12.80
   4   5  -2  331.37   14.10
   4   5  -2  345.17   13.00
   4   5  -2  335.57   13.30
   4   5  -2  348.57   12.80
  -4  -5   2  364.66   13.20
   3   5  -2  442.86   17.10
   3   5  -2  469.65   17.00
   3   5  -2  483.15   17.30
   3   5  -2  459.35   17.10
   3   5  -2  471.55   18.30
   3   5  -2  493.95   16.80
  -3  -5   2  532.45   19.80
  -3  -5   2  472.05   17.30
   2   5  -2   17.80    2.40
   2   5  -2   18.40    2.10
   2   5  -2   13.50    1.90
   2   5  -2   19.00    3.10
  -2  -5   2   12.10    1.80
   1   5  -2   -0.20    1.50
   1   5  -2    0.80    1.10
   1   5  -2   -0.10    1.50
   1   5  -2    0.70    1.30
  -1  -5   2    0.20    1.30
  -1  -5   2    0.90    0.80
  -1  -5   2    1.60    1.70
   0   5  -2    1.20    1.40
   0   5  -2    0.80    1.30
   0  -5   2    4.60    1.60
   0  -5   2    1.10    1.00
   0  -5   2    0.20    1.30
  -1   5  -2  897.91   30.00
  -1   5  -2  911.61   30.20
   1  -5   2  891.01   30.00
   1  -5   2  773.82   30.80
   1  -5   2  920.91   30.00
   1  -5   2  919.51   28.90
   1  -5   2  887.31   29.70
  -2   5  -2 2123.49   67.79
  -2   5  -2 2045.70   67.89
   2  -5   2 2085.89   67.59
   2  -5   2 2029.10   67.89
   2  -5   2 2083.79   66.99
   2  -5   2 2029.10   68.69
   2  -5   2 2118.99   67.69
  -3   5  -2  120.69    6.00
  -3   5  -2  121.89    5.80
   3  -5   2  129.39    5.70
   3  -5   2  137.29    5.80
   3  -5   2  129.49    4.70
   3  -5   2  124.49    6.40
   3  -5   2  126.79    6.80
   4  -5   2   48.90    4.10
   4  -5   2   54.99    3.80
   4  -5   2   56.79    3.30
   4  -5   2   53.39    2.70
   4  -5   2   49.20    3.10
   4  -5   2   49.20    4.40
   5  -5   2  102.89    5.80
   5  -5   2   87.09    4.30
   5  -5   2   94.39    6.00
   5  -5   2  103.49    5.50
   5  -5   2   89.99    5.60
   6  -5   2  139.39    7.20
   6  -5   2  138.19    7.90
   6  -5   2  140.69    6.20
   6  -5   2  143.59    7.40
   7  -5   2  510.15   20.10
   7  -5   2  480.65   19.10
   7  -5   2  516.15   18.20
   7  -5   2  509.55   19.40
   8  -5   2  229.68   10.80
   8  -5   2  209.28   11.30
   8  -5   2  221.48    9.60
   8  -5   2  227.58   10.40
   9  -5   2   22.10    4.40
   9  -5   2   30.90    4.20
   9  -5   2   28.30    3.50
   9  -5   2   29.30    3.70
  10  -5   2    2.30    2.80
  10  -5   2    7.30    2.40
  10  -5   2    4.80    2.20
  10  -5   2    4.30    2.90
  11  -5   2  137.69    8.90
  11  -5   2  129.29    9.70
  11  -5   2  125.29    7.70
  11  -5   2  126.39    7.60
  12  -5   2   40.40    5.80
  12  -5   2   44.00    4.80
  12  -5   2   48.20    5.00
  12  -5   2   43.00    6.30
  12  -5   2   44.60    5.10
  13  -5   2  158.58    9.60
  13  -5   2  143.49    8.40
  13  -5   2  158.08   11.50
  13  -5   2  160.78   10.90
  13  -5   2  156.18    8.70
  14  -5   2  243.48   14.30
  14  -5   2  244.88   12.60
  14  -5   2  212.88   14.40
  15  -5   2   33.50    7.10
  15  -5   2   32.50    6.40
  15  -5   2   27.90    5.00
  16  -5   2   -8.50    4.80
  16  -5   2   -0.50    3.70
  16  -5   2    3.10    5.10
  17   4  -2   16.20    6.40
  17   4  -2   10.00    6.20
  17   4  -2   10.80    4.60
  16   4  -2  123.19    8.60
  16   4  -2  135.99   11.90
  16   4  -2  130.99   12.40
  16   4  -2  120.89    9.60
  15   4  -2    4.70    3.10
  15   4  -2    1.40    2.80
  15   4  -2    4.10    4.10
  15   4  -2    7.20    4.60
  14   4  -2  258.17   14.30
  14   4  -2  226.48   11.90
  14   4  -2  225.48   13.80
  14   4  -2  234.68   12.40
  13   4  -2   32.20    5.80
  13   4  -2   22.50    5.10
  13   4  -2   28.60    4.50
  13   4  -2   36.30    4.90
  12   4  -2  694.63   28.40
  12   4  -2  735.73   25.50
  12   4  -2  695.03   28.00
  12   4  -2  663.33   26.40
  12   4  -2  735.83   27.10
  11   4  -2   96.39    7.00
  11   4  -2   94.19    7.50
  11   4  -2   86.59    5.10
  11   4  -2   87.29    6.30
  11   4  -2   96.69    7.90
  10   4  -2  136.89    8.00
  10   4  -2  137.09    7.50
  10   4  -2  124.69    8.00
  10   4  -2  129.99    8.70
  10   4  -2  134.69    6.50
   9   4  -2  307.17   13.20
   9   4  -2  308.27   11.70
   9   4  -2  280.67   13.40
   9   4  -2  296.67   12.30
   9   4  -2  290.97   13.30
   8   4  -2   21.20    2.70
   8   4  -2   16.10    2.30
   8   4  -2   21.00    3.20
   8   4  -2   19.00    3.40
   8   4  -2   18.90    3.50
   7   4  -2   44.70    4.20
   7   4  -2   41.10    3.30
   7   4  -2   39.20    4.10
   7   4  -2   45.00    2.40
   7   4  -2   36.40    4.10
   7   4  -2   40.20    3.30
   6   4  -2  769.22   26.50
   6   4  -2  765.72   26.80
   6   4  -2  793.62   28.00
   6   4  -2  830.32   28.20
   6   4  -2  759.92   25.70
   6   4  -2  780.02   26.30
   6   4  -2  784.62   27.60
   6   4  -2  780.12   26.20
   5   4  -2   59.49    3.60
   5   4  -2   70.49    2.90
   5   4  -2   66.59    4.20
   5   4  -2   56.49    3.30
   5   4  -2   49.50    3.60
   5   4  -2   60.09    4.50
   5   4  -2   61.79    3.30
   5   4  -2   61.49    4.70
  -5  -4   2   63.79    4.00
   4   4  -2   95.39    4.00
   4   4  -2   91.39    4.70
   4   4  -2   86.99    4.80
   4   4  -2   90.69    4.80
   4   4  -2  101.29    4.00
   4   4  -2   85.79    5.10
   4   4  -2   96.89    4.50
   4   4  -2   96.09    5.70
  -4  -4   2   88.69    4.80
   3   4  -2  675.63   23.90
   3   4  -2  684.43   23.80
   3   4  -2  657.03   24.60
   3   4  -2  654.53   23.60
   3   4  -2  724.53   23.80
   3   4  -2  697.43   23.70
  -3  -4   2  774.82   24.10
   2   4  -2   57.69    3.70
   2   4  -2   61.49    3.60
   2   4  -2   62.99    3.30
   2   4  -2   60.99    4.40
   2   4  -2   59.59    3.40
   2   4  -2   62.19    3.60
  -2  -4   2   59.99    3.70
  -2  -4   2   57.69    4.30
   1   4  -2   82.89    4.40
   1   4  -2   85.39    3.90
   1   4  -2   81.39    4.50
   1   4  -2   87.59    5.20
  -1  -4   2   90.19    4.50
   0   4  -2 6012.00  186.18
   0   4  -2 5998.90  186.98
   0   4  -2 5212.78  186.78
   0  -4   2 6083.89  186.98
   0  -4   2 5849.11  187.88
  -1   4  -2 1981.80   70.09
  -1   4  -2 2160.18   70.09
   1  -4   2 2272.97   70.19
   1  -4   2 2210.78   69.99
   1  -4   2 2169.88   70.99
   1  -4   2 2151.98   70.09
  -2   4  -2  144.39    6.20
  -2   4  -2  142.29    6.40
   2  -4   2  152.48    6.30
   2  -4   2  145.59    6.30
   2  -4   2  149.79    6.70
   2  -4   2  160.18    7.20
  -3   4  -2  896.81   29.70
   3  -4   2  878.71   29.40
   3  -4   2  880.41   30.20
   3  -4   2  864.71   29.30
   3  -4   2  885.61   28.90
   4  -4   2  846.32   28.80
   4  -4   2  848.62   28.30
   4  -4   2  820.32   27.30
   4  -4   2  792.22   28.60
   4  -4   2  783.92   27.30
   4  -4   2  837.02   27.30
   5  -4   2  122.09    5.30
   5  -4   2  114.09    6.50
   5  -4   2  114.59    4.60
   5  -4   2  115.89    6.00
   5  -4   2  107.09    6.10
   6  -4   2   48.50    4.80
   6  -4   2   50.29    4.30
   6  -4   2   56.79    4.20
   6  -4   2   52.19    3.50
   7  -4   2   43.00    3.60
   7  -4   2   38.10    3.90
   7  -4   2   35.50    3.90
   7  -4   2   35.80    4.30
   8  -4   2  397.96   17.30
   8  -4   2  419.36   15.90
   8  -4   2  412.86   16.80
   8  -4   2  411.06   16.20
   9  -4   2   -1.10    2.10
   9  -4   2   -0.60    1.60
   9  -4   2   -0.50    2.30
   9  -4   2    0.90    1.70
  10  -4   2 1604.54   53.49
  10  -4   2 1566.44   55.29
  10  -4   2 1496.65   54.49
  10  -4   2 1576.04   53.29
  11  -4   2   36.20    5.60
  11  -4   2   33.80    4.50
  11  -4   2   34.50    4.20
  11  -4   2   41.30    5.50
  12  -4   2  116.29    7.70
  12  -4   2  109.49    7.10
  12  -4   2  106.29    8.70
  12  -4   2  104.49    8.60
  13  -4   2    0.20    2.80
  13  -4   2   -0.20    2.70
  13  -4   2    2.30    3.30
  13  -4   2   -2.00    1.90
  14  -4   2    5.00    4.00
  14  -4   2    0.60    3.70
  14  -4   2    0.30    2.90
  14  -4   2    1.40    2.00
  15  -4   2   35.40    6.70
  15  -4   2   35.40    5.70
  15  -4   2   39.00    6.90
  16  -4   2  271.57   15.10
  16  -4   2  307.67   17.70
  16  -4   2  258.57   17.10
  17   3  -2  238.98   15.70
  17   3  -2  265.47   16.60
  17   3  -2  238.48   14.50
  16   3  -2   78.99    8.40
  16   3  -2   81.49    9.90
  16   3  -2   84.49   10.00
  15   3  -2  161.18   10.80
  15   3  -2  180.78    9.50
  15   3  -2  188.58   12.70
  15   3  -2  177.08   12.40
  14   3  -2   -0.70    3.10
  14   3  -2    3.90    3.00
  14   3  -2    4.50    3.90
  14   3  -2    1.80    2.50
  13   3  -2   95.39    6.80
  13   3  -2   81.39    8.20
  13   3  -2   89.59    8.80
  13   3  -2   88.09    7.10
  12   3  -2    9.60    2.80
  12   3  -2   12.10    3.90
  12   3  -2   16.90    3.70
  12   3  -2   11.60    3.60
  11   3  -2  242.78   11.20
  11   3  -2  232.68    9.30
  11   3  -2  233.08   11.40
  11   3  -2  231.48   12.00
  11   3  -2  229.58   12.50
  10   3  -2   15.90    3.50
  10   3  -2   10.50    1.90
  10   3  -2   12.90    3.60
  10   3  -2    9.90    2.50
  10   3  -2   11.30    2.80
   9   3  -2  958.40   33.70
   9   3  -2  990.00   34.50
   9   3  -2  974.60   32.20
   9   3  -2  926.71   33.40
   9   3  -2  930.61   34.50
   8   3  -2    5.30    2.40
   8   3  -2    2.30    1.40
   8   3  -2    1.80    1.70
   8   3  -2    1.70    1.70
   8   3  -2    2.60    2.00
   7   3  -2  929.81   31.80
   7   3  -2  894.71   30.50
   7   3  -2  890.81   29.90
   7   3  -2  855.91   29.40
   7   3  -2  913.71   31.40
   7   3  -2  858.21   31.00
   6   3  -2   16.90    2.10
   6   3  -2   16.20    2.50
   6   3  -2   16.60    1.60
   6   3  -2   11.40    1.80
   6   3  -2   19.30    2.90
   6   3  -2   21.30    3.10
   5   3  -2   44.10    2.70
   5   3  -2   58.09    2.60
   5   3  -2   28.10    3.30
   5   3  -2   39.40    3.00
   4   3  -2  480.65   16.90
   4   3  -2  481.75   16.50
   4   3  -2  492.55   16.60
   4   3  -2  478.95   17.50
   4   3  -2  493.45   16.30
   4   3  -2  474.65   17.70
   4   3  -2  484.35   16.50
   4   3  -2  472.55   17.20
  -4  -3   2  502.65   18.90
   3   3  -2   59.29    2.80
   3   3  -2   52.19    3.30
   3   3  -2   54.39    3.60
   3   3  -2   60.69    3.40
   3   3  -2   60.19    4.00
   3   3  -2   55.99    3.10
   3   3  -2   58.79    3.50
  -3  -3   2   58.19    3.40
   2   3  -2   36.10    2.60
   2   3  -2   33.50    2.50
   2   3  -2   36.20    2.40
   2   3  -2   31.20    3.10
   2   3  -2   33.60    2.70
   2   3  -2   40.30    2.80
  -2  -3   2   37.00    2.70
   1   3  -2  177.08    7.20
   1   3  -2  187.28    7.20
   1   3  -2  186.58    6.90
   1   3  -2  183.78    7.20
   1   3  -2  188.68    7.90
  -1  -3   2  188.88    7.30
  -1  -3   2  177.18    6.20
   0   3  -2  546.05   18.50
   0   3  -2  541.95   18.60
   0   3  -2  562.44   18.00
   0  -3   2  548.05   18.60
   0  -3   2  494.95   19.10
  -1   3  -2  417.76   15.00
  -1   3  -2  409.16   14.90
   1  -3   2  443.96   15.00
   1  -3   2  440.66   15.00
  -2   3  -2  786.52   26.80
   2  -3   2  818.42   26.70
   2  -3   2  792.42   26.70
   2  -3   2  805.82   27.10
  -3   3  -2   19.00    2.10
   3  -3   2   12.20    2.00
   3  -3   2   15.80    1.70
   3  -3   2   16.50    1.60
   3  -3   2   16.50    1.80
   3  -3   2   22.70    2.60
   4  -3   2  258.27   10.90
   4  -3   2  268.27    9.70
   4  -3   2  264.67   10.00
   4  -3   2  271.07   10.90
   4  -3   2  272.77    9.70
   4  -3   2  288.57   10.80
   5  -3   2  375.46   14.50
   5  -3   2  388.16   15.00
   5  -3   2  378.56   13.80
   5  -3   2  368.36   14.40
   6  -3   2  121.19    6.40
   6  -3   2  116.29    6.50
   6  -3   2  112.59    6.60
   6  -3   2  123.39    5.90
   7  -3   2  395.66   14.90
   7  -3   2  386.86   15.60
   7  -3   2  372.96   15.10
   7  -3   2  397.36   16.10
   8  -3   2 1098.69   39.40
   8  -3   2 1161.68   40.00
   8  -3   2 1097.79   38.70
   8  -3   2 1111.69   38.50
   9  -3   2   31.20    3.90
   9  -3   2   23.50    4.00
   9  -3   2   26.20    4.00
   9  -3   2   32.00    3.80
   9  -3   2   34.60    2.00
  10  -3   2  220.38   11.00
  10  -3   2  250.37   11.10
  10  -3   2  227.28   12.30
  10  -3   2  236.78   12.20
  11  -3   2  423.46   18.80
  11  -3   2  454.15   19.60
  11  -3   2  425.36   17.20
  11  -3   2  409.56   17.90
  12  -3   2  196.58   10.10
  12  -3   2  216.78   12.20
  12  -3   2  215.18   12.50
  12  -3   2  194.38   11.00
  13  -3   2   -0.60    2.00
  13  -3   2   -2.10    2.90
  13  -3   2    1.50    2.70
  13  -3   2   -1.60    3.20
  14  -3   2   -0.10    3.00
  14  -3   2    0.30    3.30
  14  -3   2   -0.80    2.10
  14  -3   2    0.80    3.80
  15  -3   2   21.60    6.20
  15  -3   2   35.10    6.60
  15  -3   2   39.80    6.00
  16  -3   2    7.20    5.20
  16  -3   2    2.10    4.00
  16  -3   2   -3.30    4.60
  17   2  -2   -2.50    3.80
  17   2  -2    2.50    5.40
  17   2  -2    5.00    5.00
  16   2  -2  214.28   14.30
  16   2  -2  219.38   13.40
  16   2  -2  236.38   14.90
  15   2  -2   18.70    5.00
  15   2  -2   24.50    5.50
  15   2  -2   20.20    4.70
  14   2  -2  272.77   14.50
  14   2  -2  241.68   13.40
  14   2  -2  269.37   14.60
  13   2  -2   47.80    6.50
  13   2  -2   51.29    6.30
  13   2  -2   50.89    5.00
  13   2  -2   53.89    6.20
  12   2  -2  135.49    8.50
  12   2  -2  129.99    8.90
  12   2  -2  131.89    7.50
  12   2  -2  134.49    9.20
  11   2  -2    7.30    3.10
  11   2  -2    8.70    2.90
  11   2  -2    9.70    2.60
  11   2  -2    6.70    3.00
  10   2  -2   49.90    5.40
  10   2  -2   61.49    5.10
  10   2  -2   52.09    5.60
  10   2  -2   59.59    3.30
  10   2  -2   62.19    4.70
   9   2  -2  217.68    8.20
   9   2  -2  211.48    9.50
   9   2  -2  209.18   10.70
   9   2  -2  223.48   10.10
   9   2  -2  209.08   10.60
   8   2  -2 2103.99   71.09
   8   2  -2 2213.58   72.39
   8   2  -2 2190.78   69.99
   8   2  -2 2101.09   72.09
   8   2  -2 2192.78   71.59
   7   2  -2   18.80    3.10
   7   2  -2   19.50    2.60
   7   2  -2   15.20    1.90
   7   2  -2   18.40    2.00
   7   2  -2   17.10    3.00
   7   2  -2   19.40    2.60
   6   2  -2 1381.46   46.40
   6   2  -2 1409.16   45.50
   6   2  -2 1409.26   45.50
   6   2  -2 1424.26   46.30
   6   2  -2 1350.96   46.80
   6   2  -2 1377.26   47.00
   5   2  -2  208.28    9.00
   5   2  -2  212.58    8.40
   5   2  -2  209.58    8.80
   5   2  -2  213.78    8.70
   5   2  -2  222.98    8.00
   5   2  -2  205.58    7.80
   4   2  -2   27.70    2.80
   4   2  -2   30.70    2.80
   4   2  -2   26.20    2.70
   4   2  -2   27.50    2.00
   4   2  -2   28.50    2.20
   4   2  -2   28.80    2.40
   3   2  -2  179.28    7.40
   3   2  -2  178.68    6.90
   3   2  -2  183.98    6.60
   3   2  -2  179.88    6.60
   3   2  -2  182.48    6.70
   3   2  -2  170.58    7.10
   3   2  -2  191.68    6.70
   3   2  -2  182.28    7.40
   2   2  -2 1058.09   34.30
   2   2  -2 1008.00   34.50
   2   2  -2 1086.69   34.30
   2   2  -2 1034.80   34.50
   2   2  -2 1097.99   35.00
   2   2  -2 1044.90   34.40
  -2  -2   2 1014.80   34.30
   1   2  -2   22.70    2.00
   1   2  -2   22.20    1.80
   1   2  -2   23.60    1.30
   1   2  -2   23.80    2.00
   1   2  -2   27.60    2.10
  -1  -2   2   16.50    1.80
  -1  -2   2   20.80    1.20
  -1  -2   2   23.90    2.00
   0   2  -2 1616.44   52.49
   0   2  -2 1665.23   52.49
   0  -2   2 1576.64   52.49
  -1   2  -2   91.59    4.20
   1  -2   2  100.09    4.20
   1  -2   2   91.19    4.20
  -2   2  -2   10.30    1.50
   2  -2   2   13.80    1.60
   2  -2   2   12.80    1.50
   2  -2   2   11.10    1.60
  -3   2  -2   -0.30    1.00
   3  -2   2    0.90    1.30
   3  -2   2    0.50    0.80
   3  -2   2    0.90    0.90
   3  -2   2    1.90    1.00
   3  -2   2    0.70    1.10
   4  -2   2   39.60    3.50
   4  -2   2   38.30    3.20
   4  -2   2   35.70    2.40
   4  -2   2   39.60    2.90
   4  -2   2   35.60    2.40
   4  -2   2   37.90    3.00
   5  -2   2   76.69    4.80
   5  -2   2   79.99    4.80
   5  -2   2   77.09    3.50
   5  -2   2   74.19    5.00
   5  -2   2   77.69    4.30
   6  -2   2   57.79    4.10
   6  -2   2   49.60    4.30
   6  -2   2   54.09    3.90
   6  -2   2   51.39    4.60
   7  -2   2    2.10    1.50
   7  -2   2    5.60    1.90
   7  -2   2    4.20    2.00
   7  -2   2    4.50    1.80
   8  -2   2  719.53   26.30
   8  -2   2  732.13   26.40
   8  -2   2  740.53   27.40
   8  -2   2  769.82   27.30
   8  -2   2  703.33   24.10
   9  -2   2    3.40    1.90
   9  -2   2    4.80    1.00
   9  -2   2    3.80    2.40
   9  -2   2    3.50    2.70
   9  -2   2    4.90    2.40
  10  -2   2  274.67   13.10
  10  -2   2  273.57   12.50
  10  -2   2  259.47   13.30
  10  -2   2  261.97   12.00
  11  -2   2    7.10    2.80
  11  -2   2    7.00    3.60
  11  -2   2    1.90    2.70
  11  -2   2    7.60    2.60
  12  -2   2   76.39    7.90
  12  -2   2   98.99    7.40
  12  -2   2   65.59    7.20
  12  -2   2   82.19    6.30
  13  -2   2   22.40    4.70
  13  -2   2   23.70    4.00
  13  -2   2   28.40    5.60
  13  -2   2   29.10    5.50
  14  -2   2   18.90    4.60
  14  -2   2   25.30    4.10
  14  -2   2   18.10    5.20
  14  -2   2   22.00    4.90
  15  -2   2    7.10    2.90
  15  -2   2    4.20    3.70
  15  -2   2    5.50    4.40
  15  -2   2    5.10    4.60
  16  -2   2  128.59   12.50
  16  -2   2  134.99   11.00
  16  -2   2  105.59   11.10
  17   1  -2   77.19    9.60
  17   1  -2   54.99    8.10
  17   1  -2   56.19    8.60
  16   1  -2   48.50    7.10
  16   1  -2   37.20    6.90
  16   1  -2   58.39    8.30
  15   1  -2    2.10    3.20
  15   1  -2    0.80    3.10
  15   1  -2   -1.00    3.40
  14   1  -2   13.40    4.30
  14   1  -2    5.60    3.40
  14   1  -2   19.30    4.90
  13   1  -2  198.08   11.70
  13   1  -2  188.98   11.80
  13   1  -2  212.28   11.70
  12   1  -2  207.98   11.60
  12   1  -2  225.08   12.10
  12   1  -2  221.08   11.50
  11   1  -2  526.85   21.50
  11   1  -2  509.45   21.10
  11   1  -2  533.65   19.00
  11   1  -2  503.05   20.80
  10   1  -2    2.90    2.40
  10   1  -2    0.90    1.60
  10   1  -2    2.70    2.30
  10   1  -2    0.70    2.00
   9   1  -2  320.97   13.70
   9   1  -2  303.67   13.00
   9   1  -2  302.27   11.80
   9   1  -2  293.27   13.20
   8   1  -2  351.46   12.10
   8   1  -2  355.96   14.60
   8   1  -2  354.66   14.20
   8   1  -2  338.27   13.10
   8   1  -2  350.56   14.60
   7   1  -2  712.33   24.50
   7   1  -2  735.03   25.90
   7   1  -2  735.63   23.70
   7   1  -2  702.63   25.40
   7   1  -2  707.53   24.50
   7   1  -2  703.83   25.80
   6   1  -2   52.99    3.20
   6   1  -2   54.19    2.70
   6   1  -2   59.39    4.00
   6   1  -2   54.49    4.00
   6   1  -2   51.49    3.40
   6   1  -2   53.19    4.20
   5   1  -2  931.41   33.10
   5   1  -2  988.60   33.20
   5   1  -2  995.70   31.90
   5   1  -2  975.60   32.40
   5   1  -2  991.70   32.30
   5   1  -2  977.10   32.90
   4   1  -2 1238.18   38.10
   4   1  -2 1185.18   38.90
   4   1  -2 1145.69   38.40
   4   1  -2 1147.09   38.30
   4   1  -2 1160.68   38.70
   4   1  -2 1171.48   39.00
   4   1  -2 1151.18   39.00
   3   1  -2  662.03   21.00
   3   1  -2  602.44   21.60
   3   1  -2  622.24   21.60
   3   1  -2  637.64   21.30
   3   1  -2  652.33   21.50
   3   1  -2  638.94   21.10
   3   1  -2  629.54   21.30
   2   1  -2    3.10    0.60
   2   1  -2    3.50    0.70
   2   1  -2    2.40    1.00
   2   1  -2    3.30    0.90
   2   1  -2    3.30    0.90
   2   1  -2    2.50    0.90
   2   1  -2    1.40    1.00
   1   1  -2 1690.33   55.69
   1   1  -2 1778.02   55.59
   1   1  -2 1788.02   55.59
   1   1  -2 1771.82   55.39
  -1  -1   2 1616.04   55.59
  -1   1  -2 1904.41   58.39
   1  -1   2 1842.22   58.79
   1  -1   2 1705.33   58.29
   1  -1   2 1776.02   58.29
  -2   1  -2  399.56   14.60
   2  -1   2  468.85   15.40
   2  -1   2  425.26   14.60
   2  -1   2  420.16   14.70
   2  -1   2  419.56   14.60
  -3   1  -2 1223.98   39.00
   3  -1   2 1138.19   39.50
   3  -1   2 1134.49   38.80
   3  -1   2 1184.58   38.80
   3  -1   2 1176.28   39.40
   3  -1   2 1167.18   39.20
   3  -1   2 1290.27   39.80
   4  -1   2 2080.09   67.29
   4  -1   2 2065.49   66.29
   4  -1   2 2067.39   66.99
   4  -1   2 2030.10   66.29
   4  -1   2 2105.79   67.49
   4  -1   2 1962.10   67.29
   5  -1   2  439.06   15.60
   5  -1   2  474.05   17.20
   5  -1   2  450.85   16.70
   5  -1   2  452.85   15.70
   5  -1   2  447.46   17.20
   5  -1   2  506.25   17.30
   6  -1   2    1.40    0.80
   6  -1   2   -1.30    1.60
   6  -1   2   -1.40    1.40
   6  -1   2    0.00    1.40
   6  -1   2    1.10    1.60
   7  -1   2  288.07   12.10
   7  -1   2  254.77   11.40
   7  -1   2  262.97    9.80
   7  -1   2  290.67   11.70
   7  -1   2  296.37   12.30
   8  -1   2   83.99    6.20
   8  -1   2   93.09    5.90
   8  -1   2   92.39    6.40
   8  -1   2   89.19    5.90
   8  -1   2   92.09    4.00
   9  -1   2  265.17   12.60
   9  -1   2  256.47   12.00
   9  -1   2  260.77    9.40
   9  -1   2  263.27   12.50
   9  -1   2  263.67   11.70
  10  -1   2    5.20    2.40
  10  -1   2    4.60    2.60
  10  -1   2    4.10    2.90
  10  -1   2    8.00    1.20
  10  -1   2    3.20    2.90
  11  -1   2  249.58   13.20
  11  -1   2  245.98   13.00
  11  -1   2  248.28   11.90
  11  -1   2  250.67   12.50
  12  -1   2   12.40    3.00
  12  -1   2   11.90    3.60
  12  -1   2   15.30    4.20
  12  -1   2   16.80    4.40
  13  -1   2  281.77   15.00
  13  -1   2  273.37   13.00
  13  -1   2  284.67   14.60
  13  -1   2  252.67   14.30
  14  -1   2    9.90    4.00
  14  -1   2   12.60    5.00
  14  -1   2   11.30    3.30
  14  -1   2    9.50    4.30
  15  -1   2   38.40    5.00
  15  -1   2   30.50    6.30
  15  -1   2   34.90    6.40
  15  -1   2   42.80    7.40
  16  -1   2   59.19    6.10
  16  -1   2   54.09    8.30
  16  -1   2   45.80    7.90
  16  -1   2   64.69    8.30
  17   0  -2    9.30    5.50
  17   0  -2    3.60    4.30
  17   0  -2    2.30    4.50
  16   0  -2  110.99    9.90
  16   0  -2  111.49   10.90
  16   0  -2  121.79   10.20
  15   0  -2   47.20    6.80
  15   0  -2   52.09    7.10
  15   0  -2   64.69    8.10
  14   0  -2  210.68   12.20
  14   0  -2  212.48   12.50
  14   0  -2  182.78   11.80
  13   0  -2   81.39    7.90
  13   0  -2   77.19    7.90
  13   0  -2   78.59    7.80
  12   0  -2  234.08   11.70
  12   0  -2  192.58   11.10
  12   0  -2  193.78   11.30
  11   0  -2  146.19    9.00
  11   0  -2  164.68    9.70
  11   0  -2  157.08    9.20
  10   0  -2    2.90    2.20
  10   0  -2    7.00    2.60
  10   0  -2    4.80    2.40
   9   0  -2  129.09    7.60
   9   0  -2  132.49    7.60
   9   0  -2  141.59    7.70
   8   0  -2  824.82   29.70
   8   0  -2  846.82   30.00
   8   0  -2  828.12   29.70
   7   0  -2   -0.80    1.60
   7   0  -2    2.60    1.90
   7   0  -2   -1.10    1.20
   7   0  -2    2.70    1.90
   6   0  -2  229.18    9.60
   6   0  -2  207.58    9.40
   6   0  -2  229.08    9.00
   6   0  -2  234.18    9.60
   5   0  -2  369.46   13.80
   5   0  -2  370.46   13.70
   5   0  -2  347.37   13.70
   5   0  -2  374.06   13.30
   5   0  -2  379.86   13.80
   4   0  -2    3.90    1.30
   4   0  -2    4.20    1.50
   4   0  -2    6.40    1.60
   4   0  -2    6.10    1.60
   4   0  -2    5.40    1.70
   3   0  -2   48.90    3.00
   3   0  -2   48.20    2.80
   3   0  -2   45.60    2.90
   3   0  -2   43.80    2.90
   3   0  -2   43.50    2.70
   2   0  -2 2050.69   66.39
   2   0  -2 2067.59   66.39
   2   0  -2 2095.09   66.39
   2   0  -2 2054.79   66.29
   2   0  -2 2023.40   66.39
   1   0  -2  706.83   22.50
   1   0  -2  711.33   22.90
   1   0  -2  648.24   22.40
   1   0  -2  702.13   22.80
  -1   0   2  703.73   22.50
   0   0  -2  558.34   18.70
   0   0  -2  530.15   18.30
   0   0   2  587.24   18.40
   0   0   2  552.04   18.70
  -1   0  -2  953.20   30.30
   1   0   2  966.90   30.80
   1   0   2  966.90   30.30
   1   0   2  822.42   30.20
  -2   0  -2  706.93   24.80
   2   0   2  732.73   24.70
   2   0   2  738.43   24.70
   2   0   2  742.43   25.00
   2   0   2  811.92   25.40
   3   0   2  652.03   22.00
   3   0   2  660.43   22.60
   3   0   2  659.43   22.80
   3   0   2  655.73   22.50
   3   0   2  659.53   22.00
  -4   0  -2  256.47    9.70
   4   0   2  244.48   10.20
   4   0   2  253.97   10.00
   4   0   2  268.17    9.40
   4   0   2  251.47    9.10
   4   0   2  255.07   10.20
   4   0   2  253.07    9.30
   4   0   2  257.67   10.20
   5   0   2  568.84   19.10
   5   0   2  583.64   20.60
   5   0   2  571.74   20.60
   5   0   2  568.04   20.40
   5   0   2  542.05   19.20
   5   0   2  570.34   20.60
   5   0   2  566.24   19.30
   6   0   2 1216.18   39.80
   6   0   2 1197.48   39.80
   6   0   2 1205.18   41.60
   6   0   2 1245.98   41.50
   6   0   2 1249.28   41.60
   6   0   2 1193.08   39.80
   6   0   2 1221.38   41.60
   7   0   2  391.16   15.00
   7   0   2  362.86   14.90
   7   0   2  348.17   14.50
   7   0   2  373.76   14.70
   7   0   2  343.27   12.70
   8   0   2  535.75   20.60
   8   0   2  556.04   20.80
   8   0   2  527.35   18.40
   8   0   2  542.35   21.00
   8   0   2  547.15   21.10
   9   0   2    7.60    2.60
   9   0   2    7.20    2.70
   9   0   2   12.30    2.80
   9   0   2    3.90    2.40
   9   0   2    7.80    1.40
  10   0   2  445.76   18.70
  10   0   2  442.86   15.30
  10   0   2  427.46   18.60
  10   0   2  461.65   18.70
  10   0   2  424.56   17.90
  11   0   2   75.09    7.30
  11   0   2   92.29    6.90
  11   0   2   94.19    7.80
  11   0   2   76.69    7.40
  12   0   2   10.70    3.80
  12   0   2   15.60    4.20
  12   0   2   19.80    3.80
  12   0   2   16.00    4.30
  13   0   2  118.29    9.40
  13   0   2   87.79    8.60
  13   0   2   95.49    7.50
  13   0   2  115.79    9.30
  14   0   2   36.40    6.30
  14   0   2   48.20    5.70
  14   0   2   45.00    6.60
  14   0   2   49.30    6.90
  15   0   2    2.60    4.10
  15   0   2    4.80    4.30
  15   0   2    3.50    3.90
  15   0   2    8.10    3.40
  16   0   2  100.39   11.20
  16   0   2   92.39    9.90
  16   0   2   96.79    8.00
  16   0   2   95.49   10.10
  17  -1  -2  246.18   15.30
  17  -1  -2  245.18   14.80
  17  -1  -2  222.68   15.70
  16  -1  -2   28.50    6.00
  16  -1  -2   40.00    7.00
  16  -1  -2   32.10    6.90
  15  -1  -2    1.50    3.10
  15  -1  -2   -1.30    3.00
  15  -1  -2    4.20    3.60
  14  -1  -2  134.89   10.10
  14  -1  -2  141.59    9.80
  14  -1  -2  128.99   10.00
  13  -1  -2    2.30    2.60
  13  -1  -2   -0.80    3.10
  13  -1  -2    0.20    3.00
  12  -1  -2   71.49    7.20
  12  -1  -2   63.69    7.00
  12  -1  -2   59.89    6.40
  11  -1  -2  287.67   13.80
  11  -1  -2  302.27   13.60
  11  -1  -2  281.17   13.80
  10  -1  -2  106.29    6.90
  10  -1  -2  108.39    7.30
  10  -1  -2   96.09    6.80
   9  -1  -2    3.60    2.20
   9  -1  -2    1.50    1.80
   9  -1  -2   -0.10    1.90
   8  -1  -2   20.10    3.20
   8  -1  -2   19.00    3.00
   8  -1  -2   24.20    3.30
   7  -1  -2  199.88    8.90
   7  -1  -2  199.28    9.10
   7  -1  -2  196.58    9.20
   6  -1  -2    6.30    2.10
   6  -1  -2    5.80    1.80
   6  -1  -2    9.70    1.90
   6  -1  -2    5.60    2.00
   6  -1  -2    8.10    2.10
   5  -1  -2  411.76   14.80
   5  -1  -2  406.86   15.10
   5  -1  -2  422.96   15.20
   5  -1  -2  396.86   14.70
   5  -1  -2  397.16   14.90
   4  -1  -2 1631.84   53.09
   4  -1  -2 1604.74   52.89
   4  -1  -2 1589.94   52.99
   4  -1  -2 1640.54   53.29
   4  -1  -2 1628.34   53.19
   3  -1  -2  940.41   30.80
   3  -1  -2  927.11   30.90
   3  -1  -2  937.21   30.70
   3  -1  -2  916.21   30.70
   3  -1  -2  912.51   30.80
   2  -1  -2  180.28    6.90
   2  -1  -2  172.78    6.60
   2  -1  -2  178.78    6.80
   2  -1  -2  174.98    6.60
   1  -1  -2  887.11   28.10
   1  -1  -2  872.21   27.60
   1  -1  -2  804.62   27.60
   1  -1  -2  872.31   28.10
  -1   1   2  850.01   27.80
   0  -1  -2    1.60    0.80
   0  -1  -2    0.60    0.70
   0  -1  -2    0.60    0.60
  -1  -1  -2  694.43   23.10
  -1  -1  -2  698.03   23.40
  -1  -1  -2  715.53   23.90
   1   1   2  725.93   23.90
   1   1   2  689.13   23.30
   1   1   2  691.63   23.20
  -2  -1  -2  239.18   10.20
  -2  -1  -2  257.17    9.70
   2   1   2  237.08   10.10
   2   1   2  299.87    9.80
   2   1   2  279.57   10.00
   2   1   2  267.67    9.70
   2   1   2  276.07    9.50
  -3  -1  -2 2922.01   91.79
   3   1   2 2927.41   92.19
   3   1   2 2800.22   91.69
   3   1   2 2923.31   92.09
   3   1   2 2642.34   92.29
   3   1   2 2858.41   91.39
   3   1   2 2839.82   91.69
  -4  -1  -2  960.50   31.80
   4   1   2  912.81   31.20
   4   1   2  982.10   32.60
   4   1   2  884.81   31.40
   4   1   2  960.40   32.20
   4   1   2  941.01   31.50
   4   1   2  976.30   32.20
   4   1   2  968.00   32.30
  -5  -1  -2  980.10   32.00
   5   1   2  963.60   32.50
   5   1   2  932.41   32.30
   5   1   2  905.11   32.60
   5   1   2  896.11   31.40
   5   1   2  942.71   31.30
   5   1   2  973.90   31.50
   5   1   2  962.70   32.60
   6   1   2   63.09    4.50
   6   1   2   57.09    4.40
   6   1   2   48.30    3.30
   6   1   2   53.19    4.20
   6   1   2   53.09    3.10
   6   1   2   55.69    4.30
   6   1   2   58.19    3.30
   7   1   2  100.69    5.00
   7   1   2  113.39    6.80
   7   1   2  108.29    6.60
   7   1   2  114.99    6.60
   7   1   2  118.89    5.00
   7   1   2  139.79    5.20
   7   1   2   98.39    6.40
   8   1   2  387.66   16.20
   8   1   2  368.56   15.90
   8   1   2  398.26   16.30
   8   1   2  401.36   14.10
   8   1   2  410.96   16.20
   9   1   2  242.18   11.70
   9   1   2  244.08   11.60
   9   1   2  235.58   11.20
   9   1   2  228.48   11.50
   9   1   2  230.88    9.00
  10   1   2  228.28    9.10
  10   1   2  237.98   11.60
  10   1   2  243.68   12.10
  10   1   2  248.88   12.40
  10   1   2  234.08   12.00
  11   1   2  352.06   16.30
  11   1   2  351.16   16.50
  11   1   2  364.66   15.90
  11   1   2  373.16   16.80
  12   1   2    1.30    3.00
  12   1   2    2.30    3.20
  12   1   2    0.80    3.20
  12   1   2    3.90    2.80
  13   1   2   49.70    6.40
  13   1   2   46.70    6.60
  13   1   2   41.30    6.40
  14   1   2   23.60    4.40
  14   1   2   18.20    4.90
  14   1   2   21.20    5.20
  14   1   2   23.00    5.10
  15   1   2   94.69   10.30
  15   1   2  126.19   10.40
  15   1   2  105.69   10.30
  15   1   2  117.59    8.60
  16   1   2   29.00    5.00
  16   1   2   30.80    7.30
  16   1   2   28.40    6.80
  16   1   2   24.80    6.10
  17  -2  -2   46.30    7.20
  17  -2  -2   32.20    7.00
  17  -2  -2   32.90    7.10
  16  -2  -2  179.68   12.80
  16  -2  -2  178.58   12.90
  16  -2  -2  165.38   11.40
  15  -2  -2    6.20    3.60
  15  -2  -2    2.60    3.50
  15  -2  -2    6.30    4.00
  14  -2  -2   81.79    8.80
  14  -2  -2   88.69    8.20
  14  -2  -2   80.89    8.70
  13  -2  -2   76.09    7.90
  13  -2  -2   64.89    6.90
  13  -2  -2   62.19    7.20
  12  -2  -2  897.71   33.60
  12  -2  -2  876.21   33.20
  12  -2  -2  851.01   32.50
  11  -2  -2  143.19    9.00
  11  -2  -2  148.79    9.30
  11  -2  -2  143.29    8.50
  10  -2  -2   31.00    4.00
  10  -2  -2   31.80    4.40
  10  -2  -2   29.00    4.30
   9  -2  -2   33.00    3.90
   9  -2  -2   42.70    5.00
   9  -2  -2   36.30    4.50
   8  -2  -2    8.70    2.50
   8  -2  -2    7.20    2.40
   8  -2  -2    8.80    2.20
   7  -2  -2  101.29    6.10
   7  -2  -2  103.29    5.70
   7  -2  -2  108.49    6.00
   7  -2  -2  112.39    6.40
   6  -2  -2  126.49    6.30
   6  -2  -2  123.89    6.80
   6  -2  -2  131.89    6.50
   6  -2  -2  129.59    6.70
   6  -2  -2  121.29    6.10
   5  -2  -2    6.00    1.70
   4  -2  -2  422.76   15.10
   4  -2  -2  413.66   15.20
   4  -2  -2  408.96   15.00
   4  -2  -2  423.06   14.60
   4  -2  -2  416.76   14.80
  -4   2   2  413.06   13.80
   3  -2  -2  898.21   31.40
   3  -2  -2  980.70   31.60
   3  -2  -2  963.40   31.20
   3  -2  -2  939.81   31.00
   3  -2  -2  949.01   31.50
  -3   2   2  929.11   30.60
   2  -2  -2 1783.52   57.19
   2  -2  -2 1725.63   57.59
   2  -2  -2 1763.32   57.29
   2  -2  -2 1833.02   57.79
  -2   2   2 1779.22   57.19
   1  -2  -2  156.68    5.60
   1  -2  -2  153.88    6.10
   1  -2  -2  157.08    5.60
   1  -2  -2  159.28    6.00
   1  -2  -2  148.69    6.00
  -1   2   2  155.08    5.80
  -1   2   2  158.58    5.70
   0  -2  -2  750.12   25.50
   0  -2  -2  719.73   25.00
   0  -2  -2  770.62   25.00
   0  -2  -2  713.63   25.00
   0   2   2  733.53   25.00
   0   2   2  868.91   25.20
  -1  -2  -2    9.60    1.30
  -1  -2  -2   14.60    2.30
  -1  -2  -2   13.70    2.00
   1   2   2   10.00    1.50
   1   2   2    7.40    1.50
   1   2   2   10.00    1.70
  -2  -2  -2  136.29    5.20
  -2  -2  -2  148.49    6.60
   2   2   2  148.09    6.60
   2   2   2  138.79    6.20
   2   2   2  138.29    5.70
   2   2   2  136.79    5.80
   2   2   2  145.09    6.00
  -3  -2  -2   49.99    3.20
  -3  -2  -2   50.39    4.10
   3   2   2   45.70    2.80
   3   2   2   45.30    3.10
   3   2   2   44.30    3.10
   3   2   2   41.40    3.20
   3   2   2   39.00    3.40
   3   2   2   43.00    3.00
   4   2   2 6077.69  194.88
   4   2   2 6364.06  196.28
   4   2   2 5655.13  194.98
   4   2   2 6312.87  195.08
   4   2   2 6105.29  195.48
   4   2   2 6008.00  195.68
  -5  -2  -2    8.00    1.80
   5   2   2    8.50    2.10
   5   2   2   10.80    2.00
   5   2   2    7.90    1.70
   5   2   2    6.80    2.00
   5   2   2    9.70    1.70
   5   2   2   10.00    2.40
   5   2   2    9.80    1.60
  -6  -2  -2  180.38    7.90
   6   2   2  168.98    8.50
   6   2   2  174.78    8.40
   6   2   2  180.78    7.20
   6   2   2  175.38    7.30
   6   2   2  172.48    8.70
   6   2   2  180.78    7.40
   6   2   2  174.48    8.10
   7   2   2   76.39    5.60
   7   2   2   76.09    4.20
   7   2   2   75.39    5.10
   7   2   2   79.49    4.20
   7   2   2   72.69    4.00
   7   2   2   79.99    5.70
   7   2   2   86.69    5.60
   8   2   2    0.00    1.60
   8   2   2    0.80    1.10
   8   2   2    0.60    1.10
   8   2   2   -0.50    1.90
   8   2   2   -0.40    2.00
   8   2   2    1.90    1.80
   9   2   2   67.79    5.60
   9   2   2   65.29    5.70
   9   2   2   64.29    3.80
   9   2   2   52.89    5.70
   9   2   2   57.69    5.80
  10   2   2  341.87   12.80
  10   2   2  344.47   15.60
  10   2   2  335.17   15.10
  10   2   2  334.87   15.60
  10   2   2  338.97   15.20
  11   2   2  107.79    7.90
  11   2   2  118.09    8.00
  11   2   2  100.39    7.90
  11   2   2   96.89    8.20
  11   2   2  114.69    5.50
  12   2   2  322.67   15.30
  12   2   2  316.27   15.30
  12   2   2  314.27   15.80
  12   2   2  335.47   16.20
  13   2   2   37.20    6.20
  13   2   2   42.10    5.90
  13   2   2   34.70    6.00
  13   2   2   40.30    5.70
  14   2   2    3.30    3.50
  14   2   2    4.20    2.80
  14   2   2    5.20    4.10
  14   2   2    4.00    3.80
  15   2   2   26.30    5.00
  15   2   2   26.10    5.90
  15   2   2   30.70    6.60
  15   2   2   17.30    5.20
  16   2   2    2.40    4.20
  16   2   2    5.10    5.30
  16   2   2    2.30    3.30
  16   2   2    4.40    4.90
  17  -3  -2  113.79   10.50
  17  -3  -2   96.19   10.90
  17  -3  -2  122.39   11.90
  16  -3  -2    0.40    3.50
  16  -3  -2   -3.70    3.80
  16  -3  -2    2.10    4.20
  15  -3  -2  258.37   14.70
  15  -3  -2  237.88   13.20
  15  -3  -2  252.47   15.00
  14  -3  -2   22.30    5.30
  14  -3  -2   13.40    4.20
  14  -3  -2   16.90    4.00
  13  -3  -2  110.69    8.00
  13  -3  -2  106.49    9.10
  13  -3  -2  113.09    9.10
  12  -3  -2   66.79    6.50
  12  -3  -2   78.59    7.80
  12  -3  -2   78.49    7.50
  11  -3  -2    3.10    3.10
  11  -3  -2    6.40    2.70
  11  -3  -2    3.50    2.90
   9  -3  -2  507.65   19.90
   9  -3  -2  517.45   19.30
   9  -3  -2  499.65   20.30
   8  -3  -2  107.29    6.60
   8  -3  -2  101.19    5.70
   8  -3  -2  101.59    6.30
   8  -3  -2  104.39    6.50
   7  -3  -2  276.47   11.30
   7  -3  -2  255.77   11.50
   7  -3  -2  261.17   11.70
   7  -3  -2  272.67   10.80
   6  -3  -2    1.70    1.60
   6  -3  -2    0.70    1.70
   6  -3  -2    0.10    1.20
   6  -3  -2    1.40    1.70
  -6   3   2    2.10    0.60
   5  -3  -2  132.59    6.60
   5  -3  -2  140.69    6.10
   5  -3  -2  143.89    6.40
   5  -3  -2  141.49    7.00
   5  -3  -2  136.89    6.80
  -5   3   2  142.99    5.20
   4  -3  -2  170.58    6.90
   4  -3  -2  173.28    7.40
   4  -3  -2  169.48    7.20
   4  -3  -2  161.68    6.50
   4  -3  -2  158.68    7.30
  -4   3   2  164.38    6.10
   3  -3  -2 1386.06   46.30
   3  -3  -2 1415.16   46.50
   3  -3  -2 1456.65   45.90
   3  -3  -2 1349.36   46.40
   3  -3  -2 1383.86   45.70
   3  -3  -2 1454.35   45.70
  -3   3   2 1397.76   45.60
   2  -3  -2  226.88    8.40
   2  -3  -2  224.08    7.90
   2  -3  -2  214.68    8.50
   2  -3  -2  221.28    8.70
   2  -3  -2  229.78    8.60
  -2   3   2  223.68    8.20
   1  -3  -2 1441.66   47.80
   1  -3  -2 1475.75   47.70
   1  -3  -2 1446.26   48.10
   1  -3  -2 1477.55   47.40
   1  -3  -2 1417.36   47.40
  -1   3   2 1501.25   47.50
  -1   3   2 1495.25   47.70
   0  -3  -2  258.37    9.50
   0  -3  -2  250.27    9.60
   0  -3  -2  280.37   10.40
   0  -3  -2  236.98    9.50
   0   3   2  270.77    9.70
   0   3   2  301.37    9.80
  -1  -3  -2    4.90    1.10
  -1  -3  -2    3.60    1.30
  -1  -3  -2    5.90    1.90
   1   3   2    5.20    1.10
   1   3   2    6.30    1.40
   1   3   2    3.80    1.40
   1   3   2    5.00    1.70
   1   3   2    4.00    1.30
  -2  -3  -2 4619.04  146.19
  -2  -3  -2 4702.53  147.99
   2   3   2 4362.66  146.89
   2   3   2 4745.43  147.19
   2   3   2 4335.47  147.19
   2   3   2 4502.95  146.69
   2   3   2 4771.12  147.99
  -3  -3  -2  773.62   26.60
  -3  -3  -2  764.52   24.30
  -3  -3  -2  748.43   25.60
   3   3   2  724.23   25.30
   3   3   2  761.62   25.90
   3   3   2  732.53   25.40
   3   3   2  694.43   25.50
   3   3   2  787.42   26.50
   3   3   2  744.23   25.30
  -4  -3  -2   14.10    2.30
  -4  -3  -2   12.30    1.10
   4   3   2   13.60    2.00
   4   3   2   10.10    2.00
   4   3   2    8.70    1.90
   4   3   2   12.00    2.60
   4   3   2   12.70    2.20
   4   3   2   17.60    2.10
  -5  -3  -2 1152.78   37.80
   5   3   2 1104.79   38.30
   5   3   2 1105.19   37.20
   5   3   2 1168.98   38.90
   5   3   2 1123.39   37.50
   5   3   2 1072.79   37.90
   5   3   2 1085.09   37.30
   5   3   2 1104.79   37.50
  -6  -3  -2   12.40    2.30
   6   3   2   10.90    1.90
   6   3   2   11.30    2.70
   6   3   2    8.80    2.20
   6   3   2    9.60    1.80
   6   3   2    8.20    1.70
   6   3   2    9.90    2.00
   6   3   2   12.60    2.80
  -7  -3  -2  104.79    6.00
   7   3   2  107.89    6.10
   7   3   2  112.09    5.60
   7   3   2  107.49    6.60
   7   3   2  112.19    6.60
   7   3   2  111.09    5.40
   7   3   2  103.19    5.30
   7   3   2  101.49    6.70
  -8  -3  -2   54.69    4.50
   8   3   2   56.29    5.20
   8   3   2   54.59    4.60
   8   3   2   56.29    5.30
   8   3   2   52.09    3.70
   8   3   2   56.19    3.60
   8   3   2   45.80    5.10
   8   3   2   50.89    3.70
   9   3   2   37.20    3.00
   9   3   2   40.10    4.90
   9   3   2   38.40    4.90
   9   3   2   41.70    4.60
   9   3   2   37.40    3.50
   9   3   2   40.30    5.00
  10   3   2   -0.20    1.40
  10   3   2    4.70    2.50
  10   3   2   -3.30    2.30
  10   3   2    0.10    2.20
  10   3   2    0.60    2.50
  11   3   2  166.98   10.20
  11   3   2  159.88   10.50
  11   3   2  161.48    9.70
  11   3   2  180.18    7.80
  11   3   2  170.68   10.50
  12   3   2   69.89    6.90
  12   3   2   74.09    7.10
  12   3   2   60.99    7.20
  12   3   2   71.79    7.50
  13   3   2  107.19    9.00
  13   3   2  122.89    8.90
  13   3   2  131.19    9.10
  13   3   2  111.39    9.20
  14   3   2   60.89    8.00
  14   3   2   74.79    8.90
  14   3   2   69.09    7.60
  14   3   2   67.29    7.50
  15   3   2  130.59   12.20
  15   3   2  126.49   11.00
  15   3   2  120.39    9.50
  15   3   2  114.39   10.00
  16   3   2  109.99   10.40
  16   3   2   94.49   10.90
  16   3   2  111.39   11.80
  16   3   2   90.99    9.10
  17  -4  -2    5.50    5.50
  17  -4  -2    6.50    4.10
  17  -4  -2   -1.90    3.90
  16  -4  -2   20.60    5.50
  16  -4  -2   27.40    6.30
  16  -4  -2   20.20    4.90
  15  -4  -2    9.00    3.80
  15  -4  -2   12.10    4.60
  15  -4  -2   10.90    5.10
  14  -4  -2  202.88   13.10
  14  -4  -2  198.48   12.50
  14  -4  -2  213.28   11.50
  13  -4  -2  184.28   10.50
  13  -4  -2  202.08   12.40
  13  -4  -2  208.08   12.10
  12  -4  -2  415.66   18.40
  12  -4  -2  390.26   17.00
  12  -4  -2  420.96   19.00
  11  -4  -2    1.20    2.90
  11  -4  -2    4.90    2.70
  11  -4  -2    1.60    2.20
   9  -4  -2    2.90    1.80
   9  -4  -2    0.70    2.30
   9  -4  -2    0.40    1.90
   9  -4  -2    0.60    2.00
   8  -4  -2  117.09    6.70
   8  -4  -2  107.19    7.20
   8  -4  -2  107.59    5.90
   8  -4  -2  115.49    6.90
   7  -4  -2  122.59    6.10
   7  -4  -2  124.69    6.70
   7  -4  -2  141.59    7.30
   7  -4  -2  127.59    7.40
  -7   4   2  125.69    4.70
   6  -4  -2  189.88    7.60
   6  -4  -2  194.48    9.00
   6  -4  -2  182.48    8.10
   6  -4  -2  182.18    8.50
  -6   4   2  176.58    6.70
   5  -4  -2   38.80    3.60
   4  -4  -2 1169.38   38.10
   4  -4  -2 1145.19   39.20
   4  -4  -2 1186.18   39.10
   4  -4  -2 1146.69   38.20
   4  -4  -2 1168.98   38.40
   4  -4  -2 1182.08   39.30
  -4   4   2 1138.89   38.10
   3  -4  -2  255.37   10.40
   3  -4  -2  262.67    9.40
   3  -4  -2  265.47    9.90
   3  -4  -2  268.37   10.30
   3  -4  -2  254.17   10.10
  -3   4   2  271.97    9.70
   2  -4  -2    8.30    1.20
   2  -4  -2    7.30    1.90
   2  -4  -2    6.10    1.60
   2  -4  -2    7.20    1.10
   2  -4  -2    7.80    1.00
   2  -4  -2    7.10    1.80
  -2   4   2    7.90    1.50
   1  -4  -2 1595.74   50.89
   1  -4  -2 1553.74   50.49
   1  -4  -2 1592.84   50.39
   1  -4  -2 1347.57   51.09
   1  -4  -2 1552.64   50.49
  -1   4   2 1535.55   49.60
  -1   4   2 1648.64   50.59
  -1   4   2 1570.54   50.69
   0  -4  -2   97.79    4.80
   0  -4  -2  100.39    4.60
   0  -4  -2  103.09    4.80
   0  -4  -2  109.59    5.60
   0   4   2  102.79    4.80
   0   4   2  100.59    4.60
  -1  -4  -2   52.29    3.50
  -1  -4  -2   49.00    2.80
   1   4   2   50.89    3.40
   1   4   2   50.49    3.30
   1   4   2   46.50    2.40
   1   4   2   51.99    3.30
  -2  -4  -2  742.83   26.00
  -2  -4  -2  792.52   27.10
  -2  -4  -2  763.52   24.90
   2   4   2  759.82   26.00
   2   4   2  732.33   25.20
   2   4   2  712.83   25.90
   2   4   2  755.12   25.80
   2   4   2  797.02   26.90
  -3  -4  -2  248.48    8.60
  -3  -4  -2  252.87   10.10
  -3  -4  -2  277.07   11.30
   3   4   2  238.88   10.10
   3   4   2  241.08   10.00
   3   4   2  231.48    9.50
   3   4   2  265.97   11.00
   3   4   2  241.68    9.80
  -4  -4  -2  439.96   15.60
   4   4   2  415.06   15.20
   4   4   2  445.06   16.60
   4   4   2  402.96   15.20
   4   4   2  381.36   15.60
   4   4   2  394.96   15.10
   4   4   2  422.06   15.50
  -5  -4  -2    1.40    1.40
   5   4   2    3.00    1.60
   5   4   2    3.10    2.00
   5   4   2    2.10    1.50
   5   4   2    2.60    1.50
   5   4   2   -0.30    1.20
   5   4   2    3.40    1.30
   5   4   2    3.10    1.80
  -6  -4  -2  370.96   14.60
   6   4   2  401.66   15.90
   6   4   2  382.26   14.30
   6   4   2  366.86   14.10
   6   4   2  377.56   14.10
   6   4   2  370.96   14.10
   6   4   2  361.26   15.20
   6   4   2  360.36   14.70
  -7  -4  -2   17.30    2.70
   7   4   2   21.20    2.80
   7   4   2   23.80    2.70
   7   4   2   23.30    3.70
   7   4   2   16.10    3.10
   7   4   2   26.50    2.90
   7   4   2   25.60    3.10
   7   4   2   22.10    3.40
  -8  -4  -2   70.39    5.30
   8   4   2   71.69    4.30
   8   4   2   71.19    6.00
   8   4   2   61.39    4.80
   8   4   2   66.19    5.90
   8   4   2   64.49    4.40
   8   4   2   68.89    4.40
   8   4   2   70.89    5.50
   9   4   2   60.89    5.10
   9   4   2   53.09    3.80
   9   4   2   57.49    5.90
   9   4   2   53.09    4.10
   9   4   2   55.49    6.00
   9   4   2   51.49    5.80
   9   4   2   56.69    4.10
  10   4   2  933.91   33.80
  10   4   2  887.21   30.90
  10   4   2  884.11   33.20
  10   4   2  844.72   33.50
  10   4   2  879.81   32.30
  11   4   2   -1.20    3.10
  11   4   2   -3.20    2.20
  11   4   2    2.60    1.70
  11   4   2    1.00    2.60
  11   4   2   -0.50    2.20
  12   4   2   87.39    7.80
  12   4   2   90.69    7.20
  12   4   2   73.39    8.20
  12   4   2   96.29    8.30
  13   4   2  308.87   16.00
  13   4   2  298.67   15.30
  13   4   2  288.57   15.80
  13   4   2  283.67   14.50
  14   4   2    1.30    3.90
  14   4   2   14.90    4.10
  14   4   2   14.90    4.70
  14   4   2    7.00    3.60
  15   4   2   71.99    8.10
  15   4   2   76.09    8.10
  15   4   2   87.29    9.90
  15   4   2   70.39    8.90
  16   4   2   64.69    9.30
  16   4   2   62.49    8.00
  16   4   2   73.89    8.40
  16   4   2   64.79    9.70
  17  -5  -2   15.30    4.80
  17  -5  -2   22.20    6.30
  17  -5  -2   12.40    6.50
  16  -5  -2   14.70    5.10
  16  -5  -2   17.40    5.70
  16  -5  -2   13.60    4.10
  15  -5  -2  187.18   13.10
  15  -5  -2  181.48   12.30
  15  -5  -2  188.18   11.10
  14  -5  -2   50.39    7.30
  14  -5  -2   52.59    6.80
  14  -5  -2   71.39    6.70
  13  -5  -2  137.49   10.60
  13  -5  -2  149.19   10.20
  13  -5  -2  159.18    9.10
  12  -5  -2   72.69    7.50
  12  -5  -2   67.99    7.60
  12  -5  -2   66.09    6.00
  11  -5  -2  419.26   18.50
  11  -5  -2  415.26   17.50
  11  -5  -2  376.66   16.10
  10  -5  -2  116.19    7.50
  10  -5  -2  125.99    6.80
  10  -5  -2  111.69    8.20
   9  -5  -2  259.77   12.00
   9  -5  -2  254.57   12.80
   9  -5  -2  277.27   12.60
   9  -5  -2  269.97   11.10
   8  -5  -2   19.30    3.50
   8  -5  -2   29.90    3.00
   8  -5  -2   29.80    3.70
   8  -5  -2   32.10    4.00
  -8   5   2   29.40    1.90
   7  -5  -2 1385.86   46.90
   7  -5  -2 1364.56   46.00
   7  -5  -2 1375.56   47.90
   7  -5  -2 1403.46   47.50
  -7   5   2 1405.06   45.20
   6  -5  -2  141.29    6.80
   6  -5  -2  154.38    7.60
   6  -5  -2  151.68    7.90
   6  -5  -2  154.28    6.30
  -6   5   2  142.49    6.00
   5  -5  -2  195.58    7.50
   5  -5  -2  190.78    7.80
   5  -5  -2  178.28    8.80
   5  -5  -2  193.58    8.00
   5  -5  -2  188.08    8.60
  -5   5   2  209.68    7.60
   4  -5  -2  137.59    6.30
   4  -5  -2  136.89    6.80
   4  -5  -2  147.69    6.00
   4  -5  -2  136.29    6.60
  -4   5   2  142.89    6.00
   3  -5  -2  272.47   10.50
   3  -5  -2  270.27    9.50
   3  -5  -2  263.77   10.70
   3  -5  -2  269.47   10.60
  -3   5   2  270.67   10.10
   2  -5  -2 1681.73   54.29
   2  -5  -2 1598.84   53.19
   2  -5  -2 1620.34   52.59
   2  -5  -2 1590.34   54.39
   2  -5  -2 1684.83   53.89
   2  -5  -2 1669.93   53.19
  -2   5   2 1630.54   53.79
   1  -5  -2 1267.97   43.00
   1  -5  -2 1353.76   43.00
   1  -5  -2 1346.07   43.40
   1  -5  -2 1170.68   43.80
   1  -5  -2 1269.97   42.90
  -1   5   2 1413.66   43.30
  -1   5   2 1320.67   43.30
   0  -5  -2 1011.00   33.00
   0  -5  -2 1019.70   34.30
   0  -5  -2  906.11   33.10
   0  -5  -2  952.20   33.10
   0   5   2  988.60   33.30
   0   5   2 1006.20   32.90
   0   5   2 1011.40   31.80
   0   5   2 1007.80   33.20
  -1  -5  -2  531.75   17.90
  -1  -5  -2  474.95   19.40
  -1  -5  -2  537.55   18.60
   1   5   2  530.55   17.30
   1   5   2  509.35   18.40
   1   5   2  538.25   18.30
   1   5   2  517.05   18.50
  -2  -5  -2   39.30    2.50
  -2  -5  -2   27.10    2.90
  -2  -5  -2   42.60    4.20
   2   5   2   38.50    4.00
   2   5   2   43.30    3.30
   2   5   2   40.60    3.40
   2   5   2   40.20    2.50
   2   5   2   37.80    3.20
  -3  -5  -2  616.94   22.90
   3   5   2  595.84   20.80
   3   5   2  625.34   21.70
   3   5   2  622.14   22.80
   3   5   2  588.74   21.30
   3   5   2  575.24   21.60
  -4  -5  -2   49.60    5.00
  -4  -5  -2   48.60    4.20
   4   5   2   56.49    4.90
   4   5   2   50.89    4.30
   4   5   2   54.29    3.80
   4   5   2   55.99    3.70
   4   5   2   58.09    4.20
  -5  -5  -2  294.57   11.40
   5   5   2  256.07   10.20
   5   5   2  244.08   11.30
   5   5   2  257.57   10.70
   5   5   2  262.17   10.80
   5   5   2  265.27   10.80
   5   5   2  270.77   11.10
   5   5   2  261.57   12.20
  -6  -5  -2    3.70    1.90
   6   5   2    8.60    2.70
   6   5   2    6.30    1.90
   6   5   2    2.10    2.30
   6   5   2    5.70    1.60
   6   5   2   10.00    2.10
   6   5   2    6.00    2.10
   6   5   2    5.90    1.60
  -7  -5  -2    1.40    1.80
   7   5   2    2.90    2.30
   7   5   2   -1.60    1.30
   7   5   2    2.10    1.90
   7   5   2    1.10    1.50
   7   5   2   -1.60    2.00
   7   5   2   -0.90    1.10
   7   5   2    0.20    1.40
  -8  -5  -2   16.70    2.90
   8   5   2   16.30    2.80
   8   5   2   15.40    3.10
   8   5   2   20.80    2.90
   8   5   2   17.60    3.50
   8   5   2   14.80    3.50
   8   5   2   22.10    2.80
   8   5   2   21.70    3.10
   9   5   2    6.80    2.10
   9   5   2    2.70    2.00
   9   5   2    8.40    3.00
   9   5   2    6.50    1.80
   9   5   2    6.30    2.00
   9   5   2    4.70    2.60
   9   5   2    0.30    2.30
  10   5   2  356.06   16.40
  10   5   2  365.26   17.20
  10   5   2  382.36   14.80
  10   5   2  375.66   15.60
  10   5   2  369.96   17.20
  10   5   2  372.16   14.20
  10   5   2  358.96   13.90
  11   5   2   22.60    4.50
  11   5   2   24.10    5.10
  11   5   2   25.20    3.40
  11   5   2   26.20    4.10
  11   5   2   27.60    4.80
  12   5   2   13.20    4.40
  12   5   2   14.40    2.90
  12   5   2   16.60    4.60
  12   5   2   13.50    3.50
  12   5   2   20.80    4.70
  13   5   2  121.39   10.20
  13   5   2  125.89    8.70
  13   5   2  117.99    9.70
  13   5   2  113.59    9.60
  14   5   2   64.89    8.70
  14   5   2   61.39    7.80
  14   5   2   64.09    7.00
  14   5   2   50.59    7.10
  15   5   2   36.30    6.40
  15   5   2   32.30    6.80
  15   5   2   39.60    5.90
  15   5   2   38.20    7.20
  16   5   2   15.40    5.10
  16   5   2    8.00    5.80
  16   5   2   11.70    6.70
  17  -6  -2   25.10    7.30
  17  -6  -2   23.50    6.50
  16  -6  -2   -2.10    4.60
  16  -6  -2   -2.10    4.90
  16  -6  -2    1.50    4.00
  15  -6  -2   50.89    7.00
  15  -6  -2   51.09    6.00
  15  -6  -2   43.30    7.50
  14  -6  -2  439.66   20.60
  14  -6  -2  455.25   19.00
  14  -6  -2  456.65   21.80
  13  -6  -2   22.20    3.80
  13  -6  -2   12.10    4.90
  13  -6  -2   18.20    4.50
  12  -6  -2   53.89    5.20
  12  -6  -2   55.29    6.20
  12  -6  -2   60.99    7.10
  11  -6  -2  127.69    7.20
  11  -6  -2  117.19    9.10
  11  -6  -2  141.19    8.60
   9  -6  -2   32.40    4.30
   9  -6  -2   32.40    4.10
   9  -6  -2   32.60    4.60
   9  -6  -2   34.20    3.50
   8  -6  -2  360.16   13.90
   8  -6  -2  388.96   15.10
   8  -6  -2  384.36   16.20
   8  -6  -2  366.16   15.60
  -8   6   2  373.86   13.10
   7  -6  -2    3.60    1.40
   7  -6  -2    8.00    2.70
   7  -6  -2    1.20    1.60
   7  -6  -2    5.10    2.20
  -7   6   2    2.50    1.10
   6  -6  -2 1788.32   58.39
   6  -6  -2 1787.52   60.59
   6  -6  -2 1767.22   59.19
   6  -6  -2 1829.22   60.19
   6  -6  -2 1808.82   58.99
  -6   6   2 1784.62   58.59
   5  -6  -2   66.39    5.00
   5  -6  -2   76.69    4.50
   5  -6  -2   72.49    4.10
   5  -6  -2   63.19    4.70
   4  -6  -2 1377.06   45.50
   4  -6  -2 1327.77   44.40
   4  -6  -2 1356.96   45.50
   4  -6  -2 1341.57   45.70
  -4   6   2 1372.76   44.90
   3  -6  -2  397.26   13.20
   3  -6  -2  386.16   14.40
   3  -6  -2  386.76   13.20
   3  -6  -2  392.56   14.60
   3  -6  -2  375.66   14.80
  -3   6   2  378.66   14.20
   2  -6  -2  180.68    7.10
   2  -6  -2  173.28    8.30
   2  -6  -2  185.08    7.20
   2  -6  -2  169.08    7.50
  -2   6   2  179.38    7.50
  -2   6   2  175.48    7.60
   1  -6  -2  967.10   32.10
   1  -6  -2  922.81   32.20
   1  -6  -2  978.30   33.50
   1  -6  -2  920.11   31.90
  -1   6   2  970.00   32.50
  -1   6   2  908.01   32.20
  -1   6   2 1017.00   31.70
   0  -6  -2  262.37   11.60
   0  -6  -2  258.07   10.40
   0  -6  -2  253.07   10.40
   0   6   2  248.58   10.40
   0   6   2  285.57   10.00
   0   6   2  266.07   10.60
  -1  -6  -2  278.87   11.00
  -1  -6  -2  297.47   12.20
   1   6   2  252.47   10.70
   1   6   2  262.27   10.40
   1   6   2  263.37    9.30
   1   6   2  265.97   10.90
  -2  -6  -2 1388.46   42.30
  -2  -6  -2 1162.78   43.10
   2   6   2 1294.67   40.70
   2   6   2 1214.88   41.70
   2   6   2 1191.48   41.80
   2   6   2 1186.88   41.90
  -3  -6  -2   95.29    6.50
   3   6   2   90.79    5.20
   3   6   2   78.89    6.00
   3   6   2   85.39    4.40
   3   6   2   87.39    5.30
   3   6   2   97.39    5.60
  -4  -6  -2  849.12   35.30
   4   6   2 1060.39   35.90
   4   6   2 1006.70   33.50
   4   6   2 1006.50   34.50
   4   6   2 1029.30   34.40
   4   6   2  977.10   34.00
  -5  -6  -2   20.40    3.30
   5   6   2   15.70    2.00
   5   6   2   16.40    3.10
   5   6   2   14.10    2.50
   5   6   2   12.90    2.10
   5   6   2   15.90    2.70
   5   6   2   16.50    2.40
   5   6   2   20.00    3.70
  -6  -6  -2   23.70    3.70
   6   6   2   18.70    2.70
   6   6   2   23.50    4.30
   6   6   2   22.40    3.00
   6   6   2   21.70    2.90
   6   6   2   22.60    3.60
   6   6   2   10.60    2.60
   6   6   2   22.20    2.50
  -7  -6  -2   35.50    3.90
   7   6   2   42.10    3.80
   7   6   2   39.90    4.00
   7   6   2   36.70    4.10
   7   6   2   45.60    5.20
   7   6   2   47.90    5.60
   7   6   2   41.60    4.20
   7   6   2   44.60    3.60
  -8  -6  -2  106.39    7.20
   8   6   2  114.99    8.00
   8   6   2  107.09    6.60
   8   6   2  108.69    6.10
   8   6   2  103.69    6.90
   8   6   2  106.99    6.10
   8   6   2  116.79    8.20
   8   6   2  113.09    6.50
   9   6   2   67.49    6.70
   9   6   2   67.89    5.10
   9   6   2   67.49    4.80
   9   6   2   55.99    5.80
   9   6   2   61.19    5.00
   9   6   2   68.19    5.30
   9   6   2   69.69    7.30
  10   6   2  633.04   23.70
  10   6   2  621.04   25.90
  10   6   2  601.24   25.90
  10   6   2  631.64   25.00
  10   6   2  647.84   23.60
  10   6   2  643.14   22.70
  10   6   2  623.34   22.90
  11   6   2   68.59    5.30
  11   6   2   84.39    8.00
  11   6   2   73.99    4.90
  11   6   2   77.69    8.20
  11   6   2   67.19    5.80
  11   6   2   72.39    4.70
  11   6   2   73.99    7.70
  12   6   2   -1.90    3.10
  12   6   2    2.60    2.10
  12   6   2    3.40    3.50
  12   6   2    0.10    2.70
  12   6   2    1.30    2.40
  13   6   2  211.08   13.00
  13   6   2  188.48   11.90
  13   6   2  170.18   12.00
  13   6   2  198.88   10.90
  14   6   2   -0.40    3.00
  14   6   2   -2.00    2.70
  14   6   2    5.30    4.00
  14   6   2   -2.70    3.70
  15   6   2   10.90    5.40
  15   6   2   10.20    5.80
  17  -7  -2   18.40    6.20
  17  -7  -2    8.30    6.40
  16  -7  -2   -2.80    4.30
  16  -7  -2   -4.90    3.80
  15  -7  -2   25.90    5.30
  15  -7  -2   22.40    6.10
  14  -7  -2    7.40    4.50
  14  -7  -2    9.10    4.10
  14  -7  -2   12.40    3.50
  13  -7  -2  110.69    7.30
  13  -7  -2  118.69   10.00
  13  -7  -2  116.69    9.00
  12  -7  -2    3.70    3.60
  12  -7  -2   11.50    2.80
  12  -7  -2    5.70    3.30
  11  -7  -2   16.80    3.00
  11  -7  -2   17.00    3.90
  11  -7  -2   17.80    4.30
  10  -7  -2   48.20    5.50
   9  -7  -2  574.24   23.10
   9  -7  -2  613.04   24.00
   9  -7  -2  600.44   22.50
   9  -7  -2  594.34   21.00
  -9   7   2  578.04   20.20
   8  -7  -2  430.06   16.40
   8  -7  -2  389.86   16.90
   8  -7  -2  427.16   17.80
   8  -7  -2  414.56   15.10
  -8   7   2  415.26   14.90
   7  -7  -2  782.12   28.20
   7  -7  -2  795.32   27.30
   7  -7  -2  790.72   28.80
   7  -7  -2  759.32   26.10
   7  -7  -2  773.92   26.80
  -7   7   2  740.63   26.30
   6  -7  -2  137.99    6.80
   6  -7  -2  124.89    7.60
   6  -7  -2  130.79    7.20
   6  -7  -2  140.59    6.50
  -6   7   2  142.49    6.40
   5  -7  -2  425.86   16.40
   5  -7  -2  408.36   14.90
   5  -7  -2  412.26   16.00
   5  -7  -2  421.16   15.90
  -5   7   2  400.46   15.10
   4  -7  -2   84.49    5.10
   4  -7  -2   83.49    4.10
   4  -7  -2   89.29    5.50
   4  -7  -2  100.69    5.70
  -4   7   2   88.99    5.00
   3  -7  -2  961.10   32.20
   3  -7  -2  973.30   33.30
   3  -7  -2  988.00   32.10
   3  -7  -2 1007.40   34.10
   3  -7  -2  948.81   31.60
   3  -7  -2  948.21   33.10
  -3   7   2  966.90   33.10
   2  -7  -2   64.09    5.10
   2  -7  -2   61.69    3.70
   2  -7  -2   66.59    4.00
   2  -7  -2   55.79    3.90
  -2   7   2   66.49    4.30
  -2   7   2   64.09    4.20
  -2   7   2   65.99    3.20
   1  -7  -2  252.67   11.00
   1  -7  -2  218.58    9.40
   1  -7  -2  238.08    9.70
   1  -7  -2  226.58    9.10
  -1   7   2  227.18    9.70
  -1   7   2  219.78    9.70
  -1   7   2  250.77    8.90
   0  -7  -2    3.10    1.60
   0  -7  -2    0.50    1.50
   0  -7  -2    3.90    1.40
   0   7   2    1.60    1.70
   0   7   2    2.70    1.30
   0   7   2    2.50    1.50
  -1  -7  -2  341.17   15.30
  -1  -7  -2  372.76   14.20
   1   7   2  349.27   12.20
   1   7   2  377.76   14.30
   1   7   2  370.96   13.60
   1   7   2  364.26   14.10
  -2  -7  -2  145.89    8.90
  -2  -7  -2  178.88    8.10
   2   7   2  163.78    7.60
   2   7   2  156.88    7.70
   2   7   2  167.98    6.30
   2   7   2  149.88    7.80
  -3  -7  -2  471.55   17.60
  -3  -7  -2  384.06   18.40
   3   7   2  474.95   18.80
   3   7   2  473.15   17.60
   3   7   2  460.75   17.30
   3   7   2  469.35   16.10
   3   7   2  442.16   17.20
  -4  -7  -2   10.20    2.60
  -4  -7  -2   18.70    3.90
   4   7   2   20.30    4.00
   4   7   2   11.60    2.40
   4   7   2   16.70    3.00
   4   7   2   15.90    2.20
   4   7   2   12.00    2.60
  -5  -7  -2  138.99    9.40
  -5  -7  -2  175.18    8.60
   5   7   2  162.28    6.60
   5   7   2  169.18    8.30
   5   7   2  145.49    9.10
   5   7   2  150.78    7.70
   5   7   2  152.18    8.40
   5   7   2  168.18    7.50
   5   7   2  166.08    8.10
  -6  -7  -2    3.60    2.40
   6   7   2    1.90    2.30
   6   7   2    3.40    1.90
   6   7   2    3.80    2.70
   6   7   2    1.30    1.20
   6   7   2    2.40    1.90
   6   7   2    0.50    1.70
   6   7   2    2.40    1.50
  -7  -7  -2   62.19    5.80
   7   7   2   78.09    5.60
   7   7   2   71.99    5.60
   7   7   2   78.59    5.80
   7   7   2   69.79    6.60
   7   7   2   89.49    6.80
   7   7   2   80.29    5.30
   7   7   2   71.29    4.50
  -8  -7  -2    4.70    2.70
   8   7   2    0.40    2.00
   8   7   2   -0.20    2.60
   8   7   2    0.30    1.50
   8   7   2   -1.70    1.80
   8   7   2    1.10    1.60
   8   7   2   -2.30    1.90
   8   7   2    0.00    2.10
   9   7   2  297.17   12.50
   9   7   2  307.27   14.00
   9   7   2  301.87   12.70
   9   7   2  310.47   13.20
   9   7   2  293.17   15.00
   9   7   2  288.17   15.20
   9   7   2  298.07   13.10
  10   7   2   49.50    4.80
  10   7   2   47.70    5.10
  10   7   2   43.20    6.40
  10   7   2   43.10    4.60
  10   7   2   61.09    4.80
  10   7   2   43.60    6.40
  10   7   2   43.80    5.50
  11   7   2  103.89    8.10
  11   7   2  104.19    6.90
  11   7   2  113.49    9.40
  11   7   2  103.09    6.10
  11   7   2  104.39    6.40
  11   7   2  102.09   12.00
  11   7   2  118.49    7.10
  12   7   2   50.89    6.50
  12   7   2   44.90    5.50
  12   7   2   29.50    6.00
  12   7   2   56.59    5.40
  13   7   2  120.19    9.70
  13   7   2   96.39   10.00
  14   7   2   -2.40    3.50
  14   7   2   -0.60    4.40
  15   7   2  144.29   11.80
  15   7   2  120.59   12.50
  16  -8  -2   97.69   10.20
  16  -8  -2  102.89   11.80
  15  -8  -2    5.80    4.80
  15  -8  -2    4.80    3.80
  14  -8  -2  119.09   11.40
  14  -8  -2  115.19    9.20
  13  -8  -2    3.50    3.70
  13  -8  -2   -0.30    3.20
  12  -8  -2  364.16   18.30
  12  -8  -2  369.86   16.90
  11  -8  -2   21.70    4.30
  11  -8  -2   16.70    2.80
  11  -8  -2   18.60    4.70
  10  -8  -2  228.48   12.00
  10  -8  -2  227.98   11.00
  10  -8  -2  211.68    9.30
  10  -8  -2  220.68   12.40
   9  -8  -2    2.70    2.50
   9  -8  -2    3.70    1.40
   9  -8  -2    1.70    2.00
   9  -8  -2    2.80    2.60
  -9   8   2    0.40    1.30
   8  -8  -2  350.16   14.00
   8  -8  -2  372.66   14.10
   8  -8  -2  367.66   15.70
   8  -8  -2  341.77   16.10
   8  -8  -2  386.66   14.90
  -8   8   2  372.86   13.70
   7  -8  -2  101.99    7.00
   7  -8  -2   95.39    5.60
   7  -8  -2   96.79    5.80
   7  -8  -2   87.09    6.30
  -7   8   2   96.99    5.20
   6  -8  -2  158.18    8.30
   6  -8  -2  169.58    7.40
   6  -8  -2  162.28    8.10
   6  -8  -2  159.28    8.70
  -6   8   2  157.28    7.40
   5  -8  -2   11.50    1.80
   5  -8  -2    5.30    2.10
   5  -8  -2    5.20    2.30
   5  -8  -2   12.20    2.50
   4  -8  -2   38.00    4.00
   4  -8  -2   34.20    4.20
   4  -8  -2   37.60    3.80
   4  -8  -2   34.00    2.30
  -4   8   2   35.10    3.50
   3  -8  -2   86.99    5.00
   3  -8  -2   81.29    4.20
   3  -8  -2   73.69    4.90
   3  -8  -2   83.59    6.00
   3  -8  -2   81.79    4.30
  -3   8   2   78.09    4.90
  -3   8   2   82.29    3.60
   2  -8  -2  395.56   14.40
   2  -8  -2  367.86   14.10
   2  -8  -2  361.36   14.30
   2  -8  -2  378.06   15.90
  -2   8   2  396.76   14.70
  -2   8   2  374.36   14.80
  -2   8   2  392.26   13.40
   1  -8  -2   73.89    5.90
   1  -8  -2   79.49    4.30
   1  -8  -2   68.89    4.70
   1  -8  -2   75.99    4.60
  -1   8   2   75.19    3.90
  -1   8   2   76.09    5.00
  -1   8   2   76.09    4.90
   0  -8  -2   13.80    2.60
   0  -8  -2   24.10    3.20
   0  -8  -2   22.90    3.00
   0   8   2   20.60    2.90
   0   8   2   13.50    2.60
   0   8   2   17.90    2.20
  -1  -8  -2  103.29    7.30
  -1  -8  -2  101.69    6.10
   1   8   2  102.09    4.00
   1   8   2  110.79    5.60
   1   8   2  120.69    6.40
   1   8   2  100.39    6.00
  -2  -8  -2  574.44   20.90
   2   8   2  547.65   18.60
   2   8   2  525.55   20.60
   2   8   2  569.74   20.70
   2   8   2  531.65   20.00
  -3  -8  -2  155.28    8.20
  -3  -8  -2  138.49    9.30
   3   8   2  166.88    6.60
   3   8   2  153.08    7.70
   3   8   2  164.18    8.30
   3   8   2  146.19    7.80
  -4  -8  -2   40.90    4.10
   4   8   2   45.20    4.40
   4   8   2   69.69    7.40
   4   8   2   44.10    4.40
   4   8   2   50.99    3.50
   4   8   2   44.10    4.50
  -5  -8  -2    2.00    2.30
  -5  -8  -2    1.70    2.10
   5   8   2    3.30    2.00
   5   8   2    1.10    1.00
   5   8   2    1.20    2.00
   5   8   2    0.90    2.00
   5   8   2    1.40    1.60
   5   8   2    1.10    1.80
  -6  -8  -2   17.30    3.50
   6   8   2   17.80    3.50
   6   8   2   13.00    1.80
   6   8   2   16.00    3.10
   6   8   2   10.20    2.70
   6   8   2   18.50    2.90
   6   8   2   14.00    3.30
  -7  -8  -2    0.90    2.20
   7   8   2   -0.90    1.80
   7   8   2    0.10    1.30
   7   8   2   -2.70    1.90
   7   8   2    5.00    2.40
   7   8   2    3.20    2.80
   7   8   2    1.10    2.20
   8   8   2  105.89    8.20
   8   8   2  110.79    7.10
   8   8   2   96.99    8.50
   8   8   2  103.99    7.20
   8   8   2  109.49    5.70
   8   8   2  103.99    7.00
   9   8   2   72.79    7.50
   9   8   2   67.19    6.20
   9   8   2   54.49    5.60
   9   8   2   72.39    6.00
   9   8   2   63.29    4.70
  10   8   2  172.68   10.10
  10   8   2  164.38    9.10
  10   8   2  175.48   11.40
  10   8   2  164.68    9.30
  11   8   2   71.99    7.40
  11   8   2   78.29    6.50
  11   8   2   74.69    6.00
  11   8   2   80.89    8.60
  12   8   2   70.49    7.80
  12   8   2   80.19    8.90
  12   8   2   69.89    5.40
  12   8   2   77.49    6.90
  13   8   2    8.20    4.10
  13   8   2    5.40    4.70
  14   8   2   57.39    7.90
  14   8   2   68.49    9.60
  16  -9  -2   13.30    5.50
  16  -9  -2   14.50    6.70
  15  -9  -2  178.48   14.00
  15  -9  -2  180.58   12.10
  14  -9  -2   -0.10    3.30
  14  -9  -2   -0.60    3.80
  13  -9  -2   20.30    4.70
  13  -9  -2   28.20    6.10
  12  -9  -2    5.30    3.20
  12  -9  -2    3.30    3.70
  11  -9  -2  292.87   14.80
  11  -9  -2  278.07   15.40
  11  -9  -2  303.57   13.90
  10  -9  -2    4.00    3.50
  10  -9  -2   14.40    3.70
   9  -9  -2  268.47   13.60
   9  -9  -2  264.67   11.10
   9  -9  -2  279.97   13.20
   9  -9  -2  268.87   11.90
  -9   9   2  249.68   10.60
   8  -9  -2   10.70    3.40
   8  -9  -2    7.90    3.00
   8  -9  -2    5.70    2.40
   8  -9  -2    8.90    2.40
  -8   9   2    6.70    2.00
   7  -9  -2   17.60    3.60
   7  -9  -2   20.60    3.30
   7  -9  -2   22.30    2.90
   7  -9  -2   21.40    3.60
  -7   9   2   25.70    3.00
   6  -9  -2   35.70    3.00
   6  -9  -2   35.60    4.50
   6  -9  -2   28.00    3.80
   6  -9  -2   32.30    4.10
  -6   9   2   28.80    3.40
   5  -9  -2  731.53   27.20
   5  -9  -2  768.32   27.80
   5  -9  -2  762.82   25.60
   5  -9  -2  777.22   28.10
  -5   9   2  757.02   27.00
   4  -9  -2  280.37   12.50
   4  -9  -2  266.47   11.60
   4  -9  -2  262.77    9.40
   4  -9  -2  253.07   11.20
  -4   9   2  269.87    9.20
  -4   9   2  263.87   11.20
   3  -9  -2  133.79    6.70
   3  -9  -2  129.79    6.10
   3  -9  -2  129.99    6.00
   3  -9  -2  127.39    6.70
   3  -9  -2  129.29    7.90
  -3   9   2  128.99    5.10
  -3   9   2  123.99    6.80
  -3   9   2  124.39    6.80
   2  -9  -2    5.90    2.40
   2  -9  -2    6.60    1.80
   2  -9  -2    5.40    1.80
   2  -9  -2    7.80    1.90
  -2   9   2    5.80    1.30
  -2   9   2    6.30    2.20
  -2   9   2    5.80    1.90
   1  -9  -2  589.44   22.10
   1  -9  -2  595.74   21.40
   1  -9  -2  607.14   22.30
   1  -9  -2  641.84   24.20
  -1   9   2  622.74   22.60
  -1   9   2  629.64   21.20
  -1   9   2  600.94   22.60
   0  -9  -2    5.00    2.20
   0  -9  -2    1.10    1.90
   0  -9  -2    3.80    1.60
   0   9   2    8.00    1.70
   0   9   2    1.00    1.80
   0   9   2    8.70    2.30
  -1  -9  -2  339.87   14.10
  -1  -9  -2  323.47   15.50
   1   9   2  331.27   14.10
   1   9   2  351.66   14.30
   1   9   2  354.66   13.30
  -2  -9  -2  170.68   10.20
  -2  -9  -2  170.18    8.90
   2   9   2  179.48    8.90
   2   9   2  161.88    8.70
   2   9   2  172.18    8.20
   2   9   2  174.58    6.50
  -3  -9  -2  715.13   25.60
  -3  -9  -2  653.63   27.10
   3   9   2  652.03   24.60
   3   9   2  668.13   23.10
   3   9   2  694.43   25.30
   3   9   2  690.53   25.30
  -4  -9  -2   42.60    5.20
  -4  -9  -2   62.69    7.50
   4   9   2   48.00    5.10
   4   9   2   43.00    3.40
   4   9   2   32.90    4.30
   4   9   2   36.20    4.30
   4   9   2   36.30    5.10
  -5  -9  -2  316.77   14.30
   5   9   2  320.07   12.50
   5   9   2  322.27   13.80
   5   9   2  322.17   14.10
   5   9   2  298.87   11.00
   5   9   2  321.47   14.00
  -6  -9  -2   22.40    3.90
   6   9   2   22.00    3.90
   6   9   2   22.80    3.20
   6   9   2   21.60    3.90
   6   9   2   23.50    2.10
   6   9   2   24.10    3.80
  -7  -9  -2  315.57   15.10
   7   9   2  355.66   13.30
   7   9   2  324.87   15.30
   7   9   2  321.97   14.70
   7   9   2  334.97   13.90
   7   9   2  317.77   14.40
   8   9   2   38.00    5.60
   8   9   2   40.90    5.10
   8   9   2   44.20    5.10
   8   9   2   46.70    5.00
   9   9   2  261.67   14.30
   9   9   2  282.97   13.10
   9   9   2  263.27   12.90
   9   9   2  277.37   13.00
  10   9   2   31.80    4.90
  10   9   2   24.40    4.30
  10   9   2   21.20    4.10
  10   9   2   18.50    5.10
  11   9   2   40.10    5.20
  11   9   2   33.00    5.40
  11   9   2   45.50    6.90
  11   9   2   42.40    5.00
  12   9   2   16.90    3.30
  12   9   2   18.30    4.00
  12   9   2   18.50    5.50
  12   9   2   14.20    4.10
  13   9   2  147.59   10.80
  13   9   2  117.09   11.60
  14   9   2   37.00    7.00
  14   9   2   46.70    8.60
  15 -10  -2    3.70    5.70
  15 -10  -2    2.30    4.00
  14 -10  -2  347.17   19.20
  14 -10  -2  337.87   17.10
  13 -10  -2   44.30    6.00
  13 -10  -2   29.70    6.20
  12 -10  -2   69.59    8.20
  12 -10  -2   76.89    7.20
  11 -10  -2    6.00    3.00
  11 -10  -2    2.20    3.70
  11 -10  -2    6.40    3.40
  10 -10  -2  178.48   10.80
  10 -10  -2  180.88   11.50
  10 -10  -2  199.48    9.80
   9 -10  -2   36.80    4.20
   9 -10  -2   36.70    4.20
   9 -10  -2   30.60    3.80
   9 -10  -2   30.20    4.70
   9 -10  -2   32.60    5.20
  -9  10   2   33.70    3.60
   8 -10  -2  110.39    6.60
   8 -10  -2  121.09    8.00
   8 -10  -2  124.89    8.60
   8 -10  -2  129.69    7.40
  -8  10   2  127.39    6.80
   7 -10  -2  133.09    8.60
   7 -10  -2  122.79    7.80
   7 -10  -2  138.79    8.00
   7 -10  -2  128.69    6.50
  -7  10   2  137.59    7.20
   6 -10  -2  148.89    6.70
   6 -10  -2  145.29    8.60
   6 -10  -2  155.58    8.70
   6 -10  -2  152.18    8.30
  -6  10   2  152.78    7.80
   5 -10  -2  113.49    6.80
   5 -10  -2  107.19    7.40
   5 -10  -2  112.19    7.00
   5 -10  -2  117.69    5.00
  -5  10   2  110.99    6.60
   4 -10  -2  830.92   27.50
   4 -10  -2  823.72   29.00
   4 -10  -2  793.42   27.60
   4 -10  -2  811.72   30.50
   4 -10  -2  804.22   29.20
  -4  10   2  820.62   29.20
   3 -10  -2   18.00    2.80
   3 -10  -2   18.60    2.60
   3 -10  -2   13.10    2.50
   3 -10  -2   15.00    2.30
   3 -10  -2   13.50    3.10
  -3  10   2   15.80    3.00
  -3  10   2   14.10    2.80
  -3  10   2   16.10    1.60
   2 -10  -2  234.68   12.10
   2 -10  -2  233.58   10.00
   2 -10  -2  232.98    9.90
   2 -10  -2  239.48   10.30
  -2  10   2  233.68    8.80
  -2  10   2  238.38   10.90
  -2  10   2  228.18   10.70
   1 -10  -2  218.28   12.00
   1 -10  -2  217.68   10.10
   1 -10  -2  217.38   10.30
  -1  10   2  238.28   10.80
  -1  10   2  237.68    9.10
  -1  10   2  242.88   10.80
   0 -10  -2   13.70    2.50
   0 -10  -2   19.40    3.40
   0 -10  -2   26.20    4.80
   0  10   2   18.60    3.10
   0  10   2   20.90    3.30
   0  10   2   22.40    2.60
  -1 -10  -2    4.00    2.30
  -1 -10  -2    3.40    2.10
   1  10   2    2.90    2.00
   1  10   2    5.60    1.80
   1  10   2    2.50    2.10
  -2 -10  -2   41.20    4.70
   2  10   2   55.99    5.40
   2  10   2   49.60    4.20
   2  10   2   56.49    5.60
   2  10   2   53.99    2.70
  -3 -10  -2   98.09    6.90
  -3 -10  -2   81.29    7.70
   3  10   2   89.79    6.40
   3  10   2   85.29    6.40
   3  10   2   80.59    5.80
   3  10   2   85.49    4.20
  -4 -10  -2  272.87   14.60
  -4 -10  -2  262.77   12.70
   4  10   2  259.67   12.00
   4  10   2  256.47   12.20
   4  10   2  256.37   10.30
   4  10   2  267.27   12.50
  -5 -10  -2   25.50    4.00
   5  10   2   21.50    2.90
   5  10   2   24.50    3.90
   5  10   2   27.80    4.20
   5  10   2   22.20    4.00
  -6 -10  -2  659.23   26.30
   6  10   2  690.73   26.30
   6  10   2  631.34   25.50
   6  10   2  695.63   26.10
   6  10   2  674.23   24.30
  -7 -10  -2   80.39    7.90
   7  10   2   63.79    5.20
   7  10   2   53.59    5.70
   7  10   2   59.19    6.40
   7  10   2   53.19    6.50
   8  10   2   15.10    3.90
   8  10   2   13.10    3.10
   8  10   2   18.90    3.70
   8  10   2   11.70    4.00
   9  10   2  143.29    9.00
   9  10   2  147.09    9.30
   9  10   2  143.49   10.40
   9  10   2  142.59    8.70
  10  10   2   99.49    7.60
  10  10   2  114.19    8.10
  10  10   2   82.09    8.80
  10  10   2  104.89    8.00
  11  10   2   15.40    3.80
  11  10   2   15.70    4.10
  11  10   2   17.80    4.10
  11  10   2   14.50    5.20
  12  10   2   46.70    6.40
  12  10   2   33.20    6.80
  12  10   2   42.90    5.10
  12  10   2   43.60    5.90
  13  10   2   -4.20    4.60
  13  10   2   -3.60    3.40
  15 -11  -2   27.80    6.00
  15 -11  -2   39.70    8.50
  14 -11  -2   -2.60    3.30
  14 -11  -2   -2.90    4.50
  13 -11  -2  285.57   16.60
  13 -11  -2  260.57   13.80
  12 -11  -2   13.70    5.10
  12 -11  -2   12.50    3.70
  11 -11  -2  296.27   13.40
  11 -11  -2  274.17   15.40
  11 -11  -2  278.67   14.80
  10 -11  -2    5.30    3.00
  10 -11  -2    8.60    2.80
  10 -11  -2    4.30    2.30
  10 -11  -2   -2.40    2.90
  10 -11  -2    4.10    2.20
   9 -11  -2  145.09   10.00
   9 -11  -2  135.39    8.00
   9 -11  -2  135.99    7.50
   9 -11  -2  135.89    9.00
  -9  11   2  129.49    7.10
   8 -11  -2   80.99    6.30
   8 -11  -2   78.29    6.60
   8 -11  -2   73.79    5.10
   8 -11  -2   72.19    7.20
  -8  11   2   68.99    5.30
   7 -11  -2  126.89    8.20
   7 -11  -2  132.79    6.40
   7 -11  -2  144.79    8.30
   7 -11  -2  122.19    8.40
  -7  11   2  126.09    7.40
   6 -11  -2   50.59    3.30
   6 -11  -2   56.39    5.40
   6 -11  -2   57.19    5.80
   6 -11  -2   44.40    5.20
  -6  11   2   51.19    4.90
   5 -11  -2    8.00    1.80
   5 -11  -2    6.20    2.40
   5 -11  -2    8.10    3.10
   5 -11  -2    3.70    2.50
  -5  11   2    5.00    2.40
   4 -11  -2    4.40    1.60
   4 -11  -2    2.70    2.00
   4 -11  -2    6.00    3.00
   4 -11  -2    4.30    1.60
   4 -11  -2    5.20    2.30
  -4  11   2    5.80    2.40
   3 -11  -2   20.40    2.80
   3 -11  -2   21.70    3.20
   3 -11  -2   20.70    2.80
   3 -11  -2   19.00    3.80
   3 -11  -2   32.50    3.70
  -3  11   2   21.30    3.70
  -3  11   2   25.30    1.90
   2 -11  -2  106.89    6.30
   2 -11  -2  103.49    6.00
   2 -11  -2  106.19    8.20
   2 -11  -2  104.49    6.10
   2 -11  -2  103.49    5.90
  -2  11   2  106.99    4.80
  -2  11   2  100.19    6.80
  -2  11   2   99.19    6.70
   1 -11  -2  306.27   12.70
   1 -11  -2  292.87   14.50
   1 -11  -2  260.97   12.00
  -1  11   2  289.47   10.80
  -1  11   2  260.47   12.40
  -1  11   2  278.27   12.70
   0 -11  -2   24.70    3.60
   0 -11  -2   36.10    4.80
   0 -11  -2   33.80    5.50
   0  11   2   39.30    3.50
   0  11   2   38.30    4.80
   0  11   2   28.60    3.90
  -1 -11  -2   55.89    5.50
  -1 -11  -2   56.89    7.10
   1  11   2   58.49    5.50
   1  11   2   51.99    5.30
   1  11   2   60.69    4.40
  -2 -11  -2  100.79    8.50
  -2 -11  -2   91.49    7.20
   2  11   2  101.59    7.20
   2  11   2  112.29    6.30
   2  11   2  101.99    7.00
  -3 -11  -2  172.28    9.70
  -3 -11  -2  183.78   11.60
   3  11   2  148.99    9.20
   3  11   2  162.78    6.70
   3  11   2  161.28    8.50
   3  11   2  163.18    9.30
  -4 -11  -2  739.23   28.40
   4  11   2  773.32   28.40
   4  11   2  758.02   27.70
   4  11   2  741.23   25.40
   4  11   2  676.83   27.70
  -5 -11  -2   30.20    5.30
   5  11   2   18.20    2.70
   5  11   2   19.60    4.10
   5  11   2   25.30    4.20
   5  11   2   21.10    3.90
  -6 -11  -2  357.46   16.70
   6  11   2  359.56   16.40
   6  11   2  366.16   16.20
   6  11   2  352.96   14.20
   6  11   2  355.46   16.30
  -7 -11  -2  104.79    8.60
   7  11   2  110.99    8.30
   7  11   2   98.59    8.40
   7  11   2  100.29    6.60
   7  11   2  112.79    7.90
   8  11   2    4.00    3.20
   8  11   2   -4.20    2.50
   8  11   2   -1.80    2.50
   8  11   2   -0.40    2.00
   9  11   2  175.48   11.40
   9  11   2  159.88    9.40
   9  11   2  176.78   10.50
   9  11   2  165.98   10.20
  10  11   2   34.50    5.00
  10  11   2   35.50    6.50
  10  11   2   30.10    5.20
  10  11   2   30.00    5.10
  11  11   2   27.00    6.20
  11  11   2   22.60    4.50
  11  11   2   25.40    5.00
  11  11   2   26.60    5.10
  12  11   2    6.00    3.80
  12  11   2   -1.00    3.20
  12  11   2   -1.40    4.60
  12  11   2    3.40    3.40
  13  11   2   70.99    9.00
  13  11   2   68.89    8.10
  13  11   2   53.59    9.20
  14 -12  -2   80.79   10.40
  13 -12  -2   18.70    5.90
  12 -12  -2  373.36   19.50
  11 -12  -2    0.60    3.20
  11 -12  -2    5.20    4.00
  10 -12  -2  231.88   11.40
  10 -12  -2  246.18   14.00
  10 -12  -2  241.98   13.00
  10 -12  -2  248.58   11.70
   9 -12  -2    1.20    2.60
   9 -12  -2    4.20    2.50
   9 -12  -2    4.20    3.60
  -9  12   2    3.20    2.30
   8 -12  -2   11.00    3.40
   8 -12  -2    5.00    3.40
   8 -12  -2    9.90    3.40
  -8  12   2   10.60    2.90
   7 -12  -2   17.10    3.90
   7 -12  -2   15.40    3.80
   7 -12  -2   11.10    3.30
  -7  12   2   18.60    3.50
   6 -12  -2   73.69    6.60
   6 -12  -2   74.69    6.20
   6 -12  -2   84.29    7.20
  -6  12   2   64.99    5.90
   5 -12  -2   12.60    3.50
   5 -12  -2   18.10    3.30
   5 -12  -2   17.60    3.60
  -5  12   2   13.20    3.20
   4 -12  -2  402.16   15.20
   4 -12  -2  401.16   15.10
   4 -12  -2  422.36   16.50
   4 -12  -2  394.96   16.60
   4 -12  -2  397.06   18.40
  -4  12   2  432.86   17.20
   3 -12  -2   33.10    4.00
   3 -12  -2   32.60    3.90
   3 -12  -2   38.10    4.00
   3 -12  -2   27.10    4.70
   3 -12  -2   28.00    3.70
  -3  12   2   31.50    4.40
   2 -12  -2  378.86   15.20
   2 -12  -2  383.86   18.40
   2 -12  -2  399.96   15.80
   2 -12  -2  387.96   15.60
   2 -12  -2  393.36   15.90
  -2  12   2  416.96   14.10
  -2  12   2  374.06   16.50
   1 -12  -2   33.80    4.90
   1 -12  -2   44.30    4.90
  -1  12   2   53.59    5.70
  -1  12   2   47.40    5.20
  -1  12   2   52.89    3.70
   0 -12  -2   63.49    5.90
   0 -12  -2   67.39    8.00
   0  12   2   64.79    4.50
   0  12   2   62.29    6.10
   0  12   2   79.09    6.40
  -1 -12  -2  192.68   12.50
  -1 -12  -2  225.48   11.30
   1  12   2  207.58   11.10
   1  12   2  213.88    9.50
   1  12   2  211.88   11.00
  -2 -12  -2   23.90    5.00
  -2 -12  -2   22.90    4.10
   2  12   2   27.80    4.40
   2  12   2   22.80    3.40
   2  12   2   17.90    3.70
  -3 -12  -2   34.90    5.30
   3  12   2   30.50    4.50
   3  12   2   27.10    4.30
   3  12   2   29.30    4.70
  -4 -12  -2  815.72   30.20
   4  12   2  757.92   29.70
   4  12   2  742.23   28.80
   4  12   2  786.72   29.70
  -5 -12  -2    6.40    3.10
   5  12   2   13.80    3.10
   5  12   2   12.80    3.80
   5  12   2   17.50    4.20
   5  12   2   11.40    3.50
  -6 -12  -2  246.98   14.00
   6  12   2  282.27   14.00
   6  12   2  263.47   11.30
   6  12   2  273.47   13.60
   6  12   2  278.47   13.60
  -7 -12  -2   42.20    5.90
   7  12   2   47.70    5.90
   7  12   2   44.10    6.00
   7  12   2   45.60    6.00
   7  12   2   46.90    4.70
   8  12   2   20.50    3.50
   8  12   2   12.20    4.30
   8  12   2   17.90    4.50
   8  12   2   18.90    4.50
   9  12   2   -1.60    2.30
   9  12   2   -0.30    2.90
   9  12   2    2.90    3.70
   9  12   2    1.10    3.00
  10  12   2   -1.90    2.90
  10  12   2    1.30    2.70
  10  12   2    5.30    4.20
  10  12   2   -2.60    2.90
  11  12   2   13.70    4.60
  11  12   2   13.50    4.00
  11  12   2   16.40    4.60
  11  12   2    7.10    5.10
  12  12   2   31.10    5.50
  12  12   2   33.40    7.20
  12  12   2   36.40    5.80
  12  12   2   39.60    6.10
  13 -13  -2  121.39   12.00
  12 -13  -2  177.28   13.00
  11 -13  -2   33.70    5.60
  11 -13  -2   29.20    6.00
  10 -13  -2   43.60    5.30
  10 -13  -2   37.60    4.90
  10 -13  -2   38.50    5.70
  10 -13  -2   50.89    7.00
   9 -13  -2  195.68   11.30
   9 -13  -2  186.38   12.20
   9 -13  -2  202.18   11.10
  -9  13   2  200.08   10.00
   8 -13  -2   33.30    4.90
   8 -13  -2   32.80    5.40
   8 -13  -2   38.20    5.50
  -8  13   2   32.10    4.50
   7 -13  -2   41.20    5.90
   7 -13  -2   46.90    6.10
   7 -13  -2   60.79    6.10
  -7  13   2   46.80    5.30
   6 -13  -2    2.90    3.00
   6 -13  -2    6.70    3.00
   6 -13  -2   10.70    3.20
  -6  13   2    6.50    2.80
   5 -13  -2  262.27   12.60
   5 -13  -2  263.57   12.20
   5 -13  -2  252.57   13.90
  -5  13   2  262.77   12.70
   4 -13  -2   45.60    4.00
   4 -13  -2   50.89    5.10
   4 -13  -2   53.19    5.20
   4 -13  -2   46.10    6.20
   4 -13  -2   42.30    3.80
  -4  13   2   42.10    5.40
   3 -13  -2   33.60    4.10
   3 -13  -2   30.00    4.00
   3 -13  -2   24.80    3.40
   3 -13  -2   22.40    4.80
   3 -13  -2   23.80    3.60
  -3  13   2   28.40    4.80
   2 -13  -2  113.29    6.90
   2 -13  -2  106.69    9.30
   2 -13  -2  111.49    7.30
  -2  13   2  130.09    8.20
   1 -13  -2   -0.80    2.50
   1 -13  -2    1.30    2.30
  -1  13   2    1.20    2.80
  -1  13   2    2.30    1.60
   0 -13  -2  244.98   12.30
   0 -13  -2  244.78   14.40
   0  13   2  240.28   12.20
   0  13   2  244.28   10.30
   0  13   2  241.98   12.60
  -1 -13  -2  393.16   17.10
  -1 -13  -2  366.56   19.10
   1  13   2  418.46   15.50
   1  13   2  356.66   17.10
   1  13   2  380.06   17.10
  -2 -13  -2   68.19    6.80
   2  13   2   74.39    6.90
   2  13   2   72.59    6.90
   2  13   2   70.69    5.50
  -3 -13  -2  176.68   10.70
   3  13   2  176.78   10.70
   3  13   2  169.48   10.30
   3  13   2  179.68    9.50
  -4 -13  -2   15.60    3.80
   4  13   2   17.50    4.10
   4  13   2   13.00    3.90
   4  13   2   15.40    3.60
  -5 -13  -2  277.77   14.60
   5  13   2  276.07   13.40
   5  13   2  262.37   14.10
   5  13   2  269.67   13.90
  -6 -13  -2   64.39    6.80
   6  13   2   85.39    7.20
   6  13   2   81.19    7.70
   6  13   2   69.89    7.60
  -7 -13  -2   85.59    9.80
   7  13   2   70.39    7.70
   7  13   2   84.79    8.00
   7  13   2   97.69    8.30
   8  13   2    1.90    3.50
   8  13   2    5.80    3.60
   8  13   2    6.30    3.50
   9  13   2  246.88   13.60
   9  13   2  225.48   14.00
   9  13   2  223.08   13.20
  10  13   2   49.99    7.00
  10  13   2   46.90    7.40
  10  13   2   41.10    6.40
  11  13   2   42.10    6.50
  11  13   2   47.50    7.90
  11  13   2   51.19    7.20
  13 -14  -2    8.90    6.00
  12 -14  -2  150.88   12.60
  11 -14  -2   75.29    8.10
  11 -14  -2   73.69    6.70
  11 -14  -2   75.79    9.20
  11 -14  -2   75.59    6.60
  10 -14  -2   30.80    5.50
  10 -14  -2   26.20    5.90
  10 -14  -2   33.60    5.00
   9 -14  -2    6.50    3.20
   9 -14  -2   -1.20    3.30
   9 -14  -2    3.90    3.20
  -9  14   2    1.50    2.60
   8 -14  -2  128.09    9.40
   8 -14  -2  124.99    9.40
   8 -14  -2  138.69    9.10
  -8  14   2  118.79    8.20
   7 -14  -2   95.59    8.20
   7 -14  -2   86.89    7.40
   7 -14  -2   86.09    7.20
  -7  14   2   92.99    7.20
   6 -14  -2   56.59    7.00
   6 -14  -2   62.79    6.60
   6 -14  -2   64.39    6.30
  -6  14   2   61.59    6.30
   5 -14  -2  222.68   11.80
   5 -14  -2  246.28   13.90
   5 -14  -2  227.18   11.50
  -5  14   2  251.67   12.20
   4 -14  -2  211.68   11.00
   4 -14  -2  221.98   10.00
   4 -14  -2  229.48    9.80
   4 -14  -2  222.38   13.60
   4 -14  -2  237.28   11.20
  -4  14   2  222.28   12.00
   3 -14  -2    2.70    3.50
   3 -14  -2    3.60    2.50
   3 -14  -2    0.60    2.40
   3 -14  -2    5.20    2.50
  -3  14   2    5.90    3.20
   2 -14  -2  605.74   23.50
   2 -14  -2  603.54   26.70
   2 -14  -2  601.84   23.20
  -2  14   2  635.24   24.80
   1 -14  -2    9.30    3.80
   1 -14  -2    9.30    3.40
  -1  14   2    9.90    3.40
   0 -14  -2   29.20    5.70
   0 -14  -2   24.60    4.20
   0  14   2   17.40    4.10
   0  14   2   33.00    5.30
  -1 -14  -2    6.20    2.90
   1  14   2    4.40    3.00
   1  14   2   -0.60    2.80
   1  14   2    2.20    1.90
  -2 -14  -2  118.39    8.90
   2  14   2  106.99    8.70
   2  14   2  119.39    7.10
   2  14   2  119.19    9.10
  -3 -14  -2   10.90    3.60
   3  14   2    7.10    3.40
   3  14   2   12.40    4.00
   3  14   2   12.90    3.50
  -4 -14  -2  355.36   16.90
   4  14   2  335.77   15.10
   4  14   2  316.67   16.10
   4  14   2  324.67   16.40
  -5 -14  -2  178.28   11.50
   5  14   2  170.58   11.20
   5  14   2  152.18    9.90
   5  14   2  152.28   10.50
  -6 -14  -2  197.48   12.80
   6  14   2  220.28   12.00
   6  14   2  206.38   12.60
   6  14   2  209.18   12.40
   7  14   2   65.19    7.80
   7  14   2   55.59    7.30
   7  14   2   53.29    6.90
   8  14   2   81.19    8.80
   8  14   2   70.49    8.20
   8  14   2   88.59    8.70
   9  14   2   -3.30    3.30
   9  14   2   -3.20    3.50
   9  14   2   -1.30    3.80
  10  14   2  105.29   10.90
  10  14   2   98.19    9.60
  10  14   2   95.79    9.80
  12 -15  -2   16.50    6.10
  11 -15  -2  112.49   11.00
  11 -15  -2  110.49    8.60
  11 -15  -2  104.99    8.40
  11 -15  -2  112.69    9.60
  10 -15  -2   15.40    4.30
  10 -15  -2   19.00    4.60
  10 -15  -2   13.40    4.90
   9 -15  -2    0.40    3.00
   9 -15  -2    1.90    3.90
   9 -15  -2   -5.80    2.80
  -9  15   2   -0.80    2.90
   8 -15  -2    3.50    3.20
   8 -15  -2   -2.50    2.70
   8 -15  -2   -4.10    3.00
  -8  15   2    0.90    2.80
   7 -15  -2   32.40    5.80
   7 -15  -2   41.40    5.30
   7 -15  -2   34.20    5.40
  -7  15   2   31.20    5.10
   6 -15  -2    3.60    2.80
   6 -15  -2    2.10    2.70
   6 -15  -2   -2.30    2.70
  -6  15   2    0.00    2.80
   5 -15  -2  184.78   10.40
   5 -15  -2  195.28   12.70
   5 -15  -2  185.78   10.10
  -5  15   2  164.98   10.60
   4 -15  -2  268.57   12.80
   4 -15  -2  279.27   11.90
   4 -15  -2  272.47   11.50
   4 -15  -2  286.37   16.00
   4 -15  -2  261.17   12.60
  -4  15   2  274.27   13.90
   3 -15  -2   -0.40    3.40
   3 -15  -2    2.70    2.50
   3 -15  -2   -0.90    2.00
  -3  15   2   -0.70    2.80
   2 -15  -2   39.00    7.40
   2 -15  -2   36.90    4.80
   2 -15  -2   40.40    5.10
  -2  15   2   42.80    5.80
   1 -15  -2  300.07   17.50
   1 -15  -2  326.17   14.00
   1 -15  -2  324.87   14.80
  -1  15   2  306.27   15.40
   0 -15  -2    0.90    2.80
   0  15   2    5.40    3.60
  -1 -15  -2   40.40    5.90
   1  15   2   28.20    5.30
  -2 -15  -2  125.09    9.60
   2  15   2  137.09    7.90
   2  15   2  130.19    9.70
   2  15   2  132.09    9.80
  -3 -15  -2  102.09    9.20
   3  15   2   92.19    7.30
   3  15   2  108.89    9.00
   3  15   2  102.69    8.90
  -4 -15  -2   19.20    5.20
   4  15   2   15.00    3.90
   4  15   2   26.70    5.20
   4  15   2   22.00    5.10
  -5 -15  -2  133.69   10.90
   5  15   2  120.29   10.20
   5  15   2  131.79    9.90
   5  15   2  134.69    9.10
  -6 -15  -2    7.70    4.20
   6  15   2   13.30    4.00
   6  15   2    2.10    4.00
   6  15   2    5.90    3.80
   7  15   2   76.89    8.50
   7  15   2   55.69    7.30
   7  15   2   77.29    8.10
   8  15   2  151.78   11.40
   8  15   2  162.68   12.00
   8  15   2  149.39   11.60
   9  15   2  216.38   13.90
   9  15   2  193.78   13.50
   9  15   2  184.28   13.00
  10 -16  -2   43.00    6.30
  10 -16  -2   56.19    7.90
   9 -16  -2   12.30    4.50
   9 -16  -2   15.50    4.80
   8 -16  -2   96.09    8.70
   8 -16  -2  107.39    9.50
  -8  16   2   95.89    8.20
   7 -16  -2   37.40    6.60
   7 -16  -2   37.20    5.90
  -7  16   2   40.00    5.90
   6 -16  -2   33.10    6.00
   6 -16  -2   39.20    5.50
  -6  16   2   43.50    6.10
   5 -16  -2    1.60    4.00
   5 -16  -2    0.60    2.90
  -5  16   2   -4.20    2.80
   4 -16  -2  301.17   12.90
   4 -16  -2  322.87   17.70
   4 -16  -2  301.57   13.40
  -4  16   2  306.17   15.40
   3 -16  -2   27.40    5.80
   3 -16  -2   19.60    3.80
  -3  16   2   21.50    4.80
   2 -16  -2   11.30    4.50
   2 -16  -2   11.70    3.30
  -2  16   2    9.60    3.90
   1 -16  -2   66.19    6.90
  -1  16   2   57.09    6.80
   0 -16  -2    9.10    3.90
   0  16   2    7.80    3.90
  -1 -16  -2   15.10    4.30
   1  16   2   11.30    4.40
  -2 -16  -2  150.58   10.60
   2  16   2  135.39   10.40
  -3 -16  -2   40.40    7.20
   3  16   2   28.90    5.90
   3  16   2   28.00    6.00
  -4 -16  -2   53.79    7.90
   4  16   2   40.70    6.40
   4  16   2   62.19    7.60
   4  16   2   48.10    5.70
  -5 -16  -2  104.69   10.90
   5  16   2  110.19    8.50
   5  16   2  124.09   11.10
   5  16   2  124.79   10.30
  -6 -16  -2  188.78   13.70
   6  16   2  207.88   13.30
   6  16   2  203.78   12.00
   6  16   2  186.08   13.00
   7  16   2    5.40    4.70
   7  16   2    3.40    4.00
   7  16   2    7.00    4.70
   8  16   2   12.60    5.60
   8  16   2   14.30    5.10
   8  16   2   19.30    5.60
   9 -17  -2   65.39    8.50
   9 -17  -2   62.29    8.10
   8 -17  -2   84.99    8.70
   8 -17  -2   82.49    9.50
  -8  17   2  104.59    8.60
   7 -17  -2  128.89   11.00
   7 -17  -2  117.89   15.00
  -7  17   2  121.19    9.50
   6 -17  -2   49.90    7.70
  -6  17   2   47.40    6.70
   5 -17  -2    0.90    3.70
  -5  17   2    1.40    3.60
   4 -17  -2    5.40    2.60
   4 -17  -2    9.50    5.20
  -4  17   2    4.80    3.90
   3 -17  -2  122.59    8.00
   3 -17  -2  119.19   11.50
  -3  17   2  132.79   10.10
   2 -17  -2   35.40    5.20
  -2  17   2   36.10    6.10
   1 -17  -2  261.17   13.70
  -1  17   2  268.77   14.80
   0 -17  -2    7.90    3.60
   0  17   2    3.80    4.20
  -1 -17  -2  421.26   19.20
   1  17   2  368.96   19.10
  -2 -17  -2    0.70    3.60
   2  17   2    7.50    4.40
  -3 -17  -2  171.28   12.50
   3  17   2  168.58   12.10
  -4 -17  -2   50.49    7.30
   4  17   2   83.49    9.10
   4  17   2   72.99    8.10
  -5 -17  -2    1.30    4.10
   5  17   2    5.90    4.70
   5  17   2   10.50    4.70
  -6 -17  -2    5.00    4.40
   6  17   2   -1.80    4.40
   6  17   2    4.30    4.00
   6  17   2    2.70    4.00
   7 -18  -2   14.00    5.30
  -7  18   2   16.30    5.20
   6 -18  -2   85.09   10.80
  -6  18   2   59.29    7.60
   5 -18  -2    5.00    4.10
  -5  18   2   11.00    4.90
   4 -18  -2   73.39   10.50
  -4  18   2   93.09    9.30
   3 -18  -2   42.10    5.20
  -3  18   2   43.00    7.10
   2 -18  -2   53.69    6.50
  -2  18   2   74.59    8.70
   1 -18  -2    9.30    4.20
  -1  18   2    3.00    4.50
   0 -18  -2   97.79    9.30
   0  18   2  109.59   10.30
  -1 -18  -2   11.10    4.90
   1  18   2   14.50    5.30
  -2 -18  -2   75.69    8.60
   2  18   2   82.29    9.60
  -3 -18  -2   30.00    6.80
   3  18   2   26.90    6.60
  -4 -18  -2   22.50    6.00
   4  18   2   27.10    7.10
   4 -19  -2   50.99    8.80
   3 -19  -2  137.49    9.20
  -3  19   2  120.79   11.70
   2 -19  -2    2.40    3.80
  -2  19   2    0.80    5.20
   1 -19  -2   89.99    8.90
  -1  19   2   99.99   10.90
   0 -19  -2    1.90    4.20
   0  19   2   10.40    6.20
  -1 -19  -2  123.49   10.80
   1  19   2  101.19   11.00
  -2 -19   3   42.20    7.30
   1  19  -3    5.70    5.50
  -1 -19   3    2.80    4.20
   0  19  -3   23.70    6.50
   0 -19   3   21.30    5.60
  -1  19  -3   92.09   10.30
   1 -19   3   89.09    9.30
  -2  19  -3   10.60    6.00
   2 -19   3   20.20    5.70
   5  18  -3   10.50    4.60
   5  18  -3    7.30    5.60
  -5 -18   3    2.40    4.40
   4  18  -3  120.29   11.10
   4  18  -3  118.09   11.60
  -4 -18   3  116.79   10.90
   3  18  -3   10.50    4.90
   3  18  -3   11.80    5.60
  -3 -18   3    9.10    4.50
   2  18  -3   59.19    8.60
  -2 -18   3   64.89    8.40
   1  18  -3    1.70    4.40
  -1 -18   3    1.40    3.50
   0  18  -3   34.90    7.00
   0 -18   3   42.70    6.60
  -1  18  -3   64.39    8.20
   1 -18   3   89.19    9.20
  -2  18  -3   -3.90    4.40
   2 -18   3   -4.40    3.10
  -3  18  -3   -7.80    3.70
   3 -18   3   -1.20    3.30
  -4  18  -3  134.99   10.90
   4 -18   3  132.89    9.30
  -5  18  -3   -0.40    4.00
   5 -18   3    0.90    2.90
  -6  18  -3   89.39    9.60
   6 -18   3   94.89   12.10
   7  17  -3  105.69   11.00
   7  17  -3  111.89   11.10
   6  17  -3   13.60    5.40
   6  17  -3    9.10    4.80
   5  17  -3  257.77   15.10
   5  17  -3  244.48   14.80
  -5 -17   3  217.48   14.70
   4  17  -3   20.50    5.40
   4  17  -3   19.60    5.80
  -4 -17   3    9.20    4.20
   3  17  -3   15.70    5.50
   3  17  -3   17.50    4.90
  -3 -17   3   13.60    4.90
   2  17  -3   12.80    4.80
   2  17  -3    9.70    5.10
  -2 -17   3   15.50    4.40
   1  17  -3   73.39    8.60
  -1 -17   3   59.09    7.10
   0  17  -3  114.69   10.40
   0 -17   3  101.09    8.90
  -1  17  -3   97.49    9.50
   1 -17   3  118.49    9.20
  -2  17  -3   -2.70    3.50
   2 -17   3    3.80    3.10
  -3  17  -3    5.70    4.30
   3 -17   3    6.60    3.50
  -4  17  -3   76.39    8.50
   4 -17   3   85.69    7.40
  -5  17  -3   19.50    5.00
   5 -17   3   12.30    3.40
   5 -17   3    6.00    4.40
  -6  17  -3   -1.60    3.80
   6 -17   3   -0.40    3.70
   7 -17   3   42.60    7.30
   8 -17   3   -3.90    3.70
   8 -17   3    3.10    4.10
   9  16  -3    6.40    4.90
   9  16  -3    7.40    4.70
   9  16  -3    1.20    5.00
   8  16  -3   98.19    9.90
   8  16  -3   69.09    8.40
   8  16  -3   77.79    8.30
   7  16  -3    2.00    3.80
   7  16  -3    3.60    3.70
   7  16  -3    5.70    4.30
   6  16  -3  126.89   10.70
   6  16  -3  127.99    9.00
   6  16  -3  152.58   11.00
   5  16  -3    0.00    3.90
   5  16  -3    1.10    3.80
  -5 -16   3    4.20    3.70
   4  16  -3  124.69   10.60
   4  16  -3  137.79   10.50
  -4 -16   3  138.79   10.60
   3  16  -3   30.40    5.20
   3  16  -3   35.30    6.30
  -3 -16   3   23.00    4.80
   2  16  -3   23.20    5.40
   2  16  -3   11.10    4.00
  -2 -16   3   17.10    4.20
   1  16  -3   15.60    4.70
   1  16  -3   29.50    6.40
  -1 -16   3   18.20    4.30
   0  16  -3    4.00    3.80
   0 -16   3    2.20    2.90
  -1  16  -3    1.80    3.60
   1 -16   3    2.30    2.90
  -2  16  -3   90.49    8.80
   2 -16   3   78.49    7.30
  -3  16  -3   -2.10    3.10
   3 -16   3   -0.40    3.30
   3 -16   3   -3.90    2.40
  -4  16  -3    4.40    3.70
   4 -16   3    4.90    4.30
   4 -16   3    0.30    2.30
  -5  16  -3   11.60    4.10
   5 -16   3    9.80    3.00
   5 -16   3   14.50    5.40
   5 -16   3   29.00    6.80
  -6  16  -3   78.69    7.90
   6 -16   3   76.69    7.70
   6 -16   3   81.79    9.80
   7 -16   3    0.40    3.30
   7 -16   3    0.70    4.00
   8 -16   3   -2.80    3.40
   8 -16   3    2.80    3.90
   9 -16   3   68.39    9.40
   9 -16   3   48.30    7.60
  10  15  -3    6.50    5.10
  10  15  -3   14.10    5.50
  10  15  -3   14.00    5.40
   9  15  -3   34.80    6.80
   9  15  -3   42.50    6.70
   9  15  -3   43.80    6.80
   8  15  -3    1.20    3.60
   8  15  -3   -5.70    3.30
   8  15  -3   -4.70    3.50
   7  15  -3  118.09    9.70
   7  15  -3  119.29    9.00
   7  15  -3  110.29   10.20
   6  15  -3   34.40    5.30
   6  15  -3   42.80    6.30
   6  15  -3   33.00    6.10
   5  15  -3   41.00    6.50
   5  15  -3   43.00    6.20
   5  15  -3   40.80    5.30
  -5 -15   3   29.40    5.30
   4  15  -3   33.60    5.90
   4  15  -3   22.40    4.00
   4  15  -3   27.00    5.30
  -4 -15   3   20.60    4.60
   3  15  -3  132.89   10.10
   3  15  -3  135.79   10.10
  -3 -15   3  141.39   10.10
   2  15  -3   33.60    5.20
   2  15  -3   41.70    6.20
  -2 -15   3   30.00    4.90
   1  15  -3  335.07   16.50
   1  15  -3  338.27   16.40
  -1 -15   3  316.67   15.90
   0  15  -3   -2.10    3.20
   0 -15   3    3.90    2.90
  -1  15  -3   35.20    5.80
   1 -15   3   61.29    6.90
  -2  15  -3    1.10    3.00
   2 -15   3    1.60    3.60
   2 -15   3    1.80    2.50
  -3  15  -3  116.69    8.90
   3 -15   3  124.99    8.30
   3 -15   3  113.29   10.40
  -4  15  -3   -3.50    2.70
   4 -15   3    0.40    2.30
   4 -15   3   -1.30    2.80
   4 -15   3    1.90    2.40
  -5  15  -3   56.99    6.50
   5 -15   3   43.60    5.70
   5 -15   3   45.80    5.00
   5 -15   3   47.20    7.00
  -6  15  -3    2.80    3.30
   6 -15   3   11.20    4.80
   6 -15   3    7.50    3.60
   7 -15   3  139.99   10.20
   7 -15   3  155.28   12.00
   8 -15   3   -0.70    3.00
   8 -15   3    0.10    3.60
   9 -15   3   32.50    6.30
   9 -15   3   20.90    5.70
  10 -15   3   -2.80    3.40
  10 -15   3    2.30    4.80
  10 -15   3   -1.40    3.60
  11  14  -3   -0.70    3.60
  11  14  -3   -0.30    3.50
  11  14  -3    1.70    4.70
  10  14  -3   10.30    5.00
  10  14  -3    4.30    4.00
  10  14  -3    8.10    4.40
   9  14  -3    3.00    3.90
   9  14  -3   15.40    4.50
   9  14  -3   13.70    4.50
   8  14  -3    7.10    3.80
   8  14  -3    4.40    3.60
   8  14  -3    4.60    3.80
   7  14  -3    2.50    3.20
   7  14  -3   -0.80    2.70
   7  14  -3    1.10    3.30
   6  14  -3  113.19    9.10
   6  14  -3   96.79    8.50
   6  14  -3  118.79    8.20
  -6 -14   3   95.89    9.10
   5  14  -3  103.59    8.60
   5  14  -3  109.39    8.40
   5  14  -3  108.19    7.40
  -5 -14   3  103.39    8.80
   4  14  -3   97.29    8.30
   4  14  -3   85.59    8.20
   4  14  -3   94.59    6.70
  -4 -14   3  100.19    8.40
   3  14  -3   65.39    7.40
   3  14  -3   66.89    5.20
   3  14  -3   70.59    7.60
  -3 -14   3   64.89    7.50
   2  14  -3  160.78   10.50
   2  14  -3  175.78   10.80
   2  14  -3  191.28   10.30
  -2 -14   3  153.28   10.30
   1  14  -3   32.30    5.50
   1  14  -3   27.30    4.70
  -1 -14   3   29.90    4.80
   0  14  -3  318.97   15.70
   0  14  -3  324.97   15.50
   0 -14   3  316.37   15.10
  -1  14  -3    1.70    3.30
   1 -14   3   -1.00    2.80
   1 -14   3    5.60    2.70
  -2  14  -3   37.70    5.50
   2 -14   3   57.79    8.20
   2 -14   3   47.40    4.60
   2 -14   3   39.20    5.30
  -3  14  -3   10.50    3.70
   3 -14   3   10.10    2.80
   3 -14   3   11.00    4.10
   3 -14   3    8.90    3.00
  -4  14  -3  190.58   11.10
   4 -14   3  193.18   10.30
   4 -14   3  206.78   13.20
   4 -14   3  203.98   10.20
  -5  14  -3  136.89    9.00
   5 -14   3  126.69    8.50
   5 -14   3  108.39   10.00
   5 -14   3  123.59    7.40
  -6  14  -3  139.59    9.00
   6 -14   3  115.09    6.70
   6 -14   3  129.09   10.40
   6 -14   3  116.79    9.00
   7 -14   3    6.00    3.70
   7 -14   3    8.70    3.90
   8 -14   3  210.78   13.00
   8 -14   3  215.98   13.60
   9 -14   3   66.09    8.10
   9 -14   3   99.19    9.70
   9 -14   3   67.39    8.30
  10 -14   3    6.90    4.50
  10 -14   3    1.50    3.60
  10 -14   3    1.80    3.40
  11 -14   3   -3.60    3.20
  11 -14   3   -0.30    4.80
  11 -14   3   -2.30    3.30
  12  13  -3   33.40    6.90
  12  13  -3   22.00    5.50
  12  13  -3   37.00    5.10
  12  13  -3   34.10    5.80
  11  13  -3   22.90    4.60
  11  13  -3   26.90    5.40
  11  13  -3   24.00    4.90
  11  13  -3   18.20    5.60
  10  13  -3  115.29    9.70
  10  13  -3  115.99    9.00
  10  13  -3  116.99    9.10
  10  13  -3  100.69    8.10
   9  13  -3   62.29    7.20
   9  13  -3   54.49    6.60
   9  13  -3   81.29    8.40
   8  13  -3  148.49   10.00
   8  13  -3  150.88   10.30
   8  13  -3  126.69    9.40
   7  13  -3   -2.70    2.50
   7  13  -3    0.50    3.10
   7  13  -3    2.60    3.10
   6  13  -3   -4.50    2.30
   6  13  -3   -1.50    2.80
   6  13  -3   -1.30    2.50
  -6 -13   3   -1.40    2.90
   5  13  -3   19.70    4.00
   5  13  -3   28.60    4.30
   5  13  -3   29.50    5.20
  -5 -13   3   26.40    4.50
   4  13  -3   17.90    4.30
   4  13  -3   18.70    4.50
   4  13  -3   25.90    3.70
  -4 -13   3   22.90    4.80
   3  13  -3  102.69    8.30
   3  13  -3  107.69    8.20
   3  13  -3  102.69    6.40
  -3 -13   3   98.49    8.10
   2  13  -3   74.39    7.00
   2  13  -3   76.29    5.30
   2  13  -3   84.49    7.80
  -2 -13   3   96.09    7.40
   1  13  -3   46.50    3.70
   1  13  -3   41.60    5.70
   1  13  -3   63.09    7.10
  -1 -13   3   33.40    4.50
   0  13  -3   68.89    6.90
   0  13  -3   67.19    6.70
   0 -13   3   73.09    6.60
   0 -13   3   81.39    9.30
  -1  13  -3  766.42   28.70
  -1  13  -3  736.03   28.30
   1 -13   3  734.63   27.80
   1 -13   3  677.03   30.10
   1 -13   3  734.73   25.90
  -2  13  -3  223.48   11.90
   2 -13   3  232.28   10.40
   2 -13   3  209.78   13.40
   2 -13   3  238.38   11.50
  -3  13  -3  130.59    8.90
   3 -13   3  145.59   10.70
   3 -13   3  134.59    7.80
   3 -13   3  132.29    8.20
  -4  13  -3   21.80    4.20
   4 -13   3   29.80    5.90
   4 -13   3   36.50    4.70
   4 -13   3   34.50    4.40
  -5  13  -3  352.36   15.50
   5 -13   3  350.16   17.60
   5 -13   3  322.17   13.70
   5 -13   3  330.77   14.00
   5 -13   3  336.07   15.40
  -6  13  -3    5.40    3.30
   6 -13   3    8.70    2.40
   6 -13   3    5.30    3.50
   6 -13   3    6.00    3.70
   7 -13   3  150.58   11.20
   7 -13   3  157.78   10.50
   8 -13   3   47.20    6.60
   8 -13   3   43.10    6.90
   9 -13   3  132.59   10.30
   9 -13   3  137.09   10.40
   9 -13   3  131.89   10.20
  10 -13   3  311.77   16.30
  10 -13   3  281.17   15.70
  10 -13   3  327.67   17.40
  11 -13   3  109.09   11.00
  11 -13   3  108.79    9.50
  11 -13   3   90.89    8.90
  12 -13   3  143.09   13.40
  12 -13   3  123.19    9.90
  12 -13   3  115.39    9.90
  13  12  -3   20.80    5.10
  13  12  -3   12.20    6.10
  13  12  -3   13.80    5.00
  12  12  -3   36.00    6.00
  12  12  -3   25.80    6.20
  12  12  -3   26.40    5.40
  11  12  -3   -1.00    2.50
  11  12  -3    2.30    4.20
  11  12  -3    6.90    3.60
  11  12  -3    3.90    3.30
  10  12  -3  168.28   11.40
  10  12  -3  158.88    9.80
  10  12  -3  177.18   10.10
  10  12  -3  148.39   10.20
   9  12  -3  110.09    8.70
   9  12  -3  109.09    7.70
   9  12  -3  118.49    8.30
   9  12  -3  108.49    8.80
   8  12  -3  259.37   13.20
   8  12  -3  261.77   12.40
   8  12  -3  272.57   13.90
   8  12  -3  280.67   13.90
   7  12  -3    1.60    3.10
   7  12  -3    5.80    3.30
   7  12  -3    3.40    3.20
   6  12  -3    4.90    3.00
   6  12  -3    0.20    2.80
   6  12  -3    4.00    3.00
  -6 -12   3    7.40    3.10
   5  12  -3   91.99    6.80
   5  12  -3  110.99    8.00
   5  12  -3   92.59    7.50
  -5 -12   3   94.29    7.90
   4  12  -3   42.90    5.50
   4  12  -3   45.20    5.70
   4  12  -3   49.90    4.90
  -4 -12   3   39.50    4.90
   3  12  -3   11.50    3.30
   3  12  -3   11.00    3.20
   3  12  -3    9.10    2.50
  -3 -12   3    5.40    2.50
   2  12  -3 1211.28   42.30
   2  12  -3 1178.08   42.20
[truncated: 1,196,583 more chars]
